# Supplementary material for: appreci8: a pipeline for precise variant calling integrating 8 tools
Source: Oxford University Press journal article supplement (doi:10.1093/bioinformatics/bty518), 2018-06-25
Supplement: bioinformatics_34_24_4205_s2.xlsx [file bioinformatics_34_24_4205_s2.xlsx]

## Sheet: Overview
Ion Torrent test set; n=24	(20, 50, 0.01)
	Mutations (TP)	Polymorphisms (TP)	Mutations (FN)	Polymorphisms (FN)	No Mutations (FP_M)	No Mutations (FP_P)	No Mutations (TN2)	No Mutations (TN1)	Variants	Artifacts	sens	PPV
GATK	63	96	4	2	0	0	2249	0	165	2249	0.854922	0.0683513
Platypus	54	97	6	0	0	0	3007	0	157	3007	0.813472	0.0496207
VarScan	59	97	4	1	0	0	694	0	161	694	0.834197	0.188304
LoFreq	54	98	2	0	1	0	14	6	154	21	0.797927	0.88
FreeBayes	73	104	6	2	3	0	19507	491	185	20001	0.958549	0.00916477
SNVer	72	100	8	2	0	0	6380	12	182	6392	0.943005	0.0276848
SAMtools	42	91	2	1	0	0	66	0	136	66	0.704663	0.673267
VarDict	61	94	8	2	2	0	1166	4	165	1172	0.854922	0.123411
appreci8	73	104	0	0	3	0	0	0	177	3	0.917098	0.983333
Biological truth	73	104	14	2					193	0
Mutations only	(20, 50, 0.01)
	Mutations (TP)	Mutations (FN)	No Mutations (FP_M)	No Mutations (TN2)	No Mutations (TN1)	Mutations	Artifacts	sens	PPV
GATK	63	4	0	2249	0	67	2249	0.770115	0.0289292
Platypus	54	6	0	3007	0	60	3007	0.689655	0.0195631
VarScan	59	4	0	694	0	63	694	0.724138	0.0832232
LoFreq	54	2	1	14	6	56	21	0.643678	0.727273
FreeBayes	73	6	3	19507	491	79	20001	0.908046	0.00393426
SNVer	72	8	0	6380	12	80	6392	0.91954	0.0123609
SAMtools	42	2	0	66	0	44	66	0.505747	0.4
VarDict	61	8	2	1166	4	69	1172	0.793103	0.0556003
appreci8	73	0	3	0	0	73	3	0.83908	0.960526
Biological truth	73	14				87	0

## Sheet: TP Mutations
True because...	Sample	Chr	Pos	Ref	Alt	Gene	ENST	Type	Mutation	Nr_Ref	Nr_Alt	DP	VAF	GATK	Platypus	VarScan	LoFreq	FreeBayes	SNVer	SAMtools	VarDict	Called	ESP6500	G1000	Cosmic	Cosmic_location	Cosmic_occurence	dbSNP_SNPs	dbSNP_SNVs	PM_flag	ExAC	ClinVar_clinical	ClinVar_noimpact	provean_score	prediction	BQ_Ref	BQ_Alt	Nr_Ref_fwd	Nr_Alt_fwd	DP_fwd	VAF_fwd	Nr_Ref_rev	Nr_Alt_rev	DP_rev	VAF_rev	strandbias	nr_samples	nr_samples_similar	Category
Validated by duplicate and Illumina	IT_09	1	115256536	C	T	NRAS	ENST00000369535	missense_variant	Gct/Act|p.Ala59Thr/c.175G>A	29192	11523	40832	0.282205	1	0	1	1	1	1	1	1	7	NO	NO	COSM578	autonomic_ganglia, haematopoietic_and_lymphoid_tissue, pancreas	1, 1, 3	NO	NO	NO	NO	NO	NO	-3.949	Deleterious	30.96	27.24	14690	5963	20706	0.287984	14502	5560	20126	0.27626	0.00971713	2	2	Probably True (-7)
Validated by duplicate and Illumina	IT_10	1	115256536	C	T	NRAS	ENST00000369535	missense_variant	Gct/Act|p.Ala59Thr/c.175G>A	20433	7991	28459	0.28079	1	0	1	1	1	1	0	1	6	NO	NO	COSM578	autonomic_ganglia, haematopoietic_and_lymphoid_tissue, pancreas	1, 1, 3	NO	NO	NO	NO	NO	NO	-3.949	Deleterious	30.84	27.79	10809	4352	15175	0.286787	9624	3639	13284	0.273939	0.0179328	2	2	Probably True (-7)
Validated by duplicate and Illumina	IT_11	1	115258744	C	T	NRAS	ENST00000369535	missense_variant	gGt/gAt|p.Gly13Asp/c.38G>A	302	288	590	0.488136	1	1	1	1	1	1	1	1	8	NO	NO	COSM573	endometrium, haematopoietic_and_lymphoid_tissue, large_intestine, NS, skin, thyroid, upper_aerodigestive_tract	1, 217, 10, 278, 26, 1, 2	NO	rs121434596	YES	8.236e-06	NO	NO	-5.441	Deleterious	29.81	32.39	119	110	229	0.480349	183	178	361	0.493075	0.800039	4	4	Hotspot (-8)
Validated by duplicate and Illumina	IT_12	1	115258744	C	T	NRAS	ENST00000369535	missense_variant	gGt/gAt|p.Gly13Asp/c.38G>A	781	736	1517	0.485168	1	1	1	1	1	1	1	1	8	NO	NO	COSM573	endometrium, haematopoietic_and_lymphoid_tissue, large_intestine, NS, skin, thyroid, upper_aerodigestive_tract	1, 217, 10, 278, 26, 1, 2	NO	rs121434596	YES	8.236e-06	NO	NO	-5.441	Deleterious	30.35	32.88	331	331	662	0.5	450	405	855	0.473684	0.325167	4	4	Hotspot (-8)
Validated by duplicate and Illumina	IT_09	1	115258745	C	A	NRAS	ENST00000369535	missense_variant	Ggt/Tgt|p.Gly13Cys/c.37G>T	1449	151	1602	0.0942572	0	0	0	1	1	1	0	0	3	NO	NO	COSM570	haematopoietic_and_lymphoid_tissue, large_intestine, skin, thyroid	26, 2, 4, 2	NO	rs121434595	YES	NO	NO	NO	-7.663	Deleterious	27.68	26.42	583	67	650	0.103077	866	84	952	0.0882353	0.338851	3	3	Hotspot (-4)
Validated by duplicate and Illumina	IT_10	1	115258745	C	A	NRAS	ENST00000369535	missense_variant	Ggt/Tgt|p.Gly13Cys/c.37G>T	1447	138	1588	0.0869018	0	0	0	1	1	1	0	0	3	NO	NO	COSM570	haematopoietic_and_lymphoid_tissue, large_intestine, skin, thyroid	26, 2, 4, 2	NO	rs121434595	YES	NO	NO	NO	-7.663	Deleterious	27.97	26.09	625	56	683	0.0819912	822	82	905	0.0906077	0.589779	3	3	Hotspot (-4)
Validated by duplicate and Illumina	IT_23	1	115258747	C	T	NRAS	ENST00000369535	missense_variant	gGt/gAt|p.Gly12Asp/c.35G>A	1596	105	1720	0.0610465	0	0	0	1	1	1	0	1	4	0.0116	NO	COSM564	biliary_tract, central_nervous_system, endometrium, genital_tract, haematopoietic_and_lymphoid_tissue, kidney, large_intestine, lung, NS, ovary, pancreas, skin, soft_tissue, testis, thyroid, upper_aerodigestive_tract	4, 5, 4, 2, 381, 1, 60, 1, 570, 1, 1, 61, 2, 3, 2, 1	NO	rs121913237	YES	1.647e-05	NO	NO	-5.5	Deleterious	25.73	29.28	650	44	704	0.0625	946	61	1016	0.0600394	0.837894	2	3	Hotspot (-8)
Validated by duplicate and Illumina	IT_24	1	115258747	C	T	NRAS	ENST00000369535	missense_variant	gGt/gAt|p.Gly12Asp/c.35G>A	707	22	731	0.0300958	0	0	0	0	1	0	0	1	2	0.0116	NO	COSM564	biliary_tract, central_nervous_system, endometrium, genital_tract, haematopoietic_and_lymphoid_tissue, kidney, large_intestine, lung, NS, ovary, pancreas, skin, soft_tissue, testis, thyroid, upper_aerodigestive_tract	4, 5, 4, 2, 381, 1, 60, 1, 570, 1, 1, 61, 2, 3, 2, 1	NO	rs121913237	YES	1.647e-05	NO	NO	-5.5	Deleterious	25.22	30.09	270	10	281	0.0355872	437	12	450	0.0266667	0.510125	2	3	Hotspot (-4)
Validated by duplicate and Illumina	IT_01	1	115258748	C	T	NRAS	ENST00000369535	missense_variant	Ggt/Agt|p.Gly12Ser/c.34G>A	590	455	1047	0.434575	1	1	1	1	1	1	1	0	7	NO	NO	COSM563	haematopoietic_and_lymphoid_tissue, large_intestine, lung, ovary, prostate, skin, soft_tissue, upper_aerodigestive_tract	110, 6, 3, 1, 6, 13, 1, 21	NO	rs121913250	YES	NO	NO	NO	-4.621	Deleterious	27.5	25.86	238	182	420	0.433333	352	273	627	0.435407	0.94928	3	3	Hotspot (-7)
Validated by duplicate and Illumina	IT_02	1	115258748	C	T	NRAS	ENST00000369535	missense_variant	Ggt/Agt|p.Gly12Ser/c.34G>A	260	248	508	0.488189	1	1	1	1	1	1	1	0	7	NO	NO	COSM563	haematopoietic_and_lymphoid_tissue, large_intestine, lung, ovary, prostate, skin, soft_tissue, upper_aerodigestive_tract	110, 6, 3, 1, 6, 13, 1, 21	NO	rs121913250	YES	NO	NO	NO	-4.621	Deleterious	27.77	25.58	107	99	206	0.480583	153	149	302	0.493377	0.786943	3	3	Hotspot (-7)
Validated by duplicate and Illumina	IT_09	2	25457242	C	A	DNMT3A	ENST00000264709	missense_variant	cGc/cTc|p.Arg882Leu/c.2645G>T	1602	1397	3015	0.46335	1	1	1	1	1	1	1	1	8	NO	NO	COSM1583129	haematopoietic_and_lymphoid_tissue	2	NO	NO	NO	0.000593	NO	NO	-6.061	Deleterious	25.32	26.09	770	661	1442	0.458391	832	736	1573	0.467896	0.687021	2	2	Hotspot (-10)
Validated by duplicate and Illumina	IT_10	2	25457242	C	A	DNMT3A	ENST00000264709	missense_variant	cGc/cTc|p.Arg882Leu/c.2645G>T	1297	1169	2480	0.471371	1	1	1	1	1	1	1	1	8	NO	NO	COSM1583129	haematopoietic_and_lymphoid_tissue	2	NO	NO	NO	0.000593	NO	NO	-6.061	Deleterious	24.54	25.75	678	576	1261	0.45678	619	593	1219	0.486464	0.146472	2	2	Hotspot (-10)
Validated by duplicate and Illumina	IT_03	2	25462068	A	G	DNMT3A	ENST00000264709	missense_variant	aTt/aCt|p.Ile780Thr/c.2339T>C	392	258	650	0.396923	1	0	1	1	1	1	1	1	7	0.0116	NO	COSM1583121	haematopoietic_and_lymphoid_tissue	2	NO	rs370751539	NO	NO	NO	NO	-4.232	Deleterious	26.77	31.15	197	117	314	0.372611	195	141	336	0.419643	0.229672	2	12	Probably True (-7)
Validated by duplicate and Illumina	IT_04	2	25462068	A	G	DNMT3A	ENST00000264709	missense_variant	aTt/aCt|p.Ile780Thr/c.2339T>C	428	308	736	0.418478	1	0	1	1	1	1	1	1	7	0.0116	NO	COSM1583121	haematopoietic_and_lymphoid_tissue	2	NO	rs370751539	NO	NO	NO	NO	-4.232	Deleterious	27.01	30.63	227	159	386	0.411917	201	149	350	0.425714	0.709064	2	12	Probably True (-7)
Validated by duplicate and Illumina	IT_19	3	128205184	CG	C	GATA2	ENST00000341105	frameshift_variant	cgc/|p.Arg86fs/c.256delC	3658	2151	6094	0.35297	0	1	1	0	1	1	0	1	5	NO	NO	NO	NO	O	NO	NO	NO	NO	NO	NO	NA	NA	26.55	NA	1880	838	2974	0.281775	1778	1313	3120	0.420833	3.98158e-20	2	19	Probably True (-1)
Validated by duplicate and Illumina	IT_20	3	128205184	CG	C	GATA2	ENST00000341105	frameshift_variant	cgc/|p.Arg86fs/c.256delC	1366	915	2361	0.387548	1	1	1	0	1	1	0	1	6	NO	NO	NO	NO	O	NO	NO	NO	NO	NO	NO	NA	NA	26.97	NA	693	404	1167	0.346187	673	511	1194	0.427973	0.00209115	2	19	Probably True (-2)
Validated by duplicate and Illumina	IT_03	4	106158187	C	T	TET2	ENST00000380013	stop_gained	Cag/Tag|p.Gln1030*/c.3088C>T	412	305	717	0.425384	1	1	1	1	1	1	1	1	8	NO	NO	COSM4766113	haematopoietic_and_lymphoid_tissue	1	NO	NO	NO	8.237e-06	NO	NO	NA	NA	31.44	31.88	187	137	324	0.42284	225	168	393	0.427481	0.939538	2	2	Probably True (-6)
Validated by duplicate and Illumina	IT_04	4	106158187	C	T	TET2	ENST00000380013	stop_gained	Cag/Tag|p.Gln1030*/c.3088C>T	466	331	797	0.415307	1	1	1	1	1	1	1	1	8	NO	NO	COSM4766113	haematopoietic_and_lymphoid_tissue	1	NO	NO	NO	8.237e-06	NO	NO	NA	NA	31.3	31.81	231	161	392	0.410714	235	170	405	0.419753	0.82933	2	2	Probably True (-6)
Validated by duplicate and Illumina	IT_11	4	106164020	T	A	TET2	ENST00000380013	missense_variant	aTt/aAt|p.Ile1177Asn/c.3530T>A	1689	1537	3229	0.475999	1	1	1	1	1	1	1	1	8	NO	NO	NO	NO	O	NO	NO	NO	NO	NO	NO	-6.148	Deleterious	30.65	29.66	857	758	1617	0.468769	832	779	1612	0.483251	0.438029	2	2	Probably True (-7)
Validated by duplicate and Illumina	IT_12	4	106164020	T	A	TET2	ENST00000380013	missense_variant	aTt/aAt|p.Ile1177Asn/c.3530T>A	2631	2641	5279	0.500284	1	1	1	1	1	1	1	1	8	NO	NO	NO	NO	O	NO	NO	NO	NO	NO	NO	-6.148	Deleterious	30.5	29.91	1366	1313	2680	0.489925	1265	1328	2599	0.510966	0.110187	2	2	Probably True (-7)
Validated by duplicate	IT_03	4	106180926	G	T	TET2	ENST00000380013	missense_variant	gaG/gaT|p.Glu1318Asp/c.3954G>T	207	129	336	0.383929	1	1	1	0	1	1	1	1	7	NO	NO	NO	NA	NA	NO	NO	NO	NO	NO	NO	-2.219	Tolerated	28.59	31.74	98	53	151	0.350993	109	76	185	0.410811	0.310228	2	2	Probably True (-3)
Validated by duplicate	IT_04	4	106180926	G	T	TET2	ENST00000380013	missense_variant	gaG/gaT|p.Glu1318Asp/c.3954G>T	261	135	396	0.340909	1	1	1	0	1	1	1	1	7	NO	NO	NO	NA	NA	NO	NO	NO	NO	NO	NO	-2.219	Tolerated	27.78	31.56	110	63	173	0.364162	151	72	223	0.32287	0.394921	2	2	Probably True (-3)
Validated by duplicate and Illumina	IT_01	4	106190882	A	C	TET2	ENST00000380013	missense_variant	aAc/aCc|p.Asn1387Thr/c.4160A>C	7172	1848	9028	0.204696	1	0	1	1	1	1	0	1	6	NO	NO	NO	NA	NA	NO	NO	NO	NO	NO	NO	-5.776	Deleterious	26.37	26.46	3064	782	3850	0.203117	4108	1066	5178	0.205871	0.771729	2	2	Probably True (-7)
Validated by duplicate and Illumina	IT_02	4	106190882	A	C	TET2	ENST00000380013	missense_variant	aAc/aCc|p.Asn1387Thr/c.4160A>C	3097	882	3981	0.221552	1	1	1	1	1	1	0	1	7	NO	NO	NO	NA	NA	NO	NO	NO	NO	NO	NO	-5.776	Deleterious	26.58	27.39	1458	407	1866	0.218114	1639	475	2115	0.224586	0.646336	2	2	Probably True (-7)
Validated by duplicate and Illumina	IT_01	4	106196825	A	T	TET2	ENST00000380013	stop_gained	Aaa/Taa|p.Lys1720*/c.5158A>T	719	660	1379	0.478608	1	1	1	1	1	1	1	1	8	NO	NO	NO	NO	O	NO	NO	NO	NO	NO	NO	NA	NA	23.05	29.24	316	312	628	0.496815	403	348	751	0.463382	0.23377	2	2	Probably True (-6)
Validated by duplicate and Illumina	IT_02	4	106196825	A	T	TET2	ENST00000380013	stop_gained	Aaa/Taa|p.Lys1720*/c.5158A>T	140	148	290	0.510345	1	1	1	1	1	1	1	1	8	NO	NO	NO	NO	O	NO	NO	NO	NO	NO	NO	NA	NA	28.75	30.13	118	127	246	0.51626	22	21	44	0.477273	0.7432	2	2	Probably True (-6)
Validated by duplicate and Illumina	IT_23	5	170837543	C	CTCTG	NPM1	ENST00000517671	frameshift_variant	tgg/tgTCTGg|p.Trp288fs/c.860_863dupTCTG	1735	785	1743	0.450373	1	1	1	0	1	1	0	1	6	NO	NO	NO	NA	NA	NO	NO	NO	8.286e-06	NO	NO	NA	NA	28.91	NA	930	412	934	0.441113	805	373	809	0.461063	0.605247	4	12	Hotspot (-3)
Validated by duplicate and Illumina	IT_24	5	170837543	C	CTCTG	NPM1	ENST00000517671	frameshift_variant	tgg/tgTCTGg|p.Trp288fs/c.860_863dupTCTG	2715	1087	2720	0.399632	1	1	1	0	1	1	0	1	6	NO	NO	NO	NA	NA	NO	NO	NO	8.286e-06	NO	NO	NA	NA	27.66	NA	1436	566	1438	0.393602	1279	521	1282	0.406396	0.666255	4	12	Hotspot (-3)
Validated by duplicate and Illumina	IT_05	5	170837543	C	CTCTG	NPM1	ENST00000517671	frameshift_variant	tgg/tgTCTGg|p.Trp288fs/c.860_863dupTCTG	3121	855	3125	0.2736	1	1	1	0	1	1	0	1	6	NO	NO	NO	NA	NA	NO	NO	NO	8.286e-06	NO	NO	NA	NA	29.27	NA	1925	501	1928	0.259855	1196	354	1197	0.295739	0.104758	4	12	Hotspot (-3)
Validated by duplicate and Illumina	IT_06	5	170837543	C	CTCTG	NPM1	ENST00000517671	frameshift_variant	tgg/tgTCTGg|p.Trp288fs/c.860_863dupTCTG	7353	2185	7367	0.296593	1	1	1	0	1	1	0	1	6	NO	NO	NO	NA	NA	NO	NO	NO	8.286e-06	NO	NO	NA	NA	27.8	NA	4535	1344	4547	0.29558	2818	841	2820	0.298227	0.900318	4	12	Hotspot (-3)
Validated by duplicate and Illumina	IT_09	5	170837545	C	CTGCT	NPM1	ENST00000517671	frameshift_variant	tgg/tgCTTGg|p.Trp288fs/c.863_864insCTTG	9761	4426	9794	0.451909	1	1	1	0	1	1	0	1	6	NO	NO	NO	NA	NA	NO	NO	NO	NO	NO	NO	NA	NA	28.39	NA	5503	2632	5532	0.475777	4258	1794	4262	0.420929	0.000572598	2	2	Hotspot (-6)
Validated by duplicate and Illumina	IT_10	5	170837545	C	CTGCT	NPM1	ENST00000517671	frameshift_variant	tgg/tgCTTGg|p.Trp288fs/c.863_864insCTTG	8898	4238	8953	0.473361	1	1	1	0	1	1	0	1	6	NO	NO	NO	NA	NA	NO	NO	NO	NO	NO	NO	NA	NA	30.12	NA	4582	2231	4632	0.481649	4316	2007	4321	0.464476	0.224744	2	2	Hotspot (-6)
Validated by duplicate and Illumina	IT_11	9	5073732	T	C	JAK2	ENST00000381652	missense_variant	cTt/cCt|p.Leu604Pro/c.1811T>C	399	373	778	0.479434	1	1	1	1	1	1	1	1	8	NO	NO	NO	NO	O	NO	NO	NO	NO	NO	NO	-4.423	Deleterious	28.79	28.34	199	192	391	0.491049	200	181	387	0.4677	0.666208	2	2	Probably True (-7)
Validated by duplicate and Illumina	IT_12	9	5073732	T	C	JAK2	ENST00000381652	missense_variant	cTt/cCt|p.Leu604Pro/c.1811T>C	892	886	1786	0.496081	1	1	1	1	1	1	1	1	8	NO	NO	NO	NO	O	NO	NO	NO	NO	NO	NO	-4.423	Deleterious	29.03	28.7	412	399	812	0.491379	480	487	974	0.5	0.634188	2	2	Probably True (-7)
Validated by duplicate and Illumina	IT_05	11	32417924	C	CAA	WT1	ENST00000332351	frameshift_variant	ccg/ccTTg|p.Thr377fs/c.1127_1128insTT	639	105	639	0.164319	1	1	0	0	1	1	0	1	5	NO	NO	NO	NA	NA	NO	NO	NO	NO	NO	NO	NA	NA	31.05	NA	385	65	385	0.168831	254	40	254	0.15748	0.829571	2	18	Probably True (-1)
Validated by duplicate and Illumina	IT_06	11	32417924	C	CAA	WT1	ENST00000332351	frameshift_variant	ccg/ccTTg|p.Thr377fs/c.1127_1128insTT	1100	155	1101	0.140781	1	1	0	0	1	1	0	1	5	NO	NO	NO	NA	NA	NO	NO	NO	NO	NO	NO	NA	NA	30.77	NA	605	97	606	0.160066	495	58	495	0.117172	0.0838896	2	18	Probably True (-1)
Validated by duplicate and Illumina	IT_05	11	119148991	G	A	CBL	ENST00000264033	missense_variant	tGt/tAt|p.Cys404Tyr/c.1211G>A	1258	493	1753	0.281232	1	0	1	1	1	1	1	1	7	NO	NO	COSM34068	haematopoietic_and_lymphoid_tissue	13	NO	rs192712314	NO	8.236e-06	NO	NO	-10.273	Deleterious	27.78	28.74	685	281	966	0.29089	573	212	787	0.269377	0.336943	2	2	Probably True (-7)
Validated by duplicate and Illumina	IT_06	11	119148991	G	A	CBL	ENST00000264033	missense_variant	tGt/tAt|p.Cys404Tyr/c.1211G>A	1751	666	2417	0.275548	1	0	1	1	1	1	1	1	7	NO	NO	COSM34068	haematopoietic_and_lymphoid_tissue	13	NO	rs192712314	NO	8.236e-06	NO	NO	-10.273	Deleterious	27.83	28.28	867	321	1188	0.270202	884	345	1229	0.280716	0.584853	2	2	Probably True (-7)
Validated by duplicate and Illumina	IT_17	12	25398278	A	C	KRAS	ENST00000256078	missense_variant	gTa/gGa|p.Val14Gly/c.41T>G	1004	49	1054	0.0464896	0	0	0	1	1	1	0	0	3	NO	NO	COSM249887	large_intestine	8	NO	NO	NO	NO	NO	NO	-5.885	Deleterious	30.05	24.33	536	28	565	0.0495575	468	21	489	0.0429448	0.661352	3	3	Probably True (-1)
Validated by duplicate and Illumina	IT_18	12	25398278	A	C	KRAS	ENST00000256078	missense_variant	gTa/gGa|p.Val14Gly/c.41T>G	1583	73	1660	0.0439759	0	0	0	1	1	1	0	0	3	NO	NO	COSM249887	large_intestine	8	NO	NO	NO	NO	NO	NO	-5.885	Deleterious	30.04	23.9	786	42	828	0.0507246	797	31	832	0.0372596	0.231067	3	3	Probably True (-1)
Validated by duplicate and Illumina	IT_17	12	25398281	C	T	KRAS	ENST00000256078	missense_variant	gGc/gAc|p.Gly13Asp/c.38G>A	1004	49	1053	0.0465337	0	0	0	1	1	1	0	1	4	NO	NO	COSM1140132, COSM532	biliary_tract, cervix, endometrium, haematopoietic_and_lymphoid_tissue, large_intestine, liver, lung, oesophagus, pancreas, peritoneum, stomach, upper_aerodigestive_tract, bone, breast, central_nervous_system, gastrointestinal_tract_(site_indeterminate), genital_tract, ovary, pleura, prostate, skin, small_intestine, soft_tissue, thyroid, urinary_tract	25, 7, 71, 150, 4245, 5, 164, 6, 39, 12, 64, 6, 1, 18, 1, 23, 1, 36, 2, 23, 3, 19, 34, 23, 5	NO	rs112445441	YES	NO	NO	NO	-5.483	Deleterious	26.65	28.41	536	28	564	0.0496454	468	21	489	0.0429448	0.661352	2	2	Hotspot (-8)
Validated by duplicate and Illumina	IT_18	12	25398281	C	T	KRAS	ENST00000256078	missense_variant	gGc/gAc|p.Gly13Asp/c.38G>A	1587	74	1663	0.0444979	0	0	0	1	1	1	0	1	4	NO	NO	COSM1140132, COSM532	biliary_tract, cervix, endometrium, haematopoietic_and_lymphoid_tissue, large_intestine, liver, lung, oesophagus, pancreas, peritoneum, stomach, upper_aerodigestive_tract, bone, breast, central_nervous_system, gastrointestinal_tract_(site_indeterminate), genital_tract, ovary, pleura, prostate, skin, small_intestine, soft_tissue, thyroid, urinary_tract	25, 7, 71, 150, 4245, 5, 164, 6, 39, 12, 64, 6, 1, 18, 1, 23, 1, 36, 2, 23, 3, 19, 34, 23, 5	NO	rs112445441	YES	NO	NO	NO	-5.483	Deleterious	26.48	26.57	785	42	827	0.050786	802	32	836	0.0382775	0.235694	2	2	Hotspot (-8)
Validated by duplicate and Illumina	IT_23	12	112888195	T	C	PTPN11	ENST00000351677	missense_variant	Ttt/Ctt|p.Phe71Leu/c.211T>C	1792	241	2039	0.118195	1	1	0	1	1	1	0	1	6	NO	NO	COSM13039	haematopoietic_and_lymphoid_tissue, large_intestine	4, 1	NO	NO	NO	NO	NO	NO	-5.671	Deleterious	25.25	28.39	959	119	1084	0.109779	833	122	955	0.127749	0.242722	2	2	Probably True (-7)
Validated by duplicate and Illumina	IT_24	12	112888195	T	C	PTPN11	ENST00000351677	missense_variant	Ttt/Ctt|p.Phe71Leu/c.211T>C	504	67	572	0.117133	1	1	0	1	1	1	0	1	6	NO	NO	COSM13039	haematopoietic_and_lymphoid_tissue, large_intestine	4, 1	NO	NO	NO	NO	NO	NO	-5.671	Deleterious	24.68	29.9	194	27	222	0.121622	310	40	350	0.114286	0.790521	2	2	Probably True (-7)
Validated by duplicate and Illumina	IT_23	13	28592642	C	A	FLT3	ENST00000241453	missense_variant	Gat/Tat|p.Asp835Tyr/c.2503G>T	1535	514	2052	0.250487	1	0	1	1	1	1	1	1	7	NO	NO	COSM783	haematopoietic_and_lymphoid_tissue	216	NO	NO	NO	NO	NO	NO	-7.899	Deleterious	30.02	29.99	765	265	1032	0.256783	770	249	1020	0.244118	0.507994	3	3	Hotspot (-10)
Validated by duplicate and Illumina	IT_24	13	28592642	C	A	FLT3	ENST00000241453	missense_variant	Gat/Tat|p.Asp835Tyr/c.2503G>T	466	153	619	0.247173	1	1	1	1	1	1	1	1	8	NO	NO	COSM783	haematopoietic_and_lymphoid_tissue	216	NO	NO	NO	NO	NO	NO	-7.899	Deleterious	29.57	29.2	228	78	306	0.254902	238	75	313	0.239617	0.709511	3	3	Hotspot (-10)
Validated by duplicate and Illumina	IT_23	15	90631934	C	T	IDH2	ENST00000330062	missense_variant	cGg/cAg|p.Arg140Gln/c.419G>A	1208	1092	2303	0.474164	1	1	1	1	1	1	1	1	8	NO	NO	COSM41590	haematopoietic_and_lymphoid_tissue	489	NO	rs121913502	YES	0.0001071	NO	NO	-3.75	Deleterious	25.76	28.54	648	580	1229	0.471928	560	512	1074	0.476723	0.80188	4	4	Hotspot (-8)
Validated by duplicate and Illumina	IT_24	15	90631934	C	T	IDH2	ENST00000330062	missense_variant	cGg/cAg|p.Arg140Gln/c.419G>A	414	389	804	0.483831	1	1	1	1	1	1	1	1	8	NO	NO	COSM41590	haematopoietic_and_lymphoid_tissue	489	NO	rs121913502	YES	0.0001071	NO	NO	-3.75	Deleterious	22.8	27.54	220	197	417	0.472422	194	192	387	0.496124	0.48086	4	4	Hotspot (-8)
Validated by duplicate and Illumina	IT_13	15	90631934	C	T	IDH2	ENST00000330062	missense_variant	cGg/cAg|p.Arg140Gln/c.419G>A	387	228	615	0.370732	1	1	1	1	1	1	1	1	8	NO	NO	COSM41590	haematopoietic_and_lymphoid_tissue	489	NO	rs121913502	YES	0.0001071	NO	NO	-3.75	Deleterious	26.13	31.43	209	130	339	0.383481	178	98	276	0.355072	0.50221	4	4	Hotspot (-8)
Validated by duplicate and Illumina	IT_14	15	90631934	C	T	IDH2	ENST00000330062	missense_variant	cGg/cAg|p.Arg140Gln/c.419G>A	628	409	1039	0.393648	1	1	1	1	1	1	1	1	8	NO	NO	COSM41590	haematopoietic_and_lymphoid_tissue	489	NO	rs121913502	YES	0.0001071	NO	NO	-3.75	Deleterious	25.59	29.57	347	233	581	0.401033	281	176	458	0.384279	0.608933	4	4	Hotspot (-8)
Validated by duplicate and Illumina	IT_09	15	90631935	G	A	IDH2	ENST00000330062	missense_variant	Cgg/Tgg|p.Arg140Trp/c.418C>T	951	834	1788	0.466443	1	1	1	1	1	1	1	1	8	NO	NO	COSM41877	haematopoietic_and_lymphoid_tissue, large_intestine	10, 2	NO	NO	NO	NO	NO	NO	-7.5	Deleterious	25.78	28.83	520	445	965	0.46114	431	389	823	0.472661	0.600615	2	2	Hotspot (-10)
Validated by duplicate and Illumina	IT_10	15	90631935	G	A	IDH2	ENST00000330062	missense_variant	Cgg/Tgg|p.Arg140Trp/c.418C>T	1117	924	2041	0.452719	1	1	1	1	1	1	1	1	8	NO	NO	COSM41877	haematopoietic_and_lymphoid_tissue, large_intestine	10, 2	NO	NO	NO	NO	NO	NO	-7.5	Deleterious	24.74	26.85	572	471	1043	0.451582	545	453	998	0.453908	0.929144	2	2	Hotspot (-10)
Validated by duplicate and Illumina	IT_21	17	7577126	T	G	TP53	ENST00000269305	missense_variant	gAg/gCg|p.Glu271Ala/c.812A>C	1617	969	2591	0.373987	1	1	1	1	1	1	1	1	8	NO	NO	NO	NA	NA	NO	NO	NO	NO	NO	NO	-5.626	Deleterious	32.77	31.87	813	433	1249	0.346677	804	536	1342	0.399404	0.00644341	2	2	Probably True (-7)
Validated by duplicate and Illumina	IT_22	17	7577126	T	G	TP53	ENST00000269305	missense_variant	gAg/gCg|p.Glu271Ala/c.812A>C	2734	1164	3907	0.297927	1	1	1	1	1	1	1	1	8	NO	NO	NO	NA	NA	NO	NO	NO	NO	NO	NO	-5.626	Deleterious	32.14	31.54	1503	566	2071	0.273298	1231	598	1836	0.325708	0.000302734	2	2	Probably True (-7)
Validated by duplicate and Illumina	IT_21	17	7577136	T	A	TP53	ENST00000269305	missense_variant	Aac/Tac|p.Asn268Tyr/c.802A>T	1395	971	2372	0.409359	1	1	1	1	1	1	1	1	8	NO	NO	NO	NA	NA	NO	NO	NO	NO	NO	NO	-2.133	Tolerated	29.88	31.19	663	433	1099	0.393995	732	538	1273	0.422624	0.166732	2	4	Probably True (-6)
Validated by duplicate and Illumina	IT_22	17	7577136	T	A	TP53	ENST00000269305	missense_variant	Aac/Tac|p.Asn268Tyr/c.802A>T	1605	1156	2767	0.417781	1	1	1	1	1	1	1	1	8	NO	NO	NO	NA	NA	NO	NO	NO	NO	NO	NO	-2.133	Tolerated	30.35	31.31	805	556	1366	0.407028	800	600	1401	0.428266	0.29761	2	4	Probably True (-6)
Validated by duplicate and Illumina	IT_03	17	7577517	A	C	TP53	ENST00000269305	missense_variant	aTc/aGc|p.Ile255Ser/c.764T>G	246	241	487	0.494867	1	1	1	1	1	1	1	1	8	NO	NO	COSM3403258, COSM1637748, COSM437489, COSM10788, COSM437488	bone, breast, central_nervous_system, oesophagus, endometrium, lung, ovary, upper_aerodigestive_tract, urinary_tract	5, 5, 9, 10, 1, 1, 1, 2, 1	NO	NO	NO	NO	NO	NO	-4.534	Deleterious	31.02	31.56	114	105	219	0.479452	132	136	268	0.507463	0.584816	2	2	Probably True (-7)
Validated by duplicate and Illumina	IT_04	17	7577517	A	C	TP53	ENST00000269305	missense_variant	aTc/aGc|p.Ile255Ser/c.764T>G	278	251	529	0.47448	1	1	1	1	1	1	1	1	8	NO	NO	COSM3403258, COSM1637748, COSM437489, COSM10788, COSM437488	bone, breast, central_nervous_system, oesophagus, endometrium, lung, ovary, upper_aerodigestive_tract, urinary_tract	5, 5, 9, 10, 1, 1, 1, 2, 1	NO	NO	NO	NO	NO	NO	-4.534	Deleterious	30.78	30.73	127	89	216	0.412037	151	162	313	0.517572	0.0211855	2	2	Probably True (-7)
Validated by duplicate and Illumina	IT_15	17	7579355	A	C	TP53	ENST00000269305	missense_variant	cTg/cGg|p.Leu111Arg/c.332T>G	3126	1015	4165	0.243697	1	0	1	1	1	1	0	0	5	NO	NO	COSM307283, COSM307284, COSM1646884, COSM3742473, COSM44570	haematopoietic_and_lymphoid_tissue, liver, lung, breast, central_nervous_system, large_intestine	3, 13, 5, 1, 1, 1	NO	NO	NO	NO	NO	NO	-4.647	Deleterious	28.58	24.09	1347	471	1821	0.258649	1779	544	2344	0.232082	0.0687503	2	2	Probably True (-3)
Validated by duplicate and Illumina	IT_16	17	7579355	A	C	TP53	ENST00000269305	missense_variant	cTg/cGg|p.Leu111Arg/c.332T>G	2664	921	3601	0.255762	1	0	1	1	1	1	1	0	6	NO	NO	COSM307283, COSM307284, COSM1646884, COSM3742473, COSM44570	haematopoietic_and_lymphoid_tissue, liver, lung, breast, central_nervous_system, large_intestine	3, 13, 5, 1, 1, 1	NO	NO	NO	NO	NO	NO	-4.647	Deleterious	28.77	24.37	1185	399	1591	0.250786	1479	522	2010	0.259701	0.563763	2	2	Probably True (-4)
Validated by duplicate and Illumina	IT_07	19	33792350	A	T	CEBPA	ENST00000498907	missense_variant	cTg/cAg|p.Leu324Gln/c.971T>A	954	619	1583	0.39103	1	1	1	1	1	1	1	1	8	NO	NO	COSM18613	haematopoietic_and_lymphoid_tissue	2	NO	NO	NO	NO	NO	NO	-5.886	Deleterious	28.91	28.34	548	341	897	0.380156	406	278	686	0.405248	0.376258	2	2	Probably True (-7)
Validated by duplicate and Illumina	IT_08	19	33792350	A	T	CEBPA	ENST00000498907	missense_variant	cTg/cAg|p.Leu324Gln/c.971T>A	656	568	1233	0.460665	1	1	1	1	1	1	1	1	8	NO	NO	COSM18613	haematopoietic_and_lymphoid_tissue	2	NO	NO	NO	NO	NO	NO	-5.886	Deleterious	28.84	28.65	328	270	606	0.445545	328	298	627	0.475279	0.3906	2	2	Probably True (-7)
Validated by duplicate and Illumina	IT_07	19	33792375	C	CCAG	CEBPA	ENST00000498907	inframe_insertion	ctg/ctgCTG|p.Leu315dup/c.943_945dupCTG	787	377	787	0.479034	1	1	1	0	1	1	0	1	6	NO	NO	NO	NA	NA	NO	NO	NO	NO	NO	NO	-9.471	Deleterious	28.3	NA	539	252	539	0.467532	248	125	248	0.504032	0.591583	2	2	Probably True (-4)
Validated by duplicate and Illumina	IT_08	19	33792375	C	CCAG	CEBPA	ENST00000498907	inframe_insertion	ctg/ctgCTG|p.Leu315dup/c.943_945dupCTG	824	355	826	0.429782	1	1	1	0	1	1	0	1	6	NO	NO	NO	NA	NA	NO	NO	NO	NO	NO	NO	-9.471	Deleterious	26.87	NA	444	191	446	0.428251	380	164	380	0.431579	1	2	2	Probably True (-4)
Validated by duplicate	IT_01	19	33792501	C	CCTTACCCG	CEBPA	ENST00000498907	frameshift_variant	aag/aagCGGGTAAG|p.Ala274fs/c.819_820insCGGGTAAG	586	175	591	0.296108	1	1	1	0	1	1	0	1	6	NO	NO	NO	NA	NA	NO	NO	NO	NO	NO	NO	NA	NA	25.75	NA	463	152	468	0.324786	123	23	123	0.186992	0.0214651	2	2	Probably True (-3)
Validated by duplicate	IT_02	19	33792501	C	CCTTACCCG	CEBPA	ENST00000498907	frameshift_variant	aag/aagCGGGTAAG|p.Ala274fs/c.819_820insCGGGTAAG	193	40	193	0.207254	1	1	0	0	1	1	1	1	6	NO	NO	NO	NA	NA	NO	NO	NO	NO	NO	NO	NA	NA	25.85	NA	137	38	137	0.277372	56	2	56	0.0357143	0.000984409	2	2	Probably True (-2)
Validated by duplicate and Illumina	IT_17	20	31022435	CA	C	ASXL1	ENST00000375687	frameshift_variant	atc/|p.Ile641fs/c.1921delA	669	277	968	0.286157	1	1	1	0	1	1	0	0	5	NO	NO	NO	NA	NA	NO	NO	NO	NO	NO	NO	NA	NA	26.86	NA	616	212	840	0.252381	53	65	128	0.507812	4.66186e-10	2	9	Probably True (-1)
Validated by duplicate and Illumina	IT_18	20	31022435	CA	C	ASXL1	ENST00000375687	frameshift_variant	atc/|p.Ile641fs/c.1921delA	672	217	917	0.236641	1	1	1	0	1	1	0	0	5	NO	NO	NO	NA	NA	NO	NO	NO	NO	NO	NO	NA	NA	26.79	NA	628	159	796	0.199749	44	58	121	0.479339	5.67672e-14	2	9	Probably True (-1)
Manual inspection; IGV, expert	IT_20	21	36206794	G	A	RUNX1	ENST00000344691	missense_variant	Cca/Tca|p.Pro213Ser/c.637C>T	2499	543	3093	0.175558	0	0	0	1	1	1	1	1	5	NO	NO	NO	NO	O	NO	NO	NO	NO	NO	NO	-3.011	Deleterious	30.75	33.17	2290	299	2601	0.114956	209	244	492	0.495935	1.29475e-83	4	12	Probably True (-4)
Validated by duplicate and Illumina	IT_11	21	36231782	C	T	RUNX1	ENST00000344691	missense_variant	cGa/cAa|p.Arg174Gln/c.521G>A	1803	1053	2881	0.365498	1	1	1	1	1	1	1	0	7	NO	NO	NO	NA	NA	NO	rs74315450	YES	NO	NO	NO	-3.597	Deleterious	28.91	24.22	809	761	1589	0.478918	994	292	1292	0.226006	7.29926e-47	2	18	Probably True (-5)
Validated by duplicate and Illumina	IT_12	21	36231782	C	T	RUNX1	ENST00000344691	missense_variant	cGa/cAa|p.Arg174Gln/c.521G>A	2900	1892	4853	0.389862	1	1	1	1	1	1	1	0	7	NO	NO	NO	NA	NA	NO	rs74315450	YES	NO	NO	NO	-3.597	Deleterious	28.15	23.96	1367	1336	2753	0.485289	1533	556	2100	0.264762	1.06315e-58	2	18	Probably True (-5)
Validated by duplicate and Illumina	IT_01	21	36252874	A	T	RUNX1	ENST00000344691	missense_variant	tTt/tAt|p.Phe136Tyr/c.407T>A	1424	370	1797	0.205899	1	1	1	1	1	1	0	1	7	NO	NO	NO	NA	NA	NO	NO	NO	NO	NO	NO	-2.611	Deleterious	30.41	30.83	620	120	741	0.161943	804	250	1056	0.236742	0.000113487	2	2	Probably True (-6)
Validated by duplicate and Illumina	IT_02	21	36252874	A	T	RUNX1	ENST00000344691	missense_variant	tTt/tAt|p.Phe136Tyr/c.407T>A	644	158	803	0.196762	1	1	1	1	1	1	0	1	7	NO	NO	NO	NA	NA	NO	NO	NO	NO	NO	NO	-2.611	Deleterious	30.42	30.99	296	69	365	0.189041	348	89	438	0.203196	0.655973	2	2	Probably True (-6)
														63	54	59	54	73	72	42	61

## Sheet: TP Polymorphisms
True because...	Sample	Chr	Pos	Ref	Alt	Gene	ENST	Type	Mutation	Nr_Ref	Nr_Alt	DP	VAF	GATK	Platypus	VarScan	LoFreq	FreeBayes	SNVer	SAMtools	VarDict	Called	ESP6500	G1000	Cosmic	Cosmic_location	Cosmic_occurence	dbSNP_SNPs	dbSNP_SNVs	PM_flag	ExAC	ClinVar_clinical	ClinVar_noimpact	provean_score	prediction	BQ_Ref	BQ_Alt	Nr_Ref_fwd	Nr_Alt_fwd	DP_fwd	VAF_fwd	Nr_Ref_rev	Nr_Alt_rev	DP_rev	VAF_rev	strandbias	nr_samples	nr_samples_similar	Category
Manual inspection; IGV, expert	IT_24	2	25471057	T	C	DNMT3A	ENST00000264709	missense_variant	gAg/gGg|p.Glu235Gly/c.704A>G	306	243	550	0.441818	0	1	0	0	1	0	0	0	2	NO	NO	NO	NO	O	NO	NO	NO	NO	NO	NO	-0.456	Tolerated	22.66	23.28	154	242	397	0.609572	152	1	153	0.00653595	5.65971e-47	33	33	Polymorphism
Validated by duplicate	IT_15	2	25471057	T	C	DNMT3A	ENST00000264709	missense_variant	gAg/gGg|p.Glu235Gly/c.704A>G	951	248	1200	0.206667	0	0	0	0	1	1	0	0	2	NO	NO	NO	NO	O	NO	NO	NO	NO	NO	NO	-0.456	Tolerated	25.23	24.21	556	246	803	0.306351	395	2	397	0.00503778	1.87202e-46	33	33	Polymorphism
Validated by duplicate	IT_16	2	25471057	T	C	DNMT3A	ENST00000264709	missense_variant	gAg/gGg|p.Glu235Gly/c.704A>G	298	205	503	0.407555	0	1	0	0	1	0	0	0	2	NO	NO	NO	NO	O	NO	NO	NO	NO	NO	NO	-0.456	Tolerated	26.51	23.99	177	205	382	0.536649	121	0	121	0	1.00044e-33	33	33	Polymorphism
Manual inspection; IGV, expert	IT_20	2	25471057	T	C	DNMT3A	ENST00000264709	missense_variant	gAg/gGg|p.Glu235Gly/c.704A>G	103	77	180	0.427778	0	0	0	0	1	0	0	0	1	NO	NO	NO	NO	O	NO	NO	NO	NO	NO	NO	-0.456	Tolerated	24.94	24.99	47	77	124	0.620968	56	0	56	0	2.9818e-18	33	33	Polymorphism
Validated by duplicate	IT_19	3	128204951	C	T	GATA2	ENST00000341105	missense_variant	Gcc/Acc|p.Ala164Thr/c.490G>A	2155	2374	4533	0.523715	1	0	1	1	1	1	1	1	7	16.2209	NO	COSM445531	soft_tissue	13	rs2335052	rs2335052	NO	0.192	NO	YES	-0.506	Tolerated	30.45	30.78	1354	1576	2933	0.537334	801	798	1600	0.49875	0.0127747	2	2	Polymorphism
Validated by duplicate	IT_20	3	128204951	C	T	GATA2	ENST00000341105	missense_variant	Gcc/Acc|p.Ala164Thr/c.490G>A	507	549	1059	0.518414	1	1	1	1	1	1	1	1	8	16.2209	NO	COSM445531	soft_tissue	13	rs2335052	rs2335052	NO	0.192	NO	YES	-0.506	Tolerated	29.82	30.57	284	311	596	0.521812	223	238	463	0.514039	0.852352	2	2	Polymorphism
Validated by duplicate and Illumina	IT_03	4	55593464	A	C	KIT	ENST00000288135	missense_variant	Atg/Ctg|p.Met541Leu/c.1621A>C	434	432	869	0.497123	1	1	1	1	1	1	1	1	8	11.186	NO	COSM28026	haematopoietic_and_lymphoid_tissue, skin, soft_tissue, stomach	3, 1, 3, 1	rs3822214	rs3822214	NO	0.079	NO	YES	0.35	Tolerated	30.35	29.47	233	200	433	0.461894	201	232	436	0.53211	0.0350701	8	8	Polymorphism
Validated by duplicate and Illumina	IT_04	4	55593464	A	C	KIT	ENST00000288135	missense_variant	Atg/Ctg|p.Met541Leu/c.1621A>C	582	603	1187	0.508003	1	1	1	1	1	1	1	1	8	11.186	NO	COSM28026	haematopoietic_and_lymphoid_tissue, skin, soft_tissue, stomach	3, 1, 3, 1	rs3822214	rs3822214	NO	0.079	NO	YES	0.35	Tolerated	30.59	30	289	321	612	0.52451	293	282	575	0.490435	0.222655	8	8	Polymorphism
Validated by duplicate and Illumina	IT_11	4	55593464	A	C	KIT	ENST00000288135	missense_variant	Atg/Ctg|p.Met541Leu/c.1621A>C	1632	1581	3220	0.490994	1	1	1	1	1	1	1	1	8	11.186	NO	COSM28026	haematopoietic_and_lymphoid_tissue, skin, soft_tissue, stomach	3, 1, 3, 1	rs3822214	rs3822214	NO	0.079	NO	YES	0.35	Tolerated	31.58	31.98	885	893	1781	0.501404	747	688	1439	0.47811	0.201528	8	8	Polymorphism
Validated by duplicate and Illumina	IT_12	4	55593464	A	C	KIT	ENST00000288135	missense_variant	Atg/Ctg|p.Met541Leu/c.1621A>C	2536	2467	5005	0.492907	1	1	1	1	1	1	1	1	8	11.186	NO	COSM28026	haematopoietic_and_lymphoid_tissue, skin, soft_tissue, stomach	3, 1, 3, 1	rs3822214	rs3822214	NO	0.079	NO	YES	0.35	Tolerated	30.72	31.19	1451	1407	2860	0.491958	1085	1060	2145	0.494172	0.909023	8	8	Polymorphism
Validated by duplicate and Illumina	IT_05	4	55593464	A	C	KIT	ENST00000288135	missense_variant	Atg/Ctg|p.Met541Leu/c.1621A>C	2876	2857	5739	0.497822	1	1	1	1	1	1	1	1	8	11.186	NO	COSM28026	haematopoietic_and_lymphoid_tissue, skin, soft_tissue, stomach	3, 1, 3, 1	rs3822214	rs3822214	NO	0.079	NO	YES	0.35	Tolerated	28.82	28.48	1554	1502	3060	0.49085	1322	1355	2679	0.505786	0.277761	8	8	Polymorphism
Validated by duplicate and Illumina	IT_06	4	55593464	A	C	KIT	ENST00000288135	missense_variant	Atg/Ctg|p.Met541Leu/c.1621A>C	3133	3057	6197	0.493303	1	1	1	1	1	1	1	1	8	11.186	NO	COSM28026	haematopoietic_and_lymphoid_tissue, skin, soft_tissue, stomach	3, 1, 3, 1	rs3822214	rs3822214	NO	0.079	NO	YES	0.35	Tolerated	29.1	28.66	1573	1617	3193	0.50642	1560	1440	3004	0.479361	0.0347996	8	8	Polymorphism
Validated by duplicate and Illumina	IT_17	4	55593464	A	C	KIT	ENST00000288135	missense_variant	Atg/Ctg|p.Met541Leu/c.1621A>C	1665	1524	3193	0.477294	1	1	1	1	1	1	1	1	8	11.186	NO	COSM28026	haematopoietic_and_lymphoid_tissue, skin, soft_tissue, stomach	3, 1, 3, 1	rs3822214	rs3822214	NO	0.079	NO	YES	0.35	Tolerated	29.76	29.99	873	814	1689	0.481942	792	710	1504	0.472074	0.594315	8	8	Polymorphism
Validated by duplicate and Illumina	IT_18	4	55593464	A	C	KIT	ENST00000288135	missense_variant	Atg/Ctg|p.Met541Leu/c.1621A>C	1705	1573	3284	0.478989	1	1	1	1	1	1	1	1	8	11.186	NO	COSM28026	haematopoietic_and_lymphoid_tissue, skin, soft_tissue, stomach	3, 1, 3, 1	rs3822214	rs3822214	NO	0.079	NO	YES	0.35	Tolerated	30.76	31.16	930	836	1769	0.472583	775	737	1515	0.486469	0.440448	8	8	Polymorphism
Validated by duplicate and Illumina	IT_01	4	106155185	C	G	TET2	ENST00000380013	missense_variant	cCt/cGt|p.Pro29Arg/c.86C>G	907	900	1807	0.498063	1	1	1	1	1	1	1	1	8	1.5465	NO	COSM5020248, COSM5020249	soft_tissue	4	rs12498609	rs12498609	NO	0.06	NO	YES	-1.923	Tolerated	28.7	27.99	415	425	840	0.505952	492	475	967	0.49121	0.540034	4	4	Polymorphism
Validated by duplicate and Illumina	IT_02	4	106155185	C	G	TET2	ENST00000380013	missense_variant	cCt/cGt|p.Pro29Arg/c.86C>G	492	407	900	0.452222	1	1	1	1	1	1	1	1	8	1.5465	NO	COSM5020248, COSM5020249	soft_tissue	4	rs12498609	rs12498609	NO	0.06	NO	YES	-1.923	Tolerated	29.07	28.94	225	176	402	0.437811	267	231	498	0.463855	0.459357	4	4	Polymorphism
Validated by duplicate and Illumina	IT_21	4	106155185	C	G	TET2	ENST00000380013	missense_variant	cCt/cGt|p.Pro29Arg/c.86C>G	1016	881	1899	0.463928	1	1	1	1	1	1	1	1	8	1.5465	NO	COSM5020248, COSM5020249	soft_tissue	4	rs12498609	rs12498609	NO	0.06	NO	YES	-1.923	Tolerated	30.19	29.41	408	371	779	0.476252	608	510	1120	0.455357	0.399836	4	4	Polymorphism
Validated by duplicate and Illumina	IT_22	4	106155185	C	G	TET2	ENST00000380013	missense_variant	cCt/cGt|p.Pro29Arg/c.86C>G	1131	988	2121	0.465818	1	1	1	1	1	1	1	1	8	1.5465	NO	COSM5020248, COSM5020249	soft_tissue	4	rs12498609	rs12498609	NO	0.06	NO	YES	-1.923	Tolerated	30.51	30.35	418	372	791	0.470291	713	616	1330	0.463158	0.752734	4	4	Polymorphism
Validated by duplicate and Illumina	IT_23	4	106155199	C	T	TET2	ENST00000380013	missense_variant	Ctc/Ttc|p.Leu34Phe/c.100C>T	1470	1402	2873	0.487992	1	1	1	1	1	1	1	1	8	1.8953	NO	NO	NO	O	NO	rs111948941	NO	0.015	NO	YES	-1.31	Tolerated	29.95	26.83	634	599	1234	0.485413	836	803	1639	0.489933	0.850459	2	2	Polymorphism
Validated by duplicate and Illumina	IT_24	4	106155199	C	T	TET2	ENST00000380013	missense_variant	Ctc/Ttc|p.Leu34Phe/c.100C>T	597	574	1218	0.471264	1	1	1	1	1	1	1	1	8	1.8953	NO	NO	NO	O	NO	rs111948941	NO	0.015	NO	YES	-1.31	Tolerated	29.61	25.08	264	236	546	0.432234	333	338	672	0.502976	0.288063	2	2	Polymorphism
Validated by duplicate and Illumina	IT_23	4	106155751	G	A	TET2	ENST00000380013	missense_variant	Gtg/Atg|p.Val218Met/c.652G>A	566	620	1188	0.521886	1	1	1	1	1	1	1	1	8	2.093	NO	COSM4416139, COSM4416140	haematopoietic_and_lymphoid_tissue	2	rs6843141	rs6843141	NO	0.055	NO	YES	0.498	Tolerated	30.39	30.07	389	347	737	0.470828	177	273	451	0.605322	6.82998e-06	2	2	Polymorphism
Validated by duplicate and Illumina	IT_24	4	106155751	G	A	TET2	ENST00000380013	missense_variant	Gtg/Atg|p.Val218Met/c.652G>A	341	370	712	0.519663	1	1	1	1	1	1	1	1	8	2.093	NO	COSM4416139, COSM4416140	haematopoietic_and_lymphoid_tissue	2	rs6843141	rs6843141	NO	0.055	NO	YES	0.498	Tolerated	29.23	29.09	168	191	360	0.530556	173	179	352	0.508523	0.548618	2	2	Polymorphism
Validated by duplicate and Illumina	IT_05	4	106156163	G	A	TET2	ENST00000380013	missense_variant	gGt/gAt|p.Gly355Asp/c.1064G>A	1066	936	2004	0.467066	1	1	1	1	1	1	1	1	8	4.3721	NO	NO	NO	O	rs61744960	rs61744960	NO	0.027	NO	YES	-1.044	Tolerated	27.62	30.24	553	482	1036	0.465251	513	454	968	0.469008	0.893049	2	2	Polymorphism
Validated by duplicate and Illumina	IT_06	4	106156163	G	A	TET2	ENST00000380013	missense_variant	gGt/gAt|p.Gly355Asp/c.1064G>A	1576	1598	3174	0.503466	1	1	1	1	1	1	1	1	8	4.3721	NO	NO	NO	O	rs61744960	rs61744960	NO	0.027	NO	YES	-1.044	Tolerated	27.76	30.04	779	838	1617	0.518244	797	760	1557	0.488118	0.0951443	2	2	Polymorphism
Manual inspection; IGV, expert	IT_16	4	106156437	A	T	TET2	ENST00000380013	missense_variant	ttA/ttT|p.Leu446Phe/c.1338A>T	173	134	308	0.435065	0	0	0	0	1	0	0	0	1	NO	NO	NO	NO	O	NO	NO	NO	NO	NO	NO	-0.961	Tolerated	24.56	23.66	90	0	90	0	83	134	218	0.614679	2.8913e-29	19	19	Polymorphism
Validated by duplicate and Illumina	IT_13	4	106196829	T	G	TET2	ENST00000380013	missense_variant	tTg/tGg|p.Leu1721Trp/c.5162T>G	252	253	506	0.5	1	1	1	1	1	1	1	1	8	13.4821	NO	COSM5020013	soft_tissue	4	rs34402524	rs34402524	NO	0.118	NO	YES	-0.294	Tolerated	31.63	29.84	111	120	232	0.517241	141	133	274	0.485401	0.47527	2	2	Polymorphism
Validated by duplicate and Illumina	IT_14	4	106196829	T	G	TET2	ENST00000380013	missense_variant	tTg/tGg|p.Leu1721Trp/c.5162T>G	139	225	366	0.614754	1	1	1	1	1	1	1	1	8	13.4821	NO	COSM5020013	soft_tissue	4	rs34402524	rs34402524	NO	0.118	NO	YES	-0.294	Tolerated	29.4	31.82	123	174	298	0.583893	16	51	68	0.75	0.00805517	2	2	Polymorphism
Validated by duplicate and Illumina	IT_03	4	106196951	A	G	TET2	ENST00000380013	missense_variant	Ata/Gta|p.Ile1762Val/c.5284A>G	0	380	380	1	1	1	1	1	1	1	1	1	8	37.335	NO	COSM3760322	haematopoietic_and_lymphoid_tissue, prostate, thyroid	2, 5, 1	rs2454206	rs2454206	NO	0.272	NO	YES	0.041	Tolerated	0	29.81	0	199	199	1	0	181	181	1	1	14	14	Polymorphism
Validated by duplicate and Illumina	IT_04	4	106196951	A	G	TET2	ENST00000380013	missense_variant	Ata/Gta|p.Ile1762Val/c.5284A>G	2	553	556	0.994604	1	1	1	1	1	1	1	1	8	37.335	NO	COSM3760322	haematopoietic_and_lymphoid_tissue, prostate, thyroid	2, 5, 1	rs2454206	rs2454206	NO	0.272	NO	YES	0.041	Tolerated	19	29.73	1	285	287	0.993031	1	268	269	0.996283	1	14	14	Polymorphism
Validated by duplicate and Illumina	IT_07	4	106196951	A	G	TET2	ENST00000380013	missense_variant	Ata/Gta|p.Ile1762Val/c.5284A>G	4	1466	1471	0.996601	1	1	1	1	1	1	1	1	8	37.335	NO	COSM3760322	haematopoietic_and_lymphoid_tissue, prostate, thyroid	2, 5, 1	rs2454206	rs2454206	NO	0.272	NO	YES	0.041	Tolerated	23.75	29.01	1	612	614	0.996743	3	854	857	0.996499	0.644923	14	14	Polymorphism
Validated by duplicate and Illumina	IT_08	4	106196951	A	G	TET2	ENST00000380013	missense_variant	Ata/Gta|p.Ile1762Val/c.5284A>G	5	1257	1264	0.994462	1	1	1	1	1	1	1	1	8	37.335	NO	COSM3760322	haematopoietic_and_lymphoid_tissue, prostate, thyroid	2, 5, 1	rs2454206	rs2454206	NO	0.272	NO	YES	0.041	Tolerated	25.8	29.07	1	625	628	0.995223	4	632	636	0.993711	0.374086	14	14	Polymorphism
Validated by duplicate and Illumina	IT_11	4	106196951	A	G	TET2	ENST00000380013	missense_variant	Ata/Gta|p.Ile1762Val/c.5284A>G	1325	1295	2620	0.494275	1	1	1	1	1	1	1	1	8	37.335	NO	COSM3760322	haematopoietic_and_lymphoid_tissue, prostate, thyroid	2, 5, 1	rs2454206	rs2454206	NO	0.272	NO	YES	0.041	Tolerated	31.22	31.17	633	599	1232	0.486201	692	696	1388	0.501441	0.457032	14	14	Polymorphism
Validated by duplicate and Illumina	IT_12	4	106196951	A	G	TET2	ENST00000380013	missense_variant	Ata/Gta|p.Ile1762Val/c.5284A>G	1126	1133	2259	0.501549	1	1	1	1	1	1	1	1	8	37.335	NO	COSM3760322	haematopoietic_and_lymphoid_tissue, prostate, thyroid	2, 5, 1	rs2454206	rs2454206	NO	0.272	NO	YES	0.041	Tolerated	31.57	31.54	709	741	1450	0.511034	417	392	809	0.484549	0.236174	14	14	Polymorphism
Validated by duplicate and Illumina	IT_13	4	106196951	A	G	TET2	ENST00000380013	missense_variant	Ata/Gta|p.Ile1762Val/c.5284A>G	615	604	1219	0.495488	1	1	1	1	1	1	1	1	8	37.335	NO	COSM3760322	haematopoietic_and_lymphoid_tissue, prostate, thyroid	2, 5, 1	rs2454206	rs2454206	NO	0.272	NO	YES	0.041	Tolerated	30.2	30.31	272	294	566	0.519435	343	310	653	0.474732	0.121434	14	14	Polymorphism
Validated by duplicate and Illumina	IT_14	4	106196951	A	G	TET2	ENST00000380013	missense_variant	Ata/Gta|p.Ile1762Val/c.5284A>G	325	318	644	0.493789	1	1	1	1	1	1	1	1	8	37.335	NO	COSM3760322	haematopoietic_and_lymphoid_tissue, prostate, thyroid	2, 5, 1	rs2454206	rs2454206	NO	0.272	NO	YES	0.041	Tolerated	31.09	29.91	245	233	479	0.48643	80	85	165	0.515152	0.588105	14	14	Polymorphism
Validated by duplicate and Illumina	IT_15	4	106196951	A	G	TET2	ENST00000380013	missense_variant	Ata/Gta|p.Ile1762Val/c.5284A>G	8	1065	1076	0.989777	1	1	1	1	1	1	1	1	8	37.335	NO	COSM3760322	haematopoietic_and_lymphoid_tissue, prostate, thyroid	2, 5, 1	rs2454206	rs2454206	NO	0.272	NO	YES	0.041	Tolerated	15.75	28.72	2	481	483	0.995859	6	584	593	0.984823	0.306746	14	14	Polymorphism
Validated by duplicate and Illumina	IT_16	4	106196951	A	G	TET2	ENST00000380013	missense_variant	Ata/Gta|p.Ile1762Val/c.5284A>G	2	164	167	0.982036	1	1	1	1	1	1	1	1	8	37.335	NO	COSM3760322	haematopoietic_and_lymphoid_tissue, prostate, thyroid	2, 5, 1	rs2454206	rs2454206	NO	0.272	NO	YES	0.041	Tolerated	19	29.18	2	78	81	0.962963	0	86	86	1	0.230741	14	14	Polymorphism
Validated by duplicate and Illumina	IT_05	4	106196951	A	G	TET2	ENST00000380013	missense_variant	Ata/Gta|p.Ile1762Val/c.5284A>G	0	834	834	1	1	1	1	1	1	1	1	1	8	37.335	NO	COSM3760322	haematopoietic_and_lymphoid_tissue, prostate, thyroid	2, 5, 1	rs2454206	rs2454206	NO	0.272	NO	YES	0.041	Tolerated	0	29.4	0	355	355	1	0	479	479	1	1	14	14	Polymorphism
Validated by duplicate and Illumina	IT_06	4	106196951	A	G	TET2	ENST00000380013	missense_variant	Ata/Gta|p.Ile1762Val/c.5284A>G	2	1816	1819	0.998351	1	1	1	1	1	1	1	1	8	37.335	NO	COSM3760322	haematopoietic_and_lymphoid_tissue, prostate, thyroid	2, 5, 1	rs2454206	rs2454206	NO	0.272	NO	YES	0.041	Tolerated	13	29.62	1	907	908	0.998899	1	909	911	0.997805	1	14	14	Polymorphism
Validated by duplicate and Illumina	IT_17	4	106196951	A	G	TET2	ENST00000380013	missense_variant	Ata/Gta|p.Ile1762Val/c.5284A>G	6	1351	1358	0.994845	1	1	1	1	1	1	1	1	8	37.335	NO	COSM3760322	haematopoietic_and_lymphoid_tissue, prostate, thyroid	2, 5, 1	rs2454206	rs2454206	NO	0.272	NO	YES	0.041	Tolerated	16.5	29.48	0	650	650	1	6	701	708	0.990113	0.0317305	14	14	Polymorphism
Validated by duplicate and Illumina	IT_18	4	106196951	A	G	TET2	ENST00000380013	missense_variant	Ata/Gta|p.Ile1762Val/c.5284A>G	6	2041	2047	0.997069	1	1	1	1	1	1	1	1	8	37.335	NO	COSM3760322	haematopoietic_and_lymphoid_tissue, prostate, thyroid	2, 5, 1	rs2454206	rs2454206	NO	0.272	NO	YES	0.041	Tolerated	17.33	29.18	1	886	887	0.998873	5	1155	1160	0.99569	0.242962	14	14	Polymorphism
Validated by duplicate and Illumina	IT_23	4	106197000	A	G	TET2	ENST00000380013	missense_variant	cAt/cGt|p.His1778Arg/c.5333A>G	945	973	1927	0.50493	1	1	1	1	1	1	1	1	8	3.017	NO	NO	NO	O	rs62621450	rs62621450	NO	0.045	NO	YES	-1.986	Tolerated	29.23	27.8	426	418	847	0.493506	519	555	1080	0.513889	0.357766	3	3	Polymorphism
Validated by duplicate and Illumina	IT_24	4	106197000	A	G	TET2	ENST00000380013	missense_variant	cAt/cGt|p.His1778Arg/c.5333A>G	256	297	553	0.537071	1	1	1	1	1	1	1	1	8	3.017	NO	NO	NO	O	rs62621450	rs62621450	NO	0.045	NO	YES	-1.986	Tolerated	27.88	26.43	124	146	270	0.540741	132	151	283	0.533569	0.932028	3	3	Polymorphism
Validated by duplicate and Illumina	IT_23	17	7579472	G	C	TP53	ENST00000269305	missense_variant	cCc/cGc|p.Pro72Arg/c.215C>G	38	2055	2094	0.981375	1	1	1	1	1	1	1	1	8	25.4767	0.7147	COSM3766190, COSM3766191, COSM250061, COSM3766193, COSM3766192	large_intestine, liver, pancreas, pleura, prostate, soft_tissue, stomach, upper_aerodigestive_tract, urinary_tract, central_nervous_system	10, 5, 15, 5, 5, 100, 5, 7, 5, 1	rs1042522	rs1042522	NO	0.659	NO	YES	0.155	Tolerated	19.03	29.77	18	927	946	0.979915	20	1128	1148	0.982578	0.869696	24	24	Polymorphism
Validated by duplicate and Illumina	IT_24	17	7579472	G	C	TP53	ENST00000269305	missense_variant	cCc/cGc|p.Pro72Arg/c.215C>G	17	395	412	0.958738	1	1	1	1	1	1	1	1	8	25.4767	0.7147	COSM3766190, COSM3766191, COSM250061, COSM3766193, COSM3766192	large_intestine, liver, pancreas, pleura, prostate, soft_tissue, stomach, upper_aerodigestive_tract, urinary_tract, central_nervous_system	10, 5, 15, 5, 5, 100, 5, 7, 5, 1	rs1042522	rs1042522	NO	0.659	NO	YES	0.155	Tolerated	17.24	27.51	10	168	178	0.94382	7	227	234	0.970085	0.215625	24	24	Polymorphism
Validated by duplicate and Illumina	IT_01	17	7579472	G	C	TP53	ENST00000269305	missense_variant	cCc/cGc|p.Pro72Arg/c.215C>G	1018	892	1911	0.466771	1	1	1	1	1	1	1	1	8	25.4767	0.7147	COSM3766190, COSM3766191, COSM250061, COSM3766193, COSM3766192	large_intestine, liver, pancreas, pleura, prostate, soft_tissue, stomach, upper_aerodigestive_tract, urinary_tract, central_nervous_system	10, 5, 15, 5, 5, 100, 5, 7, 5, 1	rs1042522	rs1042522	NO	0.659	NO	YES	0.155	Tolerated	23.17	29.69	491	407	898	0.453229	527	485	1013	0.478776	0.270194	24	24	Polymorphism
Validated by duplicate and Illumina	IT_02	17	7579472	G	C	TP53	ENST00000269305	missense_variant	cCc/cGc|p.Pro72Arg/c.215C>G	257	248	505	0.491089	1	1	1	1	1	1	1	1	8	25.4767	0.7147	COSM3766190, COSM3766191, COSM250061, COSM3766193, COSM3766192	large_intestine, liver, pancreas, pleura, prostate, soft_tissue, stomach, upper_aerodigestive_tract, urinary_tract, central_nervous_system	10, 5, 15, 5, 5, 100, 5, 7, 5, 1	rs1042522	rs1042522	NO	0.659	NO	YES	0.155	Tolerated	22.36	30.18	101	108	209	0.516746	156	140	296	0.472973	0.366349	24	24	Polymorphism
Validated by duplicate and Illumina	IT_03	17	7579472	G	C	TP53	ENST00000269305	missense_variant	cCc/cGc|p.Pro72Arg/c.215C>G	6	482	489	0.985685	1	1	1	1	1	1	1	1	8	25.4767	0.7147	COSM3766190, COSM3766191, COSM250061, COSM3766193, COSM3766192	large_intestine, liver, pancreas, pleura, prostate, soft_tissue, stomach, upper_aerodigestive_tract, urinary_tract, central_nervous_system	10, 5, 15, 5, 5, 100, 5, 7, 5, 1	rs1042522	rs1042522	NO	0.659	NO	YES	0.155	Tolerated	23.83	30.7	1	184	186	0.989247	5	298	303	0.983498	0.41578	24	24	Polymorphism
Validated by duplicate and Illumina	IT_04	17	7579472	G	C	TP53	ENST00000269305	missense_variant	cCc/cGc|p.Pro72Arg/c.215C>G	6	481	488	0.985656	1	1	1	1	1	1	1	1	8	25.4767	0.7147	COSM3766190, COSM3766191, COSM250061, COSM3766193, COSM3766192	large_intestine, liver, pancreas, pleura, prostate, soft_tissue, stomach, upper_aerodigestive_tract, urinary_tract, central_nervous_system	10, 5, 15, 5, 5, 100, 5, 7, 5, 1	rs1042522	rs1042522	NO	0.659	NO	YES	0.155	Tolerated	23.5	30.36	3	190	193	0.984456	3	291	295	0.986441	0.685447	24	24	Polymorphism
Validated by duplicate and Illumina	IT_07	17	7579472	G	C	TP53	ENST00000269305	missense_variant	cCc/cGc|p.Pro72Arg/c.215C>G	22	990	1013	0.977295	1	1	1	1	1	1	1	1	8	25.4767	0.7147	COSM3766190, COSM3766191, COSM250061, COSM3766193, COSM3766192	large_intestine, liver, pancreas, pleura, prostate, soft_tissue, stomach, upper_aerodigestive_tract, urinary_tract, central_nervous_system	10, 5, 15, 5, 5, 100, 5, 7, 5, 1	rs1042522	rs1042522	NO	0.659	NO	YES	0.155	Tolerated	22.09	29.45	9	394	404	0.975248	13	596	609	0.978654	1	24	24	Polymorphism
Validated by duplicate and Illumina	IT_08	17	7579472	G	C	TP53	ENST00000269305	missense_variant	cCc/cGc|p.Pro72Arg/c.215C>G	22	854	876	0.974886	1	1	1	1	1	1	1	1	8	25.4767	0.7147	COSM3766190, COSM3766191, COSM250061, COSM3766193, COSM3766192	large_intestine, liver, pancreas, pleura, prostate, soft_tissue, stomach, upper_aerodigestive_tract, urinary_tract, central_nervous_system	10, 5, 15, 5, 5, 100, 5, 7, 5, 1	rs1042522	rs1042522	NO	0.659	NO	YES	0.155	Tolerated	23.18	29.29	10	387	397	0.974811	12	467	479	0.974948	1	24	24	Polymorphism
Validated by duplicate and Illumina	IT_09	17	7579472	G	C	TP53	ENST00000269305	missense_variant	cCc/cGc|p.Pro72Arg/c.215C>G	1086	954	2041	0.467418	1	1	1	1	1	1	1	1	8	25.4767	0.7147	COSM3766190, COSM3766191, COSM250061, COSM3766193, COSM3766192	large_intestine, liver, pancreas, pleura, prostate, soft_tissue, stomach, upper_aerodigestive_tract, urinary_tract, central_nervous_system	10, 5, 15, 5, 5, 100, 5, 7, 5, 1	rs1042522	rs1042522	NO	0.659	NO	YES	0.155	Tolerated	23.06	29.07	508	429	937	0.457844	578	525	1104	0.475543	0.4231	24	24	Polymorphism
Validated by duplicate and Illumina	IT_10	17	7579472	G	C	TP53	ENST00000269305	missense_variant	cCc/cGc|p.Pro72Arg/c.215C>G	777	777	1555	0.499678	1	1	1	1	1	1	1	1	8	25.4767	0.7147	COSM3766190, COSM3766191, COSM250061, COSM3766193, COSM3766192	large_intestine, liver, pancreas, pleura, prostate, soft_tissue, stomach, upper_aerodigestive_tract, urinary_tract, central_nervous_system	10, 5, 15, 5, 5, 100, 5, 7, 5, 1	rs1042522	rs1042522	NO	0.659	NO	YES	0.155	Tolerated	22.05	29.54	165	167	332	0.503012	612	610	1223	0.498774	0.950658	24	24	Polymorphism
Validated by duplicate and Illumina	IT_11	17	7579472	G	C	TP53	ENST00000269305	missense_variant	cCc/cGc|p.Pro72Arg/c.215C>G	1630	1568	3202	0.489694	1	1	1	1	1	1	1	0	7	25.4767	0.7147	COSM3766190, COSM3766191, COSM250061, COSM3766193, COSM3766192	large_intestine, liver, pancreas, pleura, prostate, soft_tissue, stomach, upper_aerodigestive_tract, urinary_tract, central_nervous_system	10, 5, 15, 5, 5, 100, 5, 7, 5, 1	rs1042522	rs1042522	NO	0.659	NO	YES	0.155	Tolerated	24.86	29.65	773	671	1445	0.46436	857	897	1757	0.510529	0.00856925	24	24	Polymorphism
Validated by duplicate and Illumina	IT_12	17	7579472	G	C	TP53	ENST00000269305	missense_variant	cCc/cGc|p.Pro72Arg/c.215C>G	1121	1095	2220	0.493243	1	1	1	1	1	1	1	1	8	25.4767	0.7147	COSM3766190, COSM3766191, COSM250061, COSM3766193, COSM3766192	large_intestine, liver, pancreas, pleura, prostate, soft_tissue, stomach, upper_aerodigestive_tract, urinary_tract, central_nervous_system	10, 5, 15, 5, 5, 100, 5, 7, 5, 1	rs1042522	rs1042522	NO	0.659	NO	YES	0.155	Tolerated	21.9	28.54	203	170	373	0.455764	918	925	1847	0.500812	0.111866	24	24	Polymorphism
Validated by duplicate and Illumina	IT_13	17	7579472	G	C	TP53	ENST00000269305	missense_variant	cCc/cGc|p.Pro72Arg/c.215C>G	24	1239	1266	0.978673	1	1	1	1	1	1	1	1	8	25.4767	0.7147	COSM3766190, COSM3766191, COSM250061, COSM3766193, COSM3766192	large_intestine, liver, pancreas, pleura, prostate, soft_tissue, stomach, upper_aerodigestive_tract, urinary_tract, central_nervous_system	10, 5, 15, 5, 5, 100, 5, 7, 5, 1	rs1042522	rs1042522	NO	0.659	NO	YES	0.155	Tolerated	17.08	27.04	20	528	549	0.961749	4	711	717	0.991632	8.11965e-05	24	24	Polymorphism
Validated by duplicate and Illumina	IT_14	17	7579472	G	C	TP53	ENST00000269305	missense_variant	cCc/cGc|p.Pro72Arg/c.215C>G	10	678	689	0.984035	1	1	1	1	1	1	1	1	8	25.4767	0.7147	COSM3766190, COSM3766191, COSM250061, COSM3766193, COSM3766192	large_intestine, liver, pancreas, pleura, prostate, soft_tissue, stomach, upper_aerodigestive_tract, urinary_tract, central_nervous_system	10, 5, 15, 5, 5, 100, 5, 7, 5, 1	rs1042522	rs1042522	NO	0.659	NO	YES	0.155	Tolerated	18.3	27.29	2	106	108	0.981481	8	572	581	0.984509	0.661281	24	24	Polymorphism
Validated by duplicate and Illumina	IT_15	17	7579472	G	C	TP53	ENST00000269305	missense_variant	cCc/cGc|p.Pro72Arg/c.215C>G	483	472	956	0.493724	1	1	1	1	1	1	1	1	8	25.4767	0.7147	COSM3766190, COSM3766191, COSM250061, COSM3766193, COSM3766192	large_intestine, liver, pancreas, pleura, prostate, soft_tissue, stomach, upper_aerodigestive_tract, urinary_tract, central_nervous_system	10, 5, 15, 5, 5, 100, 5, 7, 5, 1	rs1042522	rs1042522	NO	0.659	NO	YES	0.155	Tolerated	22.73	27.04	191	176	367	0.479564	292	296	589	0.502547	0.505942	24	24	Polymorphism
Validated by duplicate and Illumina	IT_16	17	7579472	G	C	TP53	ENST00000269305	missense_variant	cCc/cGc|p.Pro72Arg/c.215C>G	62	64	126	0.507937	1	1	1	1	1	1	1	1	8	25.4767	0.7147	COSM3766190, COSM3766191, COSM250061, COSM3766193, COSM3766192	large_intestine, liver, pancreas, pleura, prostate, soft_tissue, stomach, upper_aerodigestive_tract, urinary_tract, central_nervous_system	10, 5, 15, 5, 5, 100, 5, 7, 5, 1	rs1042522	rs1042522	NO	0.659	NO	YES	0.155	Tolerated	22.81	27.44	23	25	48	0.520833	39	39	78	0.5	0.855951	24	24	Polymorphism
Validated by duplicate and Illumina	IT_05	17	7579472	G	C	TP53	ENST00000269305	missense_variant	cCc/cGc|p.Pro72Arg/c.215C>G	29	2705	2735	0.989031	1	1	1	1	1	1	1	1	8	25.4767	0.7147	COSM3766190, COSM3766191, COSM250061, COSM3766193, COSM3766192	large_intestine, liver, pancreas, pleura, prostate, soft_tissue, stomach, upper_aerodigestive_tract, urinary_tract, central_nervous_system	10, 5, 15, 5, 5, 100, 5, 7, 5, 1	rs1042522	rs1042522	NO	0.659	NO	YES	0.155	Tolerated	21.62	29.91	18	1031	1049	0.982841	11	1674	1686	0.992883	0.0115498	24	24	Polymorphism
Validated by duplicate and Illumina	IT_06	17	7579472	G	C	TP53	ENST00000269305	missense_variant	cCc/cGc|p.Pro72Arg/c.215C>G	72	3062	3134	0.977026	1	1	1	1	1	1	1	1	8	25.4767	0.7147	COSM3766190, COSM3766191, COSM250061, COSM3766193, COSM3766192	large_intestine, liver, pancreas, pleura, prostate, soft_tissue, stomach, upper_aerodigestive_tract, urinary_tract, central_nervous_system	10, 5, 15, 5, 5, 100, 5, 7, 5, 1	rs1042522	rs1042522	NO	0.659	NO	YES	0.155	Tolerated	20.17	29.61	51	1344	1395	0.963441	21	1718	1739	0.987924	6.11628e-06	24	24	Polymorphism
Validated by duplicate and Illumina	IT_17	17	7579472	G	C	TP53	ENST00000269305	missense_variant	cCc/cGc|p.Pro72Arg/c.215C>G	732	612	1344	0.455357	1	1	1	1	1	1	1	1	8	25.4767	0.7147	COSM3766190, COSM3766191, COSM250061, COSM3766193, COSM3766192	large_intestine, liver, pancreas, pleura, prostate, soft_tissue, stomach, upper_aerodigestive_tract, urinary_tract, central_nervous_system	10, 5, 15, 5, 5, 100, 5, 7, 5, 1	rs1042522	rs1042522	NO	0.659	NO	YES	0.155	Tolerated	23.3	26.77	266	226	492	0.45935	466	386	852	0.453052	0.864587	24	24	Polymorphism
Validated by duplicate and Illumina	IT_18	17	7579472	G	C	TP53	ENST00000269305	missense_variant	cCc/cGc|p.Pro72Arg/c.215C>G	1228	1136	2364	0.480541	1	1	1	1	1	1	1	1	8	25.4767	0.7147	COSM3766190, COSM3766191, COSM250061, COSM3766193, COSM3766192	large_intestine, liver, pancreas, pleura, prostate, soft_tissue, stomach, upper_aerodigestive_tract, urinary_tract, central_nervous_system	10, 5, 15, 5, 5, 100, 5, 7, 5, 1	rs1042522	rs1042522	NO	0.659	NO	YES	0.155	Tolerated	25.07	27.66	487	437	924	0.472944	741	699	1440	0.485417	0.555156	24	24	Polymorphism
Validated by duplicate and Illumina	IT_19	17	7579472	G	C	TP53	ENST00000269305	missense_variant	cCc/cGc|p.Pro72Arg/c.215C>G	4266	4192	8464	0.495274	1	1	1	1	1	1	1	1	8	25.4767	0.7147	COSM3766190, COSM3766191, COSM250061, COSM3766193, COSM3766192	large_intestine, liver, pancreas, pleura, prostate, soft_tissue, stomach, upper_aerodigestive_tract, urinary_tract, central_nervous_system	10, 5, 15, 5, 5, 100, 5, 7, 5, 1	rs1042522	rs1042522	NO	0.659	NO	YES	0.155	Tolerated	24.1	27.44	1547	1400	2947	0.475059	2719	2792	5517	0.506072	0.00575851	24	24	Polymorphism
Validated by duplicate and Illumina	IT_20	17	7579472	G	C	TP53	ENST00000269305	missense_variant	cCc/cGc|p.Pro72Arg/c.215C>G	884	786	1670	0.470659	1	1	1	1	1	1	1	1	8	25.4767	0.7147	COSM3766190, COSM3766191, COSM250061, COSM3766193, COSM3766192	large_intestine, liver, pancreas, pleura, prostate, soft_tissue, stomach, upper_aerodigestive_tract, urinary_tract, central_nervous_system	10, 5, 15, 5, 5, 100, 5, 7, 5, 1	rs1042522	rs1042522	NO	0.659	NO	YES	0.155	Tolerated	21.4	26.61	320	262	582	0.450172	564	524	1088	0.481618	0.236732	24	24	Polymorphism
Validated by duplicate and Illumina	IT_21	17	7579472	G	C	TP53	ENST00000269305	missense_variant	cCc/cGc|p.Pro72Arg/c.215C>G	234	261	496	0.52621	1	1	1	1	1	1	1	1	8	25.4767	0.7147	COSM3766190, COSM3766191, COSM250061, COSM3766193, COSM3766192	large_intestine, liver, pancreas, pleura, prostate, soft_tissue, stomach, upper_aerodigestive_tract, urinary_tract, central_nervous_system	10, 5, 15, 5, 5, 100, 5, 7, 5, 1	rs1042522	rs1042522	NO	0.659	NO	YES	0.155	Tolerated	24.31	28.21	90	92	183	0.502732	144	169	313	0.539936	0.513501	24	24	Polymorphism
Validated by duplicate and Illumina	IT_22	17	7579472	G	C	TP53	ENST00000269305	missense_variant	cCc/cGc|p.Pro72Arg/c.215C>G	1675	1720	3397	0.506329	1	1	1	1	1	1	1	1	8	25.4767	0.7147	COSM3766190, COSM3766191, COSM250061, COSM3766193, COSM3766192	large_intestine, liver, pancreas, pleura, prostate, soft_tissue, stomach, upper_aerodigestive_tract, urinary_tract, central_nervous_system	10, 5, 15, 5, 5, 100, 5, 7, 5, 1	rs1042522	rs1042522	NO	0.659	NO	YES	0.155	Tolerated	24.54	28.22	717	733	1450	0.505517	958	987	1947	0.506934	0.917125	24	24	Polymorphism
Validated by duplicate	IT_23	19	33792729	G	A	CEBPA	ENST00000498907	missense_variant	Ccc/Tcc|p.Pro198Ser/c.592C>T	545	479	1034	0.46325	1	1	1	1	1	1	1	1	8	NO	NO	NO	NA	NA	NO	NO	NO	NO	NO	NO	0.22	Tolerated	18.85	30.12	506	278	784	0.354592	39	201	250	0.804	2.14312e-41	20	22	Polymorphism
Validated by duplicate	IT_24	19	33792729	G	A	CEBPA	ENST00000498907	missense_variant	Ccc/Tcc|p.Pro198Ser/c.592C>T	69	46	117	0.393162	1	1	1	1	1	1	1	1	8	NO	NO	NO	NA	NA	NO	NO	NO	NO	NO	NO	0.22	Tolerated	16.22	28.78	67	28	97	0.28866	2	18	20	0.9	5.93308e-07	20	22	Polymorphism
Validated by duplicate	IT_01	19	33792729	G	A	CEBPA	ENST00000498907	missense_variant	Ccc/Tcc|p.Pro198Ser/c.592C>T	743	450	1208	0.372517	1	1	1	1	1	1	1	1	8	NO	NO	NO	NA	NA	NO	NO	NO	NO	NO	NO	0.22	Tolerated	19.57	30.65	673	256	930	0.275269	70	194	278	0.697842	2.73827e-41	20	22	Polymorphism
Validated by duplicate	IT_02	19	33792729	G	A	CEBPA	ENST00000498907	missense_variant	Ccc/Tcc|p.Pro198Ser/c.592C>T	292	165	462	0.357143	1	1	1	1	1	1	1	0	7	NO	NO	NO	NA	NA	NO	NO	NO	NO	NO	NO	0.22	Tolerated	20.21	31.19	263	93	357	0.260504	29	72	105	0.685714	2.67971e-16	20	22	Polymorphism
Validated by duplicate	IT_07	19	33792729	G	A	CEBPA	ENST00000498907	missense_variant	Ccc/Tcc|p.Pro198Ser/c.592C>T	431	150	582	0.257732	1	1	1	1	1	1	0	0	6	NO	NO	NO	NA	NA	NO	NO	NO	NO	NO	NO	0.22	Tolerated	19.78	30.59	402	74	476	0.155462	29	76	106	0.716981	1.49271e-29	20	22	Polymorphism
Validated by duplicate	IT_08	19	33792729	G	A	CEBPA	ENST00000498907	missense_variant	Ccc/Tcc|p.Pro198Ser/c.592C>T	382	120	503	0.238569	0	1	1	1	1	1	0	1	6	NO	NO	NO	NA	NA	NO	NO	NO	NO	NO	NO	0.22	Tolerated	19.63	30.88	359	71	430	0.165116	23	49	73	0.671233	3.12515e-18	20	22	Polymorphism
Validated by duplicate	IT_09	19	33792729	G	A	CEBPA	ENST00000498907	missense_variant	Ccc/Tcc|p.Pro198Ser/c.592C>T	746	320	1067	0.299906	1	1	1	1	1	1	0	0	6	NO	NO	NO	NA	NA	NO	NO	NO	NO	NO	NO	0.22	Tolerated	18.78	31.05	683	171	854	0.200234	63	149	213	0.699531	6.13028e-43	20	22	Polymorphism
Validated by duplicate	IT_10	19	33792729	G	A	CEBPA	ENST00000498907	missense_variant	Ccc/Tcc|p.Pro198Ser/c.592C>T	928	309	1243	0.248592	1	1	1	1	1	1	0	1	7	NO	NO	NO	NA	NA	NO	NO	NO	NO	NO	NO	0.22	Tolerated	20.19	30.61	872	166	1038	0.159923	56	143	205	0.697561	2.92738e-54	20	22	Polymorphism
Manual inspection; IGV, expert	IT_11	19	33792729	G	A	CEBPA	ENST00000498907	missense_variant	Ccc/Tcc|p.Pro198Ser/c.592C>T	680	269	959	0.280501	1	0	1	1	1	1	0	1	6	NO	NO	NO	NA	NA	NO	NO	NO	NO	NO	NO	0.22	Tolerated	22.08	29.24	648	128	776	0.164948	32	141	183	0.770492	1.61976e-60	20	22	Polymorphism
Validated by duplicate	IT_13	19	33792729	G	A	CEBPA	ENST00000498907	missense_variant	Ccc/Tcc|p.Pro198Ser/c.592C>T	377	219	601	0.364393	1	1	1	1	1	1	1	1	8	NO	NO	NO	NA	NA	NO	NO	NO	NO	NO	NO	0.22	Tolerated	20.45	27.99	314	132	446	0.295964	63	87	155	0.56129	8.46e-10	20	22	Polymorphism
Validated by duplicate	IT_14	19	33792729	G	A	CEBPA	ENST00000498907	missense_variant	Ccc/Tcc|p.Pro198Ser/c.592C>T	287	161	452	0.356195	1	0	1	1	1	1	0	0	5	NO	NO	NO	NA	NA	NO	NO	NO	NO	NO	NO	0.22	Tolerated	22.74	27.61	256	90	346	0.260116	31	71	106	0.669811	2.57607e-15	20	22	Polymorphism
Manual inspection; IGV, expert	IT_15	19	33792729	G	A	CEBPA	ENST00000498907	missense_variant	Ccc/Tcc|p.Pro198Ser/c.592C>T	200	67	267	0.250936	0	0	0	1	1	1	0	1	4	NO	NO	NO	NA	NA	NO	NO	NO	NO	NO	NO	0.22	Tolerated	22.11	27.91	186	37	223	0.165919	14	30	44	0.681818	2.50867e-11	20	22	Polymorphism
Manual inspection; IGV, expert	IT_17	19	33792729	G	A	CEBPA	ENST00000498907	missense_variant	Ccc/Tcc|p.Pro198Ser/c.592C>T	799	208	1016	0.204724	0	1	0	1	1	1	0	1	5	NO	NO	NO	NA	NA	NO	NO	NO	NO	NO	NO	0.22	Tolerated	20.53	30.28	743	137	883	0.155153	56	71	133	0.533835	2.24846e-21	20	22	Polymorphism
Validated by duplicate and Illumina	IT_23	20	31022959	T	C	ASXL1	ENST00000375687	missense_variant	cTg/cCg|p.Leu815Pro/c.2444T>C	1	2276	2287	0.99519	1	1	1	1	1	1	1	1	8	0	1	NO	NO	O	rs6058694	rs6058694	NO	1	NO	NO	1.033	Tolerated	18	28.51	0	956	964	0.991701	1	1320	1323	0.997732	1	24	24	Polymorphism
Validated by duplicate and Illumina	IT_24	20	31022959	T	C	ASXL1	ENST00000375687	missense_variant	cTg/cCg|p.Leu815Pro/c.2444T>C	0	989	995	0.99397	1	1	1	0	1	1	1	1	7	0	1	NO	NO	O	rs6058694	rs6058694	NO	1	NO	NO	1.033	Tolerated	0	27.05	0	460	461	0.997831	0	529	534	0.990637	1	24	24	Polymorphism
Validated by duplicate and Illumina	IT_01	20	31022959	T	C	ASXL1	ENST00000375687	missense_variant	cTg/cCg|p.Leu815Pro/c.2444T>C	4	2571	2582	0.99574	1	1	1	1	1	1	1	1	8	0	1	NO	NO	O	rs6058694	rs6058694	NO	1	NO	NO	1.033	Tolerated	28.5	28.19	2	1031	1036	0.995174	2	1540	1546	0.996119	1	24	24	Polymorphism
Validated by duplicate and Illumina	IT_02	20	31022959	T	C	ASXL1	ENST00000375687	missense_variant	cTg/cCg|p.Leu815Pro/c.2444T>C	0	898	899	0.998888	1	1	1	1	1	1	1	1	8	0	1	NO	NO	O	rs6058694	rs6058694	NO	1	NO	NO	1.033	Tolerated	0	28.42	0	423	423	1	0	475	476	0.997899	1	24	24	Polymorphism
Validated by duplicate and Illumina	IT_03	20	31022959	T	C	ASXL1	ENST00000375687	missense_variant	cTg/cCg|p.Leu815Pro/c.2444T>C	0	408	410	0.995122	1	1	1	1	1	1	1	1	8	0	1	NO	NO	O	rs6058694	rs6058694	NO	1	NO	NO	1.033	Tolerated	0	28.32	0	186	186	1	0	222	224	0.991071	1	24	24	Polymorphism
Validated by duplicate and Illumina	IT_04	20	31022959	T	C	ASXL1	ENST00000375687	missense_variant	cTg/cCg|p.Leu815Pro/c.2444T>C	0	534	535	0.998131	1	1	1	1	1	1	1	1	8	0	1	NO	NO	O	rs6058694	rs6058694	NO	1	NO	NO	1.033	Tolerated	0	28.42	0	242	242	1	0	292	293	0.996587	1	24	24	Polymorphism
Validated by duplicate and Illumina	IT_07	20	31022959	T	C	ASXL1	ENST00000375687	missense_variant	cTg/cCg|p.Leu815Pro/c.2444T>C	6	2096	2108	0.994307	1	1	1	1	1	1	1	1	8	0	1	NO	NO	O	rs6058694	rs6058694	NO	1	NO	NO	1.033	Tolerated	28.17	28.45	1	831	835	0.99521	5	1265	1273	0.993716	0.412611	24	24	Polymorphism
Validated by duplicate and Illumina	IT_08	20	31022959	T	C	ASXL1	ENST00000375687	missense_variant	cTg/cCg|p.Leu815Pro/c.2444T>C	3	2264	2271	0.996918	1	1	1	1	1	1	1	1	8	0	1	NO	NO	O	rs6058694	rs6058694	NO	1	NO	NO	1.033	Tolerated	31.33	28.77	1	934	938	0.995736	2	1330	1333	0.997749	1	24	24	Polymorphism
Validated by duplicate and Illumina	IT_09	20	31022959	T	C	ASXL1	ENST00000375687	missense_variant	cTg/cCg|p.Leu815Pro/c.2444T>C	0	2273	2280	0.99693	1	1	1	1	1	1	1	1	8	0	1	NO	NO	O	rs6058694	rs6058694	NO	1	NO	NO	1.033	Tolerated	0	28.15	0	954	959	0.994786	0	1319	1321	0.998486	1	24	24	Polymorphism
Validated by duplicate and Illumina	IT_10	20	31022959	T	C	ASXL1	ENST00000375687	missense_variant	cTg/cCg|p.Leu815Pro/c.2444T>C	5	1861	1871	0.994655	1	1	1	1	1	1	1	1	8	0	1	NO	NO	O	rs6058694	rs6058694	NO	1	NO	NO	1.033	Tolerated	28.4	27.95	3	858	865	0.991908	2	1003	1006	0.997018	0.666978	24	24	Polymorphism
Validated by duplicate and Illumina	IT_11	20	31022959	T	C	ASXL1	ENST00000375687	missense_variant	cTg/cCg|p.Leu815Pro/c.2444T>C	1	689	692	0.995665	1	1	1	1	1	1	1	1	8	0	1	NO	NO	O	rs6058694	rs6058694	NO	1	NO	NO	1.033	Tolerated	35	30.54	0	257	258	0.996124	1	432	434	0.995392	1	24	24	Polymorphism
Validated by duplicate and Illumina	IT_12	20	31022959	T	C	ASXL1	ENST00000375687	missense_variant	cTg/cCg|p.Leu815Pro/c.2444T>C	2	1616	1618	0.998764	1	1	1	1	1	1	1	1	8	0	1	NO	NO	O	rs6058694	rs6058694	NO	1	NO	NO	1.033	Tolerated	30	29.73	1	742	743	0.998654	1	874	875	0.998857	1	24	24	Polymorphism
Validated by duplicate and Illumina	IT_13	20	31022959	T	C	ASXL1	ENST00000375687	missense_variant	cTg/cCg|p.Leu815Pro/c.2444T>C	1	966	968	0.997934	1	1	1	1	1	1	1	1	8	0	1	NO	NO	O	rs6058694	rs6058694	NO	1	NO	NO	1.033	Tolerated	35	29.86	0	410	410	1	1	556	558	0.996416	1	24	24	Polymorphism
Validated by duplicate and Illumina	IT_14	20	31022959	T	C	ASXL1	ENST00000375687	missense_variant	cTg/cCg|p.Leu815Pro/c.2444T>C	1	1361	1362	0.999266	1	1	1	1	1	1	1	1	8	0	1	NO	NO	O	rs6058694	rs6058694	NO	1	NO	NO	1.033	Tolerated	35	29.26	0	652	652	1	1	709	710	0.998592	1	24	24	Polymorphism
Validated by duplicate and Illumina	IT_15	20	31022959	T	C	ASXL1	ENST00000375687	missense_variant	cTg/cCg|p.Leu815Pro/c.2444T>C	9	3374	3401	0.992061	1	1	1	1	1	1	1	1	8	0	1	NO	NO	O	rs6058694	rs6058694	NO	1	NO	NO	1.033	Tolerated	24.22	27.68	1	1450	1456	0.995879	8	1924	1945	0.989203	0.0874545	24	24	Polymorphism
Validated by duplicate and Illumina	IT_16	20	31022959	T	C	ASXL1	ENST00000375687	missense_variant	cTg/cCg|p.Leu815Pro/c.2444T>C	2	2840	2853	0.995443	1	1	1	1	1	1	1	1	8	0	1	NO	NO	O	rs6058694	rs6058694	NO	1	NO	NO	1.033	Tolerated	35	28.7	1	984	987	0.99696	1	1856	1866	0.994641	1	24	24	Polymorphism
Validated by duplicate and Illumina	IT_05	20	31022959	T	C	ASXL1	ENST00000375687	missense_variant	cTg/cCg|p.Leu815Pro/c.2444T>C	2	3611	3617	0.998341	1	1	1	1	1	1	1	1	8	0	1	NO	NO	O	rs6058694	rs6058694	NO	1	NO	NO	1.033	Tolerated	33	28.79	1	1341	1344	0.997768	1	2270	2273	0.99868	1	24	24	Polymorphism
Validated by duplicate and Illumina	IT_06	20	31022959	T	C	ASXL1	ENST00000375687	missense_variant	cTg/cCg|p.Leu815Pro/c.2444T>C	2	2745	2750	0.998182	1	1	1	1	1	1	1	1	8	0	1	NO	NO	O	rs6058694	rs6058694	NO	1	NO	NO	1.033	Tolerated	19	28.44	1	1100	1103	0.99728	1	1645	1647	0.998786	1	24	24	Polymorphism
Validated by duplicate and Illumina	IT_17	20	31022959	T	C	ASXL1	ENST00000375687	missense_variant	cTg/cCg|p.Leu815Pro/c.2444T>C	0	1213	1225	0.990204	1	1	1	1	1	1	1	1	8	0	1	NO	NO	O	rs6058694	rs6058694	NO	1	NO	NO	1.033	Tolerated	0	27.8	0	560	569	0.984183	0	653	656	0.995427	1	24	24	Polymorphism
Validated by duplicate and Illumina	IT_18	20	31022959	T	C	ASXL1	ENST00000375687	missense_variant	cTg/cCg|p.Leu815Pro/c.2444T>C	0	725	729	0.994513	1	1	1	1	1	1	1	1	8	0	1	NO	NO	O	rs6058694	rs6058694	NO	1	NO	NO	1.033	Tolerated	0	28.43	0	238	241	0.987552	0	487	488	0.997951	1	24	24	Polymorphism
Validated by duplicate and Illumina	IT_19	20	31022959	T	C	ASXL1	ENST00000375687	missense_variant	cTg/cCg|p.Leu815Pro/c.2444T>C	9	8650	8684	0.996085	1	1	1	1	1	1	1	1	8	0	1	NO	NO	O	rs6058694	rs6058694	NO	1	NO	NO	1.033	Tolerated	29.33	30.93	3	2515	2530	0.994071	6	6135	6154	0.996913	0.725194	24	24	Polymorphism
Validated by duplicate and Illumina	IT_20	20	31022959	T	C	ASXL1	ENST00000375687	missense_variant	cTg/cCg|p.Leu815Pro/c.2444T>C	1	1286	1290	0.996899	1	1	1	1	1	1	1	1	8	0	1	NO	NO	O	rs6058694	rs6058694	NO	1	NO	NO	1.033	Tolerated	33	29.96	0	483	484	0.997934	1	803	806	0.996278	1	24	24	Polymorphism
Validated by duplicate and Illumina	IT_21	20	31022959	T	C	ASXL1	ENST00000375687	missense_variant	cTg/cCg|p.Leu815Pro/c.2444T>C	1	3514	3525	0.996879	1	1	1	1	1	1	1	1	8	0	1	NO	NO	O	rs6058694	rs6058694	NO	1	NO	NO	1.033	Tolerated	29	29.52	1	1428	1436	0.994429	0	2086	2089	0.998564	0.406543	24	24	Polymorphism
Validated by duplicate and Illumina	IT_22	20	31022959	T	C	ASXL1	ENST00000375687	missense_variant	cTg/cCg|p.Leu815Pro/c.2444T>C	2	3506	3518	0.996589	1	1	1	1	1	1	1	1	8	0	1	NO	NO	O	rs6058694	rs6058694	NO	1	NO	NO	1.033	Tolerated	34.5	31.05	1	1252	1257	0.996022	1	2254	2261	0.996904	1	24	24	Polymorphism
														96	97	97	98	104	100	91	94

## Sheet: FN Mutations
True because...	Sample	Chr	Pos	Ref	Alt	Gene	ENST	Type	Mutation	Nr_Ref	Nr_Alt	DP	VAF	GATK	Platypus	VarScan	LoFreq	FreeBayes	SNVer	SAMtools	VarDict	Called	ESP6500	G1000	Cosmic	Cosmic_location	Cosmic_occurence	dbSNP_SNPs	dbSNP_SNVs	PM_flag	ExAC	ClinVar_clinical	ClinVar_noimpact	provean_score	prediction	BQ_Ref	BQ_Alt	Nr_Ref_fwd	Nr_Alt_fwd	DP_fwd	VAF_fwd	Nr_Ref_rev	Nr_Alt_rev	DP_rev	VAF_rev	strandbias	nr_samples	nr_samples_similar	Category
Expert, bq	IT_21	17	7577132	C	A	TP53	ENST00000269305	missense_variant	aGc/aTc|p.Ser269Ile/c.806G>T	1391	969	2365	0.409725	1	1	1	1	1	1	1	1	8	NA	NA	NA	NA	NA	NA	NA	NA	NA	NA	NA	NA	NA	33.04	23.32	664	432	1098	0.393443	727	537	1267	0.423836
Expert, bq	IT_22	17	7577132	C	A	TP53	ENST00000455263	missense_variant	aGc/aTc|p.Ser269Ile/c.806G>T	1609	1160	2770	0.418773	1	1	1	1	1	1	1	1	8	NA	NA	NA	NA	NA	NA	NA	NA	NA	NA	NA	NA	NA	32.96	23.3	808	560	1368	0.409357	801	600	1402	0.42796
Hotspot, Expert, bq	IT_13	20	31022402	TCACCACTGCCATAGAGAGGCGGC	T	ASXL1	ENST00000375687	frameshift_variant	agagaggcggccaccactgccatc/|p.Glu635fs/c.1900_1922delAGAGAGGCGGCCACCACTGCCAT
Hotspot, Expert, bq	IT_14	20	31022402	TCACCACTGCCATAGAGAGGCGGC	T	ASXL1	ENST00000375687	frameshift_variant	agagaggcggccaccactgccatc/|p.Glu635fs/c.1900_1922delAGAGAGGCGGCCACCACTGCCAT
Validated with independent analysis	IT_17	20	31022436	ATCGGAG	TC	ASXL1	ENST00000375687	frameshift_variant+missense_variant	atcggaggg/TCgg|p.Ile641fs/c.1921_1927delATCGGAGinsTC	516	299	772	0.387306	0	0	0	0	0	0	0	1	1	NO	NO	NO	NA	NA	NO	NO	NO	NO	NO	NO	NA	NA	26.73	ComplexIndel	NA	NA	NA	NA	NA	NA	NA	NA	NA	4	31	Artifact (4)
Validated with independent analysis	IT_18	20	31022436	ATCGGAG	TC	ASXL1	ENST00000375687	frameshift_variant+missense_variant	atcggaggg/TCgg|p.Ile641fs/c.1921_1927delATCGGAGinsTC	656	245	842	0.290974	0	0	0	0	0	0	0	1	1	NO	NO	NO	NA	NA	NO	NO	NO	NO	NO	NO	NA	NA	26.7714	ComplexIndel	NA	NA	NA	NA	NA	NA	NA	NA	NA	4	31	Artifact (4)
Validated with independent analysis	IT_17	20	31022438	CGGAG	C	ASXL1	ENST00000375687	frameshift_variant	ggaggg/|p.Gly644fs/c.1926_1929delAGGG	776	179	1066	0.167917	1	1	0	0	0	1	0	0	3	NO	NO	NO	NA	NA	NO	NO	NO	NO	NO	NO	NA	NA	29.05	NA	714	146	935	0.15615	62	33	131	0.251908	8.31136e-05	2	5	Artifact (1)
Validated with independent analysis	IT_18	20	31022438	CGGAG	C	ASXL1	ENST00000375687	frameshift_variant	ggaggg/|p.Gly644fs/c.1926_1929delAGGG	843	142	1072	0.132463	1	1	0	0	0	1	0	0	3	NO	NO	NO	NA	NA	NO	NO	NO	NO	NO	NO	NA	NA	28.83	NA	782	120	948	0.126582	61	22	124	0.177419	0.00275611	2	5	Artifact (1)
Hotspot, Expert, bq; polyG → problematic for IonT	IT_01	20	31022441	A	AG	ASXL1	ENST00000375687	frameshift_variant	ggt/ggGt|p.Gly646fs/c.1934dupG
Hotspot, Expert, bq; polyG → problematic for IonT	IT_02	20	31022441	A	AG	ASXL1	ENST00000375687	frameshift_variant	ggt/ggGt|p.Gly646fs/c.1934dupG
Hotspot, Expert, bq; polyG → problematic for IonT	IT_11	20	31022441	A	AG	ASXL1	ENST00000375687	frameshift_variant	ggt/ggGt|p.Gly646fs/c.1934dupG	2060	513	2079	0.246753	0	1	1	0	1	1	0	1	5	NO	NO	NO	NA	NA	NO	NO	NO	NO	NO	NO	NA	NA	24.72	NA	1797	508	1814	0.280044	263	5	265	0.0188679	1.09268e-20	19	61	Artifact (0)
Hotspot, Expert, bq; polyG → problematic for IonT	IT_12	20	31022441	A	AG	ASXL1	ENST00000375687	frameshift_variant	ggt/ggGt|p.Gly646fs/c.1934dupG	3205	855	3232	0.264542	0	1	1	0	1	1	0	1	5	NO	NO	NO	NA	NA	NO	NO	NO	NO	NO	NO	NA	NA	24.63	NA	2737	854	2760	0.30942	468	1	472	0.00211864	6.763e-50	19	61	Artifact (0)
Validated with independent analysis; polyG → problematic for IonT	IT_13	20	31022441	A	AG	ASXL1	ENST00000375687	frameshift_variant	ggt/ggGt|p.Gly646fs/c.1934dupG	1160	152	1166	0.13036	0	0	0	0	1	1	0	1	3	NO	NO	NO	NA	NA	NO	NO	NO	NO	NO	NO	NA	NA	26.61	NA	1079	152	1085	0.140092	81	0	81	0	4.88037e-05	19	61	Artifact (2)
Validated with independent analysis; polyG → problematic for IonT	IT_14	20	31022441	A	AG	ASXL1	ENST00000375687	frameshift_variant	ggt/ggGt|p.Gly646fs/c.1934dupG	2376	323	2392	0.135033	0	0	0	0	1	1	0	1	3	NO	NO	NO	NA	NA	NO	NO	NO	NO	NO	NO	NA	NA	25.68	NA	2071	323	2083	0.155065	305	0	309	0	1.59686e-18	19	61	Artifact (2)
														4	6	4	2	6	8	2	8

## Sheet: FN Polymorphisms
Polymorphisms because...	Sample	Chr	Pos	Ref	Alt	Gene	ENST	Type	Mutation	Nr_Ref	Nr_Alt	DP	VAF	GATK	Platypus	VarScan	LoFreq	FreeBayes	SNVer	SAMtools	VarDict	Called	ESP6500	G1000	Cosmic	Cosmic_location	Cosmic_occurence	dbSNP_SNPs	dbSNP_SNVs	PM_flag	ExAC	ClinVar_clinical	ClinVar_noimpact	provean_score	prediction	BQ_Ref	BQ_Alt	Nr_Ref_fwd	Nr_Alt_fwd	DP_fwd	VAF_fwd	Nr_Ref_rev	Nr_Alt_rev	DP_rev	VAF_rev	strandbias	nr_samples	nr_samples_similar	Category
Validated with independent analysis	IT_21	19	33792731	G	GGCGGGT	CEBPA	ENST00000498907	inframe_insertion	ccg/cACCCGCcg|p.His195_Pro196dup/c.584_589dupACCCGC	777	202	778	0.25964	1	0	1	0	1	1	0	1	5	NO	NO	NO	NA	NA	NO	NO	NO	NO	NO	NO	-0.291	Tolerated	31.41	NA	702	202	702	0.287749	75	0	76	0	2.00086e-08	2	2	Artifact (0)
Validated with independent analysis	IT_22	19	33792731	G	GGCGGGT	CEBPA	ENST00000498907	inframe_insertion	ccg/cACCCGCcg|p.His195_Pro196dup/c.584_589dupACCCGC	140	23	141	0.163121	1	0	0	0	1	1	1	1	5	NO	NO	NO	NA	NA	NO	NO	NO	NO	NO	NO	-0.291	Tolerated	30.18	NA	115	23	116	0.198276	25	0	25	0	0.0263193	2	2	Artifact (0)
														2	0	1	0	2	2	1	2

## Sheet: FP Mutations
Artifact because...	Sample	Chr	Pos	Ref	Alt	Gene	ENST	Type	Mutation	Nr_Ref	Nr_Alt	DP	VAF	GATK	Platypus	VarScan	LoFreq	FreeBayes	SNVer	SAMtools	VarDict	Called	ESP6500	G1000	Cosmic	Cosmic_location	Cosmic_occurence	dbSNP_SNPs	dbSNP_SNVs	PM_flag	ExAC	ClinVar_clinical	ClinVar_noimpact	provean_score	prediction	BQ_Ref	BQ_Alt	Nr_Ref_fwd	Nr_Alt_fwd	DP_fwd	VAF_fwd	Nr_Ref_rev	Nr_Alt_rev	DP_rev	VAF_rev	strandbias	nr_samples	nr_samples_similar	Category
only in 1 sample; not in duplicate; not in Illumina data	IT_23	13	28592641	T	G	FLT3	ENST00000241453	missense_variant	gAt/gCt|p.Asp835Ala/c.2504A>C	1977	31	2052	0.0151072	0	0	0	0	1	0	0	1	2	NO	NO	COSM27650	haematopoietic_and_lymphoid_tissue	3	NO	NO	NO	NO	NO	NO	-6.981	Deleterious	29.65	28.87	997	14	1032	0.0135659	980	17	1020	0.0166667	0.59146	2	4	Hotspot (-2)
only in 1 sample; not in duplicate; not in Illumina data	IT_23	13	28592641	T	A	FLT3	ENST00000241453	missense_variant	gAt/gTt|p.Asp835Val/c.2504A>T	1977	41	2052	0.0199805	0	0	0	1	1	0	0	1	3	NO	NO	COSM784	haematopoietic_and_lymphoid_tissue	51	NO	NO	NO	NO	NO	NO	-7.907	Deleterious	29.65	25.83	997	21	1032	0.0203488	980	20	1020	0.0196078	1	2	4	Hotspot (-5)
only in 1 sample; not in duplicate; not in Illumina data	IT_10	1	115258748	C	T	NRAS	ENST00000369535	missense_variant	Ggt/Agt|p.Gly12Ser/c.34G>A	1568	22	1590	0.0138365	0	0	0	0	1	0	0	0	1	NO	NO	COSM563	haematopoietic_and_lymphoid_tissue, large_intestine, lung, ovary, prostate, skin, soft_tissue, upper_aerodigestive_tract	110, 6, 3, 1, 6, 13, 1, 21	NO	rs121913250	YES	NO	NO	NO	-4.621	Deleterious	27	24.18	673	10	683	0.0146413	895	12	907	0.0132304	0.831134	3	3	Hotspot (-1)
														0	0	0	1	3	0	0	2

## Sheet: FP Polymorphisms
Artifact because...	Sample	Chr	Pos	Ref	Alt	Gene	ENST	Type	Mutation	Nr_Ref	Nr_Alt	DP	VAF	GATK	Platypus	VarScan	LoFreq	FreeBayes	SNVer	SAMtools	VarDict	Called	ESP6500	G1000	Cosmic	Cosmic_location	Cosmic_occurence	dbSNP_SNPs	dbSNP_SNVs	PM_flag	ExAC	ClinVar_clinical	ClinVar_noimpact	provean_score	prediction	BQ_Ref	BQ_Alt	Nr_Ref_fwd	Nr_Alt_fwd	DP_fwd	VAF_fwd	Nr_Ref_rev	Nr_Alt_rev	DP_rev	VAF_rev	strandbias	nr_samples	nr_samples_similar	Category

## Sheet: TN Mutations Filter 2
Sample	Chr	Pos	Ref	Alt	Gene	ENST	Type	Mutation	Nr_Ref	Nr_Alt	DP	VAF	GATK	Platypus	VarScan	LoFreq	FreeBayes	SNVer	SAMtools	VarDict	Called	ESP6500	G1000	Cosmic	Cosmic_location	Cosmic_occurence	dbSNP_SNPs	dbSNP_SNVs	PM_flag	ExAC	ClinVar_clinical	ClinVar_noimpact	provean_score	prediction	BQ_Ref	BQ_Alt	Nr_Ref_fwd	Nr_Alt_fwd	DP_fwd	VAF_fwd	Nr_Ref_rev	Nr_Alt_rev	DP_rev	VAF_rev	strandbias	nr_samples	nr_samples_similar	Category
IT_15	1	115256440	CA	C	NRAS	ENST00000369535	frameshift_variant	ttt/|p.Phe90fs/c.269delT	5045	68	5118	0.0132864	0	0	0	0	1	0	0	0	1	NO	NO	NO	NO	O	NO	NO	NO	NO	NO	NO	NA	NA	26.73	NA	2722	62	2789	0.0222302	2323	6	2329	0.00257621	4.58828e-11	6	6	Artifact (8)
IT_16	1	115256440	CA	C	NRAS	ENST00000369535	frameshift_variant	ttt/|p.Phe90fs/c.269delT	3636	46	3684	0.0124864	0	0	0	0	1	0	0	0	1	NO	NO	NO	NO	O	NO	NO	NO	NO	NO	NO	NA	NA	27.58	NA	2183	44	2229	0.0197398	1453	2	1455	0.00137457	5.06904e-08	6	6	Artifact (8)
IT_17	1	115256440	CA	C	NRAS	ENST00000369535	frameshift_variant	ttt/|p.Phe90fs/c.269delT	1304	36	1343	0.0268057	0	0	0	0	1	0	0	0	1	NO	NO	NO	NO	O	NO	NO	NO	NO	NO	NO	NA	NA	26.82	NA	690	33	725	0.0455172	614	3	618	0.00485437	1.36708e-06	6	6	Artifact (6)
IT_19	1	115256440	CA	C	NRAS	ENST00000369535	frameshift_variant	ttt/|p.Phe90fs/c.269delT	2562	36	2603	0.0138302	0	0	0	0	1	0	0	0	1	NO	NO	NO	NO	O	NO	NO	NO	NO	NO	NO	NA	NA	28.15	NA	1591	35	1631	0.0214592	971	1	972	0.00102881	1.72867e-06	6	6	Artifact (8)
IT_24	1	115256461	TG	T	NRAS	ENST00000369535	frameshift_variant	gcc/|p.Ile84fs/c.248delC	1005	25	1030	0.0242718	0	0	0	0	1	0	0	0	1	NO	NO	NO	NO	O	NO	NO	NO	NO	NO	NO	NA	NA	24.59	NA	577	25	602	0.0415282	428	0	428	0	1.32857e-06	4	4	Artifact (6)
IT_15	1	115256461	TG	T	NRAS	ENST00000369535	frameshift_variant	gcc/|p.Ile84fs/c.248delC	5044	83	5130	0.0161793	0	0	0	0	1	0	0	0	1	NO	NO	NO	NO	O	NO	NO	NO	NO	NO	NO	NA	NA	26.52	NA	2696	79	2776	0.0284582	2348	4	2354	0.00169924	5.51762e-17	4	4	Artifact (8)
IT_16	1	115256461	TG	T	NRAS	ENST00000369535	frameshift_variant	gcc/|p.Ile84fs/c.248delC	3637	48	3688	0.0130152	0	0	0	0	1	0	0	0	1	NO	NO	NO	NO	O	NO	NO	NO	NO	NO	NO	NA	NA	26.87	NA	2175	46	2223	0.0206928	1462	2	1465	0.00136519	1.61906e-08	4	4	Artifact (8)
IT_24	1	115256479	AG	A	NRAS	ENST00000369535	frameshift_variant	ggc/|p.Phe78fs/c.231delC	1320	30	1354	0.0221566	0	0	0	0	1	0	0	0	1	NO	NO	NO	NO	O	NO	NO	NO	NO	NO	NO	NA	NA	26.19	NA	829	30	863	0.0347625	491	0	491	0	2.06271e-06	2	2	Artifact (4)
IT_15	1	115256479	AG	A	NRAS	ENST00000369535	frameshift_variant	ggc/|p.Phe78fs/c.231delC	6889	71	6971	0.0101851	0	0	0	0	1	0	0	0	1	NO	NO	NO	NO	O	NO	NO	NO	NO	NO	NO	NA	NA	27.65	NA	3560	71	3640	0.0195055	3329	0	3331	0	7.1903e-21	2	2	Artifact (6)
IT_23	1	115256484	T	C	NRAS	ENST00000369535	missense_variant	gAa/gGa|p.Glu76Gly/c.227A>G	2587	132	2767	0.0477051	0	0	0	0	1	0	0	0	1	NO	NO	NO	NO	O	NO	NO	NO	NO	NO	NO	-6.085	Deleterious	25.36	20.64	1571	131	1750	0.0748571	1016	1	1017	0.000983284	2.55867e-26	22	22	Artifact (7)
IT_01	1	115256484	T	C	NRAS	ENST00000369535	missense_variant	gAa/gGa|p.Glu76Gly/c.227A>G	2260	92	2370	0.0388186	0	0	0	0	1	0	0	0	1	NO	NO	NO	NO	O	NO	NO	NO	NO	NO	NO	-6.085	Deleterious	24.82	19.59	1252	89	1359	0.0654893	1008	3	1011	0.00296736	1.12347e-18	22	22	Artifact (7)
IT_02	1	115256484	T	C	NRAS	ENST00000369535	missense_variant	gAa/gGa|p.Glu76Gly/c.227A>G	1363	26	1392	0.0186782	0	0	0	0	1	0	0	0	1	NO	NO	NO	NO	O	NO	NO	NO	NO	NO	NO	-6.085	Deleterious	26.63	20.62	714	26	743	0.0349933	649	0	649	0	1.25021e-07	22	22	Artifact (9)
IT_07	1	115256484	T	C	NRAS	ENST00000369535	missense_variant	gAa/gGa|p.Glu76Gly/c.227A>G	4161	111	4309	0.02576	0	0	0	0	1	0	0	0	1	NO	NO	NO	NO	O	NO	NO	NO	NO	NO	NO	-6.085	Deleterious	25.43	19.5	2087	109	2232	0.0488351	2074	2	2077	0.000962927	1.39156e-29	22	22	Artifact (7)
IT_08	1	115256484	T	C	NRAS	ENST00000369535	missense_variant	gAa/gGa|p.Glu76Gly/c.227A>G	2514	80	2624	0.0304878	0	0	0	0	1	0	0	0	1	NO	NO	NO	NO	O	NO	NO	NO	NO	NO	NO	-6.085	Deleterious	24.91	20.92	1584	79	1693	0.0466627	930	1	931	0.00107411	1.06175e-14	22	22	Artifact (7)
IT_09	1	115256484	T	C	NRAS	ENST00000369535	missense_variant	gAa/gGa|p.Glu76Gly/c.227A>G	2995	177	3207	0.0551918	0	0	0	0	1	1	0	0	2	NO	NO	NO	NO	O	NO	NO	NO	NO	NO	NO	-6.085	Deleterious	25.12	19.33	1608	173	1815	0.0953168	1387	4	1392	0.00287356	2.54362e-39	22	22	Artifact (6)
IT_11	1	115256484	T	C	NRAS	ENST00000369535	missense_variant	gAa/gGa|p.Glu76Gly/c.227A>G	1645	45	1705	0.026393	0	0	0	0	1	0	0	0	1	NO	NO	NO	NO	O	NO	NO	NO	NO	NO	NO	-6.085	Deleterious	26.31	20.87	875	40	930	0.0430108	770	5	775	0.00645161	8.85496e-07	22	22	Artifact (7)
IT_12	1	115256484	T	C	NRAS	ENST00000369535	missense_variant	gAa/gGa|p.Glu76Gly/c.227A>G	2850	45	2913	0.015448	0	0	0	0	1	0	0	0	1	NO	NO	NO	NO	O	NO	NO	NO	NO	NO	NO	-6.085	Deleterious	27.32	22.82	1811	44	1873	0.0234917	1039	1	1040	0.000961538	5.34846e-08	22	22	Artifact (9)
IT_14	1	115256484	T	C	NRAS	ENST00000369535	missense_variant	gAa/gGa|p.Glu76Gly/c.227A>G	1682	20	1704	0.0117371	0	0	0	0	1	0	0	0	1	NO	NO	NO	NO	O	NO	NO	NO	NO	NO	NO	-6.085	Deleterious	26.31	23.55	962	14	978	0.0143149	720	6	726	0.00826446	0.363347	22	22	Artifact (8)
IT_15	1	115256484	T	C	NRAS	ENST00000369535	missense_variant	gAa/gGa|p.Glu76Gly/c.227A>G	7049	123	7216	0.0170455	0	0	0	0	1	0	0	0	1	NO	NO	NO	NO	O	NO	NO	NO	NO	NO	NO	-6.085	Deleterious	26.6	20.51	3637	119	3799	0.031324	3412	4	3417	0.00117062	9.17402e-29	22	22	Artifact (9)
IT_16	1	115256484	T	C	NRAS	ENST00000369535	missense_variant	gAa/gGa|p.Glu76Gly/c.227A>G	6320	75	6433	0.0116586	0	0	0	0	1	0	0	0	1	NO	NO	NO	NO	O	NO	NO	NO	NO	NO	NO	-6.085	Deleterious	27	20.49	3390	72	3498	0.0205832	2930	3	2935	0.00102215	5.22659e-16	22	22	Artifact (9)
IT_06	1	115256484	T	C	NRAS	ENST00000369535	missense_variant	gAa/gGa|p.Glu76Gly/c.227A>G	1944	90	2050	0.0439024	0	0	0	0	1	0	0	0	1	NO	NO	NO	NO	O	NO	NO	NO	NO	NO	NO	-6.085	Deleterious	26.53	20.01	1099	89	1203	0.0739817	845	1	847	0.00118064	3.17867e-20	22	22	Artifact (7)
IT_17	1	115256484	T	C	NRAS	ENST00000369535	missense_variant	gAa/gGa|p.Glu76Gly/c.227A>G	2039	30	2078	0.014437	0	0	0	0	1	0	0	0	1	NO	NO	NO	NO	O	NO	NO	NO	NO	NO	NO	-6.085	Deleterious	26.52	19.63	1109	27	1145	0.0235808	930	3	933	0.00321543	5.23081e-05	22	22	Artifact (9)
IT_18	1	115256484	T	C	NRAS	ENST00000369535	missense_variant	gAa/gGa|p.Glu76Gly/c.227A>G	1157	28	1191	0.0235097	0	0	0	0	1	0	0	0	1	NO	NO	NO	NO	O	NO	NO	NO	NO	NO	NO	-6.085	Deleterious	26.04	20.39	608	27	641	0.0421217	549	1	550	0.00181818	7.01916e-07	22	22	Artifact (7)
IT_19	1	115256484	T	C	NRAS	ENST00000369535	missense_variant	gAa/gGa|p.Glu76Gly/c.227A>G	3452	388	3900	0.0994872	0	0	0	0	1	0	0	0	1	NO	NO	NO	NO	O	NO	NO	NO	NO	NO	NO	-6.085	Deleterious	26.34	19.62	2194	380	2633	0.144322	1258	8	1267	0.00631413	2.52347e-58	22	22	Artifact (7)
IT_21	1	115256484	T	C	NRAS	ENST00000369535	missense_variant	gAa/gGa|p.Glu76Gly/c.227A>G	2450	46	2508	0.0183413	0	0	0	0	1	0	0	0	1	NO	NO	NO	NO	O	NO	NO	NO	NO	NO	NO	-6.085	Deleterious	27.09	20.59	1213	42	1267	0.0331492	1237	4	1241	0.00322321	3.91108e-09	22	22	Artifact (9)
IT_22	1	115256484	T	C	NRAS	ENST00000369535	missense_variant	gAa/gGa|p.Glu76Gly/c.227A>G	2142	53	2225	0.0238202	0	0	0	0	1	0	0	0	1	NO	NO	NO	NO	O	NO	NO	NO	NO	NO	NO	-6.085	Deleterious	26.44	20.49	1235	51	1316	0.0387538	907	2	909	0.00220022	2.96766e-10	22	22	Artifact (7)
IT_23	1	115256486	G	GC	NRAS	ENST00000369535	frameshift_variant	aca/acaG|p.Glu76fs/c.222_223insG	26279	305	26302	0.0115961	0	0	0	0	1	0	0	0	1	NO	NO	NO	NA	NA	NO	NO	NO	NO	NO	NO	NA	NA	27.16	NA	22636	298	22658	0.0131521	3643	7	3644	0.00192097	6.61114e-12	2	2	Artifact (6)
IT_16	1	115256486	G	GC	NRAS	ENST00000369535	frameshift_variant	aca/acaG|p.Glu76fs/c.222_223insG	63332	863	63357	0.0136212	0	0	0	0	1	0	0	0	1	NO	NO	NO	NA	NA	NO	NO	NO	NO	NO	NO	NA	NA	27.45	NA	33385	859	33407	0.0257132	29947	4	29950	0.000133556	3.40865e-228	2	2	Artifact (6)
IT_23	1	115256491	T	TC	NRAS	ENST00000369535	frameshift_variant	agg/aGgg|p.Thr74fs/c.217_218insG	26906	339	26951	0.0125784	0	0	0	0	1	0	0	0	1	NO	NO	NO	NA	NA	NO	NO	NO	NO	NO	NO	NA	NA	28.35	NA	22675	335	22718	0.014746	4231	4	4233	0.000944956	1.09589e-19	4	20	Artifact (9)
IT_09	1	115256491	T	TC	NRAS	ENST00000369535	frameshift_variant	agg/aGgg|p.Thr74fs/c.217_218insG	42070	713	42124	0.0169262	0	0	0	0	1	0	0	0	1	NO	NO	NO	NA	NA	NO	NO	NO	NO	NO	NO	NA	NA	25.34	NA	22058	710	22110	0.0321122	20012	3	20014	0.000149895	1.40962e-190	4	20	Artifact (9)
IT_10	1	115256491	T	TC	NRAS	ENST00000369535	frameshift_variant	agg/aGgg|p.Thr74fs/c.217_218insG	29415	416	29452	0.0141247	0	0	0	0	1	0	0	0	1	NO	NO	NO	NA	NA	NO	NO	NO	NO	NO	NO	NA	NA	25.62	NA	16199	413	16233	0.025442	13216	3	13219	0.000226946	1.24627e-100	4	20	Artifact (9)
IT_19	1	115256491	T	TC	NRAS	ENST00000369535	frameshift_variant	agg/aGgg|p.Thr74fs/c.217_218insG	107934	2211	108020	0.0204684	0	0	0	0	1	0	0	0	1	NO	NO	NO	NA	NA	NO	NO	NO	NO	NO	NO	NA	NA	27.97	NA	84851	2209	84936	0.0260078	23083	2	23084	8.66401e-05	1.1414e-223	4	20	Artifact (7)
IT_24	1	115256491	TC	T	NRAS	ENST00000369535	frameshift_variant	agg/|p.Thr74fs/c.218delG	20471	667	21145	0.0315441	0	0	0	0	1	0	0	0	1	NO	NO	NO	NA	NA	NO	NO	NO	NO	NO	NO	NA	NA	27.97	NA	17520	2	17525	0.000114123	2951	665	3620	0.183702	0	16	20	Artifact (10)
IT_03	1	115256491	TC	T	NRAS	ENST00000369535	frameshift_variant	agg/|p.Thr74fs/c.218delG	5576	409	5985	0.0683375	0	0	0	0	1	0	0	0	1	NO	NO	NO	NA	NA	NO	NO	NO	NO	NO	NO	NA	NA	26.95	NA	4257	1	4258	0.000234852	1319	408	1727	0.236248	4.85795e-235	16	20	Artifact (9)
IT_04	1	115256491	TC	T	NRAS	ENST00000369535	frameshift_variant	agg/|p.Thr74fs/c.218delG	4693	92	4786	0.0192227	0	0	0	0	1	0	0	0	1	NO	NO	NO	NA	NA	NO	NO	NO	NO	NO	NO	NA	NA	29.13	NA	4191	1	4193	0.000238493	502	91	593	0.153457	4.01368e-84	16	20	Artifact (12)
IT_09	1	115256491	TC	T	NRAS	ENST00000369535	frameshift_variant	agg/|p.Thr74fs/c.218delG	41349	814	42176	0.0193001	0	0	0	0	1	0	0	0	1	NO	NO	NO	NA	NA	NO	NO	NO	NO	NO	NO	NA	NA	23.16	NA	22086	11	22106	0.000497602	19263	803	20070	0.04001	5.32395e-242	16	20	Artifact (11)
IT_10	1	115256491	TC	T	NRAS	ENST00000369535	frameshift_variant	agg/|p.Thr74fs/c.218delG	28811	686	29504	0.0232511	0	0	0	0	1	0	0	0	1	NO	NO	NO	NA	NA	NO	NO	NO	NO	NO	NO	NA	NA	23.7	NA	16215	14	16234	0.000862388	12596	672	13270	0.0506405	7.86098e-213	16	20	Artifact (9)
IT_11	1	115256491	TC	T	NRAS	ENST00000369535	frameshift_variant	agg/|p.Thr74fs/c.218delG	25191	781	25978	0.0300639	0	0	0	0	1	0	0	0	1	NO	NO	NO	NA	NA	NO	NO	NO	NO	NO	NO	NA	NA	24.14	NA	15117	3	15126	0.000198334	10074	778	10852	0.0716919	1.21611e-295	16	20	Artifact (10)
IT_12	1	115256491	TC	T	NRAS	ENST00000369535	frameshift_variant	agg/|p.Thr74fs/c.218delG	34537	874	35415	0.0246788	0	0	0	0	1	0	0	0	1	NO	NO	NO	NA	NA	NO	NO	NO	NO	NO	NO	NA	NA	26.72	NA	25556	9	25569	0.000351989	8981	865	9846	0.0878529	0	16	20	Artifact (10)
IT_13	1	115256491	TC	T	NRAS	ENST00000369535	frameshift_variant	agg/|p.Thr74fs/c.218delG	19358	753	20114	0.0374366	0	0	0	0	1	0	0	0	1	NO	NO	NO	NA	NA	NO	NO	NO	NO	NO	NO	NA	NA	23.49	NA	10807	3	10812	0.000277469	8551	750	9302	0.0806278	3.75458e-252	16	20	Artifact (10)
IT_14	1	115256491	TC	T	NRAS	ENST00000369535	frameshift_variant	agg/|p.Thr74fs/c.218delG	25495	822	26326	0.0312239	0	0	0	0	1	0	0	0	1	NO	NO	NO	NA	NA	NO	NO	NO	NO	NO	NO	NA	NA	24.81	NA	16156	4	16169	0.000247387	9339	818	10157	0.0805356	0	16	20	Artifact (10)
IT_15	1	115256491	TC	T	NRAS	ENST00000369535	frameshift_variant	agg/|p.Thr74fs/c.218delG	57899	1151	59068	0.019486	0	0	0	0	1	0	0	0	1	NO	NO	NO	NA	NA	NO	NO	NO	NO	NO	NO	NA	NA	24.77	NA	31545	13	31568	0.000411809	26354	1138	27500	0.0413818	0	16	20	Artifact (11)
IT_06	1	115256491	TC	T	NRAS	ENST00000369535	frameshift_variant	agg/|p.Thr74fs/c.218delG	30711	370	31087	0.0119021	0	0	0	0	1	0	0	0	1	NO	NO	NO	NA	NA	NO	NO	NO	NO	NO	NO	NA	NA	27.88	NA	25339	9	25354	0.000354974	5372	361	5733	0.0629688	4.26617e-253	16	20	Artifact (12)
IT_17	1	115256491	TC	T	NRAS	ENST00000369535	frameshift_variant	agg/|p.Thr74fs/c.218delG	18211	770	18986	0.0405562	0	0	0	0	1	0	0	0	1	NO	NO	NO	NA	NA	NO	NO	NO	NO	NO	NO	NA	NA	24.76	NA	10489	11	10503	0.00104732	7722	759	8483	0.0894731	2.61387e-253	16	20	Artifact (9)
IT_18	1	115256491	TC	T	NRAS	ENST00000369535	frameshift_variant	agg/|p.Thr74fs/c.218delG	15157	745	15903	0.0468465	0	0	0	0	1	0	0	0	1	NO	NO	NO	NA	NA	NO	NO	NO	NO	NO	NO	NA	NA	23.68	NA	8708	10	8719	0.00114692	6449	735	7184	0.102311	4.85719e-244	16	20	Artifact (9)
IT_19	1	115256491	TC	T	NRAS	ENST00000369535	frameshift_variant	agg/|p.Thr74fs/c.218delG	105012	3145	108181	0.0290716	0	0	0	0	1	0	0	0	1	NO	NO	NO	NA	NA	NO	NO	NO	NO	NO	NO	NA	NA	27.91	NA	84862	72	84954	0.000847517	20150	3073	23227	0.132303	0	16	20	Artifact (9)
IT_20	1	115256491	TC	T	NRAS	ENST00000369535	frameshift_variant	agg/|p.Thr74fs/c.218delG	2367	40	2409	0.0166044	0	0	0	0	1	0	0	0	1	NO	NO	NO	NA	NA	NO	NO	NO	NO	NO	NO	NA	NA	27.03	NA	1498	0	1498	0	869	40	911	0.0439078	7.02818e-18	16	20	Artifact (12)
IT_22	1	115256491	TC	T	NRAS	ENST00000369535	frameshift_variant	agg/|p.Thr74fs/c.218delG	31522	525	32050	0.0163807	0	0	0	0	1	0	0	0	1	NO	NO	NO	NA	NA	NO	NO	NO	NO	NO	NO	NA	NA	24.6	NA	18105	25	18131	0.00137885	13417	500	13919	0.0359221	1.58004e-147	16	20	Artifact (11)
IT_19	1	115256496	A	AC	NRAS	ENST00000369535	frameshift_variant	atg/aGtg|p.Met72fs/c.214_215insG	109590	1120	109666	0.0102128	0	0	0	0	1	0	0	0	1	NO	NO	NO	NO	O	NO	NO	NO	NO	NO	NO	NA	NA	30.94	NA	84919	1113	84976	0.0130978	24671	7	24690	0.000283516	5.601e-110	1	1	Artifact (6)
IT_09	1	115256505	T	TC	NRAS	ENST00000369535	frameshift_variant	aga/agaG|p.Asp69fs/c.204_205insG	42105	470	42218	0.0111327	0	0	0	0	1	0	0	0	1	NO	NO	NO	NO	O	NO	NO	NO	NO	NO	NO	NA	NA	30.32	NA	21797	469	21865	0.0214498	20308	1	20353	4.91328e-05	2.16769e-131	3	3	Artifact (6)
IT_10	1	115256505	T	TC	NRAS	ENST00000369535	frameshift_variant	aga/agaG|p.Asp69fs/c.204_205insG	29598	303	29686	0.0102068	0	0	0	0	1	0	0	0	1	NO	NO	NO	NO	O	NO	NO	NO	NO	NO	NO	NA	NA	30.57	NA	15993	300	16055	0.0186858	13605	3	13631	0.000220087	1.68405e-74	3	3	Artifact (6)
IT_19	1	115256505	T	TC	NRAS	ENST00000369535	frameshift_variant	aga/agaG|p.Asp69fs/c.204_205insG	108307	1594	108524	0.014688	0	0	0	0	1	0	0	0	1	NO	NO	NO	NO	O	NO	NO	NO	NO	NO	NO	NA	NA	32.38	NA	83635	1591	83809	0.0189836	24672	3	24715	0.000121384	1.26749e-170	3	3	Artifact (6)
IT_23	1	115256512	TG	T	NRAS	ENST00000369535	frameshift_variant	gcc/|p.Met67fs/c.197delC	25403	485	25918	0.0187129	0	0	0	0	1	0	0	0	1	NO	NO	NO	NO	O	NO	NO	NO	NO	NO	NO	NA	NA	24.15	NA	21208	402	21629	0.0185862	4195	83	4289	0.0193518	0.711322	8	8	Artifact (7)
IT_01	1	115256512	TG	T	NRAS	ENST00000369535	frameshift_variant	gcc/|p.Met67fs/c.197delC	30434	495	30978	0.0159791	0	0	0	0	1	0	0	0	1	NO	NO	NO	NO	O	NO	NO	NO	NO	NO	NO	NA	NA	21.64	NA	15429	404	15858	0.0254761	15005	91	15120	0.00601852	1.35136e-45	8	8	Artifact (7)
IT_02	1	115256512	TG	T	NRAS	ENST00000369535	frameshift_variant	gcc/|p.Met67fs/c.197delC	13674	224	13914	0.0160989	0	0	0	0	1	0	0	0	1	NO	NO	NO	NO	O	NO	NO	NO	NO	NO	NO	NA	NA	23.02	NA	6673	190	6872	0.0276484	7001	34	7042	0.00482817	6.27079e-29	8	8	Artifact (7)
IT_07	1	115256512	TG	T	NRAS	ENST00000369535	frameshift_variant	gcc/|p.Met67fs/c.197delC	30157	898	31105	0.02887	0	0	0	0	1	0	0	0	1	NO	NO	NO	NO	O	NO	NO	NO	NO	NO	NO	NA	NA	21.83	NA	14791	850	15667	0.0542542	15366	48	15438	0.00310921	9.92462e-193	8	8	Artifact (5)
IT_08	1	115256512	TG	T	NRAS	ENST00000369535	frameshift_variant	gcc/|p.Met67fs/c.197delC	12304	745	13080	0.0569572	0	0	0	0	1	1	0	0	2	NO	NO	NO	NO	O	NO	NO	NO	NO	NO	NO	NA	NA	21.78	NA	10702	737	11465	0.0642826	1602	8	1615	0.00495356	1.40837e-32	8	8	Artifact (4)
IT_09	1	115256512	TG	T	NRAS	ENST00000369535	frameshift_variant	gcc/|p.Met67fs/c.197delC	39550	1267	40879	0.0309939	0	0	0	0	1	0	0	0	1	NO	NO	NO	NO	O	NO	NO	NO	NO	NO	NO	NA	NA	23.22	NA	19816	1161	21024	0.0552226	19734	106	19855	0.00533871	2.96119e-218	8	8	Artifact (5)
IT_10	1	115256512	TG	T	NRAS	ENST00000369535	frameshift_variant	gcc/|p.Met67fs/c.197delC	27779	567	28383	0.0199767	0	0	0	0	1	0	0	0	1	NO	NO	NO	NO	O	NO	NO	NO	NO	NO	NO	NA	NA	23	NA	14830	483	15332	0.0315027	12949	84	13051	0.00643629	4.96342e-57	8	8	Artifact (7)
IT_18	1	115256512	TG	T	NRAS	ENST00000369535	frameshift_variant	gcc/|p.Met67fs/c.197delC	15464	167	15642	0.0106764	0	0	0	0	1	0	0	0	1	NO	NO	NO	NO	O	NO	NO	NO	NO	NO	NO	NA	NA	23.73	NA	8174	83	8261	0.0100472	7290	84	7381	0.0113806	0.436307	8	8	Artifact (7)
IT_20	1	115256526	T	TCC	NRAS	ENST00000369535	frameshift_variant	caa/caaGG|p.Glu62fs/c.183_184insGG	1967	38	1971	0.0192796	0	0	0	0	1	0	0	0	1	NO	NO	NO	NA	NA	NO	NO	NO	NO	NO	NO	NA	NA	28.84	NA	1226	0	1227	0	741	38	744	0.0510753	1.42213e-16	1	1	Artifact (6)
IT_08	1	115256527	C	CT	NRAS	ENST00000369535	frameshift_variant	caa/cAaa|p.Glu62fs/c.181_182insA	13035	192	13056	0.0147059	0	0	0	0	1	0	0	0	1	NO	NO	NO	NA	NA	NO	NO	NO	NO	NO	NO	NA	NA	26.81	NA	11377	192	11398	0.0168451	1658	0	1658	0	1.12531e-11	2	7	Artifact (7)
IT_19	1	115256527	C	CT	NRAS	ENST00000369535	frameshift_variant	caa/cAaa|p.Glu62fs/c.181_182insA	108164	1426	108426	0.0131518	0	0	0	0	1	0	0	0	1	NO	NO	NO	NA	NA	NO	NO	NO	NO	NO	NO	NA	NA	27.22	NA	82686	1426	82939	0.0171934	25478	0	25487	0	1.32453e-165	2	7	Artifact (7)
IT_24	1	115256527	CT	C	NRAS	ENST00000369535	frameshift_variant	caa/|p.Glu62fs/c.182delA	21202	255	21511	0.0118544	0	0	0	0	1	0	0	0	1	NO	NO	NO	NA	NA	NO	NO	NO	NO	NO	NO	NA	NA	27.42	NA	17061	4	17097	0.000233959	4141	251	4414	0.0568645	2.62232e-168	5	7	Artifact (9)
IT_01	1	115256527	CT	C	NRAS	ENST00000369535	frameshift_variant	caa/|p.Glu62fs/c.182delA	30554	416	31041	0.0134016	0	0	0	0	1	0	0	0	1	NO	NO	NO	NA	NA	NO	NO	NO	NO	NO	NO	NA	NA	22.63	NA	15761	0	15790	0	14793	416	15251	0.0272769	1.78082e-130	5	7	Artifact (9)
IT_04	1	115256527	CT	C	NRAS	ENST00000369535	frameshift_variant	caa/|p.Glu62fs/c.182delA	4718	54	4780	0.0112971	0	0	0	0	1	0	0	0	1	NO	NO	NO	NA	NA	NO	NO	NO	NO	NO	NO	NA	NA	26.63	NA	4002	0	4009	0	716	54	771	0.0700389	3.34902e-44	5	7	Artifact (9)
IT_10	1	115256527	CT	C	NRAS	ENST00000369535	frameshift_variant	caa/|p.Glu62fs/c.182delA	28073	321	28440	0.0112869	0	0	0	0	1	0	0	0	1	NO	NO	NO	NA	NA	NO	NO	NO	NO	NO	NO	NA	NA	23.82	NA	15225	2	15244	0.000131199	12848	319	13196	0.024174	6.46561e-104	5	7	Artifact (9)
IT_22	1	115256527	CT	C	NRAS	ENST00000369535	frameshift_variant	caa/|p.Glu62fs/c.182delA	31696	343	32081	0.0106917	0	0	0	0	1	0	0	0	1	NO	NO	NO	NA	NA	NO	NO	NO	NO	NO	NO	NA	NA	23.86	NA	17052	3	17073	0.000175716	14644	340	15008	0.0226546	7.99918e-108	5	7	Artifact (9)
IT_24	1	115256533	CA	C	NRAS	ENST00000369535	frameshift_variant	gct/|p.Gly60fs/c.177delT	21304	216	21577	0.0100107	0	0	0	0	1	0	0	0	1	NO	NO	NO	NO	O	NO	NO	NO	NO	NO	NO	NA	NA	28.34	NA	17027	1	17071	5.85789e-05	4277	215	4506	0.0477142	1.43376e-146	1	1	Artifact (6)
IT_01	1	115256545	G	GA	NRAS	ENST00000369535	frameshift_variant	ata/ataT|p.Leu56fs/c.165_166insT	31149	319	31174	0.0102329	0	0	0	0	1	0	0	0	1	NO	NO	NO	NO	O	NO	NO	NO	NO	NO	NO	NA	NA	29.19	NA	15712	2	15726	0.000127178	15437	317	15448	0.0205205	2.11504e-92	2	2	Artifact (6)
IT_08	1	115256545	G	GA	NRAS	ENST00000369535	frameshift_variant	ata/ataT|p.Leu56fs/c.165_166insT	13008	279	13023	0.0214236	0	0	0	0	1	0	0	0	1	NO	NO	NO	NO	O	NO	NO	NO	NO	NO	NO	NA	NA	30.51	NA	11295	4	11305	0.000353826	1713	275	1718	0.16007	7.46233e-227	2	2	Artifact (4)
IT_01	1	115256549	G	GT	NRAS	ENST00000369535	frameshift_variant	gac/gAac|p.Asp54fs/c.160_161insA	31196	691	31224	0.0221304	0	0	0	0	1	0	0	0	1	NO	NO	NO	NO	O	NO	NO	NO	NO	NO	NO	NA	NA	28.32	NA	15699	1	15716	6.36294e-05	15497	690	15508	0.0444932	1.47087e-204	3	3	Artifact (4)
IT_08	1	115256549	G	GT	NRAS	ENST00000369535	frameshift_variant	gac/gAac|p.Asp54fs/c.160_161insA	13028	249	13041	0.0190936	0	0	0	0	1	0	0	0	1	NO	NO	NO	NO	O	NO	NO	NO	NO	NO	NO	NA	NA	30.34	NA	11278	7	11289	0.000620073	1750	242	1752	0.138128	3.66204e-193	3	3	Artifact (6)
IT_06	1	115256549	G	GT	NRAS	ENST00000369535	frameshift_variant	gac/gAac|p.Asp54fs/c.160_161insA	30568	373	30587	0.0121947	0	0	0	0	1	0	0	0	1	NO	NO	NO	NO	O	NO	NO	NO	NO	NO	NO	NA	NA	30.72	NA	24509	5	24522	0.000203899	6059	368	6065	0.060676	2.62334e-245	3	3	Artifact (6)
IT_19	1	115256562	G	GT	NRAS	ENST00000369535	frameshift_variant	gaa/gaAa|p.Thr50fs/c.146dupA	108360	1352	108432	0.0124686	0	0	0	0	1	0	0	0	1	NO	NO	NO	NA	NA	NO	NO	NO	NO	NO	NO	NA	NA	29.25	NA	81738	1331	81796	0.0162722	26622	21	26636	0.000788407	2.82531e-129	2	2	Artifact (5)
IT_20	1	115256562	G	GT	NRAS	ENST00000369535	frameshift_variant	gaa/gaAa|p.Thr50fs/c.146dupA	1830	34	1831	0.0185691	0	0	0	0	1	0	0	0	1	NO	NO	NO	NA	NA	NO	NO	NO	NO	NO	NO	NA	NA	29.99	NA	1128	34	1128	0.0301418	702	0	703	0	1.79766e-07	2	2	Artifact (6)
IT_23	1	115256574	A	AT	NRAS	ENST00000369535	frameshift_variant	gtt/gttA|p.Ile46fs/c.135_136insA	26552	399	26568	0.0150181	0	0	0	0	1	0	0	0	1	NO	NO	NO	NO	O	NO	NO	NO	NO	NO	NO	NA	NA	29.09	NA	21168	10	21181	0.000472121	5384	389	5387	0.0722109	3.34201e-247	4	4	Artifact (7)
IT_01	1	115256574	A	AT	NRAS	ENST00000369535	frameshift_variant	gtt/gttA|p.Ile46fs/c.135_136insA	31222	631	31264	0.020183	0	0	0	0	1	0	0	0	1	NO	NO	NO	NO	O	NO	NO	NO	NO	NO	NO	NA	NA	28.82	NA	15582	6	15595	0.000384739	15640	625	15669	0.0398877	1.62777e-173	4	4	Artifact (6)
IT_08	1	115256574	A	AT	NRAS	ENST00000369535	frameshift_variant	gtt/gttA|p.Ile46fs/c.135_136insA	13011	537	13021	0.0412411	0	0	0	0	1	0	0	0	1	NO	NO	NO	NO	O	NO	NO	NO	NO	NO	NO	NA	NA	29.61	NA	11099	5	11105	0.000450248	1912	532	1916	0.277662	0	4	4	Artifact (6)
IT_06	1	115256574	A	AT	NRAS	ENST00000369535	frameshift_variant	gtt/gttA|p.Ile46fs/c.135_136insA	30575	545	30591	0.0178157	0	0	0	0	1	0	0	0	1	NO	NO	NO	NO	O	NO	NO	NO	NO	NO	NO	NA	NA	30.48	NA	24290	5	24301	0.000205753	6285	540	6290	0.0858506	0	4	4	Artifact (8)
IT_14	1	115256583	T	TA	NRAS	ENST00000369535	frameshift_variant	caa/cTaa|p.Gln43fs/c.127_128insT	25647	350	25703	0.0136171	0	0	0	0	1	0	0	0	1	NO	NO	NO	NO	O	NO	NO	NO	NO	NO	NO	NA	NA	27.04	NA	15368	350	15396	0.0227332	10279	0	10307	0	9.5147e-78	1	1	Artifact (6)
IT_19	1	115256584	G	GT	NRAS	ENST00000369535	frameshift_variant	aaa/aAaa|p.Gln43fs/c.124dupA	107510	1886	107608	0.0175266	0	0	0	0	1	0	0	0	1	NO	NO	NO	NO	O	NO	NO	NO	NO	NO	NO	NA	NA	26.44	NA	80913	1851	80991	0.0228544	26597	35	26617	0.00131495	1.34132e-173	2	25	Artifact (6)
IT_20	1	115256584	G	GT	NRAS	ENST00000369535	frameshift_variant	aaa/aAaa|p.Gln43fs/c.124dupA	1803	47	1806	0.0260244	0	0	0	0	1	0	0	0	1	NO	NO	NO	NO	O	NO	NO	NO	NO	NO	NO	NA	NA	27.74	NA	1109	45	1111	0.0405041	694	2	695	0.0028777	1.15385e-07	2	25	Artifact (5)
IT_23	1	115256584	GT	G	NRAS	ENST00000369535	frameshift_variant	aaa/|p.Lys42fs/c.126delA	23431	2883	26458	0.108965	1	1	0	0	1	1	0	0	4	NO	NO	NO	NO	O	NO	NO	NO	NO	NO	NO	NA	NA	27.25	NA	20660	322	21055	0.0152933	2771	2561	5403	0.473996	0	23	25	Artifact (5)
IT_24	1	115256584	GT	G	NRAS	ENST00000369535	frameshift_variant	aaa/|p.Lys42fs/c.126delA	17084	4061	21330	0.190389	1	1	0	0	1	1	0	0	4	NO	NO	NO	NO	O	NO	NO	NO	NO	NO	NO	NA	NA	27.75	NA	16202	360	16611	0.0216724	882	3701	4719	0.784276	0	23	25	Artifact (5)
IT_01	1	115256584	GT	G	NRAS	ENST00000369535	frameshift_variant	aaa/|p.Lys42fs/c.125delA	29526	1588	31227	0.0508534	0	0	0	0	1	1	0	0	2	NO	NO	NO	NO	O	NO	NO	NO	NO	NO	NO	NA	NA	23.4	NA	14970	503	15527	0.0323952	14556	1085	15700	0.0691083	2.45917e-50	23	25	Artifact (7)
IT_02	1	115256584	GT	G	NRAS	ENST00000369535	frameshift_variant	aaa/|p.Lys42fs/c.125delA	13301	546	13899	0.0392834	0	0	0	0	1	0	0	0	1	NO	NO	NO	NO	O	NO	NO	NO	NO	NO	NO	NA	NA	24.68	NA	6486	215	6726	0.0319655	6815	331	7173	0.0461453	1.77565e-05	23	25	Artifact (9)
IT_03	1	115256584	GT	G	NRAS	ENST00000369535	frameshift_variant	aaa/|p.Lys42fs/c.126delA	4157	1720	5932	0.289953	0	1	1	0	1	1	0	0	4	NO	NO	NO	NO	O	NO	NO	NO	NO	NO	NO	NA	NA	26.4	NA	3769	285	4066	0.0700935	388	1435	1866	0.769025	0	23	25	Artifact (5)
IT_04	1	115256584	GT	G	NRAS	ENST00000369535	frameshift_variant	aaa/|p.Lys42fs/c.126delA	3902	813	4752	0.171086	0	1	0	0	1	1	0	0	3	NO	NO	NO	NO	O	NO	NO	NO	NO	NO	NO	NA	NA	29.1	NA	3784	138	3929	0.0351234	118	675	823	0.82017	0	23	25	Artifact (6)
IT_07	1	115256584	GT	G	NRAS	ENST00000369535	frameshift_variant	aaa/|p.Lys42fs/c.125delA	29420	1346	30945	0.0434965	0	0	0	0	1	1	0	0	2	NO	NO	NO	NO	O	NO	NO	NO	NO	NO	NO	NA	NA	22.22	NA	14697	310	15088	0.0205461	14723	1036	15857	0.0653339	9.30646e-88	23	25	Artifact (8)
IT_08	1	115256584	GT	G	NRAS	ENST00000369535	frameshift_variant	aaa/|p.Lys42fs/c.125delA	11914	969	12952	0.0748147	0	0	0	0	1	1	0	0	2	NO	NO	NO	NO	O	NO	NO	NO	NO	NO	NO	NA	NA	26.88	NA	10787	208	11033	0.0188525	1127	761	1919	0.396561	0	23	25	Artifact (7)
IT_09	1	115256584	GT	G	NRAS	ENST00000369535	frameshift_variant	aaa/|p.Lys42fs/c.125delA	39308	1308	40763	0.0320879	0	0	0	0	1	0	0	0	1	NO	NO	NO	NO	O	NO	NO	NO	NO	NO	NO	NA	NA	23.88	NA	19428	682	20174	0.0338059	19880	626	20589	0.0304046	0.0559304	23	25	Artifact (9)
IT_10	1	115256584	GT	G	NRAS	ENST00000369535	frameshift_variant	aaa/|p.Lys42fs/c.125delA	27101	1232	28433	0.0433299	0	0	0	0	1	1	0	0	2	NO	NO	NO	NO	O	NO	NO	NO	NO	NO	NO	NA	NA	23.42	NA	14146	661	14858	0.0444878	12955	571	13575	0.0420626	0.321575	23	25	Artifact (8)
IT_11	1	115256584	GT	G	NRAS	ENST00000369535	frameshift_variant	aaa/|p.Lys42fs/c.125delA	23829	1723	25662	0.0671421	0	0	0	0	1	1	0	0	2	NO	NO	NO	NO	O	NO	NO	NO	NO	NO	NO	NA	NA	23.12	NA	14256	200	14508	0.0137855	9573	1523	11154	0.136543	0	23	25	Artifact (7)
IT_12	1	115256584	GT	G	NRAS	ENST00000369535	frameshift_variant	aaa/|p.Lys42fs/c.125delA	32001	2388	34542	0.0691332	0	0	0	0	1	1	0	0	2	NO	NO	NO	NO	O	NO	NO	NO	NO	NO	NO	NA	NA	24.49	NA	23772	396	24266	0.0163191	8229	1992	10276	0.19385	0	23	25	Artifact (7)
IT_13	1	115256584	GT	G	NRAS	ENST00000369535	frameshift_variant	aaa/|p.Lys42fs/c.125delA	18587	1084	19753	0.0548777	0	0	0	0	1	1	0	0	2	NO	NO	NO	NO	O	NO	NO	NO	NO	NO	NO	NA	NA	21.64	NA	10115	158	10301	0.0153383	8472	926	9452	0.0979687	8.76819e-156	23	25	Artifact (7)
IT_15	1	115256584	GT	G	NRAS	ENST00000369535	frameshift_variant	aaa/|p.Lys42fs/c.125delA	52858	2428	55523	0.0437296	0	0	0	0	1	1	0	0	2	NO	NO	NO	NO	O	NO	NO	NO	NO	NO	NO	NA	NA	21.66	NA	27396	347	27847	0.0124609	25462	2081	27676	0.0751915	0	23	25	Artifact (8)
IT_16	1	115256584	GT	G	NRAS	ENST00000369535	frameshift_variant	aaa/|p.Lys42fs/c.125delA	59763	1221	61212	0.0199471	0	0	0	0	1	0	0	0	1	NO	NO	NO	NO	O	NO	NO	NO	NO	NO	NO	NA	NA	22.88	NA	29803	418	30327	0.0137831	29960	803	30885	0.0259997	1.20169e-27	23	25	Artifact (11)
IT_05	1	115256584	GT	G	NRAS	ENST00000369535	frameshift_variant	aaa/|p.Lys42fs/c.126delA	55200	5056	60503	0.0835661	1	0	0	0	1	1	0	0	3	NO	NO	NO	NO	O	NO	NO	NO	NO	NO	NO	NA	NA	22.99	NA	30519	374	30995	0.0120665	24681	4682	29508	0.158669	0	23	25	Artifact (7)
IT_06	1	115256584	GT	G	NRAS	ENST00000369535	frameshift_variant	aaa/|p.Lys42fs/c.126delA	27490	2924	30483	0.0959223	1	0	0	0	1	1	0	0	3	NO	NO	NO	NO	O	NO	NO	NO	NO	NO	NO	NA	NA	27.72	NA	23840	296	24184	0.0122395	3650	2628	6299	0.417209	0	23	25	Artifact (7)
IT_17	1	115256584	GT	G	NRAS	ENST00000369535	frameshift_variant	aaa/|p.Lys42fs/c.125delA	16222	1505	17815	0.0844794	0	0	0	0	1	1	0	0	2	NO	NO	NO	NO	O	NO	NO	NO	NO	NO	NO	NA	NA	22.3	NA	9235	203	9479	0.0214158	6987	1302	8336	0.15619	2.95886e-248	23	25	Artifact (7)
IT_18	1	115256584	GT	G	NRAS	ENST00000369535	frameshift_variant	aaa/|p.Lys42fs/c.125delA	14244	1495	15785	0.0947102	0	0	0	0	1	1	0	0	2	NO	NO	NO	NO	O	NO	NO	NO	NO	NO	NO	NA	NA	21.29	NA	7768	154	7940	0.0193955	6476	1341	7845	0.170937	4.66028e-262	23	25	Artifact (7)
IT_19	1	115256584	GT	G	NRAS	ENST00000369535	frameshift_variant	aaa/|p.Lys42fs/c.126delA	96334	11060	107711	0.102682	1	1	1	0	1	1	0	0	5	NO	NO	NO	NO	O	NO	NO	NO	NO	NO	NO	NA	NA	25.27	NA	78499	2345	80980	0.0289578	17835	8715	26731	0.326026	0	23	25	Artifact (4)
IT_20	1	115256584	GT	G	NRAS	ENST00000369535	frameshift_variant	aaa/|p.Lys42fs/c.125delA	1688	116	1807	0.0641948	0	0	0	0	1	1	0	0	2	NO	NO	NO	NO	O	NO	NO	NO	NO	NO	NO	NA	NA	24.55	NA	1079	30	1111	0.0270027	609	86	696	0.123563	9.68217e-16	23	25	Artifact (7)
IT_21	1	115256584	GT	G	NRAS	ENST00000369535	frameshift_variant	aaa/|p.Lys42fs/c.125delA	31689	480	32279	0.0148703	0	0	0	0	1	0	0	0	1	NO	NO	NO	NO	O	NO	NO	NO	NO	NO	NO	NA	NA	25.86	NA	15158	218	15424	0.0141338	16531	262	16855	0.0155443	0.311208	23	25	Artifact (11)
IT_22	1	115256584	GT	G	NRAS	ENST00000369535	frameshift_variant	aaa/|p.Lys42fs/c.126delA	30100	2425	32612	0.0743591	1	0	0	0	1	1	0	0	3	NO	NO	NO	NO	O	NO	NO	NO	NO	NO	NO	NA	NA	22.67	NA	16479	166	16685	0.00994906	13621	2259	15927	0.141835	0	23	25	Artifact (7)
IT_14	1	115256589	C	CT	NRAS	ENST00000369535	frameshift_variant	tac/tacA|p.Arg41fs/c.120_121insA	25551	520	25636	0.020284	0	0	0	0	1	0	0	0	1	NO	NO	NO	NO	O	NO	NO	NO	NO	NO	NO	NA	NA	26.26	NA	15234	520	15317	0.0339492	10317	0	10319	0	7.26074e-116	1	1	Artifact (4)
IT_23	1	115256595	GA	G	NRAS	ENST00000369535	frameshift_variant	tct/|p.Ser39fs/c.115delT	22525	3699	26401	0.140108	1	1	0	0	1	1	0	0	4	NO	NO	NO	NO	O	NO	NO	NO	NO	NO	NO	NA	NA	29.97	NA	20885	8	20924	0.000382336	1640	3691	5477	0.673909	0	24	24	Artifact (5)
IT_24	1	115256595	GA	G	NRAS	ENST00000369535	frameshift_variant	tct/|p.Ser39fs/c.115delT	16998	3888	21154	0.183795	1	1	0	0	1	1	0	0	4	NO	NO	NO	NO	O	NO	NO	NO	NO	NO	NO	NA	NA	29.33	NA	16365	22	16416	0.00134016	633	3866	4738	0.815956	0	24	24	Artifact (4)
IT_01	1	115256595	GA	G	NRAS	ENST00000369535	frameshift_variant	tct/|p.Ser39fs/c.115delT	19429	11680	31212	0.374215	1	1	0	0	0	1	0	0	3	NO	NO	NO	NO	O	NO	NO	NO	NO	NO	NO	NA	NA	28.57	NA	15436	5	15467	0.000323269	3993	11675	15745	0.741505	0	24	24	Artifact (6)
IT_02	1	115256595	GA	G	NRAS	ENST00000369535	frameshift_variant	tct/|p.Ser39fs/c.115delT	7945	5921	13897	0.426063	1	1	0	0	1	1	0	0	4	NO	NO	NO	NO	O	NO	NO	NO	NO	NO	NO	NA	NA	28.87	NA	6694	1	6708	0.000149076	1251	5920	7189	0.82348	0	24	24	Artifact (5)
IT_03	1	115256595	GA	G	NRAS	ENST00000369535	frameshift_variant	tct/|p.Ser39fs/c.115delT	4109	1645	5917	0.278013	0	1	1	0	1	1	0	0	4	NO	NO	NO	NO	O	NO	NO	NO	NO	NO	NO	NA	NA	32.09	NA	4045	0	4051	0	64	1645	1866	0.881565	0	24	24	Artifact (5)
IT_04	1	115256595	GA	G	NRAS	ENST00000369535	frameshift_variant	tct/|p.Ser39fs/c.115delT	3943	677	4733	0.143038	0	1	0	0	1	1	0	0	3	NO	NO	NO	NO	O	NO	NO	NO	NO	NO	NO	NA	NA	31.85	NA	3900	0	3910	0	43	677	823	0.8226	0	24	24	Artifact (6)
IT_07	1	115256595	GA	G	NRAS	ENST00000369535	frameshift_variant	tct/|p.Ser39fs/c.115delT	16994	13783	30868	0.446514	1	1	1	0	1	1	0	0	5	NO	NO	NO	NO	O	NO	NO	NO	NO	NO	NO	NA	NA	28.89	NA	14953	6	14982	0.000400481	2041	13777	15886	0.867242	0	24	24	Artifact (4)
IT_08	1	115256595	GA	G	NRAS	ENST00000369535	frameshift_variant	gat/|p.Ser39fs/c.114delT	11985	831	12847	0.0646844	0	0	0	0	1	1	0	0	2	NO	NO	NO	NO	O	NO	NO	NO	NO	NO	NO	NA	NA	29.59	NA	10900	4	10922	0.000366233	1085	827	1925	0.42961	0	24	24	Artifact (7)
IT_09	1	115256595	GA	G	NRAS	ENST00000369535	frameshift_variant	tct/|p.Ser39fs/c.115delT	21591	18863	40629	0.464274	1	1	0	0	1	1	0	0	4	NO	NO	NO	NO	O	NO	NO	NO	NO	NO	NO	NA	NA	29.21	NA	19966	4	19994	0.00020006	1625	18859	20635	0.913933	0	24	24	Artifact (5)
IT_10	1	115256595	GA	G	NRAS	ENST00000369535	frameshift_variant	tct/|p.Ser39fs/c.115delT	15529	12667	28344	0.446902	1	1	0	0	1	1	0	1	5	NO	NO	NO	NO	O	NO	NO	NO	NO	NO	NO	NA	NA	29.91	NA	14704	6	14735	0.000407194	825	12661	13609	0.93034	0	24	24	Artifact (4)
IT_11	1	115256595	GA	G	NRAS	ENST00000369535	frameshift_variant	tct/|p.Ser39fs/c.115delT	18526	6983	25592	0.272859	1	1	0	0	1	1	0	0	4	NO	NO	NO	NO	O	NO	NO	NO	NO	NO	NO	NA	NA	29.79	NA	14396	3	14425	0.000207972	4130	6980	11167	0.625056	0	24	24	Artifact (5)
IT_12	1	115256595	GA	G	NRAS	ENST00000369535	frameshift_variant	tct/|p.Ser39fs/c.115delT	26232	8093	34453	0.2349	1	1	0	0	1	1	0	0	4	NO	NO	NO	NO	O	NO	NO	NO	NO	NO	NO	NA	NA	32.06	NA	24109	3	24140	0.000124275	2123	8090	10313	0.784447	0	24	24	Artifact (5)
IT_13	1	115256595	GA	G	NRAS	ENST00000369535	frameshift_variant	tct/|p.Ser39fs/c.115delT	14657	5024	19717	0.254805	1	1	0	0	1	1	0	0	4	NO	NO	NO	NO	O	NO	NO	NO	NO	NO	NO	NA	NA	28.53	NA	10238	3	10259	0.000292426	4419	5021	9458	0.530873	0	24	24	Artifact (5)
IT_14	1	115256595	GA	G	NRAS	ENST00000369535	frameshift_variant	tct/|p.Ser39fs/c.115delT	18968	6529	25550	0.255538	1	1	0	0	1	1	0	0	4	NO	NO	NO	NO	O	NO	NO	NO	NO	NO	NO	NA	NA	29.83	NA	15188	1	15216	6.57203e-05	3780	6528	10334	0.631701	0	24	24	Artifact (5)
IT_15	1	115256595	GA	G	NRAS	ENST00000369535	frameshift_variant	tct/|p.Ser39fs/c.115delT	40171	15238	55567	0.274228	1	1	0	0	1	1	0	0	4	NO	NO	NO	NO	O	NO	NO	NO	NO	NO	NO	NA	NA	27.18	NA	27605	15	27650	0.000542495	12566	15223	27917	0.545295	0	24	24	Artifact (4)
IT_16	1	115256595	GA	G	NRAS	ENST00000369535	frameshift_variant	tct/|p.Ser39fs/c.115delT	49872	11113	61120	0.181823	1	1	0	0	1	1	0	0	4	NO	NO	NO	NO	O	NO	NO	NO	NO	NO	NO	NA	NA	26.65	NA	30031	18	30080	0.000598404	19841	11095	31040	0.357442	0	24	24	Artifact (4)
IT_05	1	115256595	GA	G	NRAS	ENST00000369535	frameshift_variant	tct/|p.Ser39fs/c.115delT	36890	23317	60421	0.385909	1	1	1	0	1	1	0	0	5	NO	NO	NO	NO	O	NO	NO	NO	NO	NO	NO	NA	NA	28.31	NA	30816	4	30863	0.000129605	6074	23313	29558	0.78872	0	24	24	Artifact (4)
IT_06	1	115256595	GA	G	NRAS	ENST00000369535	frameshift_variant	tct/|p.Ser39fs/c.115delT	25248	5017	30416	0.164946	1	1	0	0	1	1	0	0	4	NO	NO	NO	NO	O	NO	NO	NO	NO	NO	NO	NA	NA	30.08	NA	24060	6	24086	0.000249107	1188	5011	6330	0.791627	0	24	24	Artifact (5)
IT_17	1	115256595	GA	G	NRAS	ENST00000369535	frameshift_variant	tct/|p.Ser39fs/c.115delT	13510	4248	17807	0.238558	1	1	0	0	1	1	0	0	4	NO	NO	NO	NO	O	NO	NO	NO	NO	NO	NO	NA	NA	28.04	NA	9418	2	9434	0.000211999	4092	4246	8373	0.507106	0	24	24	Artifact (5)
IT_18	1	115256595	GA	G	NRAS	ENST00000369535	frameshift_variant	tct/|p.Ser39fs/c.115delT	11951	3792	15795	0.240076	1	1	0	0	1	1	0	0	4	NO	NO	NO	NO	O	NO	NO	NO	NO	NO	NO	NA	NA	26.69	NA	7882	3	7893	0.000380084	4069	3789	7902	0.479499	0	24	24	Artifact (5)
IT_19	1	115256595	GA	G	NRAS	ENST00000369535	frameshift_variant	tct/|p.Ser39fs/c.115delT	91362	15511	107407	0.144413	1	1	1	0	1	1	0	0	5	NO	NO	NO	NO	O	NO	NO	NO	NO	NO	NO	NA	NA	31.7	NA	80540	21	80613	0.000260504	10822	15490	26794	0.578115	0	24	24	Artifact (3)
IT_20	1	115256595	GA	G	NRAS	ENST00000369535	frameshift_variant	tct/|p.Ser39fs/c.115delT	1457	346	1807	0.191478	1	1	0	0	1	1	0	0	4	NO	NO	NO	NO	O	NO	NO	NO	NO	NO	NO	NA	NA	30.38	NA	1111	0	1111	0	346	346	696	0.497126	3.44793e-175	24	24	Artifact (5)
IT_21	1	115256595	GA	G	NRAS	ENST00000369535	frameshift_variant	gat/|p.Ser39fs/c.114delT	30526	1631	32227	0.0506097	0	0	0	0	1	1	0	0	2	NO	NO	NO	NO	O	NO	NO	NO	NO	NO	NO	NA	NA	27.54	NA	15303	6	15333	0.000391313	15223	1625	16894	0.096188	0	24	24	Artifact (7)
IT_22	1	115256595	GA	G	NRAS	ENST00000369535	frameshift_variant	tct/|p.Ser39fs/c.115delT	29241	3345	32644	0.102469	1	1	0	0	1	1	0	0	4	NO	NO	NO	NO	O	NO	NO	NO	NO	NO	NO	NA	NA	25.86	NA	16574	2	16596	0.000120511	12667	3343	16048	0.208313	0	24	24	Artifact (5)
IT_23	1	115258679	TG	T	NRAS	ENST00000369535	frameshift_variant	ccc/|p.Thr35fs/c.101delC	1684	43	1727	0.0248987	0	0	0	0	1	0	0	0	1	NO	NO	NO	NO	O	NO	NO	NO	NO	NO	NO	NA	NA	22.74	NA	718	3	721	0.00416089	966	40	1006	0.0397614	3.97292e-07	6	6	Artifact (6)
IT_15	1	115258679	TG	T	NRAS	ENST00000369535	frameshift_variant	ccc/|p.Thr35fs/c.101delC	4544	82	4630	0.0177106	0	0	0	0	1	0	0	0	1	NO	NO	NO	NO	O	NO	NO	NO	NO	NO	NO	NA	NA	25.53	NA	1996	1	1997	0.000500751	2548	81	2633	0.0307634	5.00875e-19	6	6	Artifact (8)
IT_16	1	115258679	TG	T	NRAS	ENST00000369535	frameshift_variant	ccc/|p.Thr35fs/c.101delC	2872	65	2940	0.0221088	0	0	0	0	1	0	0	0	1	NO	NO	NO	NO	O	NO	NO	NO	NO	NO	NO	NA	NA	24.88	NA	1031	5	1037	0.0048216	1841	60	1903	0.0315292	2.67889e-07	6	6	Artifact (6)
IT_17	1	115258720	AT	A	NRAS	ENST00000369535	frameshift_variant	aca/|p.Ile21fs/c.60delA	1102	26	1128	0.0230496	0	0	0	0	1	0	0	0	1	NO	NO	NO	NO	O	NO	NO	NO	NO	NO	NO	NA	NA	26.34	NA	541	0	541	0	561	26	587	0.044293	3.57739e-08	8	8	Artifact (6)
IT_19	1	115258720	AT	A	NRAS	ENST00000369535	frameshift_variant	aca/|p.Ile21fs/c.60delA	5454	126	5586	0.0225564	0	0	0	0	1	0	0	0	1	NO	NO	NO	NO	O	NO	NO	NO	NO	NO	NO	NA	NA	25.43	NA	1866	0	1868	0	3588	126	3718	0.0338892	3.08111e-23	8	8	Artifact (6)
IT_20	1	115258720	AT	A	NRAS	ENST00000369535	frameshift_variant	aca/|p.Ile21fs/c.60delA	1150	22	1175	0.0187234	0	0	0	0	1	0	0	0	1	NO	NO	NO	NO	O	NO	NO	NO	NO	NO	NO	NA	NA	26.45	NA	477	0	477	0	673	22	698	0.0315186	9.95539e-06	8	8	Artifact (8)
IT_22	1	115258720	AT	A	NRAS	ENST00000369535	frameshift_variant	aca/|p.Ile21fs/c.60delA	1651	27	1682	0.0160523	0	0	0	0	1	0	0	0	1	NO	NO	NO	NO	O	NO	NO	NO	NO	NO	NO	NA	NA	25.78	NA	594	0	594	0	1057	27	1088	0.0248162	1.38957e-05	8	8	Artifact (8)
IT_23	1	115258732	CT	C	NRAS	ENST00000369535	frameshift_variant	aaa/|p.Ser17fs/c.48delA	1672	47	1722	0.0272938	0	0	0	0	1	0	0	0	1	NO	NO	NO	NA	NA	NO	NO	NO	NO	NO	NO	NA	NA	19.77	NA	695	12	710	0.0169014	977	35	1012	0.034585	0.034372	24	24	Artifact (8)
IT_01	1	115258732	CT	C	NRAS	ENST00000369535	frameshift_variant	aaa/|p.Ser17fs/c.48delA	1013	29	1045	0.0277512	0	0	0	0	1	0	0	0	1	NO	NO	NO	NA	NA	NO	NO	NO	NO	NO	NO	NA	NA	20.09	NA	421	1	424	0.00235849	592	28	621	0.0450886	7.64817e-06	24	24	Artifact (9)
IT_02	1	115258732	CT	C	NRAS	ENST00000369535	frameshift_variant	aaa/|p.Ser17fs/c.48delA	486	20	509	0.0392927	0	0	0	0	1	0	0	0	1	NO	NO	NO	NA	NA	NO	NO	NO	NO	NO	NO	NA	NA	19.65	NA	208	0	208	0	278	20	301	0.0664452	2.46164e-05	24	24	Artifact (9)
IT_07	1	115258732	CT	C	NRAS	ENST00000369535	frameshift_variant	aaa/|p.Ser17fs/c.48delA	2035	23	2066	0.0111326	0	0	0	0	1	0	0	0	1	NO	NO	NO	NA	NA	NO	NO	NO	NO	NO	NO	NA	NA	20.06	NA	840	5	846	0.00591017	1195	18	1220	0.0147541	0.0858947	24	24	Artifact (10)
IT_08	1	115258732	CT	C	NRAS	ENST00000369535	frameshift_variant	aaa/|p.Ser17fs/c.48delA	1683	33	1727	0.0191083	0	0	0	0	1	0	0	0	1	NO	NO	NO	NA	NA	NO	NO	NO	NO	NO	NO	NA	NA	19.63	NA	665	6	674	0.00890208	1018	27	1053	0.025641	0.0117182	24	24	Artifact (10)
IT_09	1	115258732	CT	C	NRAS	ENST00000369535	frameshift_variant	aaa/|p.Ser17fs/c.48delA	1556	38	1600	0.02375	0	0	0	0	1	0	0	0	1	NO	NO	NO	NA	NA	NO	NO	NO	NO	NO	NO	NA	NA	19.6	NA	641	10	655	0.0152672	915	28	945	0.0296296	0.0680975	24	24	Artifact (8)
IT_10	1	115258732	CT	C	NRAS	ENST00000369535	frameshift_variant	aaa/|p.Ser17fs/c.48delA	1525	48	1584	0.030303	0	0	0	0	1	0	0	0	1	NO	NO	NO	NA	NA	NO	NO	NO	NO	NO	NO	NA	NA	19.53	NA	658	27	690	0.0391304	867	21	894	0.0234899	0.0771165	24	24	Artifact (8)
IT_12	1	115258732	CT	C	NRAS	ENST00000369535	frameshift_variant	aaa/|p.Ser17fs/c.48delA	1487	30	1524	0.019685	0	0	0	0	1	0	0	0	1	NO	NO	NO	NA	NA	NO	NO	NO	NO	NO	NO	NA	NA	22.76	NA	652	13	667	0.0194903	835	17	857	0.0198366	1	24	24	Artifact (10)
IT_15	1	115258732	CT	C	NRAS	ENST00000369535	frameshift_variant	aaa/|p.Ser17fs/c.48delA	4518	70	4621	0.0151482	0	0	0	0	1	0	0	0	1	NO	NO	NO	NA	NA	NO	NO	NO	NO	NO	NO	NA	NA	23.1	NA	1923	15	1947	0.00770416	2595	55	2674	0.0205684	0.000338651	24	24	Artifact (10)
IT_16	1	115258732	CT	C	NRAS	ENST00000369535	frameshift_variant	aaa/|p.Ser17fs/c.48delA	2885	61	2963	0.0205872	0	0	0	0	1	0	0	0	1	NO	NO	NO	NA	NA	NO	NO	NO	NO	NO	NO	NA	NA	22.08	NA	1001	15	1017	0.0147493	1884	46	1946	0.0236382	0.104357	24	24	Artifact (8)
IT_05	1	115258732	CT	C	NRAS	ENST00000369535	frameshift_variant	aaa/|p.Ser17fs/c.48delA	1747	27	1780	0.0151685	0	0	0	0	1	0	0	0	1	NO	NO	NO	NA	NA	NO	NO	NO	NO	NO	NO	NA	NA	19.1	NA	658	9	668	0.0134731	1089	18	1112	0.0161871	0.694383	24	24	Artifact (10)
IT_06	1	115258732	CT	C	NRAS	ENST00000369535	frameshift_variant	aaa/|p.Ser17fs/c.48delA	1392	37	1436	0.025766	0	0	0	0	1	0	0	0	1	NO	NO	NO	NA	NA	NO	NO	NO	NO	NO	NO	NA	NA	19.86	NA	619	11	630	0.0174603	773	26	806	0.0322581	0.0928024	24	24	Artifact (8)
IT_17	1	115258732	CT	C	NRAS	ENST00000369535	frameshift_variant	aaa/|p.Ser17fs/c.48delA	1089	35	1130	0.0309735	0	0	0	0	1	0	0	0	1	NO	NO	NO	NA	NA	NO	NO	NO	NO	NO	NO	NA	NA	22.65	NA	538	2	541	0.00369686	551	33	589	0.0560272	4.41911e-08	24	24	Artifact (9)
IT_18	1	115258732	CT	C	NRAS	ENST00000369535	frameshift_variant	aaa/|p.Ser17fs/c.48delA	681	21	703	0.029872	0	0	0	0	1	0	0	0	1	NO	NO	NO	NA	NA	NO	NO	NO	NO	NO	NO	NA	NA	21.19	NA	269	1	270	0.0037037	412	20	433	0.0461894	0.000869879	24	24	Artifact (9)
IT_19	1	115258732	CT	C	NRAS	ENST00000369535	frameshift_variant	aaa/|p.Ser17fs/c.48delA	5453	131	5601	0.0233887	0	0	0	0	1	0	0	0	1	NO	NO	NO	NA	NA	NO	NO	NO	NO	NO	NO	NA	NA	21.14	NA	1857	11	1869	0.0058855	3596	120	3732	0.0321543	1.36392e-11	24	24	Artifact (8)
IT_20	1	115258732	CT	C	NRAS	ENST00000369535	frameshift_variant	aaa/|p.Ser17fs/c.48delA	1140	34	1179	0.028838	0	0	0	0	1	0	0	0	1	NO	NO	NO	NA	NA	NO	NO	NO	NO	NO	NO	NA	NA	22.15	NA	471	5	476	0.0105042	669	29	703	0.0412518	0.00129172	24	24	Artifact (8)
IT_22	1	115258732	CT	C	NRAS	ENST00000369535	frameshift_variant	aaa/|p.Ser17fs/c.48delA	1646	27	1685	0.0160237	0	0	0	0	1	0	0	0	1	NO	NO	NO	NA	NA	NO	NO	NO	NO	NO	NO	NA	NA	21.59	NA	591	2	593	0.00337268	1055	25	1092	0.0228938	0.0016983	24	24	Artifact (11)
IT_23	1	115258744	C	T	NRAS	ENST00000369535	missense_variant	gGt/gAt|p.Gly13Asp/c.38G>A	1695	21	1720	0.0122093	0	0	0	0	1	0	0	1	2	NO	NO	COSM573	endometrium, haematopoietic_and_lymphoid_tissue, large_intestine, NS, skin, thyroid, upper_aerodigestive_tract	1, 217, 10, 278, 26, 1, 2	NO	rs121434596	YES	8.236e-06	NO	NO	-5.441	Deleterious	26.42	30.67	696	8	705	0.0113475	999	13	1015	0.0128079	0.827681	4	4	Artifact (0)
IT_15	1	115258746	A	AC	NRAS	ENST00000369535	frameshift_variant	gca/gcaG|p.Gly13fs/c.33_34insG	4592	47	4600	0.0102174	0	0	0	0	1	0	0	0	1	NO	NO	NO	NA	NA	NO	NO	NO	NO	NO	NO	NA	NA	29.84	NA	1904	34	1908	0.0178197	2688	13	2692	0.00482912	3.49773e-05	1	1	Artifact (2)
IT_07	1	115258766	G	GT	NRAS	ENST00000369535	frameshift_variant	aaa/aAaa|p.Leu6fs/c.13dupA	2066	24	2069	0.0115998	0	0	0	0	1	0	0	0	1	NO	NO	NO	NA	NA	NO	NO	NO	NO	NO	NO	NA	NA	28.95	NA	827	20	828	0.0241546	1239	4	1241	0.00322321	2.3105e-05	5	12	Artifact (9)
IT_08	1	115258766	G	GT	NRAS	ENST00000369535	frameshift_variant	aaa/aAaa|p.Leu6fs/c.13dupA	1734	23	1736	0.0132488	0	0	0	0	1	0	0	0	1	NO	NO	NO	NA	NA	NO	NO	NO	NO	NO	NO	NA	NA	29.08	NA	664	22	666	0.033033	1070	1	1070	0.000934579	1.22309e-08	5	12	Artifact (9)
IT_09	1	115258766	G	GT	NRAS	ENST00000369535	frameshift_variant	aaa/aAaa|p.Leu6fs/c.13dupA	1604	20	1607	0.0124456	0	0	0	0	1	0	0	0	1	NO	NO	NO	NA	NA	NO	NO	NO	NO	NO	NO	NA	NA	28.92	NA	638	12	641	0.0187207	966	8	966	0.00828157	0.10536	5	12	Artifact (8)
IT_21	1	115258766	G	GT	NRAS	ENST00000369535	frameshift_variant	aaa/aAaa|p.Leu6fs/c.13dupA	1499	37	1501	0.0246502	0	0	0	0	1	0	0	0	1	NO	NO	NO	NA	NA	NO	NO	NO	NO	NO	NO	NA	NA	30.09	NA	624	36	626	0.057508	875	1	875	0.00114286	7.82921e-13	5	12	Artifact (7)
IT_10	1	115258766	GT	G	NRAS	ENST00000369535	frameshift_variant	aaa/|p.Lys5fs/c.14delA	1574	20	1601	0.0124922	0	0	0	0	1	0	0	0	1	NO	NO	NO	NA	NA	NO	NO	NO	NO	NO	NO	NA	NA	23.66	NA	657	17	679	0.0250368	917	3	922	0.0032538	0.000115508	7	12	Artifact (9)
IT_15	1	115258766	GT	G	NRAS	ENST00000369535	frameshift_variant	aaa/|p.Lys5fs/c.14delA	4527	48	4582	0.0104758	0	0	0	0	1	0	0	0	1	NO	NO	NO	NA	NA	NO	NO	NO	NO	NO	NO	NA	NA	26.76	NA	1809	42	1856	0.0226293	2718	6	2726	0.00220103	2.80918e-11	7	12	Artifact (9)
IT_24	2	25457159	C	CA	DNMT3A	ENST00000264709	frameshift_variant	ttt/tTtt|p.Ala910fs/c.2725dupT	1344	26	1345	0.0193309	0	0	0	0	1	0	0	0	1	NO	NO	NO	NA	NA	NO	NO	NO	NO	NO	NO	NA	NA	28.84	NA	665	4	666	0.00600601	679	22	679	0.0324006	0.000517432	2	18	Artifact (7)
IT_15	2	25457159	C	CA	DNMT3A	ENST00000264709	frameshift_variant	ttt/tTtt|p.Ala910fs/c.2725dupT	5487	65	5492	0.0118354	0	0	0	0	1	0	0	0	1	NO	NO	NO	NA	NA	NO	NO	NO	NO	NO	NO	NA	NA	29.67	NA	2822	33	2825	0.0116814	2665	32	2667	0.0119985	1	2	18	Artifact (6)
IT_23	2	25457159	CA	C	DNMT3A	ENST00000264709	frameshift_variant	ttt/|p.Phe909fs/c.2726delT	3118	63	3184	0.0197864	0	0	0	0	1	0	0	0	1	NO	NO	NO	NA	NA	NO	NO	NO	NO	NO	NO	NA	NA	23.01	NA	1429	43	1474	0.0291723	1689	20	1710	0.0116959	0.000486163	16	18	Artifact (11)
IT_01	2	25457159	CA	C	DNMT3A	ENST00000264709	frameshift_variant	ttt/|p.Phe909fs/c.2726delT	2088	65	2155	0.0301624	0	0	0	0	1	0	0	0	1	NO	NO	NO	NA	NA	NO	NO	NO	NO	NO	NO	NA	NA	23.24	NA	1040	53	1093	0.0484904	1048	12	1062	0.0112994	2.27152e-07	16	18	Artifact (9)
IT_02	2	25457159	CA	C	DNMT3A	ENST00000264709	frameshift_variant	ttt/|p.Phe909fs/c.2726delT	1032	42	1075	0.0390698	0	0	0	0	1	0	0	0	1	NO	NO	NO	NA	NA	NO	NO	NO	NO	NO	NO	NA	NA	22.88	NA	510	31	542	0.0571956	522	11	533	0.0206379	0.002411	16	18	Artifact (9)
IT_07	2	25457159	CA	C	DNMT3A	ENST00000264709	frameshift_variant	ttt/|p.Phe909fs/c.2726delT	2804	70	2877	0.0243309	0	0	0	0	1	0	0	0	1	NO	NO	NO	NA	NA	NO	NO	NO	NO	NO	NO	NA	NA	21.29	NA	1368	54	1425	0.0378947	1436	16	1452	0.0110193	2.45057e-06	16	18	Artifact (9)
IT_08	2	25457159	CA	C	DNMT3A	ENST00000264709	frameshift_variant	ttt/|p.Phe909fs/c.2726delT	2076	37	2114	0.0175024	0	0	0	0	1	0	0	0	1	NO	NO	NO	NA	NA	NO	NO	NO	NO	NO	NO	NA	NA	21.15	NA	991	30	1022	0.0293542	1085	7	1092	0.00641026	4.47759e-05	16	18	Artifact (12)
IT_09	2	25457159	CA	C	DNMT3A	ENST00000264709	frameshift_variant	ttt/|p.Phe909fs/c.2726delT	2970	63	3038	0.0207373	0	0	0	0	1	0	0	0	1	NO	NO	NO	NA	NA	NO	NO	NO	NO	NO	NO	NA	NA	22.52	NA	1496	25	1522	0.0164258	1474	38	1516	0.025066	0.0989648	16	18	Artifact (9)
IT_10	2	25457159	CA	C	DNMT3A	ENST00000264709	frameshift_variant	ttt/|p.Phe909fs/c.2726delT	2466	49	2519	0.0194522	0	0	0	0	1	0	0	0	1	NO	NO	NO	NA	NA	NO	NO	NO	NO	NO	NO	NA	NA	22.97	NA	1319	26	1348	0.0192878	1147	23	1171	0.0196413	1	16	18	Artifact (11)
IT_05	2	25457159	CA	C	DNMT3A	ENST00000264709	frameshift_variant	ttt/|p.Phe909fs/c.2726delT	4585	63	4650	0.0135484	0	0	0	0	1	0	0	0	1	NO	NO	NO	NA	NA	NO	NO	NO	NO	NO	NO	NA	NA	23.21	NA	2266	45	2312	0.0194637	2319	18	2338	0.00769889	0.000535123	16	18	Artifact (11)
IT_06	2	25457159	CA	C	DNMT3A	ENST00000264709	frameshift_variant	ttt/|p.Phe909fs/c.2726delT	3053	39	3095	0.012601	0	0	0	0	1	0	0	0	1	NO	NO	NO	NA	NA	NO	NO	NO	NO	NO	NO	NA	NA	22.9	NA	1447	28	1476	0.0189702	1606	11	1619	0.00679432	0.0031889	16	18	Artifact (11)
IT_17	2	25457159	CA	C	DNMT3A	ENST00000264709	frameshift_variant	ttt/|p.Phe909fs/c.2726delT	1612	41	1655	0.0247734	0	0	0	0	1	0	0	0	1	NO	NO	NO	NA	NA	NO	NO	NO	NO	NO	NO	NA	NA	24.12	NA	839	21	861	0.0243902	773	20	794	0.0251889	1	16	18	Artifact (9)
IT_18	2	25457159	CA	C	DNMT3A	ENST00000264709	frameshift_variant	ttt/|p.Phe909fs/c.2726delT	1093	20	1113	0.0179695	0	0	0	0	1	0	0	0	1	NO	NO	NO	NA	NA	NO	NO	NO	NO	NO	NO	NA	NA	24.82	NA	559	7	566	0.0123675	534	13	547	0.023766	0.179041	16	18	Artifact (11)
IT_19	2	25457159	CA	C	DNMT3A	ENST00000264709	frameshift_variant	ttt/|p.Phe909fs/c.2726delT	6553	156	6713	0.0232385	0	0	0	0	1	0	0	0	1	NO	NO	NO	NA	NA	NO	NO	NO	NO	NO	NO	NA	NA	23.37	NA	3208	103	3311	0.0311084	3345	53	3402	0.0155791	3.08433e-05	16	18	Artifact (9)
IT_20	2	25457159	CA	C	DNMT3A	ENST00000264709	frameshift_variant	ttt/|p.Phe909fs/c.2726delT	1254	30	1286	0.0233281	0	0	0	0	1	0	0	0	1	NO	NO	NO	NA	NA	NO	NO	NO	NO	NO	NO	NA	NA	23.61	NA	618	22	640	0.034375	636	8	646	0.0123839	0.00961102	16	18	Artifact (9)
IT_24	2	25457167	T	TA	DNMT3A	ENST00000264709	frameshift_variant	gag/gTag|p.Glu907fs/c.2719_2720insT	1341	33	1347	0.0244989	0	0	0	0	1	0	0	0	1	NO	NO	NO	NA	NA	NO	NO	NO	NO	NO	NO	NA	NA	29.99	NA	659	31	663	0.0467572	682	2	684	0.00292398	9.73434e-08	5	5	Artifact (6)
IT_14	2	25457167	T	TA	DNMT3A	ENST00000264709	frameshift_variant	gag/gTag|p.Glu907fs/c.2719_2720insT	1587	20	1589	0.0125865	0	0	0	0	1	0	0	0	1	NO	NO	NO	NA	NA	NO	NO	NO	NO	NO	NO	NA	NA	32.77	NA	844	19	846	0.0224586	743	1	743	0.0013459	0.000119147	5	5	Artifact (8)
IT_15	2	25457167	T	TA	DNMT3A	ENST00000264709	frameshift_variant	gag/gTag|p.Glu907fs/c.2719_2720insT	5478	118	5484	0.0215171	0	0	0	0	1	0	0	0	1	NO	NO	NO	NA	NA	NO	NO	NO	NO	NO	NO	NA	NA	30.56	NA	2804	118	2809	0.0420078	2674	0	2675	0	1.91533e-34	5	5	Artifact (6)
IT_16	2	25457167	T	TA	DNMT3A	ENST00000264709	frameshift_variant	gag/gTag|p.Glu907fs/c.2719_2720insT	3606	40	3615	0.011065	0	0	0	0	1	0	0	0	1	NO	NO	NO	NA	NA	NO	NO	NO	NO	NO	NO	NA	NA	30.64	NA	1821	37	1826	0.0202629	1785	3	1789	0.00167691	2.02921e-08	5	5	Artifact (8)
IT_15	2	25457191	C	CG	DNMT3A	ENST00000264709	frameshift_variant	atc/atCc|p.Arg899fs/c.2693_2694insC	5475	63	5485	0.0114859	0	0	0	0	1	0	0	0	1	NO	NO	NO	NA	NA	NO	NO	NO	NO	NO	NO	NA	NA	28.22	NA	2774	13	2778	0.00467963	2701	50	2707	0.0184706	1.4603e-06	3	3	Artifact (5)
IT_08	2	25457217	GC	G	DNMT3A	ENST00000264709	frameshift_variant	ggc/|p.Gly890fs/c.2668delG	2082	22	2106	0.0104463	0	0	0	0	1	0	0	0	1	NO	NO	NO	NO	O	NO	NO	NO	NO	NO	NO	NA	NA	24.47	NA	987	8	995	0.0080402	1095	14	1111	0.0126013	0.391727	1	1	Artifact (5)
IT_14	2	25457225	GT	G	DNMT3A	ENST00000264709	frameshift_variant	aga/|p.Arg887fs/c.2661delA	1550	24	1580	0.0151899	0	0	0	0	1	0	0	0	1	NO	NO	NO	NO	O	NO	NO	NO	NO	NO	NO	NA	NA	27.97	NA	792	24	820	0.0292683	758	0	760	0	1.40394e-07	3	3	Artifact (6)
IT_23	2	25457226	T	TC	DNMT3A	ENST00000264709	frameshift_variant	aga/aGga|p.Leu888fs/c.2659_2660insG	3124	47	3136	0.0149872	0	0	0	0	1	0	0	0	1	NO	NO	NO	NO	O	NO	NO	NO	NO	NO	NO	NA	NA	27.21	NA	1394	46	1398	0.0329041	1730	1	1738	0.000575374	3.01659e-15	23	23	Artifact (11)
IT_24	2	25457226	T	TC	DNMT3A	ENST00000264709	frameshift_variant	aga/aGga|p.Leu888fs/c.2659_2660insG	1321	32	1346	0.0237741	0	0	0	0	1	0	0	0	1	NO	NO	NO	NO	O	NO	NO	NO	NO	NO	NO	NA	NA	27.32	NA	601	31	625	0.0496	720	1	721	0.00138696	6.77031e-10	23	23	Artifact (9)
IT_01	2	25457226	T	TC	DNMT3A	ENST00000264709	frameshift_variant	aga/aGga|p.Leu888fs/c.2659_2660insG	2140	23	2147	0.0107126	0	0	0	0	1	0	0	0	1	NO	NO	NO	NO	O	NO	NO	NO	NO	NO	NO	NA	NA	28.28	NA	1063	21	1067	0.0196813	1077	2	1080	0.00185185	6.09827e-05	23	23	Artifact (11)
IT_07	2	25457226	T	TC	DNMT3A	ENST00000264709	frameshift_variant	aga/aGga|p.Leu888fs/c.2659_2660insG	2845	32	2849	0.011232	0	0	0	0	1	0	0	0	1	NO	NO	NO	NO	O	NO	NO	NO	NO	NO	NO	NA	NA	28.23	NA	1362	26	1364	0.0190616	1483	6	1485	0.0040404	0.00023137	23	23	Artifact (11)
IT_08	2	25457226	T	TC	DNMT3A	ENST00000264709	frameshift_variant	aga/aGga|p.Leu888fs/c.2659_2660insG	2086	22	2091	0.0105213	0	0	0	0	1	0	0	0	1	NO	NO	NO	NO	O	NO	NO	NO	NO	NO	NO	NA	NA	28.08	NA	974	22	976	0.022541	1112	0	1115	0	6.06524e-08	23	23	Artifact (11)
IT_09	2	25457226	T	TC	DNMT3A	ENST00000264709	frameshift_variant	aga/aGga|p.Leu888fs/c.2659_2660insG	3028	32	3047	0.0105021	0	0	0	0	1	0	0	0	1	NO	NO	NO	NO	O	NO	NO	NO	NO	NO	NO	NA	NA	28.65	NA	1468	28	1480	0.0189189	1560	4	1567	0.00255265	7.11041e-06	23	23	Artifact (11)
IT_10	2	25457226	T	TC	DNMT3A	ENST00000264709	frameshift_variant	aga/aGga|p.Leu888fs/c.2659_2660insG	2497	43	2509	0.0171383	0	0	0	0	1	0	0	0	1	NO	NO	NO	NO	O	NO	NO	NO	NO	NO	NO	NA	NA	28.2	NA	1290	37	1299	0.0284834	1207	6	1210	0.00495868	3.66351e-06	23	23	Artifact (11)
IT_11	2	25457226	T	TC	DNMT3A	ENST00000264709	frameshift_variant	aga/aGga|p.Leu888fs/c.2659_2660insG	1164	35	1168	0.0299658	0	0	0	0	1	0	0	0	1	NO	NO	NO	NO	O	NO	NO	NO	NO	NO	NO	NA	NA	28.31	NA	590	33	594	0.0555556	574	2	574	0.00348432	4.53993e-08	23	23	Artifact (9)
IT_12	2	25457226	T	TC	DNMT3A	ENST00000264709	frameshift_variant	aga/aGga|p.Leu888fs/c.2659_2660insG	2434	55	2441	0.0225317	0	0	0	0	1	0	0	0	1	NO	NO	NO	NO	O	NO	NO	NO	NO	NO	NO	NA	NA	28.06	NA	1163	55	1168	0.047089	1271	0	1273	0	4.49447e-18	23	23	Artifact (9)
IT_13	2	25457226	T	TC	DNMT3A	ENST00000264709	frameshift_variant	aga/aGga|p.Leu888fs/c.2659_2660insG	1103	23	1125	0.0204444	0	0	0	0	1	0	0	0	1	NO	NO	NO	NO	O	NO	NO	NO	NO	NO	NO	NA	NA	28.35	NA	558	23	579	0.0397237	545	0	546	0	2.42501e-07	23	23	Artifact (9)
IT_14	2	25457226	T	TC	DNMT3A	ENST00000264709	frameshift_variant	aga/aGga|p.Leu888fs/c.2659_2660insG	1550	54	1580	0.0341772	0	0	0	0	1	0	0	0	1	NO	NO	NO	NO	O	NO	NO	NO	NO	NO	NO	NA	NA	27.97	NA	792	53	820	0.0646341	758	1	760	0.00131579	2.36025e-14	23	23	Artifact (9)
IT_15	2	25457226	T	TC	DNMT3A	ENST00000264709	frameshift_variant	aga/aGga|p.Leu888fs/c.2659_2660insG	5422	77	5465	0.0140897	0	0	0	0	1	0	0	0	1	NO	NO	NO	NO	O	NO	NO	NO	NO	NO	NO	NA	NA	28.65	NA	2621	71	2661	0.0266817	2801	6	2804	0.0021398	3.13162e-16	23	23	Artifact (11)
IT_16	2	25457226	T	TC	DNMT3A	ENST00000264709	frameshift_variant	aga/aGga|p.Leu888fs/c.2659_2660insG	3577	54	3591	0.0150376	0	0	0	0	1	0	0	0	1	NO	NO	NO	NO	O	NO	NO	NO	NO	NO	NO	NA	NA	28.8	NA	1729	51	1741	0.0292935	1848	3	1850	0.00162162	5.61617e-13	23	23	Artifact (11)
IT_05	2	25457226	T	TC	DNMT3A	ENST00000264709	frameshift_variant	aga/aGga|p.Leu888fs/c.2659_2660insG	4634	64	4652	0.0137575	0	0	0	0	1	0	0	0	1	NO	NO	NO	NO	O	NO	NO	NO	NO	NO	NO	NA	NA	27.37	NA	2246	64	2258	0.0283437	2388	0	2394	0	1.18413e-20	23	23	Artifact (11)
IT_06	2	25457226	T	TC	DNMT3A	ENST00000264709	frameshift_variant	aga/aGga|p.Leu888fs/c.2659_2660insG	3057	54	3073	0.0175724	0	0	0	0	1	0	0	0	1	NO	NO	NO	NO	O	NO	NO	NO	NO	NO	NO	NA	NA	27.52	NA	1407	52	1419	0.0366455	1650	2	1654	0.00120919	3.04211e-15	23	23	Artifact (11)
IT_17	2	25457226	T	TC	DNMT3A	ENST00000264709	frameshift_variant	aga/aGga|p.Leu888fs/c.2659_2660insG	1636	36	1643	0.0219111	0	0	0	0	1	0	0	0	1	NO	NO	NO	NO	O	NO	NO	NO	NO	NO	NO	NA	NA	28.1	NA	817	33	824	0.0400485	819	3	819	0.003663	1.96571e-07	23	23	Artifact (9)
IT_18	2	25457226	T	TC	DNMT3A	ENST00000264709	frameshift_variant	aga/aGga|p.Leu888fs/c.2659_2660insG	1091	24	1099	0.021838	0	0	0	0	1	0	0	0	1	NO	NO	NO	NO	O	NO	NO	NO	NO	NO	NO	NA	NA	28.27	NA	535	24	543	0.0441989	556	0	556	0	9.2766e-08	23	23	Artifact (9)
IT_19	2	25457226	T	TC	DNMT3A	ENST00000264709	frameshift_variant	aga/aGga|p.Leu888fs/c.2659_2660insG	6632	111	6645	0.0167043	0	0	0	0	1	0	0	0	1	NO	NO	NO	NO	O	NO	NO	NO	NO	NO	NO	NA	NA	29.05	NA	3170	101	3183	0.0317311	3462	10	3462	0.0028885	8.34249e-22	23	23	Artifact (10)
IT_21	2	25457226	T	TC	DNMT3A	ENST00000264709	frameshift_variant	aga/aGga|p.Leu888fs/c.2659_2660insG	2088	61	2095	0.0291169	0	0	0	0	1	0	0	0	1	NO	NO	NO	NO	O	NO	NO	NO	NO	NO	NO	NA	NA	28.38	NA	1016	57	1022	0.055773	1072	4	1073	0.00372787	1.24772e-13	23	23	Artifact (9)
IT_22	2	25457226	T	TC	DNMT3A	ENST00000264709	frameshift_variant	aga/aGga|p.Leu888fs/c.2659_2660insG	2605	94	2611	0.0360015	0	0	0	0	1	0	0	0	1	NO	NO	NO	NO	O	NO	NO	NO	NO	NO	NO	NA	NA	28.12	NA	1272	93	1276	0.072884	1333	1	1335	0.000749064	3.17434e-27	23	23	Artifact (9)
IT_24	2	25457228	T	TC	DNMT3A	ENST00000264709	frameshift_variant	cag/caGg|p.Arg887fs/c.2657_2658insG	1328	24	1332	0.018018	0	0	0	0	1	0	0	0	1	NO	NO	NO	NO	O	NO	NO	NO	NO	NO	NO	NA	NA	26.96	NA	607	22	610	0.0360656	721	2	722	0.00277008	3.75695e-06	1	1	Artifact (6)
IT_09	2	25457236	GC	G	DNMT3A	ENST00000264709	frameshift_variant	gcg/|p.Ala884fs/c.2650delG	2411	606	3020	0.200662	1	1	0	0	1	1	0	0	4	NO	NO	NO	NA	NA	NO	NO	NO	NO	NO	NO	NA	NA	17.21	NA	1449	0	1449	0	962	606	1571	0.385742	1.68907e-203	2	4	Artifact (1)
IT_10	2	25457236	GC	G	DNMT3A	ENST00000264709	frameshift_variant	gcg/|p.Ala884fs/c.2650delG	1986	492	2481	0.198307	1	1	0	0	1	1	0	0	4	NO	NO	NO	NA	NA	NO	NO	NO	NO	NO	NO	NA	NA	17.05	NA	1265	0	1265	0	721	492	1216	0.404605	2.63307e-181	2	4	Artifact (1)
IT_23	2	25457238	CA	C	DNMT3A	ENST00000264709	frameshift_variant	ttg/|p.Leu883fs/c.2647delT	2967	93	3061	0.0303822	0	0	0	0	1	0	0	0	1	NO	NO	NO	NO	O	NO	NO	NO	NO	NO	NO	NA	NA	20.95	NA	1220	91	1312	0.0693598	1747	2	1749	0.00114351	7.54046e-32	19	19	Artifact (9)
IT_01	2	25457238	CA	C	DNMT3A	ENST00000264709	frameshift_variant	ttg/|p.Leu883fs/c.2647delT	2108	29	2139	0.0135577	0	0	0	0	1	0	0	0	1	NO	NO	NO	NO	O	NO	NO	NO	NO	NO	NO	NA	NA	19.76	NA	1023	29	1054	0.0275142	1085	0	1085	0	9.72438e-10	19	19	Artifact (11)
IT_07	2	25457238	CA	C	DNMT3A	ENST00000264709	frameshift_variant	ttg/|p.Leu883fs/c.2647delT	2731	95	2832	0.0335452	0	0	0	0	1	1	0	0	2	NO	NO	NO	NO	O	NO	NO	NO	NO	NO	NO	NA	NA	19.72	NA	1231	94	1329	0.0707299	1500	1	1503	0.000665336	1.0259e-30	19	19	Artifact (8)
IT_08	2	25457238	CA	C	DNMT3A	ENST00000264709	frameshift_variant	ttg/|p.Leu883fs/c.2647delT	1995	65	2063	0.0315075	0	0	0	0	1	0	0	0	1	NO	NO	NO	NO	O	NO	NO	NO	NO	NO	NO	NA	NA	20.26	NA	875	64	942	0.0679406	1120	1	1121	0.000892061	1.60664e-21	19	19	Artifact (9)
IT_11	2	25457238	CA	C	DNMT3A	ENST00000264709	frameshift_variant	ttg/|p.Leu883fs/c.2647delT	1104	42	1152	0.0364583	0	0	0	0	1	0	0	0	1	NO	NO	NO	NO	O	NO	NO	NO	NO	NO	NO	NA	NA	23.57	NA	529	42	577	0.0727903	575	0	575	0	8.95223e-14	19	19	Artifact (9)
IT_12	2	25457238	CA	C	DNMT3A	ENST00000264709	frameshift_variant	ttg/|p.Leu883fs/c.2647delT	2306	90	2403	0.0374532	0	0	0	0	1	0	0	0	1	NO	NO	NO	NO	O	NO	NO	NO	NO	NO	NO	NA	NA	24.13	NA	1030	90	1123	0.0801425	1276	0	1280	0	2.59935e-31	19	19	Artifact (9)
IT_13	2	25457238	CA	C	DNMT3A	ENST00000264709	frameshift_variant	ttg/|p.Leu883fs/c.2647delT	1066	43	1111	0.0387039	0	0	0	0	1	0	0	0	1	NO	NO	NO	NO	O	NO	NO	NO	NO	NO	NO	NA	NA	23	NA	519	43	563	0.0763766	547	0	548	0	1.15374e-13	19	19	Artifact (9)
IT_14	2	25457238	CA	C	DNMT3A	ENST00000264709	frameshift_variant	ttg/|p.Leu883fs/c.2647delT	1499	54	1557	0.0346821	0	0	0	0	1	0	0	0	1	NO	NO	NO	NO	O	NO	NO	NO	NO	NO	NO	NA	NA	23.31	NA	738	54	795	0.0679245	761	0	762	0	7.14479e-17	19	19	Artifact (9)
IT_15	2	25457238	CA	C	DNMT3A	ENST00000264709	frameshift_variant	ttg/|p.Leu883fs/c.2647delT	5320	73	5402	0.0135135	0	0	0	0	1	0	0	0	1	NO	NO	NO	NO	O	NO	NO	NO	NO	NO	NO	NA	NA	23.22	NA	2501	73	2582	0.0282727	2819	0	2820	0	2.069e-24	19	19	Artifact (11)
IT_16	2	25457238	CA	C	DNMT3A	ENST00000264709	frameshift_variant	ttg/|p.Leu883fs/c.2647delT	3487	39	3534	0.0110357	0	0	0	0	1	0	0	0	1	NO	NO	NO	NO	O	NO	NO	NO	NO	NO	NO	NA	NA	23.38	NA	1632	38	1673	0.0227137	1855	1	1861	0.000537346	7.86937e-12	19	19	Artifact (11)
IT_05	2	25457238	CA	C	DNMT3A	ENST00000264709	frameshift_variant	ttg/|p.Leu883fs/c.2647delT	4575	48	4626	0.0103761	0	0	0	0	1	0	0	0	1	NO	NO	NO	NO	O	NO	NO	NO	NO	NO	NO	NA	NA	21.25	NA	2173	48	2223	0.0215924	2402	0	2403	0	4.00089e-16	19	19	Artifact (11)
IT_17	2	25457238	CA	C	DNMT3A	ENST00000264709	frameshift_variant	ttg/|p.Leu883fs/c.2647delT	1560	57	1619	0.0352069	0	0	0	0	1	0	0	0	1	NO	NO	NO	NO	O	NO	NO	NO	NO	NO	NO	NA	NA	21.52	NA	737	57	796	0.071608	823	0	823	0	8.56234e-19	19	19	Artifact (9)
IT_18	2	25457238	CA	C	DNMT3A	ENST00000264709	frameshift_variant	ttg/|p.Leu883fs/c.2647delT	1062	28	1093	0.0256176	0	0	0	0	1	0	0	0	1	NO	NO	NO	NO	O	NO	NO	NO	NO	NO	NO	NA	NA	21.45	NA	506	28	534	0.0524345	556	0	559	0	1.453e-09	19	19	Artifact (9)
IT_19	2	25457238	CA	C	DNMT3A	ENST00000264709	frameshift_variant	ttg/|p.Leu883fs/c.2647delT	6490	91	6589	0.0138109	0	0	0	0	1	0	0	0	1	NO	NO	NO	NO	O	NO	NO	NO	NO	NO	NO	NA	NA	22.52	NA	3019	91	3113	0.0292323	3471	0	3476	0	1.17664e-30	19	19	Artifact (11)
IT_21	2	25457238	CA	C	DNMT3A	ENST00000264709	frameshift_variant	ttg/|p.Leu883fs/c.2647delT	2017	56	2073	0.027014	0	0	0	0	1	0	0	0	1	NO	NO	NO	NO	O	NO	NO	NO	NO	NO	NO	NA	NA	22.9	NA	935	56	991	0.0565086	1082	0	1082	0	4.87822e-19	19	19	Artifact (9)
IT_22	2	25457238	CA	C	DNMT3A	ENST00000264709	frameshift_variant	ttg/|p.Leu883fs/c.2647delT	2505	62	2573	0.0240964	0	0	0	0	1	0	0	0	1	NO	NO	NO	NO	O	NO	NO	NO	NO	NO	NO	NA	NA	22.34	NA	1167	62	1232	0.0503247	1338	0	1341	0	6.46643e-21	19	19	Artifact (9)
IT_23	2	25457241	G	GC	DNMT3A	ENST00000264709	frameshift_variant	cgc/cGgc|p.Ala884fs/c.2644_2645insG	3058	33	3060	0.0107843	0	0	0	0	1	0	0	0	1	NO	NO	NO	NO	O	NO	NO	NO	NO	NO	NO	NA	NA	24.51	NA	1310	32	1311	0.0244088	1748	1	1749	0.000571755	3.96758e-11	2	2	Artifact (6)
IT_11	2	25457266	T	TG	DNMT3A	ENST00000264709	frameshift_variant	tat/tCat|p.Tyr874fs/c.2620_2621insC	1724	21	1727	0.0121598	0	0	0	0	1	0	0	0	1	NO	NO	NO	NA	NA	NO	NO	NO	NO	NO	NO	NA	NA	31.72	NA	1081	21	1084	0.0193727	643	0	643	0	0.000101713	3	3	Artifact (6)
IT_12	2	25457266	T	TG	DNMT3A	ENST00000264709	frameshift_variant	tat/tCat|p.Tyr874fs/c.2620_2621insC	2989	37	2990	0.0123746	0	0	0	0	1	0	0	0	1	NO	NO	NO	NA	NA	NO	NO	NO	NO	NO	NO	NA	NA	32.13	NA	1634	37	1634	0.0226438	1355	0	1356	0	3.43782e-10	3	3	Artifact (6)
IT_21	2	25457266	T	TG	DNMT3A	ENST00000264709	frameshift_variant	tat/tCat|p.Tyr874fs/c.2620_2621insC	2182	23	2183	0.010536	0	0	0	0	1	0	0	0	1	NO	NO	NO	NA	NA	NO	NO	NO	NO	NO	NO	NA	NA	32.16	NA	1082	23	1082	0.0212569	1100	0	1101	0	2.12604e-07	3	3	Artifact (6)
IT_23	2	25457274	T	TG	DNMT3A	ENST00000264709	frameshift_variant	ttc/ttcC|p.Val872fs/c.2610dupC	1785	20	1801	0.0111049	0	0	0	0	1	0	0	0	1	NO	NO	NO	NO	O	NO	NO	NO	NO	NO	NO	NA	NA	28.47	NA	1085	15	1089	0.0137741	700	5	712	0.00702247	0.25142	23	23	Artifact (10)
IT_24	2	25457274	T	TG	DNMT3A	ENST00000264709	frameshift_variant	ttc/ttcC|p.Val872fs/c.2610dupC	697	39	697	0.0559541	0	0	0	0	1	0	0	0	1	NO	NO	NO	NO	O	NO	NO	NO	NO	NO	NO	NA	NA	25.39	NA	387	0	387	0	310	39	310	0.125806	7.06355e-14	23	23	Artifact (8)
IT_01	2	25457274	T	TG	DNMT3A	ENST00000264709	frameshift_variant	ttc/ttcC|p.Val872fs/c.2610dupC	1127	44	1131	0.0389036	0	0	0	0	1	0	0	0	1	NO	NO	NO	NO	O	NO	NO	NO	NO	NO	NO	NA	NA	27.59	NA	712	28	712	0.0393258	415	16	419	0.0381862	1	23	23	Artifact (8)
IT_07	2	25457274	T	TG	DNMT3A	ENST00000264709	frameshift_variant	ttc/ttcC|p.Val872fs/c.2610dupC	2086	22	2116	0.010397	0	0	0	0	1	0	0	0	1	NO	NO	NO	NO	O	NO	NO	NO	NO	NO	NO	NA	NA	29.7	NA	1225	14	1227	0.0114099	861	8	889	0.00899888	0.828231	23	23	Artifact (10)
IT_09	2	25457274	T	TG	DNMT3A	ENST00000264709	frameshift_variant	ttc/ttcC|p.Val872fs/c.2610dupC	2058	72	2071	0.0347658	0	0	0	0	1	0	0	0	1	NO	NO	NO	NO	O	NO	NO	NO	NO	NO	NO	NA	NA	27.39	NA	1081	48	1082	0.0443623	977	24	989	0.0242669	0.0219378	23	23	Artifact (8)
IT_10	2	25457274	T	TG	DNMT3A	ENST00000264709	frameshift_variant	ttc/ttcC|p.Val872fs/c.2610dupC	1848	46	1868	0.0246253	0	0	0	0	1	0	0	0	1	NO	NO	NO	NO	O	NO	NO	NO	NO	NO	NO	NA	NA	28.28	NA	1065	32	1068	0.0299625	783	14	800	0.0175	0.130119	23	23	Artifact (8)
IT_11	2	25457274	T	TG	DNMT3A	ENST00000264709	frameshift_variant	ttc/ttcC|p.Val872fs/c.2610dupC	1506	68	1520	0.0447368	0	0	0	0	1	0	0	0	1	NO	NO	NO	NO	O	NO	NO	NO	NO	NO	NO	NA	NA	27.3	NA	1136	49	1138	0.043058	370	19	382	0.0497382	0.565284	23	23	Artifact (8)
IT_12	2	25457274	T	TG	DNMT3A	ENST00000264709	frameshift_variant	ttc/ttcC|p.Val872fs/c.2610dupC	2247	77	2262	0.0340407	0	0	0	0	1	0	0	0	1	NO	NO	NO	NO	O	NO	NO	NO	NO	NO	NO	NA	NA	27.48	NA	1513	56	1517	0.036915	734	21	745	0.0281879	0.386424	23	23	Artifact (8)
IT_13	2	25457274	T	TG	DNMT3A	ENST00000264709	frameshift_variant	ttc/ttcC|p.Val872fs/c.2610dupC	736	36	738	0.0487805	0	0	0	0	1	0	0	1	2	NO	NO	NO	NO	O	NO	NO	NO	NO	NO	NO	NA	NA	26.8	NA	514	24	516	0.0465116	222	12	222	0.0540541	0.711551	23	23	Artifact (7)
IT_14	2	25457274	T	TG	DNMT3A	ENST00000264709	frameshift_variant	ttc/ttcC|p.Val872fs/c.2610dupC	895	31	898	0.0345212	0	0	0	0	1	0	0	0	1	NO	NO	NO	NO	O	NO	NO	NO	NO	NO	NO	NA	NA	26.46	NA	556	20	557	0.0359066	339	11	341	0.0322581	0.852473	23	23	Artifact (8)
IT_15	2	25457274	T	TG	DNMT3A	ENST00000264709	frameshift_variant	ttc/ttcC|p.Val872fs/c.2610dupC	2952	52	2955	0.0175973	0	0	0	0	1	0	0	0	1	NO	NO	NO	NO	O	NO	NO	NO	NO	NO	NO	NA	NA	25.48	NA	1532	1	1534	0.00065189	1420	51	1421	0.0358902	3.10323e-15	23	23	Artifact (11)
IT_16	2	25457274	T	TG	DNMT3A	ENST00000264709	frameshift_variant	ttc/ttcC|p.Val872fs/c.2610dupC	1888	61	1888	0.0323093	0	0	0	0	1	0	0	0	1	NO	NO	NO	NO	O	NO	NO	NO	NO	NO	NO	NA	NA	24.67	NA	899	2	899	0.00222469	989	59	989	0.0596562	4.71564e-14	23	23	Artifact (9)
IT_05	2	25457274	T	TG	DNMT3A	ENST00000264709	frameshift_variant	ttc/ttcC|p.Val872fs/c.2610dupC	1270	26	1272	0.0204403	0	0	0	0	1	0	0	0	1	NO	NO	NO	NO	O	NO	NO	NO	NO	NO	NO	NA	NA	28.21	NA	787	5	787	0.00635324	483	21	485	0.043299	1.54707e-05	23	23	Artifact (9)
IT_06	2	25457274	T	TG	DNMT3A	ENST00000264709	frameshift_variant	ttc/ttcC|p.Val872fs/c.2610dupC	1349	40	1354	0.0295421	0	0	0	0	1	0	0	1	2	NO	NO	NO	NO	O	NO	NO	NO	NO	NO	NO	NA	NA	28.2	NA	953	6	954	0.00628931	396	34	400	0.085	9.8624e-13	23	23	Artifact (8)
IT_17	2	25457274	T	TG	DNMT3A	ENST00000264709	frameshift_variant	ttc/ttcC|p.Val872fs/c.2610dupC	800	21	805	0.026087	0	0	0	0	1	0	0	1	2	NO	NO	NO	NO	O	NO	NO	NO	NO	NO	NO	NA	NA	26.78	NA	525	14	527	0.0265655	275	7	278	0.0251799	1	23	23	Artifact (7)
IT_18	2	25457274	T	TG	DNMT3A	ENST00000264709	frameshift_variant	ttc/ttcC|p.Val872fs/c.2610dupC	805	26	807	0.0322181	0	0	0	0	1	0	0	1	2	NO	NO	NO	NO	O	NO	NO	NO	NO	NO	NO	NA	NA	28.12	NA	603	22	603	0.0364842	202	4	204	0.0196078	0.356902	23	23	Artifact (7)
IT_22	2	25457274	T	TG	DNMT3A	ENST00000264709	frameshift_variant	ttc/ttcC|p.Val872fs/c.2610dupC	1669	27	1674	0.016129	0	0	0	0	1	0	0	1	2	NO	NO	NO	NO	O	NO	NO	NO	NO	NO	NO	NA	NA	28.01	NA	1029	22	1029	0.02138	640	5	645	0.00775194	0.0440902	23	23	Artifact (9)
IT_16	2	25457277	G	GGA	DNMT3A	ENST00000264709	frameshift_variant	ttc/ttTCc|p.Val872fs/c.2609_2610insTC	1873	21	1876	0.011194	0	0	0	0	1	0	0	0	1	NO	NO	NO	NO	O	NO	NO	NO	NO	NO	NO	NA	NA	20.97	NA	884	0	885	0	989	21	991	0.0211907	1.77061e-06	1	1	Artifact (6)
IT_16	2	25457281	C	A	DNMT3A	ENST00000264709	missense_variant	gGt/gTt|p.Gly869Val/c.2606G>T	1678	28	1708	0.0163934	0	0	0	0	1	0	0	0	1	NO	NO	NO	NA	NA	NO	NO	NO	NO	NO	NO	-8.796	Deleterious	23.83	21.46	718	1	720	0.00138889	960	27	988	0.0273279	6.27192e-06	1	1	Artifact (4)
IT_15	2	25457283	A	C	DNMT3A	ENST00000264709	missense_variant	ttT/ttG|p.Phe868Leu/c.2604T>G	302	30	337	0.0890208	0	0	0	0	1	0	0	0	1	NO	NO	NO	NO	O	NO	NO	NO	NO	NO	NO	-5.856	Deleterious	27.13	23.9	268	1	269	0.00371747	34	29	68	0.426471	4.8787e-23	2	2	Artifact (2)
IT_16	2	25457283	A	C	DNMT3A	ENST00000264709	missense_variant	ttT/ttG|p.Phe868Leu/c.2604T>G	52	32	84	0.380952	0	0	0	0	1	0	0	0	1	NO	NO	NO	NO	O	NO	NO	NO	NO	NO	NO	-5.856	Deleterious	26.67	25.03	46	0	46	0	6	32	38	0.842105	1.76788e-17	2	2	Artifact (1)
IT_23	2	25457285	A	C	DNMT3A	ENST00000264709	missense_variant	Ttt/Gtt|p.Phe868Val/c.2602T>G	603	36	640	0.05625	0	0	0	0	1	0	0	0	1	NO	NO	COSM1583131	haematopoietic_and_lymphoid_tissue	1	NO	NO	NO	NO	NO	NO	-6.839	Deleterious	19.49	21.97	583	0	584	0	20	36	56	0.642857	8.01767e-45	22	22	Artifact (5)
IT_01	2	25457285	A	C	DNMT3A	ENST00000264709	missense_variant	Ttt/Gtt|p.Phe868Val/c.2602T>G	402	24	426	0.056338	0	0	0	0	1	0	0	0	1	NO	NO	COSM1583131	haematopoietic_and_lymphoid_tissue	1	NO	NO	NO	NO	NO	NO	-6.839	Deleterious	18.85	21.12	369	0	369	0	33	24	57	0.421053	7.0782e-24	22	22	Artifact (5)
IT_07	2	25457285	A	C	DNMT3A	ENST00000264709	missense_variant	Ttt/Gtt|p.Phe868Val/c.2602T>G	475	57	533	0.106942	0	0	0	0	1	0	0	0	1	NO	NO	COSM1583131	haematopoietic_and_lymphoid_tissue	1	NO	NO	NO	NO	NO	NO	-6.839	Deleterious	19.67	22.21	448	0	449	0	27	57	84	0.678571	2.87119e-56	22	22	Artifact (5)
IT_08	2	25457285	A	C	DNMT3A	ENST00000264709	missense_variant	Ttt/Gtt|p.Phe868Val/c.2602T>G	444	43	489	0.0879346	0	0	0	0	1	0	0	0	1	NO	NO	COSM1583131	haematopoietic_and_lymphoid_tissue	1	NO	NO	NO	NO	NO	NO	-6.839	Deleterious	20.41	22.98	417	0	417	0	27	43	72	0.597222	2.0298e-43	22	22	Artifact (5)
IT_09	2	25457285	A	C	DNMT3A	ENST00000264709	missense_variant	Ttt/Gtt|p.Phe868Val/c.2602T>G	405	51	457	0.111597	0	0	0	0	1	0	0	0	1	NO	NO	COSM1583131	haematopoietic_and_lymphoid_tissue	1	NO	NO	NO	NO	NO	NO	-6.839	Deleterious	18.63	20.61	319	0	319	0	86	51	138	0.369565	9.34064e-31	22	22	Artifact (5)
IT_10	2	25457285	A	C	DNMT3A	ENST00000264709	missense_variant	Ttt/Gtt|p.Phe868Val/c.2602T>G	441	73	514	0.142023	0	0	0	0	1	0	0	0	1	NO	NO	COSM1583131	haematopoietic_and_lymphoid_tissue	1	NO	NO	NO	NO	NO	NO	-6.839	Deleterious	19.12	21.03	374	0	374	0	67	73	140	0.521429	9.99499e-50	22	22	Artifact (5)
IT_11	2	25457285	A	C	DNMT3A	ENST00000264709	missense_variant	Ttt/Gtt|p.Phe868Val/c.2602T>G	979	48	1027	0.0467381	0	0	0	0	1	0	0	0	1	NO	NO	COSM1583131	haematopoietic_and_lymphoid_tissue	1	NO	NO	NO	NO	NO	NO	-6.839	Deleterious	23.47	23.79	880	0	880	0	99	48	147	0.326531	1.57218e-44	22	22	Artifact (5)
IT_12	2	25457285	A	C	DNMT3A	ENST00000264709	missense_variant	Ttt/Gtt|p.Phe868Val/c.2602T>G	1065	39	1106	0.0352622	0	0	0	0	1	0	0	0	1	NO	NO	COSM1583131	haematopoietic_and_lymphoid_tissue	1	NO	NO	NO	NO	NO	NO	-6.839	Deleterious	23.67	24.05	969	0	971	0	96	39	135	0.288889	1.12878e-38	22	22	Artifact (5)
IT_06	2	25457285	A	C	DNMT3A	ENST00000264709	missense_variant	Ttt/Gtt|p.Phe868Val/c.2602T>G	734	21	755	0.0278146	0	0	0	0	1	0	0	0	1	NO	NO	COSM1583131	haematopoietic_and_lymphoid_tissue	1	NO	NO	NO	NO	NO	NO	-6.839	Deleterious	20.7	20.71	676	0	676	0	58	21	79	0.265823	1.84283e-22	22	22	Artifact (5)
IT_17	2	25457285	A	C	DNMT3A	ENST00000264709	missense_variant	Ttt/Gtt|p.Phe868Val/c.2602T>G	356	23	383	0.0600522	0	0	0	0	1	0	0	0	1	NO	NO	COSM1583131	haematopoietic_and_lymphoid_tissue	1	NO	NO	NO	NO	NO	NO	-6.839	Deleterious	22.13	22.87	311	0	312	0	45	23	71	0.323944	2.01266e-19	22	22	Artifact (5)
IT_18	2	25457285	A	C	DNMT3A	ENST00000264709	missense_variant	Ttt/Gtt|p.Phe868Val/c.2602T>G	489	21	510	0.0411765	0	0	0	0	1	0	0	0	1	NO	NO	COSM1583131	haematopoietic_and_lymphoid_tissue	1	NO	NO	NO	NO	NO	NO	-6.839	Deleterious	21.59	23.86	459	0	459	0	30	21	51	0.411765	1.22824e-23	22	22	Artifact (5)
IT_22	2	25457285	A	C	DNMT3A	ENST00000264709	missense_variant	Ttt/Gtt|p.Phe868Val/c.2602T>G	592	26	619	0.0420032	0	0	0	0	1	0	0	0	1	NO	NO	COSM1583131	haematopoietic_and_lymphoid_tissue	1	NO	NO	NO	NO	NO	NO	-6.839	Deleterious	24.79	22.58	538	0	539	0	54	26	80	0.325	1.43651e-25	22	22	Artifact (5)
IT_23	2	25457287	AC	A	DNMT3A	ENST00000264709	frameshift_variant	gta/|p.Val867fs/c.2599delG	369	285	657	0.43379	1	1	0	0	1	1	0	0	4	NO	NO	NO	NO	O	NO	NO	NO	8.236e-06	NO	NO	NA	NA	21.89	NA	301	282	585	0.482051	68	3	72	0.0416667	5.1027e-15	22	22	Artifact (4)
IT_24	2	25457287	AC	A	DNMT3A	ENST00000264709	frameshift_variant	gta/|p.Val867fs/c.2599delG	115	83	198	0.419192	1	1	1	0	1	1	0	0	5	NO	NO	NO	NO	O	NO	NO	NO	8.236e-06	NO	NO	NA	NA	24.18	NA	110	83	193	0.430052	5	0	5	0	0.0757261	22	22	Artifact (2)
IT_02	2	25457287	AC	A	DNMT3A	ENST00000264709	frameshift_variant	gta/|p.Val867fs/c.2599delG	50	43	93	0.462366	1	1	0	0	1	1	0	0	4	NO	NO	NO	NO	O	NO	NO	NO	8.236e-06	NO	NO	NA	NA	20.88	NA	35	43	78	0.551282	15	0	15	0	3.07539e-05	22	22	Artifact (4)
IT_03	2	25457287	AC	A	DNMT3A	ENST00000264709	frameshift_variant	gta/|p.Val867fs/c.2599delG	88	49	138	0.355072	1	1	0	0	1	1	0	0	4	NO	NO	NO	NO	O	NO	NO	NO	8.236e-06	NO	NO	NA	NA	23.49	NA	77	49	127	0.385827	11	0	11	0	0.00767332	22	22	Artifact (3)
IT_04	2	25457287	AC	A	DNMT3A	ENST00000264709	frameshift_variant	gta/|p.Val867fs/c.2599delG	105	42	148	0.283784	1	1	0	0	1	1	0	0	4	NO	NO	NO	NO	O	NO	NO	NO	8.236e-06	NO	NO	NA	NA	21.7	NA	84	42	127	0.330709	21	0	21	0	0.000544901	22	22	Artifact (4)
IT_07	2	25457287	AC	A	DNMT3A	ENST00000264709	frameshift_variant	gta/|p.Val867fs/c.2599delG	359	180	542	0.332103	1	1	0	0	1	1	0	0	4	NO	NO	NO	NO	O	NO	NO	NO	8.236e-06	NO	NO	NA	NA	20.54	NA	266	178	446	0.399103	93	2	96	0.0208333	5.16899e-16	22	22	Artifact (4)
IT_08	2	25457287	AC	A	DNMT3A	ENST00000264709	frameshift_variant	gta/|p.Val867fs/c.2599delG	307	190	499	0.380762	1	1	0	0	1	1	0	0	4	NO	NO	NO	NO	O	NO	NO	NO	8.236e-06	NO	NO	NA	NA	20.51	NA	224	190	416	0.456731	83	0	83	0	3.28819e-20	22	22	Artifact (4)
IT_09	2	25457287	AC	A	DNMT3A	ENST00000264709	frameshift_variant	gta/|p.Val867fs/c.2599delG	348	130	479	0.271399	1	0	0	0	1	1	0	0	3	NO	NO	NO	NO	O	NO	NO	NO	8.236e-06	NO	NO	NA	NA	17.81	NA	197	120	318	0.377358	151	10	161	0.0621118	4.18727e-15	22	22	Artifact (4)
IT_10	2	25457287	AC	A	DNMT3A	ENST00000264709	frameshift_variant	agg/|p.Val867fs/c.2598delG	427	90	523	0.172084	0	0	0	0	1	1	0	0	2	NO	NO	NO	NO	O	NO	NO	NO	8.236e-06	NO	NO	NA	NA	20.02	NA	281	86	372	0.231183	146	4	151	0.0264901	4.69893e-10	22	22	Artifact (5)
IT_11	2	25457287	AC	A	DNMT3A	ENST00000264709	frameshift_variant	gta/|p.Val867fs/c.2599delG	977	74	1057	0.0700095	1	1	0	0	1	1	0	0	4	NO	NO	NO	NO	O	NO	NO	NO	8.236e-06	NO	NO	NA	NA	24.33	NA	816	59	877	0.0672748	161	15	180	0.0833333	0.418913	22	22	Artifact (3)
IT_12	2	25457287	AC	A	DNMT3A	ENST00000264709	frameshift_variant	agg/|p.Val867fs/c.2598delG	1089	55	1152	0.0477431	0	0	0	0	1	0	0	0	1	NO	NO	NO	NO	O	NO	NO	NO	8.236e-06	NO	NO	NA	NA	24.94	NA	915	47	966	0.0486542	174	8	186	0.0430108	1	22	22	Artifact (6)
IT_15	2	25457287	AC	A	DNMT3A	ENST00000264709	frameshift_variant	gta/|p.Val867fs/c.2599delG	235	68	305	0.222951	0	1	0	0	1	1	0	0	3	NO	NO	NO	NO	O	NO	NO	NO	8.236e-06	NO	NO	NA	NA	23.13	NA	198	64	263	0.243346	37	4	42	0.0952381	0.0428782	22	22	Artifact (4)
IT_05	2	25457287	AC	A	DNMT3A	ENST00000264709	frameshift_variant	gta/|p.Val867fs/c.2599delG	266	73	341	0.214076	1	0	0	0	1	1	0	0	3	NO	NO	NO	NO	O	NO	NO	NO	8.236e-06	NO	NO	NA	NA	22.98	NA	233	73	307	0.237785	33	0	34	0	0.000471753	22	22	Artifact (5)
IT_06	2	25457287	AC	A	DNMT3A	ENST00000264709	frameshift_variant	gta/|p.Val867fs/c.2599delG	575	184	759	0.242424	1	0	0	0	1	1	0	0	3	NO	NO	NO	NO	O	NO	NO	NO	8.236e-06	NO	NO	NA	NA	22.64	NA	494	182	676	0.269231	81	2	83	0.0240964	1.7127e-08	22	22	Artifact (5)
IT_17	2	25457287	AC	A	DNMT3A	ENST00000264709	frameshift_variant	agg/|p.Val867fs/c.2598delG	373	23	401	0.0573566	0	0	0	0	1	0	0	0	1	NO	NO	NO	NO	O	NO	NO	NO	8.236e-06	NO	NO	NA	NA	22.91	NA	295	15	311	0.0482315	78	8	90	0.0888889	0.123011	22	22	Artifact (5)
IT_18	2	25457287	AC	A	DNMT3A	ENST00000264709	frameshift_variant	agg/|p.Val867fs/c.2598delG	506	21	528	0.0397727	0	0	0	0	1	0	0	0	1	NO	NO	NO	NO	O	NO	NO	NO	8.236e-06	NO	NO	NA	NA	24.2	NA	434	20	455	0.043956	72	1	73	0.0136986	0.336807	22	22	Artifact (7)
IT_22	2	25457287	AC	A	DNMT3A	ENST00000264709	frameshift_variant	agg/|p.Val867fs/c.2598delG	616	26	646	0.0402477	0	0	0	0	1	0	0	0	1	NO	NO	NO	NO	O	NO	NO	NO	8.236e-06	NO	NO	NA	NA	23.99	NA	522	17	540	0.0314815	94	9	106	0.0849057	0.0238927	22	22	Artifact (6)
IT_16	2	25458576	CT	C	DNMT3A	ENST00000264709	frameshift_variant	gaa/|p.Arg866fs/c.2595delA	1858	22	1887	0.0116587	0	0	0	0	1	0	0	0	1	NO	NO	NO	NA	NA	NO	NO	NO	NO	NO	NO	NA	NA	25.06	NA	910	19	929	0.0204521	948	3	958	0.00313152	0.000398714	6	6	Artifact (8)
IT_10	2	25458582	AT	A	DNMT3A	ENST00000264709	frameshift_variant	gaa/|p.Met864fs/c.2589delA	1113	22	1136	0.0193662	0	0	0	0	1	0	0	0	1	NO	NO	NO	NA	NA	NO	NO	NO	NO	NO	NO	NA	NA	23.92	NA	459	22	481	0.045738	654	0	655	0	4.72593e-09	10	10	Artifact (8)
IT_17	2	25458582	AT	A	DNMT3A	ENST00000264709	frameshift_variant	gaa/|p.Met864fs/c.2589delA	808	21	833	0.0252101	0	0	0	0	1	0	0	0	1	NO	NO	NO	NA	NA	NO	NO	NO	NO	NO	NO	NA	NA	25.23	NA	309	20	330	0.0606061	499	1	503	0.00198807	8.77152e-08	10	10	Artifact (6)
IT_01	2	25458600	A	AT	DNMT3A	ENST00000264709	frameshift_variant	gac/gacA|p.Ile858fs/c.2571_2572insA	2913	39	2913	0.0133883	0	0	0	0	1	0	0	0	1	NO	NO	NO	NO	O	NO	NO	NO	NO	NO	NO	NA	NA	30.2	NA	1437	3	1437	0.00208768	1476	36	1476	0.0243902	4.02837e-08	4	4	Artifact (8)
IT_17	2	25458600	A	AT	DNMT3A	ENST00000264709	frameshift_variant	gac/gacA|p.Ile858fs/c.2571_2572insA	2077	21	2079	0.010101	0	0	0	0	1	0	0	0	1	NO	NO	NO	NO	O	NO	NO	NO	NO	NO	NO	NA	NA	30.18	NA	955	10	956	0.0104603	1122	11	1123	0.00979519	1	4	4	Artifact (7)
IT_15	2	25458607	C	CT	DNMT3A	ENST00000264709	frameshift_variant	aaa/aAaa|p.Glu856fs/c.2563dupA	3366	35	3368	0.0103919	0	0	0	0	1	0	0	0	1	NO	NO	NO	NO	O	NO	NO	NO	NO	NO	NO	NA	NA	29.29	NA	1534	2	1534	0.00130378	1832	33	1834	0.0179935	3.77283e-07	3	3	Artifact (6)
IT_16	2	25458607	C	CT	DNMT3A	ENST00000264709	frameshift_variant	aaa/aAaa|p.Glu856fs/c.2563dupA	2012	22	2012	0.0109344	0	0	0	0	1	0	0	0	1	NO	NO	NO	NO	O	NO	NO	NO	NO	NO	NO	NA	NA	28.87	NA	972	0	972	0	1040	22	1040	0.0211538	6.34131e-07	3	3	Artifact (6)
IT_17	2	25458607	C	CT	DNMT3A	ENST00000264709	frameshift_variant	aaa/aAaa|p.Glu856fs/c.2563dupA	2084	29	2086	0.0139022	0	0	0	0	1	0	0	0	1	NO	NO	NO	NO	O	NO	NO	NO	NO	NO	NO	NA	NA	29.91	NA	955	4	956	0.0041841	1129	25	1130	0.0221239	0.000490328	3	3	Artifact (6)
IT_06	2	25458617	C	CA	DNMT3A	ENST00000264709	frameshift_variant	atg/aTtg|p.Met852fs/c.2554_2555insT	978	22	979	0.0224719	0	0	0	0	1	0	0	0	1	NO	NO	NO	NO	O	NO	NO	NO	NO	NO	NO	NA	NA	28.53	NA	428	1	428	0.00233645	550	21	551	0.0381125	9.51782e-05	1	1	Artifact (4)
IT_01	2	25458628	G	GA	DNMT3A	ENST00000264709	frameshift_variant	ttt/tTtt|p.Pro849fs/c.2542dupT	2175	62	2176	0.0284926	0	0	0	0	1	0	0	0	1	NO	NO	NO	NO	O	NO	NO	NO	NO	NO	NO	NA	NA	26.42	NA	1067	6	1068	0.00561798	1108	56	1108	0.0505415	7.45355e-11	12	13	Artifact (7)
IT_07	2	25458628	G	GA	DNMT3A	ENST00000264709	frameshift_variant	ttt/tTtt|p.Pro849fs/c.2542dupT	1210	25	1211	0.0206441	0	0	0	0	1	0	0	0	1	NO	NO	NO	NO	O	NO	NO	NO	NO	NO	NO	NA	NA	25.23	NA	568	4	568	0.00704225	642	21	643	0.0326594	0.00194535	12	13	Artifact (6)
IT_08	2	25458628	G	GA	DNMT3A	ENST00000264709	frameshift_variant	ttt/tTtt|p.Pro849fs/c.2542dupT	1079	23	1079	0.021316	0	0	0	0	1	0	0	0	1	NO	NO	NO	NO	O	NO	NO	NO	NO	NO	NO	NA	NA	25.22	NA	517	4	517	0.00773694	562	19	562	0.0338078	0.00491904	12	13	Artifact (6)
IT_09	2	25458628	G	GA	DNMT3A	ENST00000264709	frameshift_variant	ttt/tTtt|p.Pro849fs/c.2542dupT	1692	67	1692	0.0395981	0	0	0	0	1	0	0	0	1	NO	NO	NO	NO	O	NO	NO	NO	NO	NO	NO	NA	NA	24.85	NA	886	6	886	0.00677201	806	61	806	0.0756824	1.99731e-13	12	13	Artifact (7)
IT_10	2	25458628	G	GA	DNMT3A	ENST00000264709	frameshift_variant	ttt/tTtt|p.Pro849fs/c.2542dupT	1775	52	1778	0.0292463	0	0	0	0	1	0	0	0	1	NO	NO	NO	NO	O	NO	NO	NO	NO	NO	NO	NA	NA	25.36	NA	944	2	947	0.00211193	831	50	831	0.0601685	2.75929e-14	12	13	Artifact (7)
IT_18	2	25458628	G	GA	DNMT3A	ENST00000264709	frameshift_variant	ttt/tTtt|p.Pro849fs/c.2542dupT	1923	36	1923	0.0187207	0	0	0	0	1	0	0	0	1	NO	NO	NO	NO	O	NO	NO	NO	NO	NO	NO	NA	NA	27.93	NA	805	9	805	0.0111801	1118	27	1118	0.0241503	0.0588914	12	13	Artifact (8)
IT_21	2	25458628	G	GA	DNMT3A	ENST00000264709	frameshift_variant	ttt/tTtt|p.Pro849fs/c.2542dupT	655	23	656	0.035061	0	0	0	0	1	0	0	0	1	NO	NO	NO	NO	O	NO	NO	NO	NO	NO	NO	NA	NA	26.28	NA	361	3	361	0.00831025	294	20	295	0.0677966	5.9237e-05	12	13	Artifact (7)
IT_22	2	25458628	G	GA	DNMT3A	ENST00000264709	frameshift_variant	ttt/tTtt|p.Pro849fs/c.2542dupT	4142	53	4148	0.0127772	0	0	0	0	1	0	0	0	1	NO	NO	NO	NO	O	NO	NO	NO	NO	NO	NO	NA	NA	28.18	NA	1800	3	1803	0.00166389	2342	50	2345	0.021322	1.33566e-09	12	13	Artifact (9)
IT_18	2	25458640	C	CT	DNMT3A	ENST00000264709	frameshift_variant	aaa/aAaa|p.Asp845fs/c.2530dupA	1934	20	1934	0.0103413	0	0	0	0	1	0	0	0	1	NO	NO	NO	NO	O	NO	NO	NO	NO	NO	NO	NA	NA	31.11	NA	793	2	793	0.00252207	1141	18	1141	0.0157756	0.0047948	1	1	Artifact (6)
IT_09	2	25458644	G	GC	DNMT3A	ENST00000264709	frameshift_variant	cag/cagG|p.Lys844fs/c.2526dupG	1684	25	1686	0.014828	0	0	0	0	1	0	0	0	1	NO	NO	NO	NA	NA	NO	NO	NO	NO	NO	NO	NA	NA	27.97	NA	867	24	869	0.027618	817	1	817	0.00122399	2.01002e-06	6	7	Artifact (9)
IT_18	2	25458650	C	CT	DNMT3A	ENST00000264709	frameshift_variant	ata/ataA|p.Gln842fs/c.2520dupA	1939	37	1939	0.019082	0	0	0	0	1	0	0	0	1	NO	NO	NO	NA	NA	NO	NO	NO	NO	NO	NO	NA	NA	30.65	NA	784	0	784	0	1155	37	1155	0.0320346	1.0034e-08	6	6	Artifact (8)
IT_11	2	25458659	G	GT	DNMT3A	ENST00000264709	frameshift_variant	tca/tcaA|p.Asn838fs/c.2511dupA	2457	26	2458	0.0105777	0	0	0	0	1	0	0	0	1	NO	NO	NO	NA	NA	NO	NO	NO	8.236e-06	NO	NO	NA	NA	29.56	NA	1206	2	1207	0.001657	1251	24	1251	0.0191847	1.12303e-05	9	10	Artifact (8)
IT_18	2	25458659	G	GT	DNMT3A	ENST00000264709	frameshift_variant	tca/tcaA|p.Asn838fs/c.2511dupA	1942	34	1944	0.0174897	0	0	0	0	1	0	0	0	1	NO	NO	NO	NA	NA	NO	NO	NO	8.236e-06	NO	NO	NA	NA	28.86	NA	782	4	782	0.00511509	1160	30	1162	0.0258176	0.000561407	9	10	Artifact (8)
IT_24	2	25459824	T	TC	DNMT3A	ENST00000264709	frameshift_variant	ctg/ctGg|p.Glu820fs/c.2456_2457insG	2370	33	2378	0.0138772	0	0	0	0	1	0	0	0	1	NO	NO	NO	NA	NA	NO	NO	NO	NO	NO	NO	NA	NA	28.97	NA	1131	19	1134	0.0167549	1239	14	1244	0.011254	0.2947	1	1	Artifact (5)
IT_24	2	25459833	T	TC	DNMT3A	ENST00000264709	frameshift_variant	cag/caGg|p.Glu817fs/c.2447_2448insG	2375	24	2377	0.0100968	0	0	0	0	1	0	0	0	1	NO	NO	NO	NA	NA	NO	NO	NO	NO	NO	NO	NA	NA	28.18	NA	1129	13	1130	0.0115044	1246	11	1247	0.00882117	0.544156	2	2	Artifact (5)
IT_15	2	25459833	T	TC	DNMT3A	ENST00000264709	frameshift_variant	cag/caGg|p.Glu817fs/c.2447_2448insG	6313	78	6324	0.012334	0	0	0	0	1	0	0	0	1	NO	NO	NO	NA	NA	NO	NO	NO	NO	NO	NO	NA	NA	29.8	NA	3492	68	3496	0.0194508	2821	10	2828	0.00353607	2.74959e-09	2	2	Artifact (5)
IT_24	2	25459842	T	TC	DNMT3A	ENST00000264709	frameshift_variant	ctg/ctGg|p.Glu814fs/c.2438_2439insG	2369	44	2371	0.0185576	0	0	0	0	1	0	0	0	1	NO	NO	NO	NA	NA	NO	NO	NO	NO	NO	NO	NA	NA	28.24	NA	1119	38	1120	0.0339286	1250	6	1251	0.00479616	1.237e-07	6	6	Artifact (8)
IT_13	2	25459842	T	TC	DNMT3A	ENST00000264709	frameshift_variant	ctg/ctGg|p.Glu814fs/c.2438_2439insG	1485	26	1486	0.0174966	0	0	0	0	1	0	0	0	1	NO	NO	NO	NA	NA	NO	NO	NO	NO	NO	NO	NA	NA	30.24	NA	792	24	792	0.030303	693	2	694	0.00288184	3.19261e-05	6	6	Artifact (8)
IT_14	2	25459842	T	TC	DNMT3A	ENST00000264709	frameshift_variant	ctg/ctGg|p.Glu814fs/c.2438_2439insG	2147	49	2150	0.0227907	0	0	0	0	1	0	0	0	1	NO	NO	NO	NA	NA	NO	NO	NO	NO	NO	NO	NA	NA	29.91	NA	1135	48	1136	0.0422535	1012	1	1014	0.000986193	2.56326e-12	6	6	Artifact (6)
IT_06	2	25459842	T	TC	DNMT3A	ENST00000264709	frameshift_variant	ctg/ctGg|p.Glu814fs/c.2438_2439insG	3838	95	3849	0.0246817	0	0	0	0	1	0	0	0	1	NO	NO	NO	NA	NA	NO	NO	NO	NO	NO	NO	NA	NA	27.45	NA	2060	94	2067	0.0454765	1778	1	1782	0.000561167	6.37374e-24	6	6	Artifact (6)
IT_17	2	25459842	T	TC	DNMT3A	ENST00000264709	frameshift_variant	ctg/ctGg|p.Glu814fs/c.2438_2439insG	2335	24	2348	0.0102215	0	0	0	0	1	0	0	0	1	NO	NO	NO	NA	NA	NO	NO	NO	NO	NO	NO	NA	NA	30.99	NA	1199	20	1207	0.01657	1136	4	1141	0.0035057	0.00167385	6	6	Artifact (7)
IT_23	2	25459853	AT	A	DNMT3A	ENST00000264709	frameshift_variant	aat/|p.Asn810fs/c.2428delA	4273	165	4443	0.0371371	0	0	0	0	1	0	0	0	1	NO	NO	NO	NA	NA	NO	NO	NO	NO	NO	NO	NA	NA	22.78	NA	2123	106	2230	0.0475336	2150	59	2213	0.0266606	0.000247356	22	22	Artifact (8)
IT_24	2	25459853	AT	A	DNMT3A	ENST00000264709	frameshift_variant	aat/|p.Asn810fs/c.2428delA	2255	97	2355	0.041189	0	0	0	0	1	0	0	0	1	NO	NO	NO	NA	NA	NO	NO	NO	NO	NO	NO	NA	NA	23.74	NA	1023	77	1102	0.069873	1232	20	1253	0.0159617	2.50605e-11	22	22	Artifact (8)
IT_01	2	25459853	AT	A	DNMT3A	ENST00000264709	frameshift_variant	aat/|p.Asn810fs/c.2428delA	2767	60	2837	0.0211491	0	0	0	0	1	0	0	0	1	NO	NO	NO	NA	NA	NO	NO	NO	NO	NO	NO	NA	NA	22.25	NA	1480	47	1530	0.030719	1287	13	1307	0.00994644	0.000112416	22	22	Artifact (8)
IT_07	2	25459853	AT	A	DNMT3A	ENST00000264709	frameshift_variant	aat/|p.Asn810fs/c.2428delA	3070	97	3176	0.0305416	0	0	0	0	1	0	0	0	1	NO	NO	NO	NA	NA	NO	NO	NO	NO	NO	NO	NA	NA	21.4	NA	1560	67	1633	0.0410288	1510	30	1543	0.0194426	0.000408587	22	22	Artifact (8)
IT_08	2	25459853	AT	A	DNMT3A	ENST00000264709	frameshift_variant	aat/|p.Asn810fs/c.2428delA	1905	57	1966	0.0289929	0	0	0	0	1	0	0	0	1	NO	NO	NO	NA	NA	NO	NO	NO	NO	NO	NO	NA	NA	21.47	NA	947	42	990	0.0424242	958	15	976	0.0153689	0.000389946	22	22	Artifact (8)
IT_09	2	25459853	AT	A	DNMT3A	ENST00000264709	frameshift_variant	aat/|p.Asn810fs/c.2428delA	3209	106	3323	0.0318989	0	0	0	0	1	0	0	0	1	NO	NO	NO	NA	NA	NO	NO	NO	NO	NO	NO	NA	NA	21.97	NA	1637	84	1722	0.0487805	1572	22	1601	0.0137414	4.43088e-09	22	22	Artifact (8)
IT_10	2	25459853	AT	A	DNMT3A	ENST00000264709	frameshift_variant	aat/|p.Asn810fs/c.2428delA	3018	87	3111	0.0279653	0	0	0	0	1	0	0	0	1	NO	NO	NO	NA	NA	NO	NO	NO	NO	NO	NO	NA	NA	21.64	NA	1512	71	1585	0.044795	1506	16	1526	0.0104849	2.67362e-09	22	22	Artifact (8)
IT_11	2	25459853	AT	A	DNMT3A	ENST00000264709	frameshift_variant	aat/|p.Asn810fs/c.2428delA	1707	25	1740	0.0143678	0	0	0	0	1	0	0	0	1	NO	NO	NO	NA	NA	NO	NO	NO	NO	NO	NO	NA	NA	25.57	NA	843	19	866	0.02194	864	6	874	0.00686499	0.00859463	22	22	Artifact (10)
IT_12	2	25459853	AT	A	DNMT3A	ENST00000264709	frameshift_variant	aat/|p.Asn810fs/c.2428delA	3554	43	3602	0.0119378	0	0	0	0	1	0	0	0	1	NO	NO	NO	NA	NA	NO	NO	NO	NO	NO	NO	NA	NA	25.26	NA	1850	33	1886	0.0174973	1704	10	1716	0.00582751	0.00113519	22	22	Artifact (10)
IT_13	2	25459853	AT	A	DNMT3A	ENST00000264709	frameshift_variant	aat/|p.Asn810fs/c.2428delA	1446	28	1479	0.0189317	0	0	0	0	1	0	0	0	1	NO	NO	NO	NA	NA	NO	NO	NO	NO	NO	NO	NA	NA	24.12	NA	762	20	784	0.0255102	684	8	695	0.0115108	0.0562365	22	22	Artifact (10)
IT_14	2	25459853	AT	A	DNMT3A	ENST00000264709	frameshift_variant	aat/|p.Asn810fs/c.2428delA	2071	65	2144	0.0303172	0	0	0	0	1	0	0	0	1	NO	NO	NO	NA	NA	NO	NO	NO	NO	NO	NO	NA	NA	24.38	NA	1083	41	1130	0.0362832	988	24	1014	0.0236686	0.100809	22	22	Artifact (8)
IT_15	2	25459853	AT	A	DNMT3A	ENST00000264709	frameshift_variant	aat/|p.Asn810fs/c.2428delA	6056	189	6255	0.0302158	0	0	0	0	1	0	0	0	1	NO	NO	NO	NA	NA	NO	NO	NO	NO	NO	NO	NA	NA	25.15	NA	3241	167	3413	0.0489306	2815	22	2842	0.00774103	5.56503e-24	22	22	Artifact (8)
IT_16	2	25459853	AT	A	DNMT3A	ENST00000264709	frameshift_variant	aat/|p.Asn810fs/c.2428delA	3860	117	3985	0.0293601	0	0	0	0	1	0	0	0	1	NO	NO	NO	NA	NA	NO	NO	NO	NO	NO	NO	NA	NA	25.36	NA	1999	103	2107	0.0488847	1861	14	1878	0.00745474	2.69332e-16	22	22	Artifact (8)
IT_17	2	25459853	AT	A	DNMT3A	ENST00000264709	frameshift_variant	aat/|p.Asn810fs/c.2428delA	2132	205	2344	0.0874573	0	0	0	0	1	1	0	0	2	NO	NO	NO	NA	NA	NO	NO	NO	NO	NO	NO	NA	NA	20.77	NA	1003	193	1202	0.160566	1129	12	1142	0.0105079	1.18067e-44	22	22	Artifact (6)
IT_18	2	25459853	AT	A	DNMT3A	ENST00000264709	frameshift_variant	aat/|p.Asn810fs/c.2428delA	1193	126	1321	0.0953823	0	0	0	0	1	1	0	0	2	NO	NO	NO	NA	NA	NO	NO	NO	NO	NO	NO	NA	NA	21.27	NA	634	117	753	0.155378	559	9	568	0.0158451	8.38828e-21	22	22	Artifact (7)
IT_19	2	25459853	AT	A	DNMT3A	ENST00000264709	frameshift_variant	aat/|p.Asn810fs/c.2428delA	11190	262	11464	0.0228542	0	0	0	0	1	0	0	0	1	NO	NO	NO	NA	NA	NO	NO	NO	NO	NO	NO	NA	NA	24.51	NA	6385	228	6621	0.0344359	4805	34	4843	0.00702044	3.97745e-25	22	22	Artifact (8)
IT_20	2	25459853	AT	A	DNMT3A	ENST00000264709	frameshift_variant	aat/|p.Asn810fs/c.2428delA	2419	55	2474	0.0222312	0	0	0	0	1	0	0	0	1	NO	NO	NO	NA	NA	NO	NO	NO	NO	NO	NO	NA	NA	24.52	NA	1320	50	1370	0.0364964	1099	5	1104	0.00452899	9.38209e-09	22	22	Artifact (9)
IT_21	2	25459853	AT	A	DNMT3A	ENST00000264709	frameshift_variant	aat/|p.Asn810fs/c.2428delA	1839	35	1876	0.0186567	0	0	0	0	1	0	0	0	1	NO	NO	NO	NA	NA	NO	NO	NO	NO	NO	NO	NA	NA	24.62	NA	969	31	1000	0.031	870	4	876	0.00456621	1.00904e-05	22	22	Artifact (11)
IT_22	2	25459853	AT	A	DNMT3A	ENST00000264709	frameshift_variant	aat/|p.Asn810fs/c.2428delA	1999	33	2036	0.0162083	0	0	0	0	1	0	0	0	1	NO	NO	NO	NA	NA	NO	NO	NO	NO	NO	NO	NA	NA	24.77	NA	1098	25	1124	0.022242	901	8	912	0.00877193	0.020659	22	22	Artifact (10)
IT_13	2	25459863	G	GT	DNMT3A	ENST00000264709	frameshift_variant	tcc/tAcc|p.Ser807fs/c.2419_2420insA	1469	25	1470	0.0170068	0	0	0	0	1	0	0	0	1	NO	NO	NO	NA	NA	NO	NO	NO	NO	NO	NO	NA	NA	29.38	NA	771	25	772	0.0323834	698	0	698	0	1.26331e-07	2	2	Artifact (6)
IT_14	2	25459863	G	GT	DNMT3A	ENST00000264709	frameshift_variant	tcc/tAcc|p.Ser807fs/c.2419_2420insA	2138	29	2139	0.0135577	0	0	0	0	1	0	0	0	1	NO	NO	NO	NA	NA	NO	NO	NO	NO	NO	NO	NA	NA	29.23	NA	1121	29	1121	0.0258698	1017	0	1018	0	1.71722e-08	2	2	Artifact (6)
IT_14	2	25459868	C	CA	DNMT3A	ENST00000264709	frameshift_variant	ccg/ccgT|p.Leu805fs/c.2412_2413insT	2124	23	2128	0.0108083	0	0	0	0	1	0	0	0	1	NO	NO	NO	NA	NA	NO	NO	NO	NO	NO	NO	NA	NA	22.37	NA	1105	8	1108	0.00722022	1019	15	1020	0.0147059	0.14054	6	6	Artifact (7)
IT_17	2	25459868	C	CA	DNMT3A	ENST00000264709	frameshift_variant	ccg/ccgT|p.Leu805fs/c.2412_2413insT	2324	30	2325	0.0129032	0	0	0	0	1	0	0	0	1	NO	NO	NO	NA	NA	NO	NO	NO	NO	NO	NO	NA	NA	20.4	NA	1174	11	1174	0.00936968	1150	19	1151	0.0165074	0.144593	6	6	Artifact (7)
IT_19	2	25459868	C	CA	DNMT3A	ENST00000264709	frameshift_variant	ccg/ccgT|p.Leu805fs/c.2412_2413insT	11414	130	11423	0.0113805	0	0	0	0	1	0	0	0	1	NO	NO	NO	NA	NA	NO	NO	NO	NO	NO	NO	NA	NA	21.85	NA	6551	18	6557	0.00274516	4863	112	4866	0.0230169	2.18622e-24	6	6	Artifact (7)
IT_20	2	25459868	C	CA	DNMT3A	ENST00000264709	frameshift_variant	ccg/ccgT|p.Leu805fs/c.2412_2413insT	2461	40	2462	0.016247	0	0	0	0	1	0	0	0	1	NO	NO	NO	NA	NA	NO	NO	NO	NO	NO	NO	NA	NA	21.98	NA	1354	5	1355	0.00369004	1107	35	1107	0.031617	4.61651e-08	6	6	Artifact (8)
IT_21	2	25459868	C	CA	DNMT3A	ENST00000264709	frameshift_variant	ccg/ccgT|p.Leu805fs/c.2412_2413insT	1867	39	1873	0.0208222	0	0	0	0	1	0	0	0	1	NO	NO	NO	NA	NA	NO	NO	NO	NO	NO	NO	NA	NA	21.72	NA	990	6	992	0.00604839	877	33	881	0.0374574	2.13581e-06	6	6	Artifact (6)
IT_22	2	25459868	C	CA	DNMT3A	ENST00000264709	frameshift_variant	ccg/ccgT|p.Leu805fs/c.2412_2413insT	2032	40	2032	0.019685	0	0	0	0	1	0	0	0	1	NO	NO	NO	NA	NA	NO	NO	NO	NO	NO	NO	NA	NA	21.23	NA	1118	9	1118	0.00805009	914	31	914	0.0339168	4.11118e-05	6	6	Artifact (8)
IT_23	2	25459871	CG	C	DNMT3A	ENST00000264709	frameshift_variant	ccg/|p.Pro804fs/c.2410delC	4298	128	4433	0.0288744	0	0	0	0	1	0	0	0	1	NO	NO	NO	NA	NA	NO	NO	NO	NO	NO	NO	NA	NA	21.41	NA	2067	126	2194	0.0574294	2231	2	2239	0.000893256	1.48452e-36	20	20	Artifact (9)
IT_24	2	25459871	CG	C	DNMT3A	ENST00000264709	frameshift_variant	ccg/|p.Pro804fs/c.2411delC	2158	152	2317	0.0656021	0	1	0	0	1	1	0	0	3	NO	NO	NO	NA	NA	NO	NO	NO	NO	NO	NO	NA	NA	20.22	NA	886	152	1043	0.145733	1272	0	1274	0	2.21568e-56	20	20	Artifact (7)
IT_02	2	25459871	CG	C	DNMT3A	ENST00000264709	frameshift_variant	ccg/|p.Pro804fs/c.2410delC	1374	53	1429	0.0370889	0	0	0	0	1	0	0	0	1	NO	NO	NO	NA	NA	NO	NO	NO	NO	NO	NO	NA	NA	21.46	NA	672	52	724	0.0718232	702	1	705	0.00141844	6.21498e-15	20	20	Artifact (9)
IT_04	2	25459871	CG	C	DNMT3A	ENST00000264709	frameshift_variant	ccg/|p.Pro804fs/c.2410delC	672	29	701	0.0413695	0	0	0	0	1	0	0	0	1	NO	NO	NO	NA	NA	NO	NO	NO	NO	NO	NO	NA	NA	21.52	NA	346	29	375	0.0773333	326	0	326	0	1.20824e-08	20	20	Artifact (9)
IT_07	2	25459871	CG	C	DNMT3A	ENST00000264709	frameshift_variant	ccg/|p.Pro804fs/c.2410delC	3059	101	3168	0.0318813	0	0	0	0	1	0	0	0	1	NO	NO	NO	NA	NA	NO	NO	NO	NO	NO	NO	NA	NA	20.81	NA	1509	101	1612	0.0626551	1550	0	1556	0	5.48566e-31	20	20	Artifact (9)
IT_08	2	25459871	CG	C	DNMT3A	ENST00000264709	frameshift_variant	ccg/|p.Pro804fs/c.2410delC	1901	55	1963	0.0280183	0	0	0	0	1	0	0	0	1	NO	NO	NO	NA	NA	NO	NO	NO	NO	NO	NO	NA	NA	20.86	NA	921	55	976	0.0563525	980	0	987	0	1.13197e-17	20	20	Artifact (9)
IT_09	2	25459871	CG	C	DNMT3A	ENST00000264709	frameshift_variant	ccg/|p.Pro804fs/c.2410delC	3181	120	3311	0.0362428	0	0	0	0	1	0	0	0	1	NO	NO	NO	NA	NA	NO	NO	NO	NO	NO	NO	NA	NA	20.88	NA	1572	120	1694	0.0708383	1609	0	1617	0	2.21241e-36	20	20	Artifact (9)
IT_10	2	25459871	CG	C	DNMT3A	ENST00000264709	frameshift_variant	ccg/|p.Pro804fs/c.2410delC	2959	129	3092	0.0417206	0	0	0	0	1	1	0	0	2	NO	NO	NO	NA	NA	NO	NO	NO	NO	NO	NO	NA	NA	20.73	NA	1425	129	1557	0.0828516	1534	0	1535	0	2.52736e-40	20	20	Artifact (8)
IT_13	2	25459871	CG	C	DNMT3A	ENST00000264709	frameshift_variant	ccg/|p.Pro804fs/c.2410delC	1403	66	1472	0.044837	0	0	0	0	1	1	0	0	2	NO	NO	NO	NA	NA	NO	NO	NO	NO	NO	NO	NA	NA	21.63	NA	703	65	768	0.0846354	700	1	704	0.00142045	4.63815e-18	20	20	Artifact (8)
IT_14	2	25459871	CG	C	DNMT3A	ENST00000264709	frameshift_variant	ccg/|p.Pro804fs/c.2410delC	2048	81	2132	0.0379925	0	0	0	0	1	0	0	0	1	NO	NO	NO	NA	NA	NO	NO	NO	NO	NO	NO	NA	NA	21.21	NA	1026	81	1107	0.0731707	1022	0	1025	0	2.55503e-24	20	20	Artifact (9)
IT_15	2	25459871	CG	C	DNMT3A	ENST00000264709	frameshift_variant	ccg/|p.Pro804fs/c.2410delC	5838	323	6174	0.0523162	0	0	0	0	1	1	0	0	2	NO	NO	NO	NA	NA	NO	NO	NO	NO	NO	NO	NA	NA	21.68	NA	2970	320	3296	0.0970874	2868	3	2878	0.00104239	2.26438e-85	20	20	Artifact (7)
IT_16	2	25459871	CG	C	DNMT3A	ENST00000264709	frameshift_variant	ccg/|p.Pro804fs/c.2410delC	3796	152	3960	0.0383838	0	0	0	0	1	1	0	0	2	NO	NO	NO	NA	NA	NO	NO	NO	NO	NO	NO	NA	NA	21.87	NA	1896	151	2053	0.0735509	1900	1	1907	0.000524384	4.26021e-43	20	20	Artifact (8)
IT_05	2	25459871	CG	C	DNMT3A	ENST00000264709	frameshift_variant	ccg/|p.Pro804fs/c.2410delC	5007	78	5094	0.0153121	0	0	0	0	1	0	0	0	1	NO	NO	NO	NA	NA	NO	NO	NO	NO	NO	NO	NA	NA	22.49	NA	2620	78	2700	0.0288889	2387	0	2394	0	2.50816e-22	20	20	Artifact (11)
IT_06	2	25459871	CG	C	DNMT3A	ENST00000264709	frameshift_variant	ccg/|p.Pro804fs/c.2410delC	3741	80	3825	0.020915	0	0	0	0	1	0	0	0	1	NO	NO	NO	NA	NA	NO	NO	NO	NO	NO	NO	NA	NA	22.51	NA	1947	80	2030	0.0394089	1794	0	1795	0	5.39852e-23	20	20	Artifact (9)
IT_17	2	25459871	CG	C	DNMT3A	ENST00000264709	frameshift_variant	ccg/|p.Pro804fs/c.2410delC	2139	178	2329	0.0764277	0	0	0	0	1	1	0	0	2	NO	NO	NO	NA	NA	NO	NO	NO	NO	NO	NO	NA	NA	20.61	NA	991	178	1172	0.151877	1148	0	1157	0	9.65668e-57	20	20	Artifact (7)
IT_18	2	25459871	CG	C	DNMT3A	ENST00000264709	frameshift_variant	ccg/|p.Pro804fs/c.2410delC	1200	99	1306	0.075804	0	0	0	0	1	1	0	0	2	NO	NO	NO	NA	NA	NO	NO	NO	NO	NO	NO	NA	NA	21.1	NA	632	99	733	0.135061	568	0	573	0	1.2954e-26	20	20	Artifact (7)
IT_19	2	25459871	CG	C	DNMT3A	ENST00000264709	frameshift_variant	ccg/|p.Pro804fs/c.2410delC	11222	148	11427	0.0129518	0	0	0	0	1	0	0	0	1	NO	NO	NO	NA	NA	NO	NO	NO	NO	NO	NO	NA	NA	23.08	NA	6395	148	6552	0.0225885	4827	0	4875	0	1.68079e-36	20	20	Artifact (11)
IT_21	2	25459871	CG	C	DNMT3A	ENST00000264709	frameshift_variant	ccg/|p.Pro804fs/c.2410delC	1836	34	1872	0.0181624	0	0	0	0	1	0	0	0	1	NO	NO	NO	NA	NA	NO	NO	NO	NO	NO	NO	NA	NA	22.64	NA	956	33	990	0.0333333	880	1	882	0.00113379	1.40562e-08	20	20	Artifact (11)
IT_22	2	25459871	CG	C	DNMT3A	ENST00000264709	frameshift_variant	ccg/|p.Pro804fs/c.2410delC	1961	69	2032	0.0339567	0	0	0	0	1	0	0	0	1	NO	NO	NO	NA	NA	NO	NO	NO	NO	NO	NO	NA	NA	22.29	NA	1048	69	1117	0.0617726	913	0	915	0	5.05416e-19	20	20	Artifact (9)
IT_23	2	25459873	GC	G	DNMT3A	ENST00000264709	frameshift_variant	agg/|p.Arg803fs/c.2409delG	3396	1014	4425	0.229153	1	1	0	0	0	1	0	0	3	NO	NO	NO	NA	NA	rs35824014	rs35824014	NO	NO	NO	NO	NA	NA	18.24	NA	2184	0	2187	0	1212	1014	2238	0.453083	0	22	22	Artifact (5)
IT_24	2	25459873	GC	G	DNMT3A	ENST00000264709	frameshift_variant	agg/|p.Arg803fs/c.2409delG	2122	186	2315	0.0803456	0	0	0	0	0	1	0	0	1	NO	NO	NO	NA	NA	rs35824014	rs35824014	NO	NO	NO	NO	NA	NA	17.01	NA	1032	0	1036	0	1090	186	1279	0.145426	2.19823e-51	22	22	Artifact (6)
IT_02	2	25459873	GC	G	DNMT3A	ENST00000264709	frameshift_variant	agg/|p.Arg803fs/c.2409delG	1366	61	1432	0.0425978	0	0	0	0	0	1	0	0	1	NO	NO	NO	NA	NA	rs35824014	rs35824014	NO	NO	NO	NO	NA	NA	18.28	NA	724	0	724	0	642	61	708	0.0861582	4.41541e-20	22	22	Artifact (7)
IT_04	2	25459873	GC	G	DNMT3A	ENST00000264709	frameshift_variant	agg/|p.Arg803fs/c.2409delG	664	34	700	0.0485714	0	0	0	0	0	1	0	0	1	NO	NO	NO	NA	NA	rs35824014	rs35824014	NO	NO	NO	NO	NA	NA	17.59	NA	371	0	373	0	293	34	327	0.103976	2.43449e-12	22	22	Artifact (7)
IT_07	2	25459873	GC	G	DNMT3A	ENST00000264709	frameshift_variant	agg/|p.Arg803fs/c.2409delG	2643	518	3171	0.163355	1	1	0	0	0	1	0	0	3	NO	NO	NO	NA	NA	rs35824014	rs35824014	NO	NO	NO	NO	NA	NA	17.85	NA	1607	1	1609	0.000621504	1036	517	1562	0.330986	1.09299e-180	22	22	Artifact (5)
IT_08	2	25459873	GC	G	DNMT3A	ENST00000264709	frameshift_variant	agg/|p.Arg803fs/c.2409delG	1666	291	1970	0.147716	0	1	0	0	0	1	0	0	2	NO	NO	NO	NA	NA	rs35824014	rs35824014	NO	NO	NO	NO	NA	NA	17.54	NA	975	0	976	0	691	291	994	0.292757	8.28107e-99	22	22	Artifact (5)
IT_09	2	25459873	GC	G	DNMT3A	ENST00000264709	frameshift_variant	agg/|p.Arg803fs/c.2409delG	2963	345	3315	0.104072	0	1	0	0	0	1	0	0	2	NO	NO	NO	NA	NA	rs35824014	rs35824014	NO	NO	NO	NO	NA	NA	17.53	NA	1689	0	1690	0	1274	345	1625	0.212308	6.77829e-117	22	22	Artifact (5)
IT_10	2	25459873	GC	G	DNMT3A	ENST00000264709	frameshift_variant	agg/|p.Arg803fs/c.2409delG	2687	405	3098	0.13073	0	1	0	0	0	1	0	0	2	NO	NO	NO	NA	NA	rs35824014	rs35824014	NO	NO	NO	NO	NA	NA	17.42	NA	1554	1	1556	0.000642674	1133	404	1542	0.261997	3.31647e-134	22	22	Artifact (5)
IT_11	2	25459873	GC	G	DNMT3A	ENST00000264709	frameshift_variant	agg/|p.Arg803fs/c.2409delG	1594	145	1742	0.0832377	0	1	0	0	0	1	0	0	2	NO	NO	NO	NA	NA	rs35824014	rs35824014	NO	NO	NO	NO	NA	NA	20.71	NA	863	0	864	0	731	145	878	0.165148	1.13392e-46	22	22	Artifact (5)
IT_12	2	25459873	GC	G	DNMT3A	ENST00000264709	frameshift_variant	agg/|p.Arg803fs/c.2409delG	3225	366	3598	0.101723	0	1	0	0	0	1	0	0	2	NO	NO	NO	NA	NA	rs35824014	rs35824014	NO	NO	NO	NO	NA	NA	20.49	NA	1868	0	1869	0	1357	366	1729	0.211683	2.93095e-127	22	22	Artifact (5)
IT_13	2	25459873	GC	G	DNMT3A	ENST00000264709	frameshift_variant	agg/|p.Arg803fs/c.2409delG	1287	176	1469	0.119809	0	1	0	0	0	1	0	0	2	NO	NO	NO	NA	NA	rs35824014	rs35824014	NO	NO	NO	NO	NA	NA	18.59	NA	767	0	768	0	520	176	701	0.25107	2.78541e-63	22	22	Artifact (5)
IT_14	2	25459873	GC	G	DNMT3A	ENST00000264709	frameshift_variant	agg/|p.Arg803fs/c.2409delG	1868	255	2129	0.119775	0	1	0	0	0	1	0	0	2	NO	NO	NO	NA	NA	rs35824014	rs35824014	NO	NO	NO	NO	NA	NA	18.48	NA	1105	0	1107	0	763	255	1022	0.249511	2.36042e-90	22	22	Artifact (5)
IT_15	2	25459873	GC	G	DNMT3A	ENST00000264709	frameshift_variant	agg/|p.Arg803fs/c.2409delG	5601	558	6167	0.0904816	0	1	0	0	0	1	0	0	2	NO	NO	NO	NA	NA	rs35824014	rs35824014	NO	NO	NO	NO	NA	NA	19.35	NA	3278	1	3281	0.000304785	2323	557	2886	0.193001	7.64617e-196	22	22	Artifact (5)
IT_16	2	25459873	GC	G	DNMT3A	ENST00000264709	frameshift_variant	agg/|p.Arg803fs/c.2409delG	3636	313	3957	0.0791003	0	1	0	0	0	1	0	0	2	NO	NO	NO	NA	NA	rs35824014	rs35824014	NO	NO	NO	NO	NA	NA	19.58	NA	2049	1	2051	0.000487567	1587	312	1906	0.163694	5.85797e-104	22	22	Artifact (5)
IT_05	2	25459873	GC	G	DNMT3A	ENST00000264709	frameshift_variant	agg/|p.Arg803fs/c.2409delG	4880	207	5096	0.0406201	0	0	0	0	0	1	0	0	1	NO	NO	NO	NA	NA	rs35824014	rs35824014	NO	NO	NO	NO	NA	NA	19.31	NA	2697	0	2698	0	2183	207	2398	0.0863219	8.81455e-71	22	22	Artifact (7)
IT_06	2	25459873	GC	G	DNMT3A	ENST00000264709	frameshift_variant	agg/|p.Arg803fs/c.2409delG	3669	146	3817	0.0382499	0	0	0	0	0	1	0	0	1	NO	NO	NO	NA	NA	rs35824014	rs35824014	NO	NO	NO	NO	NA	NA	18.64	NA	2023	0	2023	0	1646	146	1794	0.0813824	4.69958e-50	22	22	Artifact (7)
IT_17	2	25459873	GC	G	DNMT3A	ENST00000264709	frameshift_variant	agg/|p.Arg803fs/c.2409delG	1833	487	2332	0.208834	1	1	0	0	0	1	0	0	3	NO	NO	NO	NA	NA	rs35824014	rs35824014	NO	NO	NO	NO	NA	NA	18.03	NA	1170	0	1171	0	663	487	1161	0.419466	4.48881e-178	22	22	Artifact (5)
IT_18	2	25459873	GC	G	DNMT3A	ENST00000264709	frameshift_variant	agg/|p.Arg803fs/c.2409delG	1036	264	1308	0.201835	1	1	0	0	0	1	0	0	3	NO	NO	NO	NA	NA	rs35824014	rs35824014	NO	NO	NO	NO	NA	NA	18.9	NA	730	0	730	0	306	264	578	0.456747	1.23026e-114	22	22	Artifact (5)
IT_19	2	25459873	GC	G	DNMT3A	ENST00000264709	frameshift_variant	agg/|p.Arg803fs/c.2409delG	10518	849	11420	0.0743433	0	1	0	0	0	1	0	0	2	NO	NO	NO	NA	NA	rs35824014	rs35824014	NO	NO	NO	NO	NA	NA	20.25	NA	6543	0	6543	0	3975	849	4877	0.174082	0	22	22	Artifact (5)
IT_20	2	25459873	GC	G	DNMT3A	ENST00000264709	frameshift_variant	agg/|p.Arg803fs/c.2409delG	2269	184	2461	0.0747664	0	1	0	0	0	1	0	0	2	NO	NO	NO	NA	NA	rs35824014	rs35824014	NO	NO	NO	NO	NA	NA	20	NA	1351	0	1351	0	918	184	1110	0.165766	1.19579e-68	22	22	Artifact (5)
IT_21	2	25459873	GC	G	DNMT3A	ENST00000264709	frameshift_variant	agg/|p.Arg803fs/c.2409delG	1754	116	1872	0.0619658	0	1	0	0	0	1	0	0	2	NO	NO	NO	NA	NA	rs35824014	rs35824014	NO	NO	NO	NO	NA	NA	19.24	NA	990	0	990	0	764	116	882	0.131519	1.45313e-40	22	22	Artifact (5)
IT_22	2	25459873	GC	G	DNMT3A	ENST00000264709	frameshift_variant	agg/|p.Arg803fs/c.2409delG	1909	116	2033	0.0570585	0	1	0	0	0	1	0	0	2	NO	NO	NO	NA	NA	rs35824014	rs35824014	NO	NO	NO	NO	NA	NA	19.13	NA	1112	1	1115	0.000896861	797	115	918	0.125272	1.46292e-40	22	22	Artifact (5)
IT_01	2	25462003	T	TC	DNMT3A	ENST00000264709	frameshift_variant	atg/atGg|p.Asn802fs/c.2402_2403insG	2449	26	2453	0.0105993	0	0	0	0	1	0	0	0	1	NO	NO	NO	NO	O	NO	NO	NO	NO	NO	NO	NA	NA	26.44	NA	1280	0	1283	0	1169	26	1170	0.0222222	5.21042e-09	7	7	Artifact (8)
IT_10	2	25462003	T	TC	DNMT3A	ENST00000264709	frameshift_variant	atg/atGg|p.Asn802fs/c.2402_2403insG	3046	32	3050	0.0104918	0	0	0	0	1	0	0	0	1	NO	NO	NO	NO	O	NO	NO	NO	NO	NO	NO	NA	NA	26.57	NA	1546	2	1547	0.00129282	1500	30	1503	0.0199601	9.99856e-08	7	7	Artifact (8)
IT_14	2	25462003	T	TC	DNMT3A	ENST00000264709	frameshift_variant	atg/atGg|p.Asn802fs/c.2402_2403insG	1740	25	1746	0.0143184	0	0	0	0	1	0	0	0	1	NO	NO	NO	NO	O	NO	NO	NO	NO	NO	NO	NA	NA	27.7	NA	975	0	980	0	765	25	766	0.0326371	1.51205e-09	7	7	Artifact (8)
IT_15	2	25462003	T	TC	DNMT3A	ENST00000264709	frameshift_variant	atg/atGg|p.Asn802fs/c.2402_2403insG	1480	27	1485	0.0181818	0	0	0	0	1	0	0	0	1	NO	NO	NO	NO	O	NO	NO	NO	NO	NO	NO	NA	NA	26.74	NA	809	0	812	0	671	27	673	0.0401189	7.17101e-10	7	7	Artifact (8)
IT_17	2	25462003	T	TC	DNMT3A	ENST00000264709	frameshift_variant	atg/atGg|p.Asn802fs/c.2402_2403insG	1742	51	1744	0.0292431	0	0	0	0	1	0	0	0	1	NO	NO	NO	NO	O	NO	NO	NO	NO	NO	NO	NA	NA	26.59	NA	957	0	957	0	785	51	787	0.064803	5.43985e-18	7	7	Artifact (6)
IT_18	2	25462003	T	TC	DNMT3A	ENST00000264709	frameshift_variant	atg/atGg|p.Asn802fs/c.2402_2403insG	3123	53	3128	0.0169437	0	0	0	0	1	0	0	0	1	NO	NO	NO	NO	O	NO	NO	NO	NO	NO	NO	NA	NA	27.38	NA	1689	0	1691	0	1434	53	1437	0.0368824	2.06544e-18	7	7	Artifact (8)
IT_09	2	25462007	A	AC	DNMT3A	ENST00000264709	frameshift_variant	ccc/cccG|p.Met801fs/c.2397_2398insG	2888	32	2892	0.011065	0	0	0	0	1	0	0	0	1	NO	NO	NO	NO	O	NO	NO	NO	NO	NO	NO	NA	NA	28.72	NA	1438	18	1441	0.0124913	1450	14	1451	0.00964852	0.483337	4	4	Artifact (7)
IT_05	2	25462007	A	AC	DNMT3A	ENST00000264709	frameshift_variant	ccc/cccG|p.Met801fs/c.2397_2398insG	3538	41	3538	0.0115885	0	0	0	0	1	0	0	0	1	NO	NO	NO	NO	O	NO	NO	NO	NO	NO	NO	NA	NA	28.13	NA	1890	34	1890	0.0179894	1648	7	1648	0.00424757	0.00011201	4	4	Artifact (8)
IT_18	2	25462007	A	AC	DNMT3A	ENST00000264709	frameshift_variant	ccc/cccG|p.Met801fs/c.2397_2398insG	3130	33	3135	0.0105263	0	0	0	0	1	0	0	0	1	NO	NO	NO	NO	O	NO	NO	NO	NO	NO	NO	NA	NA	28.39	NA	1684	22	1687	0.0130409	1446	11	1448	0.00759669	0.161746	4	4	Artifact (7)
IT_23	2	25462016	GT	G	DNMT3A	ENST00000264709	frameshift_variant	aac/|p.Asn797fs/c.2389delA	3169	101	3280	0.0307927	0	0	0	0	1	0	0	0	1	NO	NO	NO	NA	NA	NO	NO	NO	8.236e-06	NO	NO	NA	NA	23.21	NA	1617	0	1620	0	1552	101	1660	0.0608434	2.7611e-31	24	24	Artifact (7)
IT_01	2	25462016	GT	G	DNMT3A	ENST00000264709	frameshift_variant	aac/|p.Asn797fs/c.2389delA	2323	146	2476	0.0589661	0	0	0	0	1	1	0	0	2	NO	NO	NO	NA	NA	NO	NO	NO	8.236e-06	NO	NO	NA	NA	23.08	NA	1278	0	1281	0	1045	146	1195	0.122176	4.43901e-49	24	24	Artifact (5)
IT_02	2	25462016	GT	G	DNMT3A	ENST00000264709	frameshift_variant	aac/|p.Asn797fs/c.2389delA	602	31	634	0.0488959	0	0	0	0	1	0	0	0	1	NO	NO	NO	NA	NA	NO	NO	NO	8.236e-06	NO	NO	NA	NA	23.04	NA	314	0	314	0	288	31	320	0.096875	4.4415e-10	24	24	Artifact (7)
IT_03	2	25462016	GT	G	DNMT3A	ENST00000264709	frameshift_variant	aac/|p.Asn797fs/c.2389delA	621	31	656	0.0472561	0	0	0	0	1	0	0	0	1	NO	NO	NO	NA	NA	NO	NO	NO	8.236e-06	NO	NO	NA	NA	22.76	NA	322	1	325	0.00307692	299	30	331	0.0906344	1.60733e-08	24	24	Artifact (7)
IT_04	2	25462016	GT	G	DNMT3A	ENST00000264709	frameshift_variant	aac/|p.Asn797fs/c.2389delA	680	46	730	0.0630137	0	0	0	0	1	1	0	0	2	NO	NO	NO	NA	NA	NO	NO	NO	8.236e-06	NO	NO	NA	NA	23.9	NA	387	0	388	0	293	46	342	0.134503	1.06905e-16	24	24	Artifact (5)
IT_07	2	25462016	GT	G	DNMT3A	ENST00000264709	frameshift_variant	aac/|p.Asn797fs/c.2390delA	1702	165	1876	0.0879531	0	1	0	0	1	1	0	0	3	NO	NO	NO	NA	NA	NO	NO	NO	8.236e-06	NO	NO	NA	NA	23.04	NA	957	0	958	0	745	165	918	0.179739	7.26623e-56	24	24	Artifact (5)
IT_08	2	25462016	GT	G	DNMT3A	ENST00000264709	frameshift_variant	aac/|p.Asn797fs/c.2389delA	1395	112	1513	0.0740251	0	0	0	0	1	1	0	0	2	NO	NO	NO	NA	NA	NO	NO	NO	8.236e-06	NO	NO	NA	NA	23.02	NA	762	0	764	0	633	112	749	0.149533	5.63408e-37	24	24	Artifact (5)
IT_09	2	25462016	GT	G	DNMT3A	ENST00000264709	frameshift_variant	aac/|p.Asn797fs/c.2389delA	2714	192	2912	0.0659341	0	0	0	0	1	1	0	0	2	NO	NO	NO	NA	NA	NO	NO	NO	8.236e-06	NO	NO	NA	NA	22.79	NA	1438	1	1439	0.000694927	1276	191	1473	0.129667	2.94561e-58	24	24	Artifact (5)
IT_10	2	25462016	GT	G	DNMT3A	ENST00000264709	frameshift_variant	aac/|p.Asn797fs/c.2389delA	2825	239	3074	0.0777489	0	0	0	0	1	1	0	0	2	NO	NO	NO	NA	NA	NO	NO	NO	8.236e-06	NO	NO	NA	NA	23.03	NA	1540	0	1542	0	1285	239	1532	0.156005	1.21994e-77	24	24	Artifact (5)
IT_11	2	25462016	GT	G	DNMT3A	ENST00000264709	frameshift_variant	aac/|p.Asn797fs/c.2389delA	3982	190	4183	0.0454219	0	0	0	0	1	1	0	0	2	NO	NO	NO	NA	NA	NO	NO	NO	8.236e-06	NO	NO	NA	NA	24.72	NA	2095	0	2098	0	1887	190	2085	0.0911271	2.96155e-60	24	24	Artifact (6)
IT_12	2	25462016	GT	G	DNMT3A	ENST00000264709	frameshift_variant	aac/|p.Asn797fs/c.2389delA	4634	235	4880	0.0481557	0	0	0	0	1	1	0	0	2	NO	NO	NO	NA	NA	NO	NO	NO	8.236e-06	NO	NO	NA	NA	24.56	NA	2476	1	2483	0.000402739	2158	234	2397	0.097622	1.66805e-73	24	24	Artifact (6)
IT_13	2	25462016	GT	G	DNMT3A	ENST00000264709	frameshift_variant	aac/|p.Asn797fs/c.2389delA	2294	80	2381	0.0335993	0	0	0	0	1	0	0	0	1	NO	NO	NO	NA	NA	NO	NO	NO	8.236e-06	NO	NO	NA	NA	24.2	NA	1258	0	1262	0	1036	80	1119	0.0714924	1.25694e-27	24	24	Artifact (7)
IT_14	2	25462016	GT	G	DNMT3A	ENST00000264709	frameshift_variant	aac/|p.Asn797fs/c.2389delA	1659	84	1753	0.0479179	0	0	0	0	1	0	0	0	1	NO	NO	NO	NA	NA	NO	NO	NO	8.236e-06	NO	NO	NA	NA	24.56	NA	968	0	969	0	691	84	784	0.107143	1.93856e-31	24	24	Artifact (7)
IT_15	2	25462016	GT	G	DNMT3A	ENST00000264709	frameshift_variant	aac/|p.Asn797fs/c.2389delA	1444	59	1504	0.0392287	0	0	0	0	1	0	0	0	1	NO	NO	NO	NA	NA	NO	NO	NO	8.236e-06	NO	NO	NA	NA	25.06	NA	805	0	805	0	639	59	699	0.0844063	5.65189e-21	24	24	Artifact (7)
IT_05	2	25462016	GT	G	DNMT3A	ENST00000264709	frameshift_variant	aac/|p.Asn797fs/c.2389delA	3409	129	3549	0.0363483	0	0	0	0	1	0	0	0	1	NO	NO	NO	NA	NA	NO	NO	NO	8.236e-06	NO	NO	NA	NA	22.98	NA	1884	1	1886	0.000530223	1525	128	1663	0.0769693	2.35023e-42	24	24	Artifact (7)
IT_06	2	25462016	GT	G	DNMT3A	ENST00000264709	frameshift_variant	aac/|p.Asn797fs/c.2389delA	3850	141	4007	0.0351884	0	0	0	0	1	0	0	0	1	NO	NO	NO	NA	NA	NO	NO	NO	8.236e-06	NO	NO	NA	NA	22.57	NA	2075	0	2078	0	1775	141	1929	0.0730949	7.21311e-47	24	24	Artifact (7)
IT_17	2	25462016	GT	G	DNMT3A	ENST00000264709	frameshift_variant	aac/|p.Asn797fs/c.2390delA	1466	281	1764	0.159297	1	0	0	0	1	1	0	0	3	NO	NO	NO	NA	NA	NO	NO	NO	8.236e-06	NO	NO	NA	NA	25.19	NA	952	0	953	0	514	281	811	0.346486	4.78764e-111	24	24	Artifact (5)
IT_18	2	25462016	GT	G	DNMT3A	ENST00000264709	frameshift_variant	aac/|p.Asn797fs/c.2389delA	2776	353	3148	0.112135	0	0	0	0	1	1	0	0	2	NO	NO	NO	NA	NA	NO	NO	NO	8.236e-06	NO	NO	NA	NA	24.58	NA	1675	0	1676	0	1101	353	1472	0.23981	1.59815e-129	24	24	Artifact (5)
IT_19	2	25462016	GT	G	DNMT3A	ENST00000264709	frameshift_variant	aac/|p.Asn797fs/c.2389delA	9032	745	9812	0.0759274	0	0	0	0	1	1	0	0	2	NO	NO	NO	NA	NA	NO	NO	NO	8.236e-06	NO	NO	NA	NA	26.91	NA	5956	1	5959	0.000167813	3076	744	3853	0.193096	0	24	24	Artifact (5)
IT_20	2	25462016	GT	G	DNMT3A	ENST00000264709	frameshift_variant	aac/|p.Asn797fs/c.2389delA	1479	155	1638	0.0946276	0	0	0	0	1	1	0	0	2	NO	NO	NO	NA	NA	NO	NO	NO	8.236e-06	NO	NO	NA	NA	25.74	NA	896	0	896	0	583	155	742	0.208895	1.58287e-58	24	24	Artifact (5)
IT_21	2	25462016	GT	G	DNMT3A	ENST00000264709	frameshift_variant	aac/|p.Asn797fs/c.2390delA	569	87	657	0.13242	1	1	0	0	1	1	0	0	4	NO	NO	NO	NA	NA	NO	NO	NO	8.236e-06	NO	NO	NA	NA	25.07	NA	350	0	350	0	219	87	307	0.283388	7.67645e-33	24	24	Artifact (4)
IT_22	2	25462016	GT	G	DNMT3A	ENST00000264709	frameshift_variant	aac/|p.Asn797fs/c.2390delA	3711	466	4195	0.111085	0	1	0	0	1	1	0	0	3	NO	NO	NO	NA	NA	NO	NO	NO	8.236e-06	NO	NO	NA	NA	25.91	NA	2343	0	2344	0	1368	466	1851	0.251756	9.47491e-184	24	24	Artifact (5)
IT_24	2	25462019	A	AC	DNMT3A	ENST00000264709	frameshift_variant	tgg/tggG|p.Asn797fs/c.2385dupG	662	59	664	0.0888554	0	0	0	0	1	1	0	0	2	NO	NO	NO	NO	O	NO	NO	NO	NO	NO	NO	NA	NA	23.8	NA	328	55	330	0.166667	334	4	334	0.011976	4.10122e-12	14	14	Artifact (7)
IT_01	2	25462019	A	AC	DNMT3A	ENST00000264709	frameshift_variant	tgg/tggG|p.Asn797fs/c.2385dupG	2470	39	2476	0.0157512	0	0	0	0	1	0	0	0	1	NO	NO	NO	NO	O	NO	NO	NO	NO	NO	NO	NA	NA	24.57	NA	1278	3	1279	0.00234558	1192	36	1197	0.0300752	9.43182e-09	14	14	Artifact (11)
IT_10	2	25462019	A	AC	DNMT3A	ENST00000264709	frameshift_variant	tgg/tggG|p.Asn797fs/c.2385dupG	3068	37	3075	0.0120325	0	0	0	0	1	0	0	0	1	NO	NO	NO	NO	O	NO	NO	NO	NO	NO	NO	NA	NA	23.44	NA	1538	18	1540	0.0116883	1530	19	1535	0.0123779	0.87038	14	14	Artifact (10)
IT_11	2	25462019	A	AC	DNMT3A	ENST00000264709	frameshift_variant	tgg/tggG|p.Asn797fs/c.2385dupG	4172	59	4182	0.0141081	0	0	0	0	1	0	0	0	1	NO	NO	NO	NO	O	NO	NO	NO	NO	NO	NO	NA	NA	26.02	NA	2095	42	2098	0.0200191	2077	17	2084	0.00815739	0.0014831	14	14	Artifact (10)
IT_12	2	25462019	A	AC	DNMT3A	ENST00000264709	frameshift_variant	tgg/tggG|p.Asn797fs/c.2385dupG	4877	67	4882	0.0137239	0	0	0	0	1	0	0	0	1	NO	NO	NO	NO	O	NO	NO	NO	NO	NO	NO	NA	NA	26.03	NA	2477	47	2481	0.018944	2400	20	2401	0.00832986	0.00189818	14	14	Artifact (10)
IT_13	2	25462019	A	AC	DNMT3A	ENST00000264709	frameshift_variant	tgg/tggG|p.Asn797fs/c.2385dupG	2376	32	2381	0.0134397	0	0	0	0	1	0	0	0	1	NO	NO	NO	NO	O	NO	NO	NO	NO	NO	NO	NA	NA	25.99	NA	1260	16	1261	0.0126883	1116	16	1120	0.0142857	0.858858	14	14	Artifact (10)
IT_15	2	25462019	A	AC	DNMT3A	ENST00000264709	frameshift_variant	tgg/tggG|p.Asn797fs/c.2385dupG	1510	30	1512	0.0198413	0	0	0	0	1	0	0	0	1	NO	NO	NO	NO	O	NO	NO	NO	NO	NO	NO	NA	NA	26.38	NA	803	15	805	0.0186335	707	15	707	0.0212164	0.853833	14	14	Artifact (10)
IT_05	2	25462019	A	AC	DNMT3A	ENST00000264709	frameshift_variant	tgg/tggG|p.Asn797fs/c.2385dupG	3544	37	3550	0.0104225	0	0	0	0	1	0	0	0	1	NO	NO	NO	NO	O	NO	NO	NO	NO	NO	NO	NA	NA	24.16	NA	1883	20	1884	0.0106157	1661	17	1666	0.0102041	1	14	14	Artifact (10)
IT_06	2	25462019	A	AC	DNMT3A	ENST00000264709	frameshift_variant	tgg/tggG|p.Asn797fs/c.2385dupG	4006	51	4009	0.0127214	0	0	0	0	1	0	0	0	1	NO	NO	NO	NO	O	NO	NO	NO	NO	NO	NO	NA	NA	23.88	NA	2076	27	2076	0.0130058	1930	24	1933	0.0124159	0.888937	14	14	Artifact (10)
IT_17	2	25462019	A	AC	DNMT3A	ENST00000264709	frameshift_variant	tgg/tggG|p.Asn797fs/c.2385dupG	1760	23	1771	0.012987	0	0	0	0	1	0	0	0	1	NO	NO	NO	NO	O	NO	NO	NO	NO	NO	NO	NA	NA	24.04	NA	950	7	950	0.00736842	810	16	821	0.0194884	0.0335242	14	14	Artifact (10)
IT_18	2	25462019	A	AC	DNMT3A	ENST00000264709	frameshift_variant	tgg/tggG|p.Asn797fs/c.2385dupG	3144	33	3157	0.010453	0	0	0	0	1	0	0	0	1	NO	NO	NO	NO	O	NO	NO	NO	NO	NO	NO	NA	NA	24.35	NA	1668	16	1673	0.00956366	1476	17	1484	0.0114555	0.6047	14	14	Artifact (10)
IT_23	2	25462035	GC	G	DNMT3A	ENST00000264709	frameshift_variant	agg/|p.Ala791fs/c.2370delG	3265	35	3304	0.0105932	0	0	0	0	1	0	0	0	1	NO	NO	NO	NO	O	NO	NO	NO	NO	NO	NO	NA	NA	21.59	NA	1568	34	1605	0.0211838	1697	1	1699	0.000588582	3.98969e-10	24	24	Artifact (11)
IT_24	2	25462035	GC	G	DNMT3A	ENST00000264709	frameshift_variant	gcc/|p.Ala791fs/c.2371delG	489	179	673	0.265973	1	1	0	0	1	1	0	0	4	NO	NO	NO	NO	O	NO	NO	NO	NO	NO	NO	NA	NA	19.21	NA	142	178	325	0.547692	347	1	348	0.00287356	3.03874e-71	24	24	Artifact (5)
IT_01	2	25462035	GC	G	DNMT3A	ENST00000264709	frameshift_variant	agg/|p.Ala791fs/c.2370delG	2327	164	2494	0.0657578	0	0	0	0	1	1	0	0	2	NO	NO	NO	NO	O	NO	NO	NO	NO	NO	NO	NA	NA	22.38	NA	1102	163	1267	0.12865	1225	1	1227	0.000814996	5.45909e-49	24	24	Artifact (7)
IT_02	2	25462035	GC	G	DNMT3A	ENST00000264709	frameshift_variant	agg/|p.Ala791fs/c.2370delG	609	39	649	0.0600924	0	0	0	0	1	1	0	0	2	NO	NO	NO	NO	O	NO	NO	NO	NO	NO	NO	NA	NA	22.6	NA	275	38	314	0.121019	334	1	335	0.00298507	8.37671e-12	24	24	Artifact (7)
IT_03	2	25462035	GC	G	DNMT3A	ENST00000264709	frameshift_variant	gcc/|p.Ala791fs/c.2371delG	583	67	652	0.102761	0	1	0	0	1	1	0	0	3	NO	NO	NO	NO	O	NO	NO	NO	NO	NO	NO	NA	NA	23.38	NA	250	66	318	0.207547	333	1	334	0.00299401	2.84437e-21	24	24	Artifact (6)
IT_04	2	25462035	GC	G	DNMT3A	ENST00000264709	frameshift_variant	gcc/|p.Ala791fs/c.2371delG	661	70	733	0.095498	0	1	0	0	1	1	0	0	3	NO	NO	NO	NO	O	NO	NO	NO	NO	NO	NO	NA	NA	23.12	NA	316	69	387	0.178295	345	1	346	0.00289017	1.40254e-19	24	24	Artifact (7)
IT_07	2	25462035	GC	G	DNMT3A	ENST00000264709	frameshift_variant	agg/|p.Ala791fs/c.2370delG	1850	39	1896	0.0205696	0	0	0	0	1	0	0	0	1	NO	NO	NO	NO	O	NO	NO	NO	NO	NO	NO	NA	NA	21.4	NA	894	38	937	0.040555	956	1	959	0.00104275	3.271e-11	24	24	Artifact (9)
IT_08	2	25462035	GC	G	DNMT3A	ENST00000264709	frameshift_variant	agg/|p.Ala791fs/c.2370delG	1500	25	1526	0.0163827	0	0	0	0	1	0	0	0	1	NO	NO	NO	NO	O	NO	NO	NO	NO	NO	NO	NA	NA	21.54	NA	728	24	752	0.0319149	772	1	774	0.00129199	5.07117e-07	24	24	Artifact (11)
IT_09	2	25462035	GC	G	DNMT3A	ENST00000264709	frameshift_variant	agg/|p.Ala791fs/c.2370delG	2762	192	2958	0.0649087	0	0	0	0	1	1	0	0	2	NO	NO	NO	NO	O	NO	NO	NO	NO	NO	NO	NA	NA	21.59	NA	1230	187	1420	0.13169	1532	5	1538	0.00325098	4.11044e-55	24	24	Artifact (7)
IT_10	2	25462035	GC	G	DNMT3A	ENST00000264709	frameshift_variant	agg/|p.Ala791fs/c.2370delG	2952	155	3111	0.0498232	0	0	0	0	1	1	0	0	2	NO	NO	NO	NO	O	NO	NO	NO	NO	NO	NO	NA	NA	22.16	NA	1373	152	1528	0.0994764	1579	3	1583	0.00189514	1.89107e-44	24	24	Artifact (8)
IT_11	2	25462035	GC	G	DNMT3A	ENST00000264709	frameshift_variant	agg/|p.Ala791fs/c.2370delG	3993	201	4195	0.0479142	0	0	0	0	1	1	0	0	2	NO	NO	NO	NO	O	NO	NO	NO	NO	NO	NO	NA	NA	26.87	NA	1884	201	2086	0.0963567	2109	0	2109	0	6.01997e-64	24	24	Artifact (8)
IT_12	2	25462035	GC	G	DNMT3A	ENST00000264709	frameshift_variant	agg/|p.Ala791fs/c.2370delG	4702	181	4890	0.0370143	0	0	0	0	1	1	0	0	2	NO	NO	NO	NO	O	NO	NO	NO	NO	NO	NO	NA	NA	26.75	NA	2274	180	2457	0.0732601	2428	1	2433	0.000411015	5.95074e-54	24	24	Artifact (8)
IT_13	2	25462035	GC	G	DNMT3A	ENST00000264709	frameshift_variant	agg/|p.Ala791fs/c.2370delG	2189	191	2384	0.0801174	0	0	0	0	1	1	0	0	2	NO	NO	NO	NO	O	NO	NO	NO	NO	NO	NO	NA	NA	26.17	NA	1045	191	1240	0.154032	1144	0	1144	0	2.63134e-58	24	24	Artifact (7)
IT_14	2	25462035	GC	G	DNMT3A	ENST00000264709	frameshift_variant	agg/|p.Ala791fs/c.2370delG	1637	121	1760	0.06875	0	0	0	0	1	1	0	0	2	NO	NO	NO	NO	O	NO	NO	NO	NO	NO	NO	NA	NA	26.01	NA	830	121	953	0.126967	807	0	807	0	1.85775e-34	24	24	Artifact (7)
IT_15	2	25462035	GC	G	DNMT3A	ENST00000264709	frameshift_variant	agg/|p.Ala791fs/c.2370delG	1453	70	1525	0.0459016	0	0	0	0	1	1	0	0	2	NO	NO	NO	NO	O	NO	NO	NO	NO	NO	NO	NA	NA	24.76	NA	720	70	792	0.0883838	733	0	733	0	3.19871e-21	24	24	Artifact (8)
IT_05	2	25462035	GC	G	DNMT3A	ENST00000264709	frameshift_variant	gcc/|p.Ala791fs/c.2371delG	2966	581	3560	0.163202	0	1	0	0	1	1	0	0	3	NO	NO	NO	NO	O	NO	NO	NO	NO	NO	NO	NA	NA	20.51	NA	1271	579	1863	0.310789	1695	2	1697	0.00117855	4.2438e-182	24	24	Artifact (6)
IT_06	2	25462035	GC	G	DNMT3A	ENST00000264709	frameshift_variant	agg/|p.Ala791fs/c.2370delG	3455	576	4040	0.142574	0	0	0	0	1	1	0	0	2	NO	NO	NO	NO	O	NO	NO	NO	NO	NO	NO	NA	NA	20.28	NA	1466	575	2049	0.280625	1989	1	1991	0.00050226	3.65868e-188	24	24	Artifact (6)
IT_17	2	25462035	GC	G	DNMT3A	ENST00000264709	frameshift_variant	agg/|p.Ala791fs/c.2370delG	1707	102	1810	0.0563536	0	0	0	0	1	1	0	0	2	NO	NO	NO	NO	O	NO	NO	NO	NO	NO	NO	NA	NA	25.29	NA	837	101	939	0.107561	870	1	871	0.00114811	1.03672e-28	24	24	Artifact (7)
IT_18	2	25462035	GC	G	DNMT3A	ENST00000264709	frameshift_variant	agg/|p.Ala791fs/c.2370delG	2994	196	3193	0.0613843	0	0	0	0	1	1	0	0	2	NO	NO	NO	NO	O	NO	NO	NO	NO	NO	NO	NA	NA	25.74	NA	1449	196	1648	0.118932	1545	0	1545	0	1.11834e-59	24	24	Artifact (7)
IT_19	2	25462035	GC	G	DNMT3A	ENST00000264709	frameshift_variant	agg/|p.Ala791fs/c.2370delG	9537	309	9857	0.0313483	0	0	0	0	1	1	0	0	2	NO	NO	NO	NO	O	NO	NO	NO	NO	NO	NO	NA	NA	27.43	NA	5586	303	5898	0.0513733	3951	6	3959	0.00151553	6.74189e-60	24	24	Artifact (8)
IT_20	2	25462035	GC	G	DNMT3A	ENST00000264709	frameshift_variant	agg/|p.Ala791fs/c.2370delG	1583	67	1654	0.0405079	0	0	0	0	1	0	0	0	1	NO	NO	NO	NO	O	NO	NO	NO	NO	NO	NO	NA	NA	26.98	NA	823	66	893	0.0739082	760	1	761	0.00131406	3.18484e-17	24	24	Artifact (9)
IT_21	2	25462035	GC	G	DNMT3A	ENST00000264709	frameshift_variant	agg/|p.Ala791fs/c.2370delG	618	45	664	0.0677711	0	0	0	0	1	1	0	0	2	NO	NO	NO	NO	O	NO	NO	NO	NO	NO	NO	NA	NA	26.89	NA	303	44	348	0.126437	315	1	316	0.00316456	3.42107e-12	24	24	Artifact (7)
IT_22	2	25462035	GC	G	DNMT3A	ENST00000264709	frameshift_variant	agg/|p.Ala791fs/c.2370delG	4032	174	4216	0.0412713	0	0	0	0	1	1	0	0	2	NO	NO	NO	NO	O	NO	NO	NO	NO	NO	NO	NA	NA	27.84	NA	2144	173	2324	0.0744406	1888	1	1892	0.000528541	6.87018e-45	24	24	Artifact (8)
IT_06	2	25462039	T	TG	DNMT3A	ENST00000264709	frameshift_variant	cac/caCc|p.Arg790fs/c.2366_2367insC	4021	42	4036	0.0104063	0	0	0	0	1	0	0	0	1	NO	NO	NO	NO	O	NO	NO	NO	NO	NO	NO	NA	NA	25.25	NA	2032	41	2044	0.0200587	1989	1	1992	0.000502008	2.17293e-11	3	3	Artifact (6)
IT_17	2	25462039	T	TG	DNMT3A	ENST00000264709	frameshift_variant	cac/caCc|p.Arg790fs/c.2366_2367insC	1802	40	1809	0.0221117	0	0	0	0	1	0	0	0	1	NO	NO	NO	NO	O	NO	NO	NO	NO	NO	NO	NA	NA	27.28	NA	927	40	933	0.0428725	875	0	876	0	7.75152e-12	3	3	Artifact (4)
IT_18	2	25462039	T	TG	DNMT3A	ENST00000264709	frameshift_variant	cac/caCc|p.Arg790fs/c.2366_2367insC	3170	44	3185	0.0138148	0	0	0	0	1	0	0	0	1	NO	NO	NO	NO	O	NO	NO	NO	NO	NO	NO	NA	NA	27.68	NA	1621	44	1634	0.0269278	1549	0	1551	0	2.13152e-13	3	3	Artifact (6)
IT_13	2	25462068	A	AT	DNMT3A	ENST00000264709	frameshift_variant	atg/atgA|p.Ile780fs/c.2337_2338insA	2274	80	2276	0.0351494	0	0	0	0	1	0	0	0	1	NO	NO	NO	NA	NA	NO	NO	NO	NO	NO	NO	NA	NA	26.99	NA	1137	80	1139	0.0702371	1137	0	1137	0	4.36848e-24	10	12	Artifact (7)
IT_14	2	25462068	A	AT	DNMT3A	ENST00000264709	frameshift_variant	atg/atgA|p.Ile780fs/c.2337_2338insA	1720	71	1721	0.0412551	0	0	0	0	1	0	0	0	1	NO	NO	NO	NA	NA	NO	NO	NO	NO	NO	NO	NA	NA	26.84	NA	902	71	902	0.078714	818	0	819	0	6.14977e-20	10	12	Artifact (7)
IT_15	2	25462068	A	AT	DNMT3A	ENST00000264709	frameshift_variant	atg/atgA|p.Ile780fs/c.2337_2338insA	1555	22	1559	0.0141116	0	0	0	0	1	0	0	0	1	NO	NO	NO	NA	NA	NO	NO	NO	NO	NO	NO	NA	NA	25.98	NA	796	22	799	0.0275344	759	0	760	0	5.53867e-07	10	12	Artifact (9)
IT_06	2	25462068	A	AT	DNMT3A	ENST00000264709	frameshift_variant	atg/atgA|p.Ile780fs/c.2337_2338insA	4009	44	4010	0.0109726	0	0	0	0	1	0	0	0	1	NO	NO	NO	NA	NA	NO	NO	NO	NO	NO	NO	NA	NA	26.93	NA	2001	44	2002	0.021978	2008	0	2008	0	9.71138e-14	10	12	Artifact (9)
IT_17	2	25462068	A	AT	DNMT3A	ENST00000264709	frameshift_variant	atg/atgA|p.Ile780fs/c.2337_2338insA	1783	45	1785	0.0252101	0	0	0	0	1	0	0	0	1	NO	NO	NO	NA	NA	NO	NO	NO	NO	NO	NO	NA	NA	26.34	NA	894	45	894	0.0503356	889	0	891	0	6.11446e-14	10	12	Artifact (7)
IT_18	2	25462068	A	AT	DNMT3A	ENST00000264709	frameshift_variant	atg/atgA|p.Ile780fs/c.2337_2338insA	3122	73	3125	0.02336	0	0	0	0	1	0	0	0	1	NO	NO	NO	NA	NA	NO	NO	NO	NO	NO	NO	NA	NA	26.18	NA	1544	73	1546	0.0472186	1578	0	1579	0	1.31156e-22	10	12	Artifact (7)
IT_19	2	25462068	A	AT	DNMT3A	ENST00000264709	frameshift_variant	atg/atgA|p.Ile780fs/c.2337_2338insA	9765	175	9768	0.0179156	0	0	0	0	1	0	0	0	1	NO	NO	NO	NA	NA	NO	NO	NO	NO	NO	NO	NA	NA	26.81	NA	5756	175	5759	0.0303872	4009	0	4009	0	2.5589e-40	10	12	Artifact (9)
IT_20	2	25462068	A	AT	DNMT3A	ENST00000264709	frameshift_variant	atg/atgA|p.Ile780fs/c.2337_2338insA	1627	31	1627	0.0190535	0	0	0	0	1	0	0	0	1	NO	NO	NO	NA	NA	NO	NO	NO	NO	NO	NO	NA	NA	26.96	NA	862	31	862	0.0359629	765	0	765	0	4.72478e-09	10	12	Artifact (9)
IT_22	2	25462068	A	AT	DNMT3A	ENST00000264709	frameshift_variant	atg/atgA|p.Ile780fs/c.2337_2338insA	4190	61	4190	0.0145585	0	0	0	0	1	0	0	0	1	NO	NO	NO	NA	NA	NO	NO	NO	NO	NO	NO	NA	NA	26.77	NA	2284	60	2284	0.0262697	1906	1	1906	0.000524659	6.65815e-15	10	12	Artifact (9)
IT_16	2	25462076	A	AG	DNMT3A	ENST00000264709	frameshift_variant	aac/aacC|p.Val778fs/c.2328dupC	2193	24	2194	0.0109389	0	0	0	0	1	0	0	0	1	NO	NO	NO	NO	O	NO	NO	NO	NO	NO	NO	NA	NA	27.11	NA	1309	24	1310	0.0183206	884	0	884	0	6.34691e-06	2	26	Artifact (7)
IT_18	2	25462076	A	AG	DNMT3A	ENST00000264709	frameshift_variant	aac/aacC|p.Val778fs/c.2328dupC	3471	90	3475	0.0258993	0	0	0	0	1	0	0	0	1	NO	NO	NO	NO	O	NO	NO	NO	NO	NO	NO	NA	NA	26.96	NA	1837	5	1839	0.00271887	1634	85	1636	0.051956	1.50511e-21	2	26	Artifact (5)
IT_23	2	25462076	AG	A	DNMT3A	ENST00000264709	frameshift_variant	cct/|p.Pro777fs/c.2329delC	4445	71	4523	0.0156975	0	0	0	0	1	0	0	0	1	NO	NO	NO	NO	O	NO	NO	NO	7.413e-05	NO	NO	NA	NA	23.82	NA	2331	1	2334	0.000428449	2114	70	2189	0.0319781	1.73571e-21	24	26	Artifact (10)
IT_24	2	25462076	AG	A	DNMT3A	ENST00000264709	frameshift_variant	cct/|p.Pro777fs/c.2330delC	999	107	1107	0.0966576	0	1	0	0	1	1	0	0	3	NO	NO	NO	NO	O	NO	NO	NO	7.413e-05	NO	NO	NA	NA	22.22	NA	599	0	599	0	400	107	508	0.21063	6.56379e-40	24	26	Artifact (6)
IT_01	2	25462076	AG	A	DNMT3A	ENST00000264709	frameshift_variant	cct/|p.Pro777fs/c.2330delC	2447	1059	3519	0.300938	0	1	0	0	1	1	0	0	3	NO	NO	NO	NO	O	NO	NO	NO	7.413e-05	NO	NO	NA	NA	26.98	NA	1915	1	1916	0.000521921	532	1058	1603	0.660012	0	24	26	Artifact (6)
IT_02	2	25462076	AG	A	DNMT3A	ENST00000264709	frameshift_variant	cct/|p.Pro777fs/c.2330delC	739	266	1010	0.263366	0	1	0	0	1	1	0	0	3	NO	NO	NO	NO	O	NO	NO	NO	7.413e-05	NO	NO	NA	NA	25.93	NA	504	0	505	0	235	266	505	0.526733	1.84781e-102	24	26	Artifact (6)
IT_03	2	25462076	AG	A	DNMT3A	ENST00000264709	frameshift_variant	cct/|p.Pro777fs/c.2330delC	558	295	855	0.345029	0	1	0	0	1	1	0	0	3	NO	NO	NO	NO	O	NO	NO	NO	7.413e-05	NO	NO	NA	NA	26.74	NA	433	0	434	0	125	295	421	0.700713	2.20872e-128	24	26	Artifact (6)
IT_04	2	25462076	AG	A	DNMT3A	ENST00000264709	frameshift_variant	cct/|p.Pro777fs/c.2330delC	664	304	970	0.313402	1	1	0	0	1	1	0	0	4	NO	NO	NO	NO	O	NO	NO	NO	7.413e-05	NO	NO	NA	NA	26.87	NA	539	0	539	0	125	304	431	0.705336	9.73683e-150	24	26	Artifact (5)
IT_07	2	25462076	AG	A	DNMT3A	ENST00000264709	frameshift_variant	cct/|p.Pro777fs/c.2329delC	3234	162	3400	0.0476471	0	0	0	0	1	0	0	0	1	NO	NO	NO	NO	O	NO	NO	NO	7.413e-05	NO	NO	NA	NA	24.97	NA	1993	5	1999	0.00250125	1241	157	1401	0.112063	1.04393e-55	24	26	Artifact (8)
IT_08	2	25462076	AG	A	DNMT3A	ENST00000264709	frameshift_variant	cct/|p.Pro777fs/c.2330delC	2569	379	2953	0.128344	0	1	0	0	1	1	0	0	3	NO	NO	NO	NO	O	NO	NO	NO	7.413e-05	NO	NO	NA	NA	25.03	NA	1653	1	1655	0.00060423	916	378	1298	0.291217	3.47461e-149	24	26	Artifact (6)
IT_09	2	25462076	AG	A	DNMT3A	ENST00000264709	frameshift_variant	cct/|p.Pro777fs/c.2330delC	3241	1345	4611	0.291694	0	1	0	0	1	1	0	0	3	NO	NO	NO	NO	O	NO	NO	NO	7.413e-05	NO	NO	NA	NA	26.77	NA	2612	6	2618	0.00229183	629	1339	1993	0.671851	0	24	26	Artifact (6)
IT_10	2	25462076	AG	A	DNMT3A	ENST00000264709	frameshift_variant	cct/|p.Pro777fs/c.2330delC	2929	1417	4404	0.321753	0	1	0	0	1	1	0	0	3	NO	NO	NO	NO	O	NO	NO	NO	7.413e-05	NO	NO	NA	NA	26.62	NA	2242	2	2247	0.000890076	687	1415	2157	0.656004	0	24	26	Artifact (6)
IT_11	2	25462076	AG	A	DNMT3A	ENST00000264709	frameshift_variant	cct/|p.Pro777fs/c.2329delC	4270	287	4565	0.0628697	0	0	0	0	1	1	0	0	2	NO	NO	NO	NO	O	NO	NO	NO	7.413e-05	NO	NO	NA	NA	26.3	NA	2353	0	2354	0	1917	287	2211	0.129806	9.87676e-96	24	26	Artifact (6)
IT_12	2	25462076	AG	A	DNMT3A	ENST00000264709	frameshift_variant	cct/|p.Pro777fs/c.2329delC	5836	274	6126	0.0447274	0	0	0	0	1	1	0	0	2	NO	NO	NO	NO	O	NO	NO	NO	7.413e-05	NO	NO	NA	NA	25.98	NA	3157	2	3160	0.000632911	2679	272	2966	0.091706	1.35333e-85	24	26	Artifact (7)
IT_13	2	25462076	AG	A	DNMT3A	ENST00000264709	frameshift_variant	cct/|p.Pro777fs/c.2329delC	2717	85	2814	0.0302061	0	0	0	0	1	0	0	0	1	NO	NO	NO	NO	O	NO	NO	NO	7.413e-05	NO	NO	NA	NA	25.81	NA	1541	0	1543	0	1176	85	1271	0.0668765	6.71462e-31	24	26	Artifact (8)
IT_14	2	25462076	AG	A	DNMT3A	ENST00000264709	frameshift_variant	cct/|p.Pro777fs/c.2329delC	2655	81	2747	0.0294867	0	0	0	0	1	0	0	0	1	NO	NO	NO	NO	O	NO	NO	NO	7.413e-05	NO	NO	NA	NA	25.98	NA	1578	0	1578	0	1077	81	1169	0.06929	1.06931e-31	24	26	Artifact (8)
IT_15	2	25462076	AG	A	DNMT3A	ENST00000264709	frameshift_variant	cct/|p.Pro777fs/c.2329delC	3615	337	3963	0.0850366	0	0	0	0	1	1	0	0	2	NO	NO	NO	NO	O	NO	NO	NO	7.413e-05	NO	NO	NA	NA	24.96	NA	2374	7	2382	0.00293871	1241	330	1581	0.208729	2.73482e-130	24	26	Artifact (6)
IT_05	2	25462076	AG	A	DNMT3A	ENST00000264709	frameshift_variant	cct/|p.Pro777fs/c.2329delC	5224	347	5576	0.062231	0	0	0	0	1	1	0	0	2	NO	NO	NO	NO	O	NO	NO	NO	7.413e-05	NO	NO	NA	NA	25.07	NA	3341	4	3348	0.00119474	1883	343	2228	0.15395	8.62092e-137	24	26	Artifact (6)
IT_06	2	25462076	AG	A	DNMT3A	ENST00000264709	frameshift_variant	cct/|p.Pro777fs/c.2330delC	4239	1276	5525	0.23095	0	1	0	0	1	1	0	0	3	NO	NO	NO	NO	O	NO	NO	NO	7.413e-05	NO	NO	NA	NA	25.54	NA	3008	0	3008	0	1231	1276	2517	0.506953	0	24	26	Artifact (6)
IT_17	2	25462076	AG	A	DNMT3A	ENST00000264709	frameshift_variant	cct/|p.Pro777fs/c.2329delC	2268	103	2379	0.0432955	0	0	0	0	1	1	0	0	2	NO	NO	NO	NO	O	NO	NO	NO	7.413e-05	NO	NO	NA	NA	25.17	NA	1260	0	1261	0	1008	103	1118	0.0921288	8.8574e-36	24	26	Artifact (7)
IT_18	2	25462076	AG	A	DNMT3A	ENST00000264709	frameshift_variant	cct/|p.Pro777fs/c.2329delC	3371	97	3474	0.0279217	0	0	0	0	1	1	0	0	2	NO	NO	NO	NO	O	NO	NO	NO	7.413e-05	NO	NO	NA	NA	24.11	NA	1836	0	1838	0	1535	97	1636	0.059291	3.72005e-33	24	26	Artifact (7)
IT_19	2	25462076	AG	A	DNMT3A	ENST00000264709	frameshift_variant	cct/|p.Pro777fs/c.2329delC	10829	493	11344	0.0434591	0	0	0	0	1	1	0	0	2	NO	NO	NO	NO	O	NO	NO	NO	7.413e-05	NO	NO	NA	NA	27.02	NA	7003	8	7013	0.00114074	3826	485	4331	0.111983	1.97006e-196	24	26	Artifact (7)
IT_20	2	25462076	AG	A	DNMT3A	ENST00000264709	frameshift_variant	cct/|p.Pro777fs/c.2329delC	1802	65	1867	0.0348152	0	0	0	0	1	0	0	0	1	NO	NO	NO	NO	O	NO	NO	NO	7.413e-05	NO	NO	NA	NA	26.51	NA	1007	0	1007	0	795	65	860	0.0755814	3.38729e-23	24	26	Artifact (8)
IT_21	2	25462076	AG	A	DNMT3A	ENST00000264709	frameshift_variant	cct/|p.Pro777fs/c.2329delC	2842	29	2874	0.0100905	0	0	0	0	1	0	0	0	1	NO	NO	NO	NO	O	NO	NO	NO	7.413e-05	NO	NO	NA	NA	27.29	NA	1735	7	1743	0.00401606	1107	22	1131	0.0194518	7.44454e-05	24	26	Artifact (10)
IT_22	2	25462076	AG	A	DNMT3A	ENST00000264709	frameshift_variant	cct/|p.Pro777fs/c.2329delC	6549	69	6627	0.010412	0	0	0	0	1	0	0	0	1	NO	NO	NO	NO	O	NO	NO	NO	7.413e-05	NO	NO	NA	NA	27.06	NA	4037	7	4049	0.00172882	2512	62	2578	0.0240497	9.3236e-19	24	26	Artifact (10)
IT_10	2	25462076	AGG	A	DNMT3A	ENST00000264709	frameshift_variant	aaccct/|p.Pro777fs/c.2328_2329delCC	2929	52	4404	0.0118074	0	0	0	0	1	0	0	0	1	NO	NO	NO	NO	O	NO	NO	NO	7.413e-05	NO	NO	NA	NA	26.62	NA	2242	0	2247	0	687	52	2157	0.0241076	7.92446e-33	1	26	Artifact (6)
IT_18	2	25462079	G	GGT	DNMT3A	ENST00000264709	frameshift_variant	aac/aaACc|p.Asn776fs/c.2327_2328insAC	3467	41	3471	0.0118122	0	0	0	0	1	0	0	0	1	NO	NO	NO	NO	O	NO	NO	NO	NO	NO	NO	NA	NA	23.71	NA	1828	0	1828	0	1639	41	1643	0.0249544	6.00408e-14	1	1	Artifact (6)
IT_12	2	25462084	A	G	DNMT3A	ENST00000264709	missense_variant	Tcc/Ccc|p.Ser775Pro/c.2323T>C	1565	62	1627	0.0381069	0	0	0	0	0	1	0	0	1	NO	0.001	NO	NO	O	NO	rs74708853	NO	8.236e-06	NO	NO	-2.511	Deleterious	29.8	27.02	906	3	909	0.00330033	659	59	718	0.0821727	2.09008e-18	5	5	Artifact (4)
IT_17	2	25462084	A	G	DNMT3A	ENST00000264709	missense_variant	Tcc/Ccc|p.Ser775Pro/c.2323T>C	677	37	714	0.0518207	0	0	0	0	1	0	0	0	1	NO	0.001	NO	NO	O	NO	rs74708853	NO	8.236e-06	NO	NO	-2.511	Deleterious	29.84	25.35	401	0	401	0	276	37	313	0.118211	1.57843e-14	5	5	Artifact (4)
IT_18	2	25462084	A	G	DNMT3A	ENST00000264709	missense_variant	Tcc/Ccc|p.Ser775Pro/c.2323T>C	469	56	525	0.106667	0	0	0	0	1	1	0	0	2	NO	0.001	NO	NO	O	NO	rs74708853	NO	8.236e-06	NO	NO	-2.511	Deleterious	29.55	29	362	1	363	0.00275482	107	55	162	0.339506	2.01341e-30	5	5	Artifact (3)
IT_23	2	25463190	T	TC	DNMT3A	ENST00000264709	frameshift_variant	agg/agGg|p.Asp768fs/c.2300dupG	1783	22	1791	0.0122836	0	0	0	0	1	0	0	0	1	NO	NO	NO	NA	NA	NO	NO	NO	NO	NO	NO	NA	NA	28.71	NA	927	17	932	0.0182403	856	5	859	0.00582072	0.018724	5	5	Artifact (7)
IT_12	2	25463190	T	TC	DNMT3A	ENST00000264709	frameshift_variant	agg/agGg|p.Asp768fs/c.2300dupG	3875	39	3881	0.010049	0	0	0	0	1	0	0	0	1	NO	NO	NO	NA	NA	NO	NO	NO	NO	NO	NO	NA	NA	30.2	NA	1983	36	1986	0.0181269	1892	3	1895	0.00158311	4.99274e-08	5	5	Artifact (8)
IT_15	2	25463190	T	TC	DNMT3A	ENST00000264709	frameshift_variant	agg/agGg|p.Asp768fs/c.2300dupG	1494	20	1497	0.0133601	0	0	0	0	1	0	0	0	1	NO	NO	NO	NA	NA	NO	NO	NO	NO	NO	NO	NA	NA	29.12	NA	766	16	768	0.0208333	728	4	729	0.00548697	0.0121598	5	5	Artifact (7)
IT_13	2	25463203	T	TA	DNMT3A	ENST00000264709	frameshift_variant	gtt/gTtt|p.Ser764fs/c.2287_2288insT	1945	106	1947	0.0544427	0	0	0	0	1	1	0	0	2	NO	NO	NO	NO	O	NO	NO	NO	NO	NO	NO	NA	NA	30.65	NA	1062	0	1063	0	883	106	884	0.11991	1.21895e-35	8	19	Artifact (5)
IT_14	2	25463203	T	TA	DNMT3A	ENST00000264709	frameshift_variant	gtt/gTtt|p.Ser764fs/c.2287_2288insT	1709	76	1711	0.0444185	0	0	0	0	1	1	0	0	2	NO	NO	NO	NO	O	NO	NO	NO	NO	NO	NO	NA	NA	30.62	NA	955	0	956	0	754	76	755	0.100662	7.76579e-27	8	19	Artifact (6)
IT_17	2	25463203	T	TA	DNMT3A	ENST00000264709	frameshift_variant	gtt/gTtt|p.Ser764fs/c.2287_2288insT	1511	61	1516	0.0402375	0	0	0	0	1	0	0	0	1	NO	NO	NO	NO	O	NO	NO	NO	NO	NO	NO	NA	NA	30.39	NA	843	5	847	0.00590319	668	56	669	0.083707	1.56166e-14	8	19	Artifact (7)
IT_18	2	25463203	T	TA	DNMT3A	ENST00000264709	frameshift_variant	gtt/gTtt|p.Ser764fs/c.2287_2288insT	2102	91	2105	0.0432304	0	0	0	0	1	0	0	0	1	NO	NO	NO	NO	O	NO	NO	NO	NO	NO	NO	NA	NA	30.19	NA	1187	8	1189	0.00672834	915	83	916	0.0906114	6.47831e-21	8	19	Artifact (7)
IT_19	2	25463203	T	TA	DNMT3A	ENST00000264709	frameshift_variant	gtt/gTtt|p.Ser764fs/c.2287_2288insT	3374	96	3374	0.0284529	0	0	0	0	1	0	0	0	1	NO	NO	NO	NO	O	NO	NO	NO	NO	NO	NO	NA	NA	31.25	NA	2299	1	2299	0.000434972	1075	95	1075	0.0883721	6.67225e-45	8	19	Artifact (7)
IT_20	2	25463203	T	TA	DNMT3A	ENST00000264709	frameshift_variant	gtt/gTtt|p.Ser764fs/c.2287_2288insT	1619	51	1619	0.0315009	0	0	0	0	1	0	0	0	1	NO	NO	NO	NO	O	NO	NO	NO	NO	NO	NO	NA	NA	30.63	NA	956	1	956	0.00104603	663	50	663	0.0754148	3.64077e-18	8	19	Artifact (7)
IT_21	2	25463203	T	TA	DNMT3A	ENST00000264709	frameshift_variant	gtt/gTtt|p.Ser764fs/c.2287_2288insT	1180	39	1181	0.0330229	0	0	0	0	1	0	0	0	1	NO	NO	NO	NO	O	NO	NO	NO	NO	NO	NO	NA	NA	30.82	NA	731	2	731	0.00273598	449	37	450	0.0822222	2.09428e-13	8	19	Artifact (7)
IT_22	2	25463203	T	TA	DNMT3A	ENST00000264709	frameshift_variant	gtt/gTtt|p.Ser764fs/c.2287_2288insT	5791	200	5795	0.0345125	0	0	0	0	1	0	0	0	1	NO	NO	NO	NO	O	NO	NO	NO	NO	NO	NO	NA	NA	30.87	NA	3344	3	3347	0.000896325	2447	197	2448	0.0804739	3.87743e-67	8	19	Artifact (7)
IT_24	2	25463203	TA	T	DNMT3A	ENST00000264709	frameshift_variant	gtt/|p.Ser764fs/c.2288delT	841	24	865	0.0277457	0	0	0	0	1	0	0	0	1	NO	NO	NO	NO	O	NO	NO	NO	NO	NO	NO	NA	NA	28.58	NA	555	2	557	0.00359066	286	22	308	0.0714286	1.04049e-08	11	19	Artifact (7)
IT_01	2	25463203	TA	T	DNMT3A	ENST00000264709	frameshift_variant	gtt/|p.Ser764fs/c.2288delT	3088	78	3169	0.0246134	0	0	0	0	1	0	0	0	1	NO	NO	NO	NO	O	NO	NO	NO	NO	NO	NO	NA	NA	27.31	NA	1897	0	1897	0	1191	78	1272	0.0613208	2.48989e-32	11	19	Artifact (7)
IT_09	2	25463203	TA	T	DNMT3A	ENST00000264709	frameshift_variant	gtt/|p.Ser764fs/c.2288delT	3659	63	3724	0.0169173	0	0	0	0	1	0	0	0	1	NO	NO	NO	NO	O	NO	NO	NO	NO	NO	NO	NA	NA	28.01	NA	2170	3	2173	0.00138058	1489	60	1551	0.0386847	6.23478e-20	11	19	Artifact (9)
IT_10	2	25463203	TA	T	DNMT3A	ENST00000264709	frameshift_variant	gtt/|p.Ser764fs/c.2288delT	3753	69	3828	0.0180251	0	0	0	0	1	0	0	0	1	NO	NO	NO	NO	O	NO	NO	NO	NO	NO	NO	NA	NA	28.16	NA	2231	1	2233	0.000447828	1522	68	1595	0.0426332	2.21683e-25	11	19	Artifact (9)
IT_14	2	25463203	TA	T	DNMT3A	ENST00000264709	frameshift_variant	gtt/|p.Ser764fs/c.2288delT	1983	30	2014	0.0148957	0	0	0	0	1	0	0	0	1	NO	NO	NO	NO	O	NO	NO	NO	NO	NO	NO	NA	NA	28.79	NA	1183	0	1184	0	800	30	830	0.0361446	2.09403e-12	11	19	Artifact (9)
IT_06	2	25463203	TA	T	DNMT3A	ENST00000264709	frameshift_variant	gtt/|p.Ser764fs/c.2288delT	2214	26	2240	0.0116071	0	0	0	0	1	0	0	0	1	NO	NO	NO	NO	O	NO	NO	NO	NO	NO	NO	NA	NA	28.34	NA	1446	0	1446	0	768	26	794	0.0327456	1.48743e-12	11	19	Artifact (9)
IT_17	2	25463203	TA	T	DNMT3A	ENST00000264709	frameshift_variant	gtt/|p.Ser764fs/c.2288delT	1843	23	1868	0.0123126	0	0	0	0	1	0	0	0	1	NO	NO	NO	NO	O	NO	NO	NO	NO	NO	NO	NA	NA	29.39	NA	1160	1	1163	0.000859845	683	22	705	0.0312057	6.05443e-09	11	19	Artifact (9)
IT_23	2	25463207	G	GC	DNMT3A	ENST00000264709	frameshift_variant	atg/atgG|p.Val763fs/c.2283dupG	3521	41	3527	0.0116246	0	0	0	0	1	0	0	0	1	NO	NO	NO	NO	O	NO	NO	NO	NO	NO	NO	NA	NA	28.69	NA	2057	36	2060	0.0174757	1464	5	1467	0.00340832	8.03855e-05	18	18	Artifact (11)
IT_09	2	25463207	G	GC	DNMT3A	ENST00000264709	frameshift_variant	atg/atgG|p.Val763fs/c.2283dupG	3784	59	3788	0.0155755	0	0	0	0	1	0	0	0	1	NO	NO	NO	NO	O	NO	NO	NO	NO	NO	NO	NA	NA	28.2	NA	2166	54	2169	0.0248963	1618	5	1619	0.00308833	1.20627e-08	18	18	Artifact (11)
IT_10	2	25463207	G	GC	DNMT3A	ENST00000264709	frameshift_variant	atg/atgG|p.Val763fs/c.2283dupG	3898	48	3901	0.0123045	0	0	0	0	1	0	0	0	1	NO	NO	NO	NO	O	NO	NO	NO	NO	NO	NO	NA	NA	28.47	NA	2228	44	2230	0.0197309	1670	4	1671	0.00239378	2.10434e-07	18	18	Artifact (11)
IT_11	2	25463207	G	GC	DNMT3A	ENST00000264709	frameshift_variant	atg/atgG|p.Val763fs/c.2283dupG	3439	120	3440	0.0348837	0	0	0	0	1	0	0	0	1	NO	NO	NO	NO	O	NO	NO	NO	NO	NO	NO	NA	NA	28.96	NA	1735	116	1736	0.0668203	1704	4	1704	0.00234742	1.05566e-28	18	18	Artifact (9)
IT_12	2	25463207	G	GC	DNMT3A	ENST00000264709	frameshift_variant	atg/atgG|p.Val763fs/c.2283dupG	5313	134	5316	0.0252069	0	0	0	0	1	0	0	0	1	NO	NO	NO	NO	O	NO	NO	NO	NO	NO	NO	NA	NA	28.6	NA	2857	128	2858	0.0447866	2456	6	2458	0.00244101	8.65542e-27	18	18	Artifact (9)
IT_13	2	25463207	G	GC	DNMT3A	ENST00000264709	frameshift_variant	atg/atgG|p.Val763fs/c.2283dupG	2177	57	2178	0.0261708	0	0	0	0	1	0	0	0	1	NO	NO	NO	NO	O	NO	NO	NO	NO	NO	NO	NA	NA	28.05	NA	1189	54	1189	0.0454163	988	3	989	0.00303337	3.72429e-11	18	18	Artifact (9)
IT_14	2	25463207	G	GC	DNMT3A	ENST00000264709	frameshift_variant	atg/atgG|p.Val763fs/c.2283dupG	2095	40	2097	0.0190749	0	0	0	0	1	0	0	0	1	NO	NO	NO	NO	O	NO	NO	NO	NO	NO	NO	NA	NA	27.78	NA	1182	38	1183	0.0321217	913	2	914	0.00218818	1.07676e-07	18	18	Artifact (11)
IT_15	2	25463207	G	GC	DNMT3A	ENST00000264709	frameshift_variant	atg/atgG|p.Val763fs/c.2283dupG	4059	72	4063	0.0177209	0	0	0	0	1	0	0	0	1	NO	NO	NO	NO	O	NO	NO	NO	NO	NO	NO	NA	NA	28.2	NA	2565	60	2566	0.0233827	1494	12	1497	0.00801603	0.000287019	18	18	Artifact (10)
IT_16	2	25463207	G	GC	DNMT3A	ENST00000264709	frameshift_variant	atg/atgG|p.Val763fs/c.2283dupG	2250	46	2254	0.0204082	0	0	0	0	1	0	0	0	1	NO	NO	NO	NO	O	NO	NO	NO	NO	NO	NO	NA	NA	27.63	NA	1600	45	1602	0.0280899	650	1	652	0.00153374	6.99123e-06	18	18	Artifact (9)
IT_05	2	25463207	G	GC	DNMT3A	ENST00000264709	frameshift_variant	atg/atgG|p.Val763fs/c.2283dupG	2654	28	2655	0.0105461	0	0	0	0	1	0	0	0	1	NO	NO	NO	NO	O	NO	NO	NO	NO	NO	NO	NA	NA	27.62	NA	1672	27	1673	0.0161387	982	1	982	0.00101833	8.2958e-05	18	18	Artifact (11)
IT_06	2	25463207	G	GC	DNMT3A	ENST00000264709	frameshift_variant	atg/atgG|p.Val763fs/c.2283dupG	2323	30	2324	0.0129088	0	0	0	0	1	0	0	0	1	NO	NO	NO	NO	O	NO	NO	NO	NO	NO	NO	NA	NA	27.47	NA	1448	30	1448	0.0207182	875	0	876	0	1.02284e-06	18	18	Artifact (11)
IT_17	2	25463207	G	GC	DNMT3A	ENST00000264709	frameshift_variant	atg/atgG|p.Val763fs/c.2283dupG	1930	76	1931	0.0393578	0	0	0	0	1	0	0	0	1	NO	NO	NO	NO	O	NO	NO	NO	NO	NO	NO	NA	NA	27.79	NA	1163	69	1164	0.0592784	767	7	767	0.00912647	9.81728e-09	18	18	Artifact (9)
IT_18	2	25463207	G	GC	DNMT3A	ENST00000264709	frameshift_variant	atg/atgG|p.Val763fs/c.2283dupG	2310	65	2314	0.0280899	0	0	0	0	1	0	0	0	1	NO	NO	NO	NO	O	NO	NO	NO	NO	NO	NO	NA	NA	28.18	NA	1360	61	1361	0.04482	950	4	953	0.00419727	5.13912e-10	18	18	Artifact (9)
IT_19	2	25463207	G	GC	DNMT3A	ENST00000264709	frameshift_variant	atg/atgG|p.Val763fs/c.2283dupG	4777	63	4779	0.0131827	0	0	0	0	1	0	0	0	1	NO	NO	NO	NO	O	NO	NO	NO	NO	NO	NO	NA	NA	29.06	NA	3301	54	3303	0.0163488	1476	9	1476	0.00609756	0.00359901	18	18	Artifact (10)
IT_21	2	25463207	G	GC	DNMT3A	ENST00000264709	frameshift_variant	atg/atgG|p.Val763fs/c.2283dupG	1771	23	1775	0.0129577	0	0	0	0	1	0	0	0	1	NO	NO	NO	NO	O	NO	NO	NO	NO	NO	NO	NA	NA	27.36	NA	1101	21	1105	0.0190045	670	2	670	0.00298507	0.00374638	18	18	Artifact (11)
IT_22	2	25463207	G	GC	DNMT3A	ENST00000264709	frameshift_variant	atg/atgG|p.Val763fs/c.2283dupG	6528	113	6531	0.0173021	0	0	0	0	1	0	0	0	1	NO	NO	NO	NO	O	NO	NO	NO	NO	NO	NO	NA	NA	28.58	NA	3806	110	3808	0.0288866	2722	3	2723	0.00110173	8.49066e-22	18	18	Artifact (11)
IT_23	2	25463211	AT	A	DNMT3A	ENST00000264709	frameshift_variant	atg/|p.Met761fs/c.2281delA	3456	49	3520	0.0139205	0	0	0	0	1	0	0	0	1	NO	NO	NO	NO	O	NO	NO	NO	NO	NO	NO	NA	NA	27.36	NA	2045	0	2048	0	1411	49	1472	0.033288	1.43289e-19	10	10	Artifact (8)
IT_01	2	25463211	AT	A	DNMT3A	ENST00000264709	frameshift_variant	atg/|p.Met761fs/c.2281delA	3141	62	3211	0.0193086	0	0	0	0	1	0	0	0	1	NO	NO	NO	NO	O	NO	NO	NO	NO	NO	NO	NA	NA	27.02	NA	1867	0	1871	0	1274	62	1340	0.0462687	1.2279e-24	10	10	Artifact (8)
IT_02	2	25463211	AT	A	DNMT3A	ENST00000264709	frameshift_variant	atg/|p.Met761fs/c.2281delA	979	24	1007	0.0238332	0	0	0	0	1	0	0	0	1	NO	NO	NO	NO	O	NO	NO	NO	NO	NO	NO	NA	NA	27.04	NA	539	0	542	0	440	24	465	0.0516129	6.65051e-09	10	10	Artifact (6)
IT_07	2	25463211	AT	A	DNMT3A	ENST00000264709	frameshift_variant	atg/|p.Met761fs/c.2281delA	2575	50	2636	0.0189681	0	0	0	0	1	0	0	0	1	NO	NO	NO	NO	O	NO	NO	NO	NO	NO	NO	NA	NA	26.7	NA	1649	0	1652	0	926	50	984	0.050813	1.46364e-22	10	10	Artifact (8)
IT_08	2	25463211	AT	A	DNMT3A	ENST00000264709	frameshift_variant	atg/|p.Met761fs/c.2281delA	2209	59	2280	0.0258772	0	0	0	0	1	0	0	0	1	NO	NO	NO	NO	O	NO	NO	NO	NO	NO	NO	NA	NA	27.01	NA	1368	0	1372	0	841	59	908	0.064978	6.36388e-25	10	10	Artifact (6)
IT_09	2	25463211	AT	A	DNMT3A	ENST00000264709	frameshift_variant	atg/|p.Met761fs/c.2281delA	3708	48	3770	0.0127321	0	0	0	0	1	0	0	0	1	NO	NO	NO	NO	O	NO	NO	NO	NO	NO	NO	NA	NA	26.88	NA	2145	0	2151	0	1563	48	1619	0.0296479	1.50528e-18	10	10	Artifact (8)
IT_10	2	25463211	AT	A	DNMT3A	ENST00000264709	frameshift_variant	atg/|p.Met761fs/c.2281delA	3806	73	3886	0.0187854	0	0	0	0	1	0	0	0	1	NO	NO	NO	NO	O	NO	NO	NO	NO	NO	NO	NA	NA	27.01	NA	2214	0	2218	0	1592	73	1668	0.043765	6.12527e-28	10	10	Artifact (8)
IT_05	2	25463211	AT	A	DNMT3A	ENST00000264709	frameshift_variant	atg/|p.Met761fs/c.2281delA	2601	51	2653	0.0192235	0	0	0	0	1	0	0	0	1	NO	NO	NO	NO	O	NO	NO	NO	NO	NO	NO	NA	NA	26.87	NA	1667	0	1667	0	934	51	986	0.0517241	5.02473e-23	10	10	Artifact (8)
IT_06	2	25463211	AT	A	DNMT3A	ENST00000264709	frameshift_variant	atg/|p.Met761fs/c.2281delA	2287	25	2315	0.0107991	0	0	0	0	1	0	0	0	1	NO	NO	NO	NO	O	NO	NO	NO	NO	NO	NO	NA	NA	26.99	NA	1437	0	1438	0	850	25	877	0.0285063	2.27378e-11	10	10	Artifact (8)
IT_21	2	25463211	AT	A	DNMT3A	ENST00000264709	frameshift_variant	atg/|p.Met761fs/c.2281delA	1747	23	1772	0.0129797	0	0	0	0	1	0	0	0	1	NO	NO	NO	NO	O	NO	NO	NO	NO	NO	NO	NA	NA	26.66	NA	1101	0	1103	0	646	23	669	0.0343797	1.50537e-10	10	10	Artifact (8)
IT_23	2	25463222	AT	A	DNMT3A	ENST00000264709	frameshift_variant	aat/|p.Asn757fs/c.2269delA	2082	34	2121	0.0160302	0	0	0	0	1	0	0	0	1	NO	NO	NO	NO	O	NO	NO	NO	NO	NO	NO	NA	NA	28.48	NA	1291	1	1295	0.000772201	791	33	826	0.0399516	4.38827e-13	14	14	Artifact (11)
IT_01	2	25463222	AT	A	DNMT3A	ENST00000264709	frameshift_variant	aat/|p.Asn757fs/c.2269delA	1376	26	1402	0.0185449	0	0	0	0	1	0	0	0	1	NO	NO	NO	NO	O	NO	NO	NO	NO	NO	NO	NA	NA	28.11	NA	853	1	854	0.00117096	523	25	548	0.0456204	7.42201e-10	14	14	Artifact (11)
IT_07	2	25463222	AT	A	DNMT3A	ENST00000264709	frameshift_variant	aat/|p.Asn757fs/c.2269delA	1802	26	1829	0.0142154	0	0	0	0	1	0	0	0	1	NO	NO	NO	NO	O	NO	NO	NO	NO	NO	NO	NA	NA	28.52	NA	1171	1	1173	0.000852515	631	25	656	0.0381098	9.56009e-11	14	14	Artifact (11)
IT_08	2	25463222	AT	A	DNMT3A	ENST00000264709	frameshift_variant	aat/|p.Asn757fs/c.2269delA	1541	20	1562	0.0128041	0	0	0	0	1	0	0	0	1	NO	NO	NO	NO	O	NO	NO	NO	NO	NO	NO	NA	NA	28.32	NA	962	0	963	0	579	20	599	0.033389	3.92903e-09	14	14	Artifact (11)
IT_09	2	25463222	AT	A	DNMT3A	ENST00000264709	frameshift_variant	aat/|p.Asn757fs/c.2269delA	1819	28	1847	0.0151597	0	0	0	0	1	0	0	0	1	NO	NO	NO	NO	O	NO	NO	NO	NO	NO	NO	NA	NA	28.11	NA	1147	2	1149	0.00174064	672	26	698	0.0372493	1.20319e-09	14	14	Artifact (11)
IT_10	2	25463222	AT	A	DNMT3A	ENST00000264709	frameshift_variant	aat/|p.Asn757fs/c.2269delA	1876	30	1907	0.0157315	0	0	0	0	1	0	0	0	1	NO	NO	NO	NO	O	NO	NO	NO	NO	NO	NO	NA	NA	28.3	NA	1188	1	1190	0.000840336	688	29	717	0.0404463	6.56687e-12	14	14	Artifact (11)
IT_12	2	25463222	AT	A	DNMT3A	ENST00000264709	frameshift_variant	aat/|p.Asn757fs/c.2269delA	2260	25	2290	0.010917	0	0	0	0	1	0	0	0	1	NO	NO	NO	NO	O	NO	NO	NO	NO	NO	NO	NA	NA	29.28	NA	1272	1	1273	0.000785546	988	24	1017	0.0235988	4.03716e-08	14	14	Artifact (11)
IT_05	2	25463222	AT	A	DNMT3A	ENST00000264709	frameshift_variant	aat/|p.Asn757fs/c.2269delA	1744	25	1770	0.0141243	0	0	0	0	1	0	0	0	1	NO	NO	NO	NO	O	NO	NO	NO	NO	NO	NO	NA	NA	28.85	NA	1123	0	1123	0	621	25	647	0.0386399	8.5571e-12	14	14	Artifact (11)
IT_21	2	25463222	AT	A	DNMT3A	ENST00000264709	frameshift_variant	aat/|p.Asn757fs/c.2269delA	1256	31	1290	0.024031	0	0	0	0	1	0	0	0	1	NO	NO	NO	NO	O	NO	NO	NO	NO	NO	NO	NA	NA	28.83	NA	817	1	820	0.00121951	439	30	470	0.0638298	7.87871e-13	14	14	Artifact (9)
IT_22	2	25463222	AT	A	DNMT3A	ENST00000264709	frameshift_variant	aat/|p.Asn757fs/c.2269delA	1782	25	1807	0.0138351	0	0	0	0	1	0	0	0	1	NO	NO	NO	NO	O	NO	NO	NO	NO	NO	NO	NA	NA	29.5	NA	1085	0	1085	0	697	25	722	0.034626	8.49914e-11	14	14	Artifact (11)
IT_15	2	25463227	C	CA	DNMT3A	ENST00000264709	frameshift_variant	ttt/tTtt|p.Glu756fs/c.2263dupT	2947	32	2957	0.0108218	0	0	0	0	1	0	0	0	1	NO	NO	NO	NO	O	NO	NO	NO	1.647e-05	NO	NO	NA	NA	28.04	NA	1954	28	1955	0.0143223	993	4	1002	0.00399202	0.0129022	3	33	Artifact (5)
IT_23	2	25463227	C	CG	DNMT3A	ENST00000264709	frameshift_variant	ttt/tttC|p.Glu756fs/c.2265_2266insC	2117	61	2124	0.0287194	0	0	0	0	1	0	0	0	1	NO	NO	NO	NO	O	NO	NO	NO	NO	NO	NO	NA	NA	29.7	NA	1292	0	1292	0	825	61	832	0.0733173	4.18883e-25	14	33	Artifact (10)
IT_07	2	25463227	C	CG	DNMT3A	ENST00000264709	frameshift_variant	ttt/tttC|p.Glu756fs/c.2265_2266insC	1829	39	1832	0.0212882	0	0	0	0	1	0	0	0	1	NO	NO	NO	NO	O	NO	NO	NO	NO	NO	NO	NA	NA	29.9	NA	1171	0	1172	0	658	39	660	0.0590909	1.01251e-17	14	33	Artifact (10)
IT_08	2	25463227	C	CG	DNMT3A	ENST00000264709	frameshift_variant	ttt/tttC|p.Glu756fs/c.2265_2266insC	1559	35	1559	0.0224503	0	0	0	0	1	0	0	0	1	NO	NO	NO	NO	O	NO	NO	NO	NO	NO	NO	NA	NA	29.34	NA	957	0	957	0	602	35	602	0.0581395	6.42531e-15	14	33	Artifact (10)
IT_09	2	25463227	C	CG	DNMT3A	ENST00000264709	frameshift_variant	ttt/tttC|p.Glu756fs/c.2265_2266insC	1845	22	1850	0.0118919	0	0	0	0	1	0	0	0	1	NO	NO	NO	NO	O	NO	NO	NO	NO	NO	NO	NA	NA	29.53	NA	1143	0	1144	0	702	22	706	0.0311615	7.29553e-10	14	33	Artifact (12)
IT_10	2	25463227	C	CG	DNMT3A	ENST00000264709	frameshift_variant	ttt/tttC|p.Glu756fs/c.2265_2266insC	1903	59	1905	0.0309711	0	0	0	0	1	0	0	0	1	NO	NO	NO	NO	O	NO	NO	NO	NO	NO	NO	NA	NA	29.28	NA	1183	0	1184	0	720	59	721	0.0818308	5.43652e-25	14	33	Artifact (10)
IT_12	2	25463227	C	CG	DNMT3A	ENST00000264709	frameshift_variant	ttt/tttC|p.Glu756fs/c.2265_2266insC	2288	50	2290	0.0218341	0	0	0	0	1	0	0	0	1	NO	NO	NO	NO	O	NO	NO	NO	NO	NO	NO	NA	NA	29.99	NA	1266	0	1266	0	1022	50	1024	0.0488281	6.2028e-18	14	33	Artifact (10)
IT_15	2	25463227	C	CG	DNMT3A	ENST00000264709	frameshift_variant	ttt/tttC|p.Glu756fs/c.2265_2266insC	2947	59	2957	0.0199527	0	0	0	0	1	0	0	0	1	NO	NO	NO	NO	O	NO	NO	NO	NO	NO	NO	NA	NA	28.04	NA	1954	0	1955	0	993	59	1002	0.0588822	4.23233e-28	14	33	Artifact (12)
IT_16	2	25463227	C	CG	DNMT3A	ENST00000264709	frameshift_variant	ttt/tttC|p.Glu756fs/c.2265_2266insC	2231	58	2234	0.0259624	0	0	0	0	1	0	0	0	1	NO	NO	NO	NO	O	NO	NO	NO	NO	NO	NO	NA	NA	28.16	NA	1555	0	1556	0	676	58	678	0.0855457	4.59792e-30	14	33	Artifact (10)
IT_19	2	25463227	C	CG	DNMT3A	ENST00000264709	frameshift_variant	ttt/tttC|p.Glu756fs/c.2265_2266insC	1781	69	1785	0.0386555	0	0	0	0	1	0	0	0	1	NO	NO	NO	NO	O	NO	NO	NO	NO	NO	NO	NA	NA	30.6	NA	1262	0	1263	0	519	69	522	0.132184	2.54446e-36	14	33	Artifact (10)
IT_20	2	25463227	C	CG	DNMT3A	ENST00000264709	frameshift_variant	ttt/tttC|p.Glu756fs/c.2265_2266insC	475	25	476	0.052521	0	0	0	0	1	0	0	0	1	NO	NO	NO	NO	O	NO	NO	NO	NO	NO	NO	NA	NA	29.9	NA	295	0	295	0	180	25	181	0.138122	8.3567e-11	14	33	Artifact (9)
IT_21	2	25463227	C	CG	DNMT3A	ENST00000264709	frameshift_variant	ttt/tttC|p.Glu756fs/c.2265_2266insC	1289	21	1290	0.0162791	0	0	0	0	1	0	0	0	1	NO	NO	NO	NO	O	NO	NO	NO	NO	NO	NO	NA	NA	30.45	NA	818	0	818	0	471	21	472	0.0444915	8.92394e-10	14	33	Artifact (12)
IT_23	2	25463227	CA	C	DNMT3A	ENST00000264709	frameshift_variant	ttt/|p.Phe755fs/c.2264delT	2095	31	2135	0.0145199	0	0	0	0	1	0	0	0	1	NO	NO	NO	NO	O	NO	NO	NO	1.647e-05	NO	NO	NA	NA	26.36	NA	1286	3	1291	0.00232378	809	28	844	0.0331754	3.88999e-09	16	33	Artifact (10)
IT_24	2	25463227	CA	C	DNMT3A	ENST00000264709	frameshift_variant	ttt/|p.Phe755fs/c.2264delT	701	33	741	0.0445344	0	0	0	0	1	0	0	0	1	NO	NO	NO	NO	O	NO	NO	NO	1.647e-05	NO	NO	NA	NA	26.17	NA	461	1	465	0.00215054	240	32	276	0.115942	1.04924e-13	16	33	Artifact (8)
IT_01	2	25463227	CA	C	DNMT3A	ENST00000264709	frameshift_variant	ttt/|p.Phe755fs/c.2264delT	1346	57	1404	0.0405983	0	0	0	0	1	0	0	0	1	NO	NO	NO	NO	O	NO	NO	NO	1.647e-05	NO	NO	NA	NA	26.7	NA	851	0	851	0	495	57	553	0.103074	1.28289e-24	16	33	Artifact (8)
IT_02	2	25463227	CA	C	DNMT3A	ENST00000264709	frameshift_variant	ttt/|p.Phe755fs/c.2264delT	600	20	622	0.0321543	0	0	0	0	1	0	0	0	1	NO	NO	NO	NO	O	NO	NO	NO	1.647e-05	NO	NO	NA	NA	26.81	NA	361	0	361	0	239	20	261	0.0766284	1.68176e-08	16	33	Artifact (8)
IT_07	2	25463227	CA	C	DNMT3A	ENST00000264709	frameshift_variant	ttt/|p.Phe755fs/c.2264delT	1795	33	1837	0.0179641	0	0	0	0	1	0	0	0	1	NO	NO	NO	NO	O	NO	NO	NO	1.647e-05	NO	NO	NA	NA	26.96	NA	1166	2	1171	0.00170794	629	31	666	0.0465465	2.80415e-12	16	33	Artifact (10)
IT_08	2	25463227	CA	C	DNMT3A	ENST00000264709	frameshift_variant	ttt/|p.Phe755fs/c.2264delT	1520	27	1560	0.0173077	0	0	0	0	1	0	0	0	1	NO	NO	NO	NO	O	NO	NO	NO	1.647e-05	NO	NO	NA	NA	25.97	NA	950	2	955	0.00209424	570	25	605	0.0413223	4.42459e-09	16	33	Artifact (10)
IT_09	2	25463227	CA	C	DNMT3A	ENST00000264709	frameshift_variant	ttt/|p.Phe755fs/c.2264delT	1802	36	1855	0.019407	0	0	0	0	1	0	0	0	1	NO	NO	NO	NO	O	NO	NO	NO	1.647e-05	NO	NO	NA	NA	26.46	NA	1137	3	1144	0.00262238	665	33	711	0.0464135	1.55848e-11	16	33	Artifact (10)
IT_10	2	25463227	CA	C	DNMT3A	ENST00000264709	frameshift_variant	ttt/|p.Phe755fs/c.2264delT	1880	31	1921	0.0161374	0	0	0	0	1	0	0	0	1	NO	NO	NO	NO	O	NO	NO	NO	1.647e-05	NO	NO	NA	NA	26.19	NA	1175	4	1184	0.00337838	705	27	737	0.036635	2.17626e-08	16	33	Artifact (10)
IT_13	2	25463227	CA	C	DNMT3A	ENST00000264709	frameshift_variant	ttt/|p.Phe755fs/c.2264delT	835	21	857	0.0245041	0	0	0	0	1	0	0	0	1	NO	NO	NO	NO	O	NO	NO	NO	1.647e-05	NO	NO	NA	NA	27.06	NA	462	0	463	0	373	21	394	0.0532995	6.24134e-08	16	33	Artifact (8)
IT_14	2	25463227	CA	C	DNMT3A	ENST00000264709	frameshift_variant	ttt/|p.Phe755fs/c.2264delT	1046	25	1075	0.0232558	0	0	0	0	1	0	0	0	1	NO	NO	NO	NO	O	NO	NO	NO	1.647e-05	NO	NO	NA	NA	26.43	NA	621	0	622	0	425	25	453	0.0551876	2.58961e-10	16	33	Artifact (8)
IT_15	2	25463227	CA	C	DNMT3A	ENST00000264709	frameshift_variant	ttt/|p.Phe755fs/c.2264delT	2878	62	2961	0.0209389	0	0	0	0	1	1	0	0	2	NO	NO	NO	NO	O	NO	NO	NO	1.647e-05	NO	NO	NA	NA	25.99	NA	1944	7	1954	0.0035824	934	55	1007	0.0546177	1.1499e-19	16	33	Artifact (7)
IT_16	2	25463227	CA	C	DNMT3A	ENST00000264709	frameshift_variant	ttt/|p.Phe755fs/c.2264delT	2161	69	2242	0.0307761	0	0	0	0	1	1	0	0	2	NO	NO	NO	NO	O	NO	NO	NO	1.647e-05	NO	NO	NA	NA	26.63	NA	1550	3	1554	0.0019305	611	66	688	0.0959302	1.33174e-31	16	33	Artifact (7)
IT_05	2	25463227	CA	C	DNMT3A	ENST00000264709	frameshift_variant	ttt/|p.Phe755fs/c.2264delT	1712	50	1771	0.0282326	0	0	0	0	1	0	0	0	1	NO	NO	NO	NO	O	NO	NO	NO	1.647e-05	NO	NO	NA	NA	26.37	NA	1113	4	1118	0.00357782	599	46	653	0.0704441	1.26657e-16	16	33	Artifact (8)
IT_06	2	25463227	CA	C	DNMT3A	ENST00000264709	frameshift_variant	ttt/|p.Phe755fs/c.2264delT	1198	45	1246	0.0361156	0	0	0	0	1	0	0	0	1	NO	NO	NO	NO	O	NO	NO	NO	1.647e-05	NO	NO	NA	NA	26.26	NA	786	4	792	0.00505051	412	41	454	0.0903084	9.34388e-15	16	33	Artifact (8)
IT_10	2	25463239	A	AC	DNMT3A	ENST00000264709	frameshift_variant	ttc/ttcG|p.Phe752fs/c.2253_2254insG	1545	34	1548	0.0219638	0	0	0	0	1	0	0	0	1	NO	NO	NO	NA	NA	NO	NO	NO	NO	NO	NO	NA	NA	25.44	NA	984	0	985	0	561	34	563	0.0603908	2.12129e-15	13	13	Artifact (9)
IT_12	2	25463239	A	AC	DNMT3A	ENST00000264709	frameshift_variant	ttc/ttcG|p.Phe752fs/c.2253_2254insG	1521	22	1521	0.0144642	0	0	0	0	1	0	0	0	1	NO	NO	NO	NA	NA	NO	NO	NO	NO	NO	NO	NA	NA	27.46	NA	897	0	897	0	624	22	624	0.0352564	3.88452e-09	13	13	Artifact (11)
IT_16	2	25463239	A	AC	DNMT3A	ENST00000264709	frameshift_variant	ttc/ttcG|p.Phe752fs/c.2253_2254insG	2258	31	2265	0.0136865	0	0	0	0	1	0	0	0	1	NO	NO	NO	NA	NA	NO	NO	NO	NO	NO	NO	NA	NA	26.48	NA	1530	0	1534	0	728	31	731	0.0424077	9.06542e-16	13	13	Artifact (11)
IT_17	2	25463239	A	AC	DNMT3A	ENST00000264709	frameshift_variant	ttc/ttcG|p.Phe752fs/c.2253_2254insG	682	33	682	0.0483871	0	0	0	0	1	0	0	0	1	NO	NO	NO	NA	NA	NO	NO	NO	NO	NO	NO	NA	NA	26.18	NA	469	0	469	0	213	33	213	0.15493	1.14367e-16	13	13	Artifact (9)
IT_19	2	25463239	A	AC	DNMT3A	ENST00000264709	frameshift_variant	ttc/ttcG|p.Phe752fs/c.2253_2254insG	1715	50	1716	0.0291375	0	0	0	0	1	0	0	0	1	NO	NO	NO	NA	NA	NO	NO	NO	NO	NO	NO	NA	NA	27.42	NA	1203	0	1204	0	512	50	512	0.0976562	3.00703e-26	13	13	Artifact (9)
IT_09	2	25463242	A	AG	DNMT3A	ENST00000264709	frameshift_variant	ccc/cCcc|p.Phe751fs/c.2248dupC	1549	34	1551	0.0219213	0	0	0	0	1	0	0	0	1	NO	NO	NO	NA	NA	NO	NO	NO	NO	NO	NO	NA	NA	23.99	NA	989	4	991	0.00403633	560	30	560	0.0535714	7.18147e-10	8	31	Artifact (7)
IT_10	2	25463242	A	AG	DNMT3A	ENST00000264709	frameshift_variant	ccc/cCcc|p.Phe751fs/c.2248dupC	1565	30	1569	0.0191205	0	0	0	0	1	0	0	0	1	NO	NO	NO	NA	NA	NO	NO	NO	NO	NO	NO	NA	NA	24.08	NA	981	5	983	0.00508647	584	25	586	0.0426621	4.02639e-07	8	31	Artifact (9)
IT_16	2	25463242	A	AG	DNMT3A	ENST00000264709	frameshift_variant	ccc/cCcc|p.Phe751fs/c.2248dupC	2291	24	2295	0.0104575	0	0	0	0	1	0	0	0	1	NO	NO	NO	NA	NA	NO	NO	NO	NO	NO	NO	NA	NA	24.6	NA	1532	6	1532	0.00391645	759	18	763	0.0235911	3.64477e-05	8	31	Artifact (9)
IT_23	2	25463242	AG	A	DNMT3A	ENST00000264709	frameshift_variant	ccc/|p.Phe751fs/c.2249delC	1819	27	1847	0.0146183	0	0	0	0	1	0	0	0	1	NO	NO	NO	NA	NA	NO	NO	NO	NO	NO	NO	NA	NA	22.59	NA	1117	14	1131	0.0123784	702	13	716	0.0181564	0.325027	23	31	Artifact (11)
IT_24	2	25463242	AG	A	DNMT3A	ENST00000264709	frameshift_variant	ccc/|p.Phe751fs/c.2249delC	612	41	655	0.0625954	0	0	0	0	1	1	0	0	2	NO	NO	NO	NA	NA	NO	NO	NO	NO	NO	NO	NA	NA	24.77	NA	420	6	426	0.0140845	192	35	229	0.152838	7.13448e-12	23	31	Artifact (8)
IT_01	2	25463242	AG	A	DNMT3A	ENST00000264709	frameshift_variant	ccc/|p.Phe751fs/c.2249delC	984	20	1004	0.0199203	0	0	0	0	1	0	0	0	1	NO	NO	NO	NA	NA	NO	NO	NO	NO	NO	NO	NA	NA	23.63	NA	633	10	643	0.0155521	351	10	361	0.0277008	0.238575	23	31	Artifact (11)
IT_07	2	25463242	AG	A	DNMT3A	ENST00000264709	frameshift_variant	ccc/|p.Phe751fs/c.2249delC	1555	33	1591	0.0207417	0	0	0	0	1	0	0	0	1	NO	NO	NO	NA	NA	NO	NO	NO	NO	NO	NO	NA	NA	23.31	NA	1039	18	1059	0.0169972	516	15	532	0.0281955	0.140634	23	31	Artifact (9)
IT_09	2	25463242	AG	A	DNMT3A	ENST00000264709	frameshift_variant	ccc/|p.Phe751fs/c.2249delC	1522	29	1554	0.0186615	0	0	0	0	1	0	0	0	1	NO	NO	NO	NA	NA	NO	NO	NO	NO	NO	NO	NA	NA	22.86	NA	964	24	990	0.0242424	558	5	564	0.00886525	0.0321343	23	31	Artifact (11)
IT_10	2	25463242	AG	A	DNMT3A	ENST00000264709	frameshift_variant	ccc/|p.Phe751fs/c.2249delC	1547	29	1580	0.0183544	0	0	0	0	1	0	0	0	1	NO	NO	NO	NA	NA	NO	NO	NO	NO	NO	NO	NA	NA	22.79	NA	961	19	983	0.0193286	586	10	597	0.0167504	0.84734	23	31	Artifact (11)
IT_12	2	25463242	AG	A	DNMT3A	ENST00000264709	frameshift_variant	ccc/|p.Phe751fs/c.2249delC	1510	28	1541	0.01817	0	0	0	0	1	0	0	0	1	NO	NO	NO	NA	NA	NO	NO	NO	NO	NO	NO	NA	NA	22.63	NA	885	11	896	0.0122768	625	17	645	0.0263566	0.0518774	23	31	Artifact (11)
IT_13	2	25463242	AG	A	DNMT3A	ENST00000264709	frameshift_variant	ccc/|p.Phe751fs/c.2249delC	485	25	510	0.0490196	0	0	0	0	1	0	0	0	1	NO	NO	NO	NA	NA	NO	NO	NO	NO	NO	NO	NA	NA	24.01	NA	299	5	304	0.0164474	186	20	206	0.0970874	7.30984e-05	23	31	Artifact (10)
IT_14	2	25463242	AG	A	DNMT3A	ENST00000264709	frameshift_variant	ccc/|p.Phe751fs/c.2249delC	777	32	812	0.0394089	0	0	0	0	1	0	0	0	1	NO	NO	NO	NA	NA	NO	NO	NO	NO	NO	NO	NA	NA	24.14	NA	477	2	479	0.00417537	300	30	333	0.0900901	1.79195e-10	23	31	Artifact (10)
IT_15	2	25463242	AG	A	DNMT3A	ENST00000264709	frameshift_variant	ccc/|p.Phe751fs/c.2249delC	2643	115	2764	0.0416064	0	0	0	0	1	0	0	0	1	NO	NO	NO	NA	NA	NO	NO	NO	NO	NO	NO	NA	NA	24.13	NA	1775	35	1810	0.019337	868	80	954	0.0838574	6.31911e-15	23	31	Artifact (9)
IT_16	2	25463242	AG	A	DNMT3A	ENST00000264709	frameshift_variant	ccc/|p.Phe751fs/c.2249delC	2206	95	2306	0.0411969	0	0	0	0	1	0	0	0	1	NO	NO	NO	NA	NA	NO	NO	NO	NO	NO	NO	NA	NA	24.71	NA	1502	28	1532	0.0182768	704	67	774	0.0865633	6.27249e-14	23	31	Artifact (9)
IT_05	2	25463242	AG	A	DNMT3A	ENST00000264709	frameshift_variant	ccc/|p.Phe751fs/c.2249delC	1669	35	1706	0.0205158	0	0	0	0	1	0	0	0	1	NO	NO	NO	NA	NA	NO	NO	NO	NO	NO	NO	NA	NA	23.24	NA	1075	18	1093	0.0164684	594	17	613	0.0277325	0.152891	23	31	Artifact (9)
IT_17	2	25463242	AG	A	DNMT3A	ENST00000264709	frameshift_variant	ccc/|p.Phe751fs/c.2249delC	682	28	714	0.0392157	0	0	0	0	1	0	0	0	1	NO	NO	NO	NA	NA	NO	NO	NO	NO	NO	NO	NA	NA	22.75	NA	454	13	468	0.0277778	228	15	246	0.0609756	0.0402059	23	31	Artifact (9)
IT_19	2	25463242	AG	A	DNMT3A	ENST00000264709	frameshift_variant	ccc/|p.Phe751fs/c.2249delC	1711	36	1750	0.0205714	0	0	0	0	1	0	0	1	2	NO	NO	NO	NA	NA	NO	NO	NO	NO	NO	NO	NA	NA	23.45	NA	1185	16	1202	0.0133111	526	20	548	0.0364964	0.00297406	23	31	Artifact (8)
IT_21	2	25463242	AG	A	DNMT3A	ENST00000264709	frameshift_variant	ccc/|p.Phe751fs/c.2249delC	1132	52	1185	0.0438819	0	0	0	0	1	0	0	0	1	NO	NO	NO	NA	NA	NO	NO	NO	NO	NO	NO	NA	NA	23.56	NA	731	9	740	0.0121622	401	43	445	0.0966292	1.05253e-11	23	31	Artifact (10)
IT_22	2	25463242	AG	A	DNMT3A	ENST00000264709	frameshift_variant	ccc/|p.Phe751fs/c.2249delC	1253	62	1318	0.047041	0	0	0	0	1	0	0	0	1	NO	NO	NO	NA	NA	NO	NO	NO	NO	NO	NO	NA	NA	23.77	NA	845	9	855	0.0105263	408	53	463	0.114471	6.23322e-17	23	31	Artifact (10)
IT_10	2	25463246	G	GT	DNMT3A	ENST00000264709	frameshift_variant	cgc/cgAc|p.Phe751fs/c.2246_2247insA	1570	27	1580	0.0170886	0	0	0	0	1	0	0	0	1	NO	NO	NO	NA	NA	NO	NO	NO	NO	NO	NO	NA	NA	20.62	NA	980	0	981	0	590	27	599	0.0450751	4.94054e-12	5	5	Artifact (8)
IT_19	2	25463246	G	GT	DNMT3A	ENST00000264709	frameshift_variant	cgc/cgAc|p.Phe751fs/c.2246_2247insA	1745	36	1751	0.0205597	0	0	0	0	1	0	0	0	1	NO	NO	NO	NA	NA	NO	NO	NO	NO	NO	NO	NA	NA	20.43	NA	1200	0	1201	0	545	36	550	0.0654545	1.44637e-18	5	5	Artifact (6)
IT_23	2	25463249	A	AG	DNMT3A	ENST00000264709	frameshift_variant	gat/gaCt|p.Arg749fs/c.2243_2244insC	1849	272	1851	0.146948	1	0	0	0	1	1	0	0	3	NO	NO	NO	NO	O	NO	NO	NO	NO	NO	NO	NA	NA	28.88	NA	1128	2	1129	0.00177148	721	270	722	0.373961	1.24002e-95	32	32	Artifact (6)
IT_01	2	25463249	A	AG	DNMT3A	ENST00000264709	frameshift_variant	gat/gaCt|p.Arg749fs/c.2243_2244insC	1005	75	1010	0.0742574	0	1	0	0	1	1	0	0	3	NO	NO	NO	NO	O	NO	NO	NO	NO	NO	NO	NA	NA	29.49	NA	640	0	643	0	365	75	367	0.20436	9.69293e-32	32	32	Artifact (7)
IT_02	2	25463249	A	AG	DNMT3A	ENST00000264709	frameshift_variant	gat/gaCt|p.Arg749fs/c.2243_2244insC	530	40	531	0.0753296	0	1	0	0	1	1	0	0	3	NO	NO	NO	NO	O	NO	NO	NO	NO	NO	NO	NA	NA	29.46	NA	322	0	322	0	208	40	209	0.191388	5.09047e-16	32	32	Artifact (7)
IT_03	2	25463249	A	AG	DNMT3A	ENST00000264709	frameshift_variant	gat/gaCt|p.Arg749fs/c.2243_2244insC	219	40	219	0.182648	1	1	0	0	1	1	0	0	4	NO	NO	NO	NO	O	NO	NO	NO	NO	NO	NO	NA	NA	28.48	NA	126	0	126	0	93	40	93	0.430108	9.75027e-14	32	32	Artifact (5)
IT_04	2	25463249	A	AG	DNMT3A	ENST00000264709	frameshift_variant	gat/gaCt|p.Arg749fs/c.2243_2244insC	248	27	248	0.108871	0	1	0	0	1	1	0	0	3	NO	NO	NO	NO	O	NO	NO	NO	NO	NO	NO	NA	NA	29.46	NA	147	0	147	0	101	27	101	0.267327	2.10323e-10	32	32	Artifact (6)
IT_07	2	25463249	A	AG	DNMT3A	ENST00000264709	frameshift_variant	gat/gaCt|p.Arg749fs/c.2243_2244insC	1585	170	1590	0.106918	0	0	0	0	1	1	0	0	2	NO	NO	NO	NO	O	NO	NO	NO	NO	NO	NO	NA	NA	30.31	NA	1058	0	1059	0	527	170	531	0.320151	5.21994e-75	32	32	Artifact (6)
IT_08	2	25463249	A	AG	DNMT3A	ENST00000264709	frameshift_variant	gat/gaCt|p.Arg749fs/c.2243_2244insC	1327	183	1329	0.137698	1	1	0	0	1	1	0	0	4	NO	NO	NO	NO	O	NO	NO	NO	NO	NO	NO	NA	NA	29.54	NA	836	1	836	0.00119617	491	182	493	0.369168	2.44854e-69	32	32	Artifact (5)
IT_09	2	25463249	A	AG	DNMT3A	ENST00000264709	frameshift_variant	gat/gaCt|p.Arg749fs/c.2243_2244insC	1552	108	1556	0.0694087	0	0	0	0	1	1	0	0	2	NO	NO	NO	NO	O	NO	NO	NO	NO	NO	NO	NA	NA	29.91	NA	988	5	989	0.00505561	564	103	567	0.181658	1.22416e-36	32	32	Artifact (7)
IT_10	2	25463249	A	AG	DNMT3A	ENST00000264709	frameshift_variant	gat/gaCt|p.Arg749fs/c.2243_2244insC	1581	205	1583	0.129501	1	1	0	0	1	1	0	0	4	NO	NO	NO	NO	O	NO	NO	NO	NO	NO	NO	NA	NA	29.19	NA	979	3	980	0.00306122	602	202	603	0.334992	4.25298e-72	32	32	Artifact (5)
IT_11	2	25463249	A	AG	DNMT3A	ENST00000264709	frameshift_variant	gat/gaCt|p.Arg749fs/c.2243_2244insC	608	73	609	0.119869	1	1	0	0	1	1	0	0	4	NO	NO	NO	NO	O	NO	NO	NO	NO	NO	NO	NA	NA	29.4	NA	374	1	374	0.0026738	234	72	235	0.306383	2.4176e-26	32	32	Artifact (5)
IT_12	2	25463249	A	AG	DNMT3A	ENST00000264709	frameshift_variant	gat/gaCt|p.Arg749fs/c.2243_2244insC	1534	354	1539	0.230019	1	1	0	0	1	1	0	0	4	NO	NO	NO	NO	O	NO	NO	NO	NO	NO	NO	NA	NA	28.55	NA	892	0	894	0	642	354	645	0.548837	7.16886e-115	32	32	Artifact (5)
IT_13	2	25463249	A	AG	DNMT3A	ENST00000264709	frameshift_variant	gat/gaCt|p.Arg749fs/c.2243_2244insC	513	22	514	0.0428016	0	0	0	0	1	0	0	0	1	NO	NO	NO	NO	O	NO	NO	NO	NO	NO	NO	NA	NA	30.54	NA	303	1	304	0.00328947	210	21	210	0.1	1.7133e-07	32	32	Artifact (9)
IT_14	2	25463249	A	AG	DNMT3A	ENST00000264709	frameshift_variant	gat/gaCt|p.Arg749fs/c.2243_2244insC	817	43	817	0.0526316	0	0	0	0	1	0	0	0	1	NO	NO	NO	NO	O	NO	NO	NO	NO	NO	NO	NA	NA	29.94	NA	479	1	479	0.00208768	338	42	338	0.12426	8.53136e-15	32	32	Artifact (8)
IT_15	2	25463249	A	AG	DNMT3A	ENST00000264709	frameshift_variant	gat/gaCt|p.Arg749fs/c.2243_2244insC	2775	159	2781	0.0571737	0	0	0	0	1	1	0	0	2	NO	NO	NO	NO	O	NO	NO	NO	NO	NO	NO	NA	NA	28.66	NA	1805	1	1807	0.000553403	970	158	974	0.162218	1.89431e-67	32	32	Artifact (7)
IT_16	2	25463249	A	AG	DNMT3A	ENST00000264709	frameshift_variant	gat/gaCt|p.Arg749fs/c.2243_2244insC	2318	147	2324	0.063253	0	0	0	0	1	1	0	0	2	NO	NO	NO	NO	O	NO	NO	NO	NO	NO	NO	NA	NA	28.54	NA	1529	3	1530	0.00196078	789	144	794	0.18136	1.62337e-59	32	32	Artifact (7)
IT_05	2	25463249	A	AG	DNMT3A	ENST00000264709	frameshift_variant	gat/gaCt|p.Arg749fs/c.2243_2244insC	1707	80	1708	0.0468384	0	0	0	0	1	0	0	0	1	NO	NO	NO	NO	O	NO	NO	NO	NO	NO	NO	NA	NA	30.4	NA	1091	0	1091	0	616	80	617	0.12966	9.2666e-35	32	32	Artifact (9)
IT_06	2	25463249	A	AG	DNMT3A	ENST00000264709	frameshift_variant	gat/gaCt|p.Arg749fs/c.2243_2244insC	1168	65	1170	0.0555556	0	0	0	0	1	1	0	0	2	NO	NO	NO	NO	O	NO	NO	NO	NO	NO	NO	NA	NA	30.3	NA	744	0	744	0	424	65	426	0.152582	5.05682e-28	32	32	Artifact (7)
IT_17	2	25463249	A	AG	DNMT3A	ENST00000264709	frameshift_variant	gat/gaCt|p.Arg749fs/c.2243_2244insC	714	91	714	0.127451	0	1	0	0	1	1	0	0	3	NO	NO	NO	NO	O	NO	NO	NO	NO	NO	NO	NA	NA	29.3	NA	465	1	465	0.00215054	249	90	249	0.361446	3.66507e-36	32	32	Artifact (6)
IT_18	2	25463249	A	AG	DNMT3A	ENST00000264709	frameshift_variant	gat/gaCt|p.Arg749fs/c.2243_2244insC	362	40	364	0.10989	1	1	0	0	1	1	0	0	4	NO	NO	NO	NO	O	NO	NO	NO	NO	NO	NO	NA	NA	29.9	NA	268	0	268	0	94	40	96	0.416667	9.24227e-22	32	32	Artifact (5)
IT_19	2	25463249	A	AG	DNMT3A	ENST00000264709	frameshift_variant	gat/gaCt|p.Arg749fs/c.2243_2244insC	1751	309	1752	0.17637	1	1	0	0	1	1	0	0	4	NO	NO	NO	NO	O	NO	NO	NO	NO	NO	NO	NA	NA	29.01	NA	1199	4	1199	0.00333611	552	305	553	0.551537	1.35462e-125	32	32	Artifact (5)
IT_20	2	25463249	A	AG	DNMT3A	ENST00000264709	frameshift_variant	gat/gaCt|p.Arg749fs/c.2243_2244insC	476	99	476	0.207983	1	1	0	0	1	1	0	0	4	NO	NO	NO	NO	O	NO	NO	NO	NO	NO	NO	NA	NA	27.98	NA	291	1	291	0.00343643	185	98	185	0.52973	1.65128e-33	32	32	Artifact (5)
IT_21	2	25463249	A	AG	DNMT3A	ENST00000264709	frameshift_variant	gat/gaCt|p.Arg749fs/c.2243_2244insC	1191	150	1196	0.125418	1	0	0	0	1	1	0	0	3	NO	NO	NO	NO	O	NO	NO	NO	NO	NO	NO	NA	NA	29.4	NA	738	1	740	0.00135135	453	149	456	0.326754	1.4135e-55	32	32	Artifact (6)
IT_22	2	25463249	A	AG	DNMT3A	ENST00000264709	frameshift_variant	gat/gaCt|p.Arg749fs/c.2243_2244insC	1317	149	1320	0.112879	1	0	0	0	1	1	0	0	3	NO	NO	NO	NO	O	NO	NO	NO	NO	NO	NO	NA	NA	29.9	NA	850	0	851	0	467	149	469	0.317697	6.16088e-62	32	32	Artifact (6)
IT_01	2	25463249	AT	AGTC	DNMT3A	ENST00000264709	frameshift_variant+missense_variant	gat/gGACt|p.Asp748fs/c.2243delAinsGAC	1003	20	1010	0.019802	0	0	0	0	1	0	0	0	1	NO	NO	NO	NO	O	NO	NO	NO	NO	NO	NO	NA	NA	29.155	ComplexIndel	NA	NA	NA	NA	NA	NA	NA	NA	NA	9	32	Artifact (8)
IT_07	2	25463249	AT	AGTC	DNMT3A	ENST00000264709	frameshift_variant+missense_variant	gat/gGACt|p.Asp748fs/c.2243delAinsGAC	1565	31	1590	0.0194969	0	0	0	0	1	0	0	0	1	NO	NO	NO	NO	O	NO	NO	NO	NO	NO	NO	NA	NA	30.2	ComplexIndel	NA	NA	NA	NA	NA	NA	NA	NA	NA	9	32	Artifact (8)
IT_08	2	25463249	AT	AGTC	DNMT3A	ENST00000264709	frameshift_variant+missense_variant	gat/gGACt|p.Asp748fs/c.2243delAinsGAC	1305	33	1329	0.0248307	0	0	0	0	1	0	0	0	1	NO	NO	NO	NO	O	NO	NO	NO	NO	NO	NO	NA	NA	29.34	ComplexIndel	NA	NA	NA	NA	NA	NA	NA	NA	NA	9	32	Artifact (6)
IT_10	2	25463249	AT	AGTC	DNMT3A	ENST00000264709	frameshift_variant+missense_variant	gat/gGACt|p.Asp748fs/c.2243delAinsGAC	1538	65	1583	0.0410613	0	0	0	0	1	0	0	0	1	NO	NO	NO	NO	O	NO	NO	NO	NO	NO	NO	NA	NA	28.995	ComplexIndel	NA	NA	NA	NA	NA	NA	NA	NA	NA	9	32	Artifact (6)
IT_12	2	25463249	AT	AGTC	DNMT3A	ENST00000264709	frameshift_variant+missense_variant	gat/gGACt|p.Asp748fs/c.2243delAinsGAC	1534	37	1539	0.0240416	0	0	0	0	1	0	0	0	1	NO	NO	NO	NO	O	NO	NO	NO	NO	NO	NO	NA	NA	28.515	ComplexIndel	NA	NA	NA	NA	NA	NA	NA	NA	NA	9	32	Artifact (6)
IT_09	2	25463259	T	TC	DNMT3A	ENST00000264709	frameshift_variant	aag/aaGg|p.Glu745fs/c.2231_2232insG	1614	26	1617	0.0160792	0	0	0	0	1	0	0	0	1	NO	NO	NO	NO	O	NO	NO	NO	NO	NO	NO	NA	NA	28.61	NA	984	9	986	0.00912779	630	17	631	0.0269414	0.00808559	20	20	Artifact (10)
IT_10	2	25463259	T	TC	DNMT3A	ENST00000264709	frameshift_variant	aag/aaGg|p.Glu745fs/c.2231_2232insG	1715	33	1717	0.0192196	0	0	0	0	1	0	0	0	1	NO	NO	NO	NO	O	NO	NO	NO	NO	NO	NO	NA	NA	28.6	NA	975	6	976	0.00614754	740	27	741	0.0364372	9.09528e-06	20	20	Artifact (11)
IT_15	2	25463259	T	TC	DNMT3A	ENST00000264709	frameshift_variant	aag/aaGg|p.Glu745fs/c.2231_2232insG	2952	33	2958	0.0111562	0	0	0	0	1	0	0	0	1	NO	NO	NO	NO	O	NO	NO	NO	NO	NO	NO	NA	NA	27.24	NA	1792	21	1796	0.0116927	1160	12	1162	0.010327	0.858242	20	20	Artifact (10)
IT_16	2	25463259	T	TC	DNMT3A	ENST00000264709	frameshift_variant	aag/aaGg|p.Glu745fs/c.2231_2232insG	2482	41	2486	0.0164924	0	0	0	0	1	0	0	0	1	NO	NO	NO	NO	O	NO	NO	NO	NO	NO	NO	NA	NA	27.3	NA	1526	17	1528	0.0111257	956	24	958	0.0250522	0.0143045	20	20	Artifact (10)
IT_06	2	25463259	T	TC	DNMT3A	ENST00000264709	frameshift_variant	aag/aaGg|p.Glu745fs/c.2231_2232insG	1226	22	1227	0.0179299	0	0	0	0	1	0	0	0	1	NO	NO	NO	NO	O	NO	NO	NO	NO	NO	NO	NA	NA	27.15	NA	738	8	738	0.0108401	488	14	489	0.0286299	0.0284233	20	20	Artifact (10)
IT_19	2	25463259	T	TC	DNMT3A	ENST00000264709	frameshift_variant	aag/aaGg|p.Glu745fs/c.2231_2232insG	1876	30	1877	0.015983	0	0	0	0	1	0	0	0	1	NO	NO	NO	NO	O	NO	NO	NO	NO	NO	NO	NA	NA	28.11	NA	1194	6	1194	0.00502513	682	24	683	0.0351391	2.40554e-06	20	20	Artifact (11)
IT_23	2	25463263	T	TG	DNMT3A	ENST00000264709	frameshift_variant	ccc/cCcc|p.Lys744fs/c.2227dupC	1894	36	1899	0.0189573	0	0	0	0	1	0	0	0	1	NO	NO	NO	NO	O	NO	NO	NO	NO	NO	NO	NA	NA	26.39	NA	1119	2	1122	0.00178253	775	34	777	0.043758	2.20163e-11	5	21	Artifact (9)
IT_08	2	25463263	T	TG	DNMT3A	ENST00000264709	frameshift_variant	ccc/cCcc|p.Lys744fs/c.2227dupC	1379	23	1381	0.0166546	0	0	0	0	1	0	0	0	1	NO	NO	NO	NO	O	NO	NO	NO	NO	NO	NO	NA	NA	26.32	NA	831	2	832	0.00240385	548	21	549	0.0382514	4.66173e-07	5	21	Artifact (9)
IT_24	2	25463263	TG	T	DNMT3A	ENST00000264709	frameshift_variant	ccc/|p.Lys744fs/c.2228delC	671	21	693	0.030303	0	0	0	0	1	0	0	0	1	NO	NO	NO	NO	O	NO	NO	NO	NO	NO	NO	NA	NA	25.54	NA	420	1	422	0.00236967	251	20	271	0.0738007	6.26424e-08	16	21	Artifact (10)
IT_10	2	25463263	TG	T	DNMT3A	ENST00000264709	frameshift_variant	ccc/|p.Lys744fs/c.2228delC	1696	21	1717	0.0122306	0	0	0	0	1	0	0	0	1	NO	NO	NO	NO	O	NO	NO	NO	NO	NO	NO	NA	NA	25.5	NA	973	1	974	0.00102669	723	20	743	0.0269179	5.71152e-07	16	21	Artifact (12)
IT_12	2	25463263	TG	T	DNMT3A	ENST00000264709	frameshift_variant	ccc/|p.Lys744fs/c.2228delC	1620	24	1646	0.0145808	0	0	0	0	1	0	0	0	1	NO	NO	NO	NO	O	NO	NO	NO	NO	NO	NO	NA	NA	27.59	NA	890	2	893	0.00223964	730	22	753	0.0292165	2.91239e-06	16	21	Artifact (12)
IT_14	2	25463263	TG	T	DNMT3A	ENST00000264709	frameshift_variant	ccc/|p.Lys744fs/c.2228delC	853	34	888	0.0382883	0	0	0	0	1	0	0	0	1	NO	NO	NO	NO	O	NO	NO	NO	NO	NO	NO	NA	NA	27	NA	477	0	478	0	376	34	410	0.0829268	1.8721e-12	16	21	Artifact (10)
IT_15	2	25463263	TG	T	DNMT3A	ENST00000264709	frameshift_variant	ccc/|p.Lys744fs/c.2228delC	2935	45	2984	0.0150804	0	0	0	0	1	0	0	0	1	NO	NO	NO	NO	O	NO	NO	NO	NO	NO	NO	NA	NA	25.7	NA	1779	6	1788	0.0033557	1156	39	1196	0.0326087	1.79508e-10	16	21	Artifact (12)
IT_16	2	25463263	TG	T	DNMT3A	ENST00000264709	frameshift_variant	ccc/|p.Lys744fs/c.2228delC	2470	26	2503	0.0103875	0	0	0	0	1	0	0	0	1	NO	NO	NO	NO	O	NO	NO	NO	NO	NO	NO	NA	NA	25.27	NA	1520	3	1526	0.00196592	950	23	977	0.0235415	2.17591e-07	16	21	Artifact (12)
IT_05	2	25463263	TG	T	DNMT3A	ENST00000264709	frameshift_variant	ccc/|p.Lys744fs/c.2228delC	1732	38	1772	0.0214447	0	0	0	0	1	0	0	0	1	NO	NO	NO	NO	O	NO	NO	NO	NO	NO	NO	NA	NA	26.67	NA	1083	1	1084	0.000922509	649	37	688	0.0537791	7.70932e-15	16	21	Artifact (10)
IT_17	2	25463263	TG	T	DNMT3A	ENST00000264709	frameshift_variant	ccc/|p.Lys744fs/c.2228delC	775	22	799	0.0275344	0	0	0	0	1	0	0	0	1	NO	NO	NO	NO	O	NO	NO	NO	NO	NO	NO	NA	NA	26.42	NA	459	2	462	0.004329	316	20	337	0.0593472	1.94836e-06	16	21	Artifact (10)
IT_21	2	25463263	TG	T	DNMT3A	ENST00000264709	frameshift_variant	ccc/|p.Lys744fs/c.2228delC	1244	33	1281	0.0257611	0	0	0	0	1	0	0	0	1	NO	NO	NO	NO	O	NO	NO	NO	NO	NO	NO	NA	NA	27.14	NA	734	0	736	0	510	33	545	0.0605505	3.12048e-13	16	21	Artifact (10)
IT_22	2	25463263	TG	T	DNMT3A	ENST00000264709	frameshift_variant	ccc/|p.Lys744fs/c.2228delC	1356	40	1398	0.0286123	0	0	0	0	1	0	0	0	1	NO	NO	NO	NO	O	NO	NO	NO	NO	NO	NO	NA	NA	27.22	NA	846	1	849	0.00117786	510	39	549	0.0710383	1.69408e-15	16	21	Artifact (10)
IT_06	2	25463278	G	GA	DNMT3A	ENST00000264709	frameshift_variant	ctg/ctgT|p.His739fs/c.2214_2215insT	1238	22	1241	0.0177276	0	0	0	0	1	0	0	0	1	NO	NO	NO	NO	O	NO	NO	NO	NO	NO	NO	NA	NA	28.69	NA	735	0	735	0	503	22	506	0.0434783	3.32412e-09	4	4	Artifact (8)
IT_15	2	25463283	AG	A	DNMT3A	ENST00000264709	frameshift_variant	cgc/|p.Leu737fs/c.2208delC	3024	36	3061	0.0117609	0	0	0	0	1	0	0	0	1	NO	NO	NO	NA	NA	NO	NO	NO	NO	NO	NO	NA	NA	25.53	NA	1719	36	1756	0.0205011	1305	0	1305	0	2.45813e-09	2	2	Artifact (6)
IT_07	2	25463286	C	CG	DNMT3A	ENST00000264709	frameshift_variant	tac/taCc|p.Arg736fs/c.2204_2205insC	1630	24	1634	0.0146879	0	0	0	0	1	0	0	0	1	NO	NO	NO	NA	NA	NO	NO	NO	NO	NO	NO	NA	NA	27.91	NA	1048	2	1051	0.00190295	582	22	583	0.0377358	2.2206e-08	16	17	Artifact (12)
IT_08	2	25463286	C	CG	DNMT3A	ENST00000264709	frameshift_variant	tac/taCc|p.Arg736fs/c.2204_2205insC	1380	32	1381	0.0231716	0	0	0	0	1	0	0	0	1	NO	NO	NO	NA	NA	NO	NO	NO	NO	NO	NO	NA	NA	27.44	NA	821	0	822	0	559	32	559	0.0572451	4.7715e-13	16	17	Artifact (10)
IT_09	2	25463286	C	CG	DNMT3A	ENST00000264709	frameshift_variant	tac/taCc|p.Arg736fs/c.2204_2205insC	1623	24	1626	0.0147601	0	0	0	0	1	0	0	0	1	NO	NO	NO	NA	NA	NO	NO	NO	NO	NO	NO	NA	NA	27.14	NA	979	4	980	0.00408163	644	20	646	0.0309598	2.11018e-05	16	17	Artifact (12)
IT_10	2	25463286	C	CG	DNMT3A	ENST00000264709	frameshift_variant	tac/taCc|p.Arg736fs/c.2204_2205insC	1729	41	1730	0.0236994	0	0	0	0	1	0	0	0	1	NO	NO	NO	NA	NA	NO	NO	NO	NO	NO	NO	NA	NA	26.82	NA	967	1	967	0.00103413	762	40	763	0.0524246	2.40021e-13	16	17	Artifact (10)
IT_12	2	25463286	C	CG	DNMT3A	ENST00000264709	frameshift_variant	tac/taCc|p.Arg736fs/c.2204_2205insC	1659	22	1661	0.013245	0	0	0	0	1	0	0	0	1	NO	NO	NO	NA	NA	NO	NO	NO	NO	NO	NO	NA	NA	27.94	NA	887	0	889	0	772	22	772	0.0284974	5.83433e-08	16	17	Artifact (12)
IT_15	2	25463286	C	CG	DNMT3A	ENST00000264709	frameshift_variant	tac/taCc|p.Arg736fs/c.2204_2205insC	3054	50	3058	0.0163506	0	0	0	0	1	0	0	0	1	NO	NO	NO	NA	NA	NO	NO	NO	NO	NO	NO	NA	NA	25.68	NA	1747	3	1749	0.00171527	1307	47	1309	0.0359053	2.83528e-14	16	17	Artifact (12)
IT_16	2	25463286	C	CG	DNMT3A	ENST00000264709	frameshift_variant	tac/taCc|p.Arg736fs/c.2204_2205insC	2566	42	2570	0.0163424	0	0	0	0	1	0	0	0	1	NO	NO	NO	NA	NA	NO	NO	NO	NO	NO	NO	NA	NA	25.8	NA	1495	2	1496	0.0013369	1071	40	1074	0.0372439	3.01659e-13	16	17	Artifact (12)
IT_05	2	25463286	C	CG	DNMT3A	ENST00000264709	frameshift_variant	tac/taCc|p.Arg736fs/c.2204_2205insC	1768	35	1769	0.0197852	0	0	0	0	1	0	0	0	1	NO	NO	NO	NA	NA	NO	NO	NO	NO	NO	NO	NA	NA	27.49	NA	1070	1	1071	0.000933707	698	34	698	0.0487106	6.63134e-13	16	17	Artifact (12)
IT_06	2	25463286	C	CG	DNMT3A	ENST00000264709	frameshift_variant	tac/taCc|p.Arg736fs/c.2204_2205insC	1248	30	1248	0.0240385	0	0	0	0	1	0	0	0	1	NO	NO	NO	NA	NA	NO	NO	NO	NO	NO	NO	NA	NA	26.91	NA	733	0	733	0	515	30	515	0.0582524	4.91898e-12	16	17	Artifact (10)
IT_06	2	25463311	C	CA	DNMT3A	ENST00000264709	frameshift_variant	act/acTt|p.Gly728fs/c.2180_2181insT	1251	24	1251	0.0191847	0	0	0	0	1	0	0	0	1	NO	NO	NO	NA	NA	NO	NO	NO	NO	NO	NO	NA	NA	22.95	NA	714	24	714	0.0336134	537	0	537	0	2.13596e-06	6	6	Artifact (8)
IT_23	2	25463315	GC	G	DNMT3A	ENST00000264709	frameshift_variant	ggc/|p.Gly726fs/c.2177delG	1144	770	1916	0.401879	1	1	1	0	1	1	0	0	5	NO	NO	NO	NO	O	NO	NO	NO	NO	NO	NO	NA	NA	27.19	NA	1083	9	1093	0.00823422	61	761	823	0.924666	0	24	24	Artifact (4)
IT_24	2	25463315	GC	G	DNMT3A	ENST00000264709	frameshift_variant	ggc/|p.Gly726fs/c.2177delG	418	247	666	0.370871	1	1	0	0	1	1	0	0	4	NO	NO	NO	NO	O	NO	NO	NO	NO	NO	NO	NA	NA	22.84	NA	337	17	354	0.0480226	81	230	312	0.737179	5.84674e-85	24	24	Artifact (4)
IT_01	2	25463315	GC	G	DNMT3A	ENST00000264709	frameshift_variant	ggc/|p.Gly726fs/c.2177delG	726	386	1113	0.34681	1	1	0	0	0	1	0	0	3	NO	NO	NO	NO	O	NO	NO	NO	NO	NO	NO	NA	NA	25.32	NA	618	7	625	0.0112	108	379	488	0.776639	1.58643e-184	24	24	Artifact (6)
IT_02	2	25463315	GC	G	DNMT3A	ENST00000264709	frameshift_variant	ggc/|p.Gly726fs/c.2177delG	377	196	573	0.342059	1	1	0	0	1	1	0	0	4	NO	NO	NO	NO	O	NO	NO	NO	NO	NO	NO	NA	NA	24.93	NA	310	2	312	0.00641026	67	194	261	0.743295	3.94442e-91	24	24	Artifact (5)
IT_03	2	25463315	GC	G	DNMT3A	ENST00000264709	frameshift_variant	ggc/|p.Gly726fs/c.2177delG	126	111	237	0.468354	1	1	1	0	1	1	1	0	6	NO	NO	NO	NO	O	NO	NO	NO	NO	NO	NO	NA	NA	28.26	NA	117	1	118	0.00847458	9	110	119	0.92437	1.72519e-55	24	24	Artifact (5)
IT_04	2	25463315	GC	G	DNMT3A	ENST00000264709	frameshift_variant	ggc/|p.Gly726fs/c.2177delG	150	126	276	0.456522	1	1	1	0	1	1	0	0	5	NO	NO	NO	NO	O	NO	NO	NO	NO	NO	NO	NA	NA	28.93	NA	141	1	142	0.00704225	9	125	134	0.932836	2.01464e-66	24	24	Artifact (4)
IT_07	2	25463315	GC	G	DNMT3A	ENST00000264709	frameshift_variant	ggc/|p.Gly726fs/c.2177delG	1079	548	1629	0.336403	1	1	1	0	1	1	0	0	5	NO	NO	NO	NO	O	NO	NO	NO	NO	NO	NO	NA	NA	27.25	NA	1013	4	1018	0.00392927	66	544	611	0.890344	0	24	24	Artifact (4)
IT_08	2	25463315	GC	G	DNMT3A	ENST00000264709	frameshift_variant	ggc/|p.Gly726fs/c.2177delG	855	525	1383	0.37961	1	1	1	0	1	1	0	0	5	NO	NO	NO	NO	O	NO	NO	NO	NO	NO	NO	NA	NA	27.56	NA	800	4	806	0.00496278	55	521	577	0.902946	0	24	24	Artifact (4)
IT_09	2	25463315	GC	G	DNMT3A	ENST00000264709	frameshift_variant	ggc/|p.Gly726fs/c.2177delG	1006	603	1613	0.373838	1	1	1	0	1	1	0	0	5	NO	NO	NO	NO	O	NO	NO	NO	NO	NO	NO	NA	NA	26.48	NA	921	10	933	0.0107181	85	593	680	0.872059	0	24	24	Artifact (3)
IT_10	2	25463315	GC	G	DNMT3A	ENST00000264709	frameshift_variant	ggc/|p.Gly726fs/c.2177delG	1013	717	1733	0.413733	1	1	1	0	1	1	0	0	5	NO	NO	NO	NO	O	NO	NO	NO	NO	NO	NO	NA	NA	26.16	NA	915	17	934	0.0182013	98	700	799	0.876095	0	24	24	Artifact (3)
IT_11	2	25463315	GC	G	DNMT3A	ENST00000264709	frameshift_variant	ggc/|p.Gly726fs/c.2177delG	382	232	615	0.377236	1	1	1	0	1	1	0	1	6	NO	NO	NO	NO	O	NO	NO	NO	NO	NO	NO	NA	NA	29.33	NA	359	3	362	0.00828729	23	229	253	0.905138	8.90945e-137	24	24	Artifact (5)
IT_12	2	25463315	GC	G	DNMT3A	ENST00000264709	frameshift_variant	ggc/|p.Gly726fs/c.2177delG	955	693	1653	0.419238	1	1	0	0	1	1	0	1	5	NO	NO	NO	NO	O	NO	NO	NO	NO	NO	NO	NA	NA	28.63	NA	847	10	860	0.0116279	108	683	793	0.861286	0	24	24	Artifact (3)
IT_13	2	25463315	GC	G	DNMT3A	ENST00000264709	frameshift_variant	ggc/|p.Gly726fs/c.2177delG	310	220	531	0.414313	1	1	0	0	1	1	0	0	4	NO	NO	NO	NO	O	NO	NO	NO	NO	NO	NO	NA	NA	26.21	NA	255	12	267	0.0449438	55	208	264	0.787879	9.01816e-78	24	24	Artifact (4)
IT_14	2	25463315	GC	G	DNMT3A	ENST00000264709	frameshift_variant	ggc/|p.Gly726fs/c.2177delG	513	376	890	0.422472	1	1	0	0	1	1	0	0	4	NO	NO	NO	NO	O	NO	NO	NO	NO	NO	NO	NA	NA	26.2	NA	412	22	434	0.0506912	101	354	456	0.776316	3.932e-122	24	24	Artifact (4)
IT_15	2	25463315	GC	G	DNMT3A	ENST00000264709	frameshift_variant	ggc/|p.Gly726fs/c.2177delG	1857	1174	3040	0.386184	1	1	0	0	1	1	0	0	4	NO	NO	NO	NO	O	NO	NO	NO	NO	NO	NO	NA	NA	25.92	NA	1576	34	1614	0.0210657	281	1140	1426	0.799439	0	24	24	Artifact (4)
IT_16	2	25463315	GC	G	DNMT3A	ENST00000264709	frameshift_variant	ggc/|p.Gly726fs/c.2177delG	1612	943	2556	0.368936	1	1	0	0	1	1	0	0	4	NO	NO	NO	NO	O	NO	NO	NO	NO	NO	NO	NA	NA	26.11	NA	1353	41	1395	0.0293907	259	902	1161	0.776916	0	24	24	Artifact (4)
IT_05	2	25463315	GC	G	DNMT3A	ENST00000264709	frameshift_variant	ggc/|p.Gly726fs/c.2177delG	1139	628	1767	0.355405	1	1	1	0	1	1	0	0	5	NO	NO	NO	NO	O	NO	NO	NO	NO	NO	NO	NA	NA	26.97	NA	1031	13	1044	0.0124521	108	615	723	0.850622	0	24	24	Artifact (3)
IT_06	2	25463315	GC	G	DNMT3A	ENST00000264709	frameshift_variant	ggc/|p.Gly726fs/c.2177delG	790	455	1246	0.365169	1	1	0	0	1	1	0	0	4	NO	NO	NO	NO	O	NO	NO	NO	NO	NO	NO	NA	NA	26.19	NA	699	8	707	0.0113154	91	447	539	0.829314	5.00725e-231	24	24	Artifact (5)
IT_17	2	25463315	GC	G	DNMT3A	ENST00000264709	frameshift_variant	ggc/|p.Gly726fs/c.2177delG	444	387	832	0.465144	1	1	1	0	1	1	0	1	6	NO	NO	NO	NO	O	NO	NO	NO	NO	NO	NO	NA	NA	26.98	NA	427	12	439	0.0273349	17	375	393	0.954198	3.94983e-196	24	24	Artifact (4)
IT_18	2	25463315	GC	G	DNMT3A	ENST00000264709	frameshift_variant	ggc/|p.Gly726fs/c.2177delG	241	165	406	0.406404	1	1	1	0	1	1	0	1	6	NO	NO	NO	NO	O	NO	NO	NO	NO	NO	NO	NA	NA	27.46	NA	238	10	248	0.0403226	3	155	158	0.981013	2.5064e-95	24	24	Artifact (4)
IT_19	2	25463315	GC	G	DNMT3A	ENST00000264709	frameshift_variant	ggc/|p.Gly726fs/c.2177delG	1174	743	1917	0.387585	1	1	1	0	1	1	0	1	6	NO	NO	NO	NO	O	NO	NO	NO	NO	NO	NO	NA	NA	29.93	NA	1137	19	1156	0.016436	37	724	761	0.95138	0	24	24	Artifact (4)
IT_20	2	25463315	GC	G	DNMT3A	ENST00000264709	frameshift_variant	ggc/|p.Gly726fs/c.2177delG	290	226	516	0.437984	1	1	1	0	1	1	0	1	6	NO	NO	NO	NO	O	NO	NO	NO	NO	NO	NO	NA	NA	29.58	NA	283	1	284	0.00352113	7	225	232	0.969828	1.31094e-137	24	24	Artifact (5)
IT_21	2	25463315	GC	G	DNMT3A	ENST00000264709	frameshift_variant	ggc/|p.Gly726fs/c.2177delG	752	551	1305	0.422222	1	1	1	0	1	1	0	0	5	NO	NO	NO	NO	O	NO	NO	NO	NO	NO	NO	NA	NA	30.03	NA	699	13	712	0.0182584	53	538	593	0.907251	4.24873e-281	24	24	Artifact (3)
IT_22	2	25463315	GC	G	DNMT3A	ENST00000264709	frameshift_variant	ggc/|p.Gly726fs/c.2177delG	861	550	1412	0.389518	1	1	1	0	1	1	0	1	6	NO	NO	NO	NO	O	NO	NO	NO	NO	NO	NO	NA	NA	30.15	NA	813	11	825	0.0133333	48	539	587	0.918228	0	24	24	Artifact (4)
IT_09	2	25463507	AC	A	DNMT3A	ENST00000264709	frameshift_variant	gag/|p.Glu725fs/c.2173delG	1584	26	1610	0.0161491	0	0	0	0	1	0	0	0	1	NO	NO	NO	NO	O	NO	NO	NO	NO	NO	NO	NA	NA	25.14	NA	749	4	753	0.00531208	835	22	857	0.0256709	0.00113538	19	19	Artifact (10)
IT_10	2	25463507	AC	A	DNMT3A	ENST00000264709	frameshift_variant	gag/|p.Glu725fs/c.2173delG	1541	23	1565	0.0146965	0	0	0	0	1	0	0	0	1	NO	NO	NO	NO	O	NO	NO	NO	NO	NO	NO	NA	NA	25.32	NA	773	10	784	0.0127551	768	13	781	0.0166453	0.537827	19	19	Artifact (10)
IT_11	2	25463507	AC	A	DNMT3A	ENST00000264709	frameshift_variant	gag/|p.Glu725fs/c.2173delG	2214	57	2277	0.0250329	0	0	0	0	1	0	0	0	1	NO	NO	NO	NO	O	NO	NO	NO	NO	NO	NO	NA	NA	23.93	NA	1023	5	1030	0.00485437	1191	52	1247	0.0417001	2.38746e-09	19	19	Artifact (9)
IT_12	2	25463507	AC	A	DNMT3A	ENST00000264709	frameshift_variant	gag/|p.Glu725fs/c.2173delG	2611	75	2689	0.0278914	0	0	0	0	1	0	0	0	1	NO	NO	NO	NO	O	NO	NO	NO	NO	NO	NO	NA	NA	23.43	NA	1140	10	1151	0.0086881	1471	65	1538	0.0422627	3.84474e-08	19	19	Artifact (8)
IT_13	2	25463507	AC	A	DNMT3A	ENST00000264709	frameshift_variant	gag/|p.Glu725fs/c.2173delG	979	20	1000	0.02	0	0	0	0	1	0	0	0	1	NO	NO	NO	NO	O	NO	NO	NO	NO	NO	NO	NA	NA	25.69	NA	434	0	435	0	545	20	565	0.0353982	1.09183e-05	19	19	Artifact (9)
IT_17	2	25463507	AC	A	DNMT3A	ENST00000264709	frameshift_variant	gag/|p.Glu725fs/c.2173delG	1093	39	1132	0.0344523	0	0	0	0	1	0	0	0	1	NO	NO	NO	NO	O	NO	NO	NO	NO	NO	NO	NA	NA	25.04	NA	514	5	519	0.00963391	579	34	613	0.0554649	1.16333e-05	19	19	Artifact (9)
IT_18	2	25463507	AC	A	DNMT3A	ENST00000264709	frameshift_variant	gag/|p.Glu725fs/c.2173delG	1278	48	1326	0.0361991	0	0	0	0	1	0	0	0	1	NO	NO	NO	NO	O	NO	NO	NO	NO	NO	NO	NA	NA	24.08	NA	490	3	493	0.00608519	788	45	833	0.0540216	8.94687e-07	19	19	Artifact (9)
IT_19	2	25463507	AC	A	DNMT3A	ENST00000264709	frameshift_variant	gag/|p.Glu725fs/c.2173delG	1370	21	1393	0.0150754	0	0	0	0	1	0	0	0	1	NO	NO	NO	NO	O	NO	NO	NO	NO	NO	NO	NA	NA	22.13	NA	370	2	373	0.00536193	1000	19	1020	0.0186275	0.0833998	19	19	Artifact (11)
IT_22	2	25463507	AC	A	DNMT3A	ENST00000264709	frameshift_variant	gag/|p.Glu725fs/c.2173delG	2154	62	2219	0.0279405	0	0	0	0	1	0	0	0	1	NO	NO	NO	NO	O	NO	NO	NO	NO	NO	NO	NA	NA	22.7	NA	793	8	802	0.00997506	1361	54	1417	0.0381087	4.48273e-05	19	19	Artifact (9)
IT_11	2	25463512	A	AC	DNMT3A	ENST00000264709	frameshift_variant	ctc/ctcG|p.Tyr724fs/c.2169_2170insG	2285	50	2288	0.0218531	0	0	0	0	1	0	0	0	1	NO	NO	NO	NO	O	NO	NO	NO	NO	NO	NO	NA	NA	28.96	NA	1028	0	1029	0	1257	50	1259	0.0397141	2.02316e-13	19	20	Artifact (10)
IT_12	2	25463512	A	AC	DNMT3A	ENST00000264709	frameshift_variant	ctc/ctcG|p.Tyr724fs/c.2169_2170insG	2690	54	2691	0.0200669	0	0	0	0	1	0	0	0	1	NO	NO	NO	NO	O	NO	NO	NO	NO	NO	NO	NA	NA	29.01	NA	1147	0	1148	0	1543	54	1543	0.0349968	1.74933e-13	19	20	Artifact (10)
IT_13	2	25463512	A	AC	DNMT3A	ENST00000264709	frameshift_variant	ctc/ctcG|p.Tyr724fs/c.2169_2170insG	1000	48	1001	0.047952	0	0	0	0	1	0	0	0	1	NO	NO	NO	NO	O	NO	NO	NO	NO	NO	NO	NA	NA	29.17	NA	435	0	435	0	565	48	566	0.0848057	4.6289e-12	19	20	Artifact (10)
IT_14	2	25463512	A	AC	DNMT3A	ENST00000264709	frameshift_variant	ctc/ctcG|p.Tyr724fs/c.2169_2170insG	825	37	826	0.0447942	0	0	0	0	1	0	0	0	1	NO	NO	NO	NO	O	NO	NO	NO	NO	NO	NO	NA	NA	29.24	NA	356	1	356	0.00280899	469	36	470	0.0765957	5.18573e-08	19	20	Artifact (10)
IT_17	2	25463512	A	AC	DNMT3A	ENST00000264709	frameshift_variant	ctc/ctcG|p.Tyr724fs/c.2169_2170insG	1134	35	1135	0.030837	0	0	0	0	1	0	0	0	1	NO	NO	NO	NO	O	NO	NO	NO	NO	NO	NO	NA	NA	29.42	NA	517	0	518	0	617	35	617	0.0567261	1.1116e-09	19	20	Artifact (10)
IT_18	2	25463512	A	AC	DNMT3A	ENST00000264709	frameshift_variant	ctc/ctcG|p.Tyr724fs/c.2169_2170insG	1329	49	1329	0.0368698	0	0	0	0	1	0	0	0	1	NO	NO	NO	NO	O	NO	NO	NO	NO	NO	NO	NA	NA	28.71	NA	488	0	488	0	841	49	841	0.058264	4.54207e-10	19	20	Artifact (10)
IT_19	2	25463512	A	AC	DNMT3A	ENST00000264709	frameshift_variant	ctc/ctcG|p.Tyr724fs/c.2169_2170insG	1394	32	1394	0.0229555	0	0	0	0	1	0	0	0	1	NO	NO	NO	NO	O	NO	NO	NO	NO	NO	NO	NA	NA	29.12	NA	371	0	371	0	1023	32	1023	0.0312805	0.000113466	19	20	Artifact (10)
IT_22	2	25463512	A	AC	DNMT3A	ENST00000264709	frameshift_variant	ctc/ctcG|p.Tyr724fs/c.2169_2170insG	2235	59	2235	0.0263982	0	0	0	0	1	0	0	0	1	NO	NO	NO	NO	O	NO	NO	NO	NO	NO	NO	NA	NA	28.57	NA	801	0	801	0	1434	59	1434	0.0411437	7.82245e-12	19	20	Artifact (10)
IT_23	2	25463516	GC	G	DNMT3A	ENST00000264709	frameshift_variant	ggc/|p.Gly722fs/c.2164delG	1512	52	1565	0.0332268	0	0	0	0	1	0	0	0	1	NO	NO	NO	NO	O	NO	NO	NO	NO	NO	NO	NA	NA	20.79	NA	612	3	615	0.00487805	900	49	950	0.0515789	4.56815e-08	23	23	Artifact (9)
IT_24	2	25463516	GC	G	DNMT3A	ENST00000264709	frameshift_variant	ggc/|p.Gly722fs/c.2164delG	407	47	455	0.103297	0	0	0	0	1	1	0	0	2	NO	NO	NO	NO	O	NO	NO	NO	NO	NO	NO	NA	NA	21.48	NA	221	31	252	0.123016	186	16	203	0.0788177	0.162641	23	23	Artifact (5)
IT_01	2	25463516	GC	G	DNMT3A	ENST00000264709	frameshift_variant	ggc/|p.Gly722fs/c.2164delG	1021	42	1066	0.0393996	0	0	0	0	1	0	0	0	1	NO	NO	NO	NO	O	NO	NO	NO	NO	NO	NO	NA	NA	21.66	NA	403	12	418	0.0287081	618	30	648	0.0462963	0.196504	23	23	Artifact (8)
IT_07	2	25463516	GC	G	DNMT3A	ENST00000264709	frameshift_variant	ggc/|p.Gly722fs/c.2164delG	1320	28	1348	0.0207715	0	0	0	0	1	0	0	0	1	NO	NO	NO	NO	O	NO	NO	NO	NO	NO	NO	NA	NA	21.23	NA	492	8	500	0.016	828	20	848	0.0235849	0.430928	23	23	Artifact (8)
IT_08	2	25463516	GC	G	DNMT3A	ENST00000264709	frameshift_variant	ggc/|p.Gly722fs/c.2164delG	1029	24	1056	0.0227273	0	0	0	0	1	0	0	0	1	NO	NO	NO	NO	O	NO	NO	NO	NO	NO	NO	NA	NA	21.17	NA	441	6	450	0.0133333	588	18	606	0.029703	0.0955493	23	23	Artifact (8)
IT_09	2	25463516	GC	G	DNMT3A	ENST00000264709	frameshift_variant	ggc/|p.Gly722fs/c.2164delG	1530	80	1615	0.0495356	0	0	0	0	1	0	0	0	1	NO	NO	NO	NO	O	NO	NO	NO	NO	NO	NO	NA	NA	21.9	NA	716	27	747	0.0361446	814	53	868	0.0610599	0.0282805	23	23	Artifact (8)
IT_10	2	25463516	GC	G	DNMT3A	ENST00000264709	frameshift_variant	ggc/|p.Gly722fs/c.2164delG	1499	64	1565	0.0408946	0	0	0	0	1	0	0	0	1	NO	NO	NO	NO	O	NO	NO	NO	NO	NO	NO	NA	NA	22.63	NA	764	15	779	0.0192555	735	49	786	0.062341	1.67262e-05	23	23	Artifact (8)
IT_11	2	25463516	GC	G	DNMT3A	ENST00000264709	frameshift_variant	ggc/|p.Gly722fs/c.2164delG	2198	97	2301	0.0421556	0	0	0	0	1	0	0	0	1	NO	NO	NO	NO	O	NO	NO	NO	NO	NO	NO	NA	NA	23.67	NA	1007	16	1027	0.0155794	1191	81	1274	0.0635793	3.61129e-09	23	23	Artifact (8)
IT_12	2	25463516	GC	G	DNMT3A	ENST00000264709	frameshift_variant	ggc/|p.Gly722fs/c.2164delG	2585	116	2703	0.0429153	0	0	0	0	1	0	0	0	1	NO	NO	NO	NO	O	NO	NO	NO	NO	NO	NO	NA	NA	23.27	NA	1131	14	1147	0.0122058	1454	102	1556	0.0655527	7.49109e-13	23	23	Artifact (8)
IT_13	2	25463516	GC	G	DNMT3A	ENST00000264709	frameshift_variant	ggc/|p.Gly722fs/c.2164delG	960	52	1015	0.0512315	0	0	0	0	1	0	0	0	1	NO	NO	NO	NO	O	NO	NO	NO	NO	NO	NO	NA	NA	23.15	NA	413	21	435	0.0482759	547	31	580	0.0534483	0.77448	23	23	Artifact (7)
IT_14	2	25463516	GC	G	DNMT3A	ENST00000264709	frameshift_variant	ggc/|p.Gly722fs/c.2164delG	791	35	832	0.0420673	0	0	0	0	1	0	0	0	1	NO	NO	NO	NO	O	NO	NO	NO	NO	NO	NO	NA	NA	23.44	NA	336	18	356	0.0505618	455	17	476	0.0357143	0.300996	23	23	Artifact (8)
IT_15	2	25463516	GC	G	DNMT3A	ENST00000264709	frameshift_variant	ggc/|p.Gly722fs/c.2164delG	756	32	789	0.0405577	0	0	0	0	1	0	0	0	1	NO	NO	NO	NO	O	NO	NO	NO	NO	NO	NO	NA	NA	21.53	NA	293	11	305	0.0360656	463	21	484	0.0433884	0.712511	23	23	Artifact (8)
IT_06	2	25463516	GC	G	DNMT3A	ENST00000264709	frameshift_variant	ggc/|p.Gly722fs/c.2164delG	1260	37	1298	0.0285054	0	0	0	0	1	0	0	0	1	NO	NO	NO	NO	O	NO	NO	NO	NO	NO	NO	NA	NA	22.57	NA	564	17	582	0.0292096	696	20	716	0.027933	1	23	23	Artifact (8)
IT_17	2	25463516	GC	G	DNMT3A	ENST00000264709	frameshift_variant	ggc/|p.Gly722fs/c.2164delG	1056	74	1134	0.0652557	0	0	0	0	1	1	0	0	2	NO	NO	NO	NO	O	NO	NO	NO	NO	NO	NO	NA	NA	22.79	NA	501	12	514	0.0233463	555	62	620	0.1	8.94265e-08	23	23	Artifact (6)
IT_18	2	25463516	GC	G	DNMT3A	ENST00000264709	frameshift_variant	ggc/|p.Gly722fs/c.2164delG	1244	94	1343	0.0699926	0	0	0	0	1	1	0	0	2	NO	NO	NO	NO	O	NO	NO	NO	NO	NO	NO	NA	NA	21.49	NA	475	9	485	0.0185567	769	85	858	0.0990676	2.37716e-09	23	23	Artifact (7)
IT_19	2	25463516	GC	G	DNMT3A	ENST00000264709	frameshift_variant	ggc/|p.Gly722fs/c.2164delG	1350	49	1400	0.035	0	0	0	0	1	0	0	0	1	NO	NO	NO	NO	O	NO	NO	NO	NO	NO	NO	NA	NA	20.85	NA	368	2	370	0.00540541	982	47	1030	0.0456311	5.363e-05	23	23	Artifact (9)
IT_21	2	25463516	GC	G	DNMT3A	ENST00000264709	frameshift_variant	ggc/|p.Gly722fs/c.2164delG	549	27	576	0.046875	0	0	0	0	1	0	0	0	1	NO	NO	NO	NO	O	NO	NO	NO	NO	NO	NO	NA	NA	22.3	NA	230	2	232	0.00862069	319	25	344	0.0726744	0.000178312	23	23	Artifact (9)
IT_22	2	25463516	GC	G	DNMT3A	ENST00000264709	frameshift_variant	ggc/|p.Gly722fs/c.2164delG	2101	137	2242	0.0611062	0	0	0	0	1	1	0	0	2	NO	NO	NO	NO	O	NO	NO	NO	NO	NO	NO	NA	NA	21.17	NA	784	11	799	0.0137672	1317	126	1443	0.0873181	2.36524e-14	23	23	Artifact (6)
IT_24	2	25463528	AG	A	DNMT3A	ENST00000264709	frameshift_variant	cct/|p.Pro718fs/c.2152delC	423	53	477	0.111111	0	0	0	0	1	1	0	0	2	NO	NO	NO	NO	O	NO	NO	NO	NO	NO	NO	NA	NA	22.89	NA	247	0	247	0	176	53	230	0.230435	4.21359e-19	20	20	Artifact (6)
IT_09	2	25463528	AG	A	DNMT3A	ENST00000264709	frameshift_variant	cct/|p.Pro718fs/c.2152delC	1613	26	1641	0.015844	0	0	0	0	1	0	0	0	1	NO	NO	NO	NO	O	NO	NO	NO	NO	NO	NO	NA	NA	24.47	NA	740	2	742	0.00269542	873	24	899	0.0266963	3.90251e-05	20	20	Artifact (11)
IT_10	2	25463528	AG	A	DNMT3A	ENST00000264709	frameshift_variant	cct/|p.Pro718fs/c.2152delC	1555	27	1583	0.0170562	0	0	0	0	1	0	0	0	1	NO	NO	NO	NO	O	NO	NO	NO	NO	NO	NO	NA	NA	24.82	NA	766	2	768	0.00260417	789	25	815	0.0306748	5.89384e-06	20	20	Artifact (11)
IT_11	2	25463528	AG	A	DNMT3A	ENST00000264709	frameshift_variant	cct/|p.Pro718fs/c.2152delC	2317	25	2342	0.0106746	0	0	0	0	1	0	0	0	1	NO	NO	NO	NO	O	NO	NO	NO	NO	NO	NO	NA	NA	26.1	NA	1023	1	1024	0.000976562	1294	24	1318	0.0182094	1.58798e-05	20	20	Artifact (11)
IT_12	2	25463528	AG	A	DNMT3A	ENST00000264709	frameshift_variant	cct/|p.Pro718fs/c.2152delC	2705	38	2744	0.0138484	0	0	0	0	1	0	0	0	1	NO	NO	NO	NO	O	NO	NO	NO	NO	NO	NO	NA	NA	25.9	NA	1143	1	1144	0.000874126	1562	37	1600	0.023125	3.85773e-08	20	20	Artifact (11)
IT_13	2	25463528	AG	A	DNMT3A	ENST00000264709	frameshift_variant	cct/|p.Pro718fs/c.2152delC	1012	51	1064	0.0479323	0	0	0	0	1	0	0	0	1	NO	NO	NO	NO	O	NO	NO	NO	NO	NO	NO	NA	NA	24.47	NA	434	0	434	0	578	51	630	0.0809524	1.81862e-12	20	20	Artifact (9)
IT_14	2	25463528	AG	A	DNMT3A	ENST00000264709	frameshift_variant	cct/|p.Pro718fs/c.2152delC	814	54	870	0.062069	0	0	0	0	1	0	0	0	1	NO	NO	NO	NO	O	NO	NO	NO	NO	NO	NO	NA	NA	25.17	NA	355	0	355	0	459	54	515	0.104854	1.89694e-13	20	20	Artifact (8)
IT_15	2	25463528	AG	A	DNMT3A	ENST00000264709	frameshift_variant	cct/|p.Pro718fs/c.2152delC	762	48	811	0.0591862	0	0	0	0	1	0	0	0	1	NO	NO	NO	NO	O	NO	NO	NO	NO	NO	NO	NA	NA	23.47	NA	302	0	302	0	460	48	509	0.0943026	9.76901e-11	20	20	Artifact (8)
IT_06	2	25463528	AG	A	DNMT3A	ENST00000264709	frameshift_variant	cct/|p.Pro718fs/c.2152delC	1284	21	1306	0.0160796	0	0	0	0	1	0	0	0	1	NO	NO	NO	NO	O	NO	NO	NO	NO	NO	NO	NA	NA	23.24	NA	576	0	576	0	708	21	730	0.0287671	5.10566e-06	20	20	Artifact (11)
IT_17	2	25463528	AG	A	DNMT3A	ENST00000264709	frameshift_variant	cct/|p.Pro718fs/c.2152delC	1110	44	1156	0.0380623	0	0	0	0	1	0	0	0	1	NO	NO	NO	NO	O	NO	NO	NO	NO	NO	NO	NA	NA	25.72	NA	505	0	507	0	605	44	649	0.0677966	7.23821e-12	20	20	Artifact (9)
IT_18	2	25463528	AG	A	DNMT3A	ENST00000264709	frameshift_variant	cct/|p.Pro718fs/c.2152delC	1304	103	1411	0.0729979	0	0	0	0	1	1	0	0	2	NO	NO	NO	NO	O	NO	NO	NO	NO	NO	NO	NA	NA	24.41	NA	481	0	481	0	823	103	930	0.110753	3.13092e-20	20	20	Artifact (7)
IT_19	2	25463528	AG	A	DNMT3A	ENST00000264709	frameshift_variant	cct/|p.Pro718fs/c.2152delC	1386	35	1422	0.0246132	0	0	0	0	1	0	0	0	1	NO	NO	NO	NO	O	NO	NO	NO	NO	NO	NO	NA	NA	24.28	NA	365	0	365	0	1021	35	1057	0.0331126	4.07732e-05	20	20	Artifact (9)
IT_22	2	25463528	AG	A	DNMT3A	ENST00000264709	frameshift_variant	cct/|p.Pro718fs/c.2152delC	2209	90	2301	0.0391134	0	0	0	0	1	0	0	0	1	NO	NO	NO	NO	O	NO	NO	NO	NO	NO	NO	NA	NA	24.94	NA	794	1	795	0.00125786	1415	89	1506	0.0590969	6.14365e-16	20	20	Artifact (9)
IT_19	2	25463549	A	AG	DNMT3A	ENST00000264709	frameshift_variant	aat/aaCt|p.Asp712fs/c.2132_2133insC	1432	23	1432	0.0160615	0	0	0	0	1	0	0	0	1	NO	NO	NO	NO	O	NO	NO	NO	NO	NO	NO	NA	NA	31.72	NA	359	23	359	0.0640669	1073	0	1073	0	2.65499e-14	1	1	Artifact (6)
IT_23	2	25463561	GC	G	DNMT3A	ENST00000264709	frameshift_variant	ggg/|p.Gly707fs/c.2116delG	1449	113	1565	0.0722045	0	0	0	0	1	1	0	0	2	NO	NO	NO	NA	NA	NO	NO	NO	1.647e-05	NO	NO	NA	NA	19.12	NA	583	9	592	0.0152027	866	104	973	0.106886	1.04844e-13	24	24	Artifact (5)
IT_24	2	25463561	GC	G	DNMT3A	ENST00000264709	frameshift_variant	ggg/|p.Gly707fs/c.2116delG	412	78	492	0.158537	0	0	0	0	1	1	0	0	2	NO	NO	NO	NA	NA	NO	NO	NO	1.647e-05	NO	NO	NA	NA	19.94	NA	231	7	238	0.0294118	181	71	254	0.279528	7.04023e-16	24	24	Artifact (5)
IT_01	2	25463561	GC	G	DNMT3A	ENST00000264709	frameshift_variant	ggg/|p.Gly707fs/c.2116delG	976	97	1075	0.0902326	0	0	0	0	1	1	0	0	2	NO	NO	NO	NA	NA	NO	NO	NO	1.647e-05	NO	NO	NA	NA	19.2	NA	399	5	404	0.0123762	577	92	671	0.137109	1.14911e-14	24	24	Artifact (5)
IT_07	2	25463561	GC	G	DNMT3A	ENST00000264709	frameshift_variant	ggg/|p.Gly707fs/c.2116delG	1158	190	1350	0.140741	0	0	0	0	1	1	0	0	2	NO	NO	NO	NA	NA	NO	NO	NO	1.647e-05	NO	NO	NA	NA	17	NA	479	3	483	0.00621118	679	187	867	0.215686	3.34717e-35	24	24	Artifact (5)
IT_08	2	25463561	GC	G	DNMT3A	ENST00000264709	frameshift_variant	ggg/|p.Gly707fs/c.2116delG	910	146	1058	0.137996	0	0	0	0	1	1	0	0	2	NO	NO	NO	NA	NA	NO	NO	NO	1.647e-05	NO	NO	NA	NA	18.08	NA	426	8	435	0.0183908	484	138	623	0.221509	2.14173e-25	24	24	Artifact (5)
IT_09	2	25463561	GC	G	DNMT3A	ENST00000264709	frameshift_variant	ggg/|p.Gly707fs/c.2116delG	1537	86	1625	0.0529231	0	0	0	0	1	0	0	0	1	NO	NO	NO	NA	NA	NO	NO	NO	1.647e-05	NO	NO	NA	NA	18.23	NA	694	15	710	0.0211268	843	71	915	0.0775956	1.61261e-07	24	24	Artifact (5)
IT_10	2	25463561	GC	G	DNMT3A	ENST00000264709	frameshift_variant	ggg/|p.Gly707fs/c.2116delG	1497	79	1581	0.0499684	0	0	0	0	1	0	0	0	1	NO	NO	NO	NA	NA	NO	NO	NO	1.647e-05	NO	NO	NA	NA	18.3	NA	725	25	751	0.0332889	772	54	830	0.0650602	0.00373524	24	24	Artifact (6)
IT_11	2	25463561	GC	G	DNMT3A	ENST00000264709	frameshift_variant	ggg/|p.Gly707fs/c.2116delG	2131	224	2362	0.0948349	0	0	0	0	1	1	0	0	2	NO	NO	NO	NA	NA	NO	NO	NO	1.647e-05	NO	NO	NA	NA	21.78	NA	988	21	1011	0.0207715	1143	203	1351	0.150259	1.217e-30	24	24	Artifact (4)
IT_12	2	25463561	GC	G	DNMT3A	ENST00000264709	frameshift_variant	ggg/|p.Gly707fs/c.2116delG	2544	217	2765	0.078481	0	0	0	0	1	1	0	0	2	NO	NO	NO	NA	NA	NO	NO	NO	1.647e-05	NO	NO	NA	NA	21.13	NA	1111	22	1133	0.0194175	1433	195	1632	0.119485	2.58785e-25	24	24	Artifact (4)
IT_13	2	25463561	GC	G	DNMT3A	ENST00000264709	frameshift_variant	ggc/|p.Gly707fs/c.2120delG	993	93	1099	0.0846224	0	1	0	0	1	1	0	0	3	NO	NO	NO	NA	NA	NO	NO	NO	1.647e-05	NO	NO	NA	NA	21.08	NA	412	16	430	0.0372093	581	77	669	0.115097	2.18443e-06	24	24	Artifact (4)
IT_14	2	25463561	GC	G	DNMT3A	ENST00000264709	frameshift_variant	ggg/|p.Gly707fs/c.2116delG	807	59	873	0.067583	0	0	0	0	1	0	0	0	1	NO	NO	NO	NA	NA	NO	NO	NO	1.647e-05	NO	NO	NA	NA	21.47	NA	331	13	345	0.0376812	476	46	528	0.0871212	0.00367202	24	24	Artifact (5)
IT_15	2	25463561	GC	G	DNMT3A	ENST00000264709	frameshift_variant	ggg/|p.Gly707fs/c.2116delG	720	94	818	0.114914	0	0	0	0	1	1	0	0	2	NO	NO	NO	NA	NA	NO	NO	NO	1.647e-05	NO	NO	NA	NA	20.39	NA	284	9	295	0.0305085	436	85	523	0.162524	1.03761e-09	24	24	Artifact (5)
IT_16	2	25463561	GC	G	DNMT3A	ENST00000264709	frameshift_variant	ggc/|p.Gly707fs/c.2120delG	127	26	153	0.169935	1	1	0	0	1	1	0	0	4	NO	NO	NO	NA	NA	NO	NO	NO	1.647e-05	NO	NO	NA	NA	19.68	NA	52	2	54	0.037037	75	24	99	0.242424	0.00120177	24	24	Artifact (4)
IT_05	2	25463561	GC	G	DNMT3A	ENST00000264709	frameshift_variant	ggg/|p.Gly707fs/c.2116delG	566	29	600	0.0483333	0	0	0	0	1	0	0	0	1	NO	NO	NO	NA	NA	NO	NO	NO	1.647e-05	NO	NO	NA	NA	20.48	NA	255	2	258	0.00775194	311	27	342	0.0789474	2.2498e-05	24	24	Artifact (7)
IT_06	2	25463561	GC	G	DNMT3A	ENST00000264709	frameshift_variant	ggg/|p.Gly707fs/c.2116delG	1251	51	1302	0.0391705	0	0	0	0	1	0	0	0	1	NO	NO	NO	NA	NA	NO	NO	NO	1.647e-05	NO	NO	NA	NA	20.48	NA	567	2	569	0.00351494	684	49	733	0.0668486	9.78288e-11	24	24	Artifact (7)
IT_17	2	25463561	GC	G	DNMT3A	ENST00000264709	frameshift_variant	ggg/|p.Gly707fs/c.2116delG	1043	103	1151	0.0894874	0	0	0	0	1	1	0	0	2	NO	NO	NO	NA	NA	NO	NO	NO	1.647e-05	NO	NO	NA	NA	22.15	NA	479	12	494	0.0242915	564	91	657	0.138508	1.01122e-12	24	24	Artifact (4)
IT_18	2	25463561	GC	G	DNMT3A	ENST00000264709	frameshift_variant	ggg/|p.Gly707fs/c.2116delG	1291	128	1423	0.0899508	0	0	0	0	1	1	0	0	2	NO	NO	NO	NA	NA	NO	NO	NO	1.647e-05	NO	NO	NA	NA	20.85	NA	456	7	464	0.0150862	835	121	959	0.126173	1.35437e-14	24	24	Artifact (5)
IT_19	2	25463561	GC	G	DNMT3A	ENST00000264709	frameshift_variant	ggg/|p.Gly707fs/c.2116delG	1360	65	1426	0.045582	0	0	0	0	1	0	0	0	1	NO	NO	NO	NA	NA	NO	NO	NO	1.647e-05	NO	NO	NA	NA	18.5	NA	348	4	352	0.0113636	1012	61	1074	0.056797	0.000103101	24	24	Artifact (7)
IT_21	2	25463561	GC	G	DNMT3A	ENST00000264709	frameshift_variant	ggg/|p.Gly707fs/c.2116delG	538	46	584	0.0787671	0	0	0	0	1	1	0	0	2	NO	NO	NO	NA	NA	NO	NO	NO	1.647e-05	NO	NO	NA	NA	21.14	NA	224	1	225	0.00444444	314	45	359	0.125348	3.76575e-09	24	24	Artifact (5)
IT_22	2	25463561	GC	G	DNMT3A	ENST00000264709	frameshift_variant	ggc/|p.Gly707fs/c.2120delG	1945	359	2306	0.155681	1	0	0	0	1	1	0	0	3	NO	NO	NO	NA	NA	NO	NO	NO	1.647e-05	NO	NO	NA	NA	20.32	NA	765	20	785	0.0254777	1180	339	1521	0.22288	7.72257e-44	24	24	Artifact (4)
IT_18	2	25463582	TG	T	DNMT3A	ENST00000264709	frameshift_variant	cca/|p.Pro700fs/c.2098delC	1371	39	1421	0.0274455	0	0	0	0	1	0	0	0	1	NO	NO	NO	NO	O	NO	NO	NO	8.236e-06	NO	NO	NA	NA	23.21	NA	454	0	455	0	917	39	966	0.0403727	2.56016e-07	5	5	Artifact (5)
IT_19	2	25463585	G	GC	DNMT3A	ENST00000264709	frameshift_variant	tgg/tggG|p.Phe701fs/c.2094dupG	1421	22	1426	0.0154278	0	0	0	0	1	0	0	0	1	NO	NO	NO	NA	NA	NO	NO	NO	8.236e-06	NO	NO	NA	NA	27.43	NA	342	21	343	0.0612245	1079	1	1083	0.000923361	2.81833e-12	1	22	Artifact (6)
IT_23	2	25463585	GC	G	DNMT3A	ENST00000264709	frameshift_variant	ggc/|p.Gly699fs/c.2095delG	1508	50	1559	0.0320718	0	0	0	0	1	0	0	0	1	NO	NO	NO	NA	NA	NO	NO	NO	NO	NO	NO	NA	NA	17.93	NA	542	38	581	0.0654045	966	12	978	0.0122699	1.76888e-08	21	22	Artifact (9)
IT_24	2	25463585	GC	G	DNMT3A	ENST00000264709	frameshift_variant	ggc/|p.Gly699fs/c.2095delG	416	66	482	0.136929	0	0	0	0	1	1	0	0	2	NO	NO	NO	NA	NA	NO	NO	NO	NO	NO	NO	NA	NA	16.81	NA	172	53	225	0.235556	244	13	257	0.0505837	3.33364e-09	21	22	Artifact (6)
IT_07	2	25463585	GC	G	DNMT3A	ENST00000264709	frameshift_variant	ggc/|p.Gly699fs/c.2095delG	1320	28	1348	0.0207715	0	0	0	0	1	0	0	0	1	NO	NO	NO	NA	NA	NO	NO	NO	NO	NO	NO	NA	NA	17.65	NA	454	21	475	0.0442105	866	7	873	0.00801833	2.15752e-05	21	22	Artifact (10)
IT_09	2	25463585	GC	G	DNMT3A	ENST00000264709	frameshift_variant	ggc/|p.Gly699fs/c.2095delG	1583	23	1607	0.0143124	0	0	0	0	1	0	0	0	1	NO	NO	NO	NA	NA	NO	NO	NO	NO	NO	NO	NA	NA	19.51	NA	673	15	688	0.0218023	910	8	919	0.00870511	0.0339534	21	22	Artifact (11)
IT_10	2	25463585	GC	G	DNMT3A	ENST00000264709	frameshift_variant	ggc/|p.Gly699fs/c.2095delG	1539	36	1578	0.0228137	0	0	0	0	1	0	0	0	1	NO	NO	NO	NA	NA	NO	NO	NO	NO	NO	NO	NA	NA	20.07	NA	721	18	740	0.0243243	818	18	838	0.0214797	0.73786	21	22	Artifact (9)
IT_11	2	25463585	GC	G	DNMT3A	ENST00000264709	frameshift_variant	ggc/|p.Gly699fs/c.2095delG	2301	46	2348	0.0195911	0	0	0	0	1	0	0	0	1	NO	NO	NO	NA	NA	NO	NO	NO	NO	NO	NO	NA	NA	23.43	NA	985	20	1005	0.0199005	1316	26	1343	0.0193596	1	21	22	Artifact (11)
IT_12	2	25463585	GC	G	DNMT3A	ENST00000264709	frameshift_variant	ggc/|p.Gly699fs/c.2095delG	2727	32	2763	0.0115816	0	0	0	0	1	0	0	0	1	NO	NO	NO	NA	NA	NO	NO	NO	NO	NO	NO	NA	NA	23.43	NA	1108	13	1125	0.0115556	1619	19	1638	0.0115995	1	21	22	Artifact (11)
IT_13	2	25463585	GC	G	DNMT3A	ENST00000264709	frameshift_variant	ggc/|p.Gly699fs/c.2095delG	1051	31	1087	0.0285189	0	0	0	0	1	0	0	0	1	NO	NO	NO	NA	NA	NO	NO	NO	NO	NO	NO	NA	NA	21.1	NA	411	7	421	0.0166271	640	24	666	0.036036	0.090356	21	22	Artifact (9)
IT_14	2	25463585	GC	G	DNMT3A	ENST00000264709	frameshift_variant	ggc/|p.Gly699fs/c.2095delG	847	26	875	0.0297143	0	0	0	0	1	0	0	0	1	NO	NO	NO	NA	NA	NO	NO	NO	NO	NO	NO	NA	NA	22.03	NA	324	16	342	0.0467836	523	10	533	0.0187617	0.0232175	21	22	Artifact (9)
IT_15	2	25463585	GC	G	DNMT3A	ENST00000264709	frameshift_variant	ggc/|p.Gly699fs/c.2095delG	776	35	813	0.0430504	0	0	0	0	1	0	0	0	1	NO	NO	NO	NA	NA	NO	NO	NO	NO	NO	NO	NA	NA	20.74	NA	259	26	287	0.0905923	517	9	526	0.0171103	1.7858e-06	21	22	Artifact (10)
IT_06	2	25463585	GC	G	DNMT3A	ENST00000264709	frameshift_variant	ggc/|p.Gly699fs/c.2095delG	1277	28	1305	0.0214559	0	0	0	0	1	0	0	0	1	NO	NO	NO	NA	NA	NO	NO	NO	NO	NO	NO	NA	NA	18.87	NA	550	18	568	0.0316901	727	10	737	0.0135685	0.0328195	21	22	Artifact (9)
IT_17	2	25463585	GC	G	DNMT3A	ENST00000264709	frameshift_variant	ggc/|p.Gly699fs/c.2095delG	1117	23	1143	0.0201225	0	0	0	0	1	0	0	0	1	NO	NO	NO	NA	NA	NO	NO	NO	NO	NO	NO	NA	NA	21.74	NA	464	16	482	0.033195	653	7	661	0.01059	0.00942121	21	22	Artifact (9)
IT_18	2	25463585	GC	G	DNMT3A	ENST00000264709	frameshift_variant	ggc/|p.Gly699fs/c.2095delG	1390	24	1414	0.0169731	0	0	0	0	1	0	0	0	1	NO	NO	NO	NA	NA	NO	NO	NO	NO	NO	NO	NA	NA	20.7	NA	445	10	455	0.021978	945	14	959	0.0145985	0.377894	21	22	Artifact (11)
IT_22	2	25463585	GC	G	DNMT3A	ENST00000264709	frameshift_variant	ggc/|p.Gly699fs/c.2095delG	2259	42	2303	0.0182371	0	0	0	0	1	0	0	0	1	NO	NO	NO	NA	NA	NO	NO	NO	NO	NO	NO	NA	NA	21.52	NA	758	15	774	0.0193798	1501	27	1529	0.0176586	0.74459	21	22	Artifact (11)
IT_15	2	25464450	C	CG	DNMT3A	ENST00000264709	frameshift_variant	gtc/gtCc|p.Arg688fs/c.2060_2061insC	1994	25	1997	0.0125188	0	0	0	0	1	0	0	0	1	NO	NO	NO	NA	NA	NO	NO	NO	NO	NO	NO	NA	NA	27.87	NA	1022	11	1024	0.0107422	972	14	973	0.0143885	0.548063	2	2	Artifact (5)
IT_10	2	25464453	A	AC	DNMT3A	ENST00000264709	frameshift_variant	gac/gacG|p.Val687fs/c.2058_2059insG	1384	30	1396	0.02149	0	0	0	0	1	0	0	0	1	NO	NO	NO	NA	NA	NO	NO	NO	NO	NO	NO	NA	NA	26.77	NA	710	0	710	0	674	30	686	0.0437318	5.97123e-10	17	18	Artifact (10)
IT_12	2	25464453	A	AC	DNMT3A	ENST00000264709	frameshift_variant	gac/gacG|p.Val687fs/c.2058_2059insG	1088	27	1091	0.0247479	0	0	0	0	1	0	0	0	1	NO	NO	NO	NA	NA	NO	NO	NO	NO	NO	NO	NA	NA	26.63	NA	511	0	513	0	577	27	578	0.0467128	6.61139e-08	17	18	Artifact (10)
IT_13	2	25464453	A	AC	DNMT3A	ENST00000264709	frameshift_variant	gac/gacG|p.Val687fs/c.2058_2059insG	485	29	493	0.0588235	0	0	0	0	1	0	0	0	1	NO	NO	NO	NA	NA	NO	NO	NO	NO	NO	NO	NA	NA	26.59	NA	215	0	216	0	270	29	277	0.104693	1.33519e-07	17	18	Artifact (9)
IT_14	2	25464453	A	AC	DNMT3A	ENST00000264709	frameshift_variant	gtc/gGtc|p.Val687fs/c.2059dupG	914	82	921	0.0890337	0	1	0	0	1	1	0	0	3	NO	NO	NO	NA	NA	NO	NO	NO	NO	NO	NO	NA	NA	25.23	NA	448	0	449	0	466	82	472	0.173729	3.09816e-23	17	18	Artifact (8)
IT_15	2	25464453	A	AC	DNMT3A	ENST00000264709	frameshift_variant	gac/gacG|p.Val687fs/c.2058_2059insG	1963	97	1996	0.0485972	0	0	0	0	1	0	0	0	1	NO	NO	NO	NA	NA	NO	NO	NO	NO	NO	NO	NA	NA	26.18	NA	1019	0	1022	0	944	97	974	0.0995893	1.93294e-30	17	18	Artifact (10)
IT_16	2	25464453	A	AC	DNMT3A	ENST00000264709	frameshift_variant	gac/gacG|p.Val687fs/c.2058_2059insG	2209	58	2234	0.0259624	0	0	0	0	1	0	0	0	1	NO	NO	NO	NA	NA	NO	NO	NO	NO	NO	NO	NA	NA	26.96	NA	1055	0	1059	0	1154	58	1175	0.0493617	1.45197e-16	17	18	Artifact (10)
IT_06	2	25464453	A	AC	DNMT3A	ENST00000264709	frameshift_variant	gac/gacG|p.Val687fs/c.2058_2059insG	2226	41	2237	0.0183281	0	0	0	0	1	0	0	0	1	NO	NO	NO	NA	NA	NO	NO	NO	NO	NO	NO	NA	NA	26.68	NA	1062	0	1063	0	1164	41	1174	0.0349233	5.05857e-12	17	18	Artifact (12)
IT_17	2	25464453	A	AC	DNMT3A	ENST00000264709	frameshift_variant	gac/gacG|p.Val687fs/c.2058_2059insG	842	30	850	0.0352941	0	0	0	0	1	0	0	0	1	NO	NO	NO	NA	NA	NO	NO	NO	NO	NO	NO	NA	NA	27.6	NA	444	0	446	0	398	30	404	0.0742574	3.12644e-10	17	18	Artifact (10)
IT_18	2	25464453	A	AC	DNMT3A	ENST00000264709	frameshift_variant	gtc/gGtc|p.Val687fs/c.2059dupG	567	37	575	0.0643478	0	1	0	0	1	0	0	0	2	NO	NO	NO	NA	NA	NO	NO	NO	NO	NO	NO	NA	NA	26.98	NA	282	0	283	0	285	37	292	0.126712	3.54046e-11	17	18	Artifact (8)
IT_19	2	25464453	A	AC	DNMT3A	ENST00000264709	frameshift_variant	gac/gacG|p.Val687fs/c.2058_2059insG	5744	234	5775	0.0405195	0	0	0	0	1	0	0	0	1	NO	NO	NO	NA	NA	NO	NO	NO	NO	NO	NO	NA	NA	27.94	NA	2555	1	2556	0.000391236	3189	233	3219	0.0723827	2.17203e-56	17	18	Artifact (10)
IT_20	2	25464453	A	AC	DNMT3A	ENST00000264709	frameshift_variant	gac/gacG|p.Val687fs/c.2058_2059insG	1421	30	1425	0.0210526	0	0	0	0	1	0	0	0	1	NO	NO	NO	NA	NA	NO	NO	NO	NO	NO	NO	NA	NA	28.71	NA	685	0	685	0	736	30	740	0.0405405	3.73272e-09	17	18	Artifact (10)
IT_21	2	25464453	A	AC	DNMT3A	ENST00000264709	frameshift_variant	gac/gacG|p.Val687fs/c.2058_2059insG	2602	51	2615	0.0195029	0	0	0	0	1	0	0	0	1	NO	NO	NO	NA	NA	NO	NO	NO	NO	NO	NO	NA	NA	27.94	NA	1182	0	1185	0	1420	51	1430	0.0356643	9.054e-14	17	18	Artifact (12)
IT_22	2	25464453	A	AC	DNMT3A	ENST00000264709	frameshift_variant	gac/gacG|p.Val687fs/c.2058_2059insG	2371	79	2380	0.0331933	0	0	0	0	1	0	0	0	1	NO	NO	NO	NA	NA	NO	NO	NO	NO	NO	NO	NA	NA	27.38	NA	1086	0	1088	0	1285	79	1292	0.0611455	5.3801e-21	17	18	Artifact (10)
IT_23	2	25464456	T	TC	DNMT3A	ENST00000264709	frameshift_variant	ggg/ggGg|p.Asp686fs/c.2054dupG	1897	71	1904	0.0372899	0	0	0	0	1	0	0	0	1	NO	NO	NO	NO	O	NO	NO	NO	NO	NO	NO	NA	NA	26.17	NA	898	64	903	0.0708749	999	7	1001	0.00699301	7.96354e-14	24	27	Artifact (10)
IT_01	2	25464456	T	TC	DNMT3A	ENST00000264709	frameshift_variant	ggg/ggGg|p.Asp686fs/c.2054dupG	2480	63	2514	0.0250597	0	0	0	0	1	0	0	0	1	NO	NO	NO	NO	O	NO	NO	NO	NO	NO	NO	NA	NA	26.46	NA	1163	61	1192	0.0511745	1317	2	1322	0.00151286	1.14179e-17	24	27	Artifact (10)
IT_07	2	25464456	T	TC	DNMT3A	ENST00000264709	frameshift_variant	ggg/ggGg|p.Asp686fs/c.2054dupG	1432	43	1438	0.0299026	0	0	0	0	1	0	0	0	1	NO	NO	NO	NO	O	NO	NO	NO	NO	NO	NO	NA	NA	24.98	NA	755	42	757	0.0554822	677	1	681	0.00146843	1.11254e-10	24	27	Artifact (10)
IT_08	2	25464456	T	TC	DNMT3A	ENST00000264709	frameshift_variant	ggg/ggGg|p.Asp686fs/c.2054dupG	1548	48	1558	0.0308087	0	0	0	0	1	0	0	0	1	NO	NO	NO	NO	O	NO	NO	NO	NO	NO	NO	NA	NA	25.44	NA	687	46	696	0.066092	861	2	862	0.00232019	4.69315e-14	24	27	Artifact (10)
IT_09	2	25464456	T	TC	DNMT3A	ENST00000264709	frameshift_variant	ggg/ggGg|p.Asp686fs/c.2054dupG	1578	28	1588	0.0176322	0	0	0	0	1	0	0	0	1	NO	NO	NO	NO	O	NO	NO	NO	NO	NO	NO	NA	NA	26.87	NA	685	16	692	0.0231214	893	12	896	0.0133929	0.178634	24	27	Artifact (11)
IT_10	2	25464456	T	TC	DNMT3A	ENST00000264709	frameshift_variant	ggg/ggGg|p.Asp686fs/c.2054dupG	1382	43	1400	0.0307143	0	0	0	0	1	0	0	0	1	NO	NO	NO	NO	O	NO	NO	NO	NO	NO	NO	NA	NA	25.75	NA	694	38	710	0.0535211	688	5	690	0.00724638	2.46459e-07	24	27	Artifact (10)
IT_11	2	25464456	T	TC	DNMT3A	ENST00000264709	frameshift_variant	ggg/ggGg|p.Asp686fs/c.2054dupG	400	20	400	0.05	0	0	0	0	1	0	0	0	1	NO	NO	NO	NO	O	NO	NO	NO	NO	NO	NO	NA	NA	27.32	NA	203	19	203	0.0935961	197	1	197	0.00507614	4.33987e-05	24	27	Artifact (9)
IT_12	2	25464456	T	TC	DNMT3A	ENST00000264709	frameshift_variant	gac/gGac|p.Asp686fs/c.2056dupG	1084	228	1092	0.208791	0	1	0	0	1	1	0	0	3	NO	NO	NO	NO	O	NO	NO	NO	NO	NO	NO	NA	NA	26.1	NA	510	224	513	0.436647	574	4	579	0.00690846	6.66849e-58	24	27	Artifact (7)
IT_14	2	25464456	T	TC	DNMT3A	ENST00000264709	frameshift_variant	ggg/ggGg|p.Asp686fs/c.2054dupG	907	78	921	0.0846906	0	0	0	0	1	1	0	0	2	NO	NO	NO	NO	O	NO	NO	NO	NO	NO	NO	NA	NA	25.35	NA	435	72	447	0.161074	472	6	474	0.0126582	8.17862e-16	24	27	Artifact (8)
IT_15	2	25464456	T	TC	DNMT3A	ENST00000264709	frameshift_variant	ggg/ggGg|p.Asp686fs/c.2054dupG	1953	129	2008	0.064243	0	0	0	0	1	1	0	0	2	NO	NO	NO	NO	O	NO	NO	NO	NO	NO	NO	NA	NA	25.46	NA	968	115	1021	0.112635	985	14	987	0.0141844	3.06326e-20	24	27	Artifact (7)
IT_16	2	25464456	T	TC	DNMT3A	ENST00000264709	frameshift_variant	ggg/ggGg|p.Asp686fs/c.2054dupG	2209	102	2237	0.0455968	0	0	0	0	1	1	0	0	2	NO	NO	NO	NO	O	NO	NO	NO	NO	NO	NO	NA	NA	26.48	NA	1032	90	1056	0.0852273	1177	12	1181	0.0101609	8.21605e-18	24	27	Artifact (8)
IT_05	2	25464456	T	TC	DNMT3A	ENST00000264709	frameshift_variant	ggg/ggGg|p.Asp686fs/c.2054dupG	3198	166	3213	0.0516651	0	0	0	0	1	1	0	0	2	NO	NO	NO	NO	O	NO	NO	NO	NO	NO	NO	NA	NA	25.55	NA	1573	162	1580	0.102532	1625	4	1633	0.00244948	2.29133e-42	24	27	Artifact (8)
IT_06	2	25464456	T	TC	DNMT3A	ENST00000264709	frameshift_variant	ggg/ggGg|p.Asp686fs/c.2054dupG	2231	119	2241	0.0531013	0	0	0	0	1	1	0	0	2	NO	NO	NO	NO	O	NO	NO	NO	NO	NO	NO	NA	NA	25.64	NA	1059	116	1062	0.109228	1172	3	1179	0.00254453	4.94871e-32	24	27	Artifact (8)
IT_17	2	25464456	T	TC	DNMT3A	ENST00000264709	frameshift_variant	gac/gGac|p.Asp686fs/c.2056dupG	837	97	853	0.113716	0	1	0	0	1	1	0	0	3	NO	NO	NO	NO	O	NO	NO	NO	NO	NO	NO	NA	NA	26.39	NA	434	91	446	0.204036	403	6	407	0.014742	8.24502e-18	24	27	Artifact (7)
IT_18	2	25464456	T	TC	DNMT3A	ENST00000264709	frameshift_variant	ggg/ggGg|p.Asp686fs/c.2054dupG	570	27	577	0.0467938	0	0	0	0	1	0	0	0	1	NO	NO	NO	NO	O	NO	NO	NO	NO	NO	NO	NA	NA	26.3	NA	279	23	283	0.0812721	291	4	294	0.0136054	0.000235025	24	27	Artifact (10)
IT_19	2	25464456	T	TC	DNMT3A	ENST00000264709	frameshift_variant	ggg/ggGg|p.Asp686fs/c.2054dupG	5729	238	5775	0.0412121	0	0	0	0	1	1	0	0	2	NO	NO	NO	NO	O	NO	NO	NO	NO	NO	NO	NA	NA	26.86	NA	2519	226	2551	0.0885927	3210	12	3224	0.00372208	1.83224e-62	24	27	Artifact (8)
IT_20	2	25464456	T	TC	DNMT3A	ENST00000264709	frameshift_variant	ggg/ggGg|p.Asp686fs/c.2054dupG	1420	98	1429	0.0685794	0	0	0	0	1	1	0	0	2	NO	NO	NO	NO	O	NO	NO	NO	NO	NO	NO	NA	NA	26.61	NA	676	95	685	0.138686	744	3	744	0.00403226	1.26583e-25	24	27	Artifact (8)
IT_21	2	25464456	T	TC	DNMT3A	ENST00000264709	frameshift_variant	ggg/ggGg|p.Asp686fs/c.2054dupG	2604	149	2617	0.0569354	0	0	0	0	1	1	0	0	2	NO	NO	NO	NO	O	NO	NO	NO	NO	NO	NO	NA	NA	27.4	NA	1172	140	1183	0.118343	1432	9	1434	0.00627615	6.10258e-36	24	27	Artifact (8)
IT_22	2	25464456	T	TC	DNMT3A	ENST00000264709	frameshift_variant	gac/gGac|p.Asp686fs/c.2056dupG	2371	67	2381	0.0281394	0	1	0	0	1	0	0	0	2	NO	NO	NO	NO	O	NO	NO	NO	NO	NO	NO	NA	NA	26.24	NA	1080	64	1087	0.0588776	1291	3	1294	0.00231839	3.03077e-18	24	27	Artifact (9)
IT_22	2	25464456	TC	T	DNMT3A	ENST00000264709	frameshift_variant	ggg/|p.Asp686fs/c.2055delG	2350	29	2382	0.0121746	0	0	0	0	1	0	0	0	1	NO	NO	NO	NO	O	NO	NO	NO	NO	NO	NO	NA	NA	20.93	NA	1087	0	1087	0	1263	29	1295	0.0223938	2.17496e-08	3	27	Artifact (7)
IT_15	2	25464462	A	AC	DNMT3A	ENST00000264709	frameshift_variant	tac/tacG|p.Val684fs/c.2049_2050insG	2001	40	2004	0.0199601	0	0	0	0	1	0	0	0	1	NO	NO	NO	NO	O	NO	NO	NO	NO	NO	NO	NA	NA	27.34	NA	1009	40	1010	0.039604	992	0	994	0	2.08758e-12	10	10	Artifact (8)
IT_16	2	25464462	A	AC	DNMT3A	ENST00000264709	frameshift_variant	tac/tacG|p.Val684fs/c.2049_2050insG	2226	27	2239	0.012059	0	0	0	0	1	0	0	0	1	NO	NO	NO	NO	O	NO	NO	NO	NO	NO	NO	NA	NA	27.97	NA	1040	22	1046	0.0210325	1186	5	1193	0.00419111	0.000320424	10	10	Artifact (8)
IT_21	2	25464462	A	AC	DNMT3A	ENST00000264709	frameshift_variant	tac/tacG|p.Val684fs/c.2049_2050insG	2609	32	2619	0.0122184	0	0	0	0	1	0	0	0	1	NO	NO	NO	NO	O	NO	NO	NO	NO	NO	NO	NA	NA	29.33	NA	1178	15	1182	0.0126904	1431	17	1437	0.0118302	0.859978	10	10	Artifact (7)
IT_23	2	25464475	T	C	DNMT3A	ENST00000264709	missense_variant	Aag/Gag|p.Lys680Glu/c.2038A>G	2374	44	2419	0.0181893	0	0	0	0	1	0	0	0	1	NO	NO	NO	NO	O	NO	NO	NO	NO	NO	NO	-1.08	Tolerated	26.03	23.64	1104	42	1147	0.0366173	1270	2	1272	0.00157233	4.904e-12	22	27	Artifact (11)
IT_07	2	25464475	T	C	DNMT3A	ENST00000264709	missense_variant	Aag/Gag|p.Lys680Glu/c.2038A>G	1857	31	1888	0.0164195	0	0	0	0	1	0	0	0	1	NO	NO	NO	NO	O	NO	NO	NO	NO	NO	NO	-1.08	Tolerated	25.72	22.9	952	27	979	0.0275792	905	4	909	0.00440044	4.08475e-05	22	27	Artifact (11)
IT_08	2	25464475	T	C	DNMT3A	ENST00000264709	missense_variant	Aag/Gag|p.Lys680Glu/c.2038A>G	1974	30	2004	0.0149701	0	0	0	0	1	0	0	0	1	NO	NO	NO	NO	O	NO	NO	NO	NO	NO	NO	-1.08	Tolerated	26.13	23.17	914	29	943	0.0307529	1060	1	1061	0.000942507	4.21582e-09	22	27	Artifact (11)
IT_09	2	25464475	T	C	DNMT3A	ENST00000264709	missense_variant	Aag/Gag|p.Lys680Glu/c.2038A>G	2186	171	2358	0.0725191	0	0	0	0	0	1	0	0	1	NO	NO	NO	NO	O	NO	NO	NO	NO	NO	NO	-1.08	Tolerated	25.46	23.94	972	168	1141	0.147239	1214	3	1217	0.00246508	1.67156e-51	22	27	Artifact (9)
IT_15	2	25464475	T	C	DNMT3A	ENST00000264709	missense_variant	Aag/Gag|p.Lys680Glu/c.2038A>G	2311	30	2343	0.0128041	0	0	0	0	1	0	0	0	1	NO	NO	NO	NO	O	NO	NO	NO	NO	NO	NO	-1.08	Tolerated	24.86	23.5	1135	29	1165	0.0248927	1176	1	1178	0.000848896	2.18319e-08	22	27	Artifact (11)
IT_05	2	25464475	T	C	DNMT3A	ENST00000264709	missense_variant	Aag/Gag|p.Lys680Glu/c.2038A>G	3630	45	3675	0.0122449	0	0	0	0	1	0	0	0	1	NO	NO	NO	NO	O	NO	NO	NO	NO	NO	NO	-1.08	Tolerated	25.58	23.02	1771	44	1815	0.0242424	1859	1	1860	0.000537634	6.3345e-13	22	27	Artifact (11)
IT_06	2	25464475	T	C	DNMT3A	ENST00000264709	missense_variant	Aag/Gag|p.Lys680Glu/c.2038A>G	2795	78	2873	0.0271493	0	0	0	0	1	0	0	0	1	NO	NO	NO	NO	O	NO	NO	NO	NO	NO	NO	-1.08	Tolerated	25.94	24.65	1337	78	1415	0.0551237	1458	0	1458	0	3.37223e-25	22	27	Artifact (9)
IT_18	2	25464475	T	C	DNMT3A	ENST00000264709	missense_variant	Aag/Gag|p.Lys680Glu/c.2038A>G	1063	64	1130	0.0566372	0	0	0	0	0	1	0	0	1	NO	NO	NO	NO	O	NO	NO	NO	NO	NO	NO	-1.08	Tolerated	26.46	22.66	528	63	594	0.106061	535	1	536	0.00186567	1.44286e-17	22	27	Artifact (9)
IT_19	2	25464475	T	C	DNMT3A	ENST00000264709	missense_variant	Aag/Gag|p.Lys680Glu/c.2038A>G	6023	200	6224	0.0321337	0	0	0	0	1	0	0	0	1	NO	NO	NO	NO	O	NO	NO	NO	NO	NO	NO	-1.08	Tolerated	27.6	23.76	2656	199	2855	0.0697023	3367	1	3369	0.000296824	1.07352e-67	22	27	Artifact (9)
IT_20	2	25464475	T	C	DNMT3A	ENST00000264709	missense_variant	Aag/Gag|p.Lys680Glu/c.2038A>G	1464	44	1508	0.0291777	0	0	0	0	1	0	0	0	1	NO	NO	NO	NO	O	NO	NO	NO	NO	NO	NO	-1.08	Tolerated	26.89	23.77	703	44	747	0.0589023	761	0	761	0	1.95236e-14	22	27	Artifact (9)
IT_09	2	25464475	T	TC	DNMT3A	ENST00000264709	frameshift_variant	ggg/gGgg|p.Lys680fs/c.2035dupG	2186	36	2358	0.0152672	0	0	0	0	1	0	0	0	1	NO	NO	NO	NO	O	NO	NO	NO	NO	NO	NO	NA	NA	25.46	NA	972	21	1141	0.0184049	1214	15	1217	0.0123254	0.127238	11	27	Artifact (8)
IT_10	2	25464475	T	TC	DNMT3A	ENST00000264709	frameshift_variant	ggg/gGgg|p.Lys680fs/c.2035dupG	2006	47	2089	0.0224988	0	0	0	0	1	0	0	0	1	NO	NO	NO	NO	O	NO	NO	NO	NO	NO	NO	NA	NA	25.02	NA	992	35	1075	0.0325581	1014	12	1014	0.0118343	0.000955126	11	27	Artifact (6)
IT_12	2	25464475	T	TC	DNMT3A	ENST00000264709	frameshift_variant	ggg/gGgg|p.Lys680fs/c.2035dupG	2238	78	2383	0.0327319	0	0	0	0	1	0	0	0	1	NO	NO	NO	NO	O	NO	NO	NO	NO	NO	NO	NA	NA	27.59	NA	1069	70	1214	0.0576606	1169	8	1169	0.00684346	2.43642e-14	11	27	Artifact (7)
IT_14	2	25464475	T	TC	DNMT3A	ENST00000264709	frameshift_variant	ggg/gGgg|p.Lys680fs/c.2035dupG	1265	48	1286	0.037325	0	0	0	0	1	0	0	0	1	NO	NO	NO	NO	O	NO	NO	NO	NO	NO	NO	NA	NA	26.48	NA	614	43	634	0.0678233	651	5	652	0.00766871	7.82557e-09	11	27	Artifact (7)
IT_17	2	25464475	T	TC	DNMT3A	ENST00000264709	frameshift_variant	ggg/gGgg|p.Lys680fs/c.2035dupG	1138	44	1176	0.037415	0	0	0	0	1	0	0	0	1	NO	NO	NO	NO	O	NO	NO	NO	NO	NO	NO	NA	NA	25.65	NA	569	37	606	0.0610561	569	7	570	0.0122807	4.74458e-06	11	27	Artifact (7)
IT_21	2	25464475	T	TC	DNMT3A	ENST00000264709	frameshift_variant	ggg/gGgg|p.Lys680fs/c.2035dupG	2773	44	2788	0.0157819	0	0	0	0	1	0	0	0	1	NO	NO	NO	NO	O	NO	NO	NO	NO	NO	NO	NA	NA	26.98	NA	1258	28	1269	0.0220646	1515	16	1519	0.0105332	0.0211644	11	27	Artifact (8)
IT_22	2	25464475	T	TC	DNMT3A	ENST00000264709	frameshift_variant	ggg/gGgg|p.Lys680fs/c.2035dupG	3597	37	3642	0.0101593	0	0	0	0	1	0	0	0	1	NO	NO	NO	NO	O	NO	NO	NO	NO	NO	NO	NA	NA	28.38	NA	1663	17	1707	0.00995899	1934	20	1935	0.0103359	1	11	27	Artifact (8)
IT_24	2	25464475	TC	T	DNMT3A	ENST00000264709	frameshift_variant	ggg/|p.Lys680fs/c.2036delG	1145	49	1196	0.0409699	0	0	0	0	1	1	0	0	2	NO	NO	NO	NO	O	NO	NO	NO	NO	NO	NO	NA	NA	19.88	NA	495	43	539	0.0797774	650	6	657	0.00913242	3.36985e-10	5	27	Artifact (6)
IT_15	2	25464475	TC	T	DNMT3A	ENST00000264709	frameshift_variant	ggg/|p.Lys680fs/c.2036delG	3155	38	3194	0.0118973	0	0	0	0	1	0	0	0	1	NO	NO	NO	NO	O	NO	NO	NO	NO	NO	NO	NA	NA	23.35	NA	1605	28	1634	0.0171359	1550	10	1560	0.00641026	0.00526411	5	27	Artifact (8)
IT_16	2	25464475	TC	T	DNMT3A	ENST00000264709	frameshift_variant	ggg/|p.Lys680fs/c.2036delG	2277	51	2331	0.021879	0	0	0	0	1	0	0	0	1	NO	NO	NO	NO	O	NO	NO	NO	NO	NO	NO	NA	NA	23.17	NA	1029	44	1075	0.0409302	1248	7	1256	0.00557325	2.13545e-09	5	27	Artifact (7)
IT_23	2	25464487	G	GC	DNMT3A	ENST00000264709	frameshift_variant	gtg/gtGg|p.Arg676fs/c.2024_2025insG	4219	96	4227	0.0227111	0	0	0	0	1	0	0	0	1	NO	NO	NO	NA	NA	NO	NO	NO	NO	NO	NO	NA	NA	29.7	NA	2128	2	2132	0.000938086	2091	94	2095	0.0448687	7.82395e-26	23	23	Artifact (9)
IT_24	2	25464487	G	GC	DNMT3A	ENST00000264709	frameshift_variant	gtg/gtGg|p.Arg676fs/c.2024_2025insG	1143	20	1144	0.0174825	0	0	0	0	1	0	0	0	1	NO	NO	NO	NA	NA	NO	NO	NO	NO	NO	NO	NA	NA	28.42	NA	463	0	463	0	680	20	681	0.0293686	7.31471e-05	23	23	Artifact (11)
IT_01	2	25464487	G	GC	DNMT3A	ENST00000264709	frameshift_variant	gtg/gtGg|p.Arg676fs/c.2024_2025insG	4785	151	4792	0.0315109	0	0	0	0	1	0	0	0	1	NO	NO	NO	NA	NA	NO	NO	NO	NO	NO	NO	NA	NA	29.09	NA	2394	6	2395	0.00250522	2391	145	2397	0.0604923	4.21907e-35	23	23	Artifact (9)
IT_02	2	25464487	G	GC	DNMT3A	ENST00000264709	frameshift_variant	gtg/gtGg|p.Arg676fs/c.2024_2025insG	1411	33	1412	0.0233711	0	0	0	0	1	0	0	0	1	NO	NO	NO	NA	NA	NO	NO	NO	NO	NO	NO	NA	NA	29.18	NA	671	2	672	0.00297619	740	31	740	0.0418919	4.19221e-07	23	23	Artifact (9)
IT_03	2	25464487	G	GC	DNMT3A	ENST00000264709	frameshift_variant	gtg/gtGg|p.Arg676fs/c.2024_2025insG	865	38	865	0.0439306	0	0	0	0	1	0	0	0	1	NO	NO	NO	NA	NA	NO	NO	NO	NO	NO	NO	NA	NA	29.2	NA	450	0	450	0	415	38	415	0.0915663	3.25599e-12	23	23	Artifact (9)
IT_04	2	25464487	G	GC	DNMT3A	ENST00000264709	frameshift_variant	gtg/gtGg|p.Arg676fs/c.2024_2025insG	950	36	951	0.0378549	0	0	0	0	1	0	0	0	1	NO	NO	NO	NA	NA	NO	NO	NO	NO	NO	NO	NA	NA	29.29	NA	478	0	479	0	472	36	472	0.0762712	2.53152e-11	23	23	Artifact (9)
IT_07	2	25464487	G	GC	DNMT3A	ENST00000264709	frameshift_variant	gtg/gtGg|p.Arg676fs/c.2024_2025insG	2995	42	3005	0.0139767	0	0	0	0	1	0	0	0	1	NO	NO	NO	NA	NA	NO	NO	NO	NO	NO	NO	NA	NA	30.05	NA	1599	3	1602	0.00187266	1396	39	1403	0.0277976	3.5022e-10	23	23	Artifact (11)
IT_08	2	25464487	G	GC	DNMT3A	ENST00000264709	frameshift_variant	gtg/gtGg|p.Arg676fs/c.2024_2025insG	2841	35	2845	0.0123023	0	0	0	0	1	0	0	0	1	NO	NO	NO	NA	NA	NO	NO	NO	NO	NO	NO	NA	NA	29.92	NA	1401	2	1402	0.00142653	1440	33	1443	0.022869	4.03522e-08	23	23	Artifact (11)
IT_09	2	25464487	G	GC	DNMT3A	ENST00000264709	frameshift_variant	gtg/gtGg|p.Arg676fs/c.2024_2025insG	4430	106	4439	0.0238793	0	0	0	0	1	0	0	0	1	NO	NO	NO	NA	NA	NO	NO	NO	NO	NO	NO	NA	NA	29.34	NA	2157	2	2163	0.000924642	2273	104	2276	0.0456942	3.07756e-27	23	23	Artifact (9)
IT_10	2	25464487	G	GC	DNMT3A	ENST00000264709	frameshift_variant	gtg/gtGg|p.Arg676fs/c.2024_2025insG	4172	139	4175	0.0332934	0	0	0	0	1	0	0	0	1	NO	NO	NO	NA	NA	NO	NO	NO	NO	NO	NO	NA	NA	28.7	NA	2085	3	2087	0.00143747	2087	136	2088	0.0651341	6.58223e-36	23	23	Artifact (9)
IT_11	2	25464487	G	GC	DNMT3A	ENST00000264709	frameshift_variant	gtg/gtgG|p.Arg676fs/c.2025dupG	3635	620	3639	0.170376	0	1	0	0	1	1	0	0	3	NO	NO	NO	NA	NA	NO	NO	NO	NO	NO	NO	NA	NA	28.5	NA	1840	3	1840	0.00163043	1795	617	1799	0.342968	2.93941e-163	23	23	Artifact (6)
IT_12	2	25464487	G	GC	DNMT3A	ENST00000264709	frameshift_variant	gtg/gtgG|p.Arg676fs/c.2025dupG	4815	690	4822	0.143094	1	1	0	0	1	1	0	0	4	NO	NO	NO	NA	NA	NO	NO	NO	NO	NO	NO	NA	NA	28.22	NA	2525	0	2525	0	2290	690	2297	0.300392	1.77643e-202	23	23	Artifact (5)
IT_13	2	25464487	G	GC	DNMT3A	ENST00000264709	frameshift_variant	gtg/gtGg|p.Arg676fs/c.2024_2025insG	2138	110	2139	0.0514259	0	0	0	0	1	0	0	0	1	NO	NO	NO	NA	NA	NO	NO	NO	NO	NO	NO	NA	NA	29.35	NA	1094	0	1095	0	1044	110	1044	0.105364	1.24451e-33	23	23	Artifact (8)
IT_14	2	25464487	G	GC	DNMT3A	ENST00000264709	frameshift_variant	gtg/gtGg|p.Arg676fs/c.2024_2025insG	2165	137	2167	0.063221	0	0	0	0	1	1	0	0	2	NO	NO	NO	NA	NA	NO	NO	NO	NO	NO	NO	NA	NA	28.18	NA	1133	0	1133	0	1032	137	1034	0.132495	7.51422e-43	23	23	Artifact (7)
IT_15	2	25464487	G	GC	DNMT3A	ENST00000264709	frameshift_variant	gtg/gtGg|p.Arg676fs/c.2024_2025insG	3121	102	3126	0.0326296	0	0	0	0	1	0	0	0	1	NO	NO	NO	NA	NA	NO	NO	NO	NO	NO	NO	NA	NA	27.96	NA	1543	0	1545	0	1578	102	1581	0.0645161	5.7892e-30	23	23	Artifact (9)
IT_05	2	25464487	G	GC	DNMT3A	ENST00000264709	frameshift_variant	gtg/gtGg|p.Arg676fs/c.2024_2025insG	6029	148	6034	0.0245277	0	0	0	0	1	0	0	0	1	NO	NO	NO	NA	NA	NO	NO	NO	NO	NO	NO	NA	NA	28.67	NA	3115	3	3118	0.000962155	2914	145	2916	0.0497257	9.39159e-41	23	23	Artifact (9)
IT_06	2	25464487	G	GC	DNMT3A	ENST00000264709	frameshift_variant	gtg/gtGg|p.Arg676fs/c.2024_2025insG	5378	159	5381	0.0295484	0	0	0	0	1	0	0	0	1	NO	NO	NO	NA	NA	NO	NO	NO	NO	NO	NO	NA	NA	28.37	NA	2838	3	2839	0.00105671	2540	156	2542	0.061369	3.0684e-45	23	23	Artifact (9)
IT_17	2	25464487	G	GC	DNMT3A	ENST00000264709	frameshift_variant	gtg/gtGg|p.Arg676fs/c.2024_2025insG	2268	149	2268	0.0656966	0	0	0	0	1	1	0	0	2	NO	NO	NO	NA	NA	NO	NO	NO	NO	NO	NO	NA	NA	27.37	NA	1174	0	1174	0	1094	149	1094	0.136197	9.64384e-46	23	23	Artifact (7)
IT_18	2	25464487	G	GC	DNMT3A	ENST00000264709	frameshift_variant	gtg/gtGg|p.Arg676fs/c.2024_2025insG	3103	202	3108	0.0649936	0	0	0	0	1	1	0	0	2	NO	NO	NO	NA	NA	NO	NO	NO	NO	NO	NO	NA	NA	28.37	NA	1831	5	1832	0.00272926	1272	197	1276	0.154389	3.34334e-65	23	23	Artifact (7)
IT_19	2	25464487	G	GC	DNMT3A	ENST00000264709	frameshift_variant	gtg/gtGg|p.Arg676fs/c.2024_2025insG	12327	506	12334	0.0410248	0	0	0	0	1	1	0	0	2	NO	NO	NO	NA	NA	NO	NO	NO	NO	NO	NO	NA	NA	29.73	NA	7069	15	7075	0.00212014	5258	491	5259	0.0933638	1.91637e-152	23	23	Artifact (7)
IT_20	2	25464487	G	GC	DNMT3A	ENST00000264709	frameshift_variant	gtg/gtGg|p.Arg676fs/c.2024_2025insG	2900	167	2903	0.0575267	0	0	0	0	1	1	0	0	2	NO	NO	NO	NA	NA	NO	NO	NO	NO	NO	NO	NA	NA	29.53	NA	1574	1	1574	0.000635324	1326	166	1329	0.124906	6.97175e-53	23	23	Artifact (7)
IT_21	2	25464487	G	GC	DNMT3A	ENST00000264709	frameshift_variant	gtg/gtGg|p.Arg676fs/c.2024_2025insG	3076	103	3078	0.0334633	0	0	0	0	1	0	0	0	1	NO	NO	NO	NA	NA	NO	NO	NO	NO	NO	NO	NA	NA	29.08	NA	1400	0	1400	0	1676	103	1678	0.0613826	3.04581e-27	23	23	Artifact (9)
IT_22	2	25464487	G	GC	DNMT3A	ENST00000264709	frameshift_variant	gtg/gtgG|p.Arg676fs/c.2025dupG	6701	755	6706	0.112586	0	1	0	0	1	1	0	0	3	NO	NO	NO	NA	NA	NO	NO	NO	NO	NO	NO	NA	NA	28.83	NA	3579	1	3581	0.000279252	3122	754	3125	0.24128	2.89896e-229	23	23	Artifact (6)
IT_09	2	25464494	G	GC	DNMT3A	ENST00000264709	frameshift_variant	gtg/gtgG|p.Met674fs/c.2016dupG	4415	56	4419	0.0126726	0	0	0	0	1	0	0	0	1	NO	NO	NO	NO	O	NO	NO	NO	NO	NO	NO	NA	NA	26.89	NA	2130	52	2134	0.0243674	2285	4	2285	0.00175055	2.32556e-12	5	5	Artifact (8)
IT_11	2	25464494	G	GC	DNMT3A	ENST00000264709	frameshift_variant	gtg/gtgG|p.Met674fs/c.2016dupG	3646	44	3650	0.0120548	0	0	0	0	1	0	0	0	1	NO	NO	NO	NO	O	NO	NO	NO	NO	NO	NO	NA	NA	27.5	NA	1831	43	1834	0.023446	1815	1	1816	0.000550661	4.94867e-12	5	5	Artifact (8)
IT_17	2	25464494	G	GC	DNMT3A	ENST00000264709	frameshift_variant	gtg/gtgG|p.Met674fs/c.2016dupG	2251	31	2254	0.0137533	0	0	0	0	1	0	0	0	1	NO	NO	NO	NO	O	NO	NO	NO	NO	NO	NO	NA	NA	27.47	NA	1150	29	1153	0.0251518	1101	2	1101	0.00181653	5.63768e-07	5	5	Artifact (8)
IT_18	2	25464494	G	GC	DNMT3A	ENST00000264709	frameshift_variant	gtg/gtgG|p.Met674fs/c.2016dupG	3101	62	3104	0.0199742	0	0	0	0	1	0	0	0	1	NO	NO	NO	NO	O	NO	NO	NO	NO	NO	NO	NA	NA	25.78	NA	1813	59	1816	0.032489	1288	3	1288	0.00232919	8.95473e-11	5	5	Artifact (8)
IT_16	2	25464498	A	C	DNMT3A	ENST00000264709	missense_variant	gTg/gGg|p.Val672Gly/c.2015T>G	151	25	176	0.142045	0	0	0	0	1	0	0	0	1	NO	NO	NO	NO	O	NO	NO	NO	NO	NO	NO	-6.768	Deleterious	27.79	24.44	84	0	84	0	67	25	92	0.271739	1.59091e-08	2	2	Artifact (1)
IT_11	2	25464502	T	TC	DNMT3A	ENST00000264709	frameshift_variant	atc/atcG|p.Thr671fs/c.2010_2011insG	3271	60	3274	0.0183262	0	0	0	0	1	0	0	0	1	NO	NO	NO	NO	O	NO	NO	NO	NO	NO	NO	NA	NA	30.82	NA	1643	3	1644	0.00182482	1628	57	1630	0.0349693	4.88257e-14	5	5	Artifact (8)
IT_12	2	25464502	T	TC	DNMT3A	ENST00000264709	frameshift_variant	atc/atcG|p.Thr671fs/c.2010_2011insG	3748	58	3759	0.0154296	0	0	0	0	1	0	0	0	1	NO	NO	NO	NO	O	NO	NO	NO	NO	NO	NO	NA	NA	31	NA	2021	1	2025	0.000493827	1727	57	1734	0.032872	3.42576e-18	5	5	Artifact (8)
IT_18	2	25464502	T	TC	DNMT3A	ENST00000264709	frameshift_variant	atc/atcG|p.Thr671fs/c.2010_2011insG	2554	35	2558	0.0136826	0	0	0	0	1	0	0	0	1	NO	NO	NO	NO	O	NO	NO	NO	NO	NO	NO	NA	NA	28.28	NA	1567	1	1568	0.000637755	987	34	990	0.0343434	2.84042e-13	5	5	Artifact (8)
IT_13	2	25464522	T	TC	DNMT3A	ENST00000264709	frameshift_variant	tcg/tcGg|p.Glu664fs/c.1988_1989insG	1703	26	1707	0.0152314	0	0	0	0	1	0	0	0	1	NO	NO	NO	NO	O	NO	NO	NO	NO	NO	NO	NA	NA	28.56	NA	898	25	900	0.0277778	805	1	807	0.00123916	2.62322e-06	4	4	Artifact (8)
IT_14	2	25464522	T	TC	DNMT3A	ENST00000264709	frameshift_variant	tcg/tcGg|p.Glu664fs/c.1988_1989insG	1330	21	1335	0.0157303	0	0	0	0	1	0	0	0	1	NO	NO	NO	NO	O	NO	NO	NO	NO	NO	NO	NA	NA	28.46	NA	724	19	728	0.0260989	606	2	607	0.00329489	0.000646509	4	4	Artifact (8)
IT_15	2	25464522	T	TC	DNMT3A	ENST00000264709	frameshift_variant	tcg/tcGg|p.Glu664fs/c.1988_1989insG	1296	22	1297	0.0169622	0	0	0	0	1	0	0	0	1	NO	NO	NO	NO	O	NO	NO	NO	NO	NO	NO	NA	NA	28.1	NA	678	20	679	0.0294551	618	2	618	0.00323625	0.000294862	4	4	Artifact (8)
IT_17	2	25464522	T	TC	DNMT3A	ENST00000264709	frameshift_variant	tcg/tcGg|p.Glu664fs/c.1988_1989insG	1465	20	1468	0.013624	0	0	0	0	1	0	0	0	1	NO	NO	NO	NO	O	NO	NO	NO	NO	NO	NO	NA	NA	29.03	NA	762	16	764	0.0209424	703	4	704	0.00568182	0.0131183	4	4	Artifact (7)
IT_24	2	25464526	AG	A	DNMT3A	ENST00000264709	frameshift_variant	gcc/|p.Ser663fs/c.1985delC	477	27	508	0.0531496	0	0	0	0	1	0	0	0	1	NO	NO	NO	NO	O	NO	NO	NO	NO	NO	NO	NA	NA	23.39	NA	228	26	258	0.100775	249	1	250	0.004	2.2686e-07	11	11	Artifact (5)
IT_11	2	25464526	AG	A	DNMT3A	ENST00000264709	frameshift_variant	gcc/|p.Ser663fs/c.1985delC	3231	61	3299	0.0184905	0	0	0	0	1	0	0	0	1	NO	NO	NO	NO	O	NO	NO	NO	NO	NO	NO	NA	NA	26.36	NA	1571	61	1639	0.0372178	1660	0	1660	0	1.4477e-19	11	11	Artifact (8)
IT_12	2	25464526	AG	A	DNMT3A	ENST00000264709	frameshift_variant	gcc/|p.Ser663fs/c.1985delC	3704	58	3776	0.0153602	0	0	0	0	1	0	0	0	1	NO	NO	NO	NO	O	NO	NO	NO	NO	NO	NO	NA	NA	26.14	NA	1939	58	2010	0.0288557	1765	0	1766	0	7.88324e-17	11	11	Artifact (8)
IT_14	2	25464526	AG	A	DNMT3A	ENST00000264709	frameshift_variant	gcc/|p.Ser663fs/c.1985delC	1308	24	1335	0.0179775	0	0	0	0	1	0	0	0	1	NO	NO	NO	NO	O	NO	NO	NO	NO	NO	NO	NA	NA	25.06	NA	694	24	721	0.0332871	614	0	614	0	5.01992e-07	11	11	Artifact (8)
IT_15	2	25464526	AG	A	DNMT3A	ENST00000264709	frameshift_variant	gcc/|p.Ser663fs/c.1985delC	1252	30	1289	0.0232739	0	0	0	0	1	0	0	0	1	NO	NO	NO	NO	O	NO	NO	NO	NO	NO	NO	NA	NA	25.52	NA	635	30	671	0.0447094	617	0	618	0	2.23678e-09	11	11	Artifact (6)
IT_17	2	25464526	AG	A	DNMT3A	ENST00000264709	frameshift_variant	gcc/|p.Ser663fs/c.1985delC	1425	34	1467	0.0231766	0	0	0	0	1	0	0	0	1	NO	NO	NO	NO	O	NO	NO	NO	NO	NO	NO	NA	NA	25.94	NA	721	33	762	0.0433071	704	1	705	0.00141844	4.7105e-09	11	11	Artifact (6)
IT_18	2	25464526	AG	A	DNMT3A	ENST00000264709	frameshift_variant	gcc/|p.Ser663fs/c.1985delC	2504	43	2552	0.0168495	0	0	0	0	1	0	0	0	1	NO	NO	NO	NO	O	NO	NO	NO	NO	NO	NO	NA	NA	26.24	NA	1485	43	1532	0.0280679	1019	0	1020	0	2.69579e-10	11	11	Artifact (8)
IT_22	2	25464526	AG	A	DNMT3A	ENST00000264709	frameshift_variant	gcc/|p.Ser663fs/c.1985delC	4359	53	4419	0.0119937	0	0	0	0	1	0	0	0	1	NO	NO	NO	NO	O	NO	NO	NO	NO	NO	NO	NA	NA	26.13	NA	2469	52	2526	0.0205859	1890	1	1893	0.000528262	7.71862e-12	11	11	Artifact (8)
IT_14	2	25464550	T	TC	DNMT3A	ENST00000264709	frameshift_variant	ggc/ggcG|p.Ile655fs/c.1962_1963insG	1310	22	1314	0.0167428	0	0	0	0	1	0	0	0	1	NO	NO	NO	NA	NA	NO	NO	NO	NO	NO	NO	NA	NA	29.85	NA	690	0	692	0	620	22	622	0.0353698	8.7976e-08	1	1	Artifact (6)
IT_23	2	25464551	GC	G	DNMT3A	ENST00000264709	frameshift_variant	ggc/|p.Gly654fs/c.1960delG	2118	197	2323	0.0848041	0	0	0	0	1	1	0	0	2	NO	NO	NO	NA	NA	NO	NO	NO	NO	NO	NO	NA	NA	24.14	NA	1005	197	1208	0.163079	1113	0	1115	0	2.15433e-60	24	24	Artifact (7)
IT_24	2	25464551	GC	G	DNMT3A	ENST00000264709	frameshift_variant	ggc/|p.Gly654fs/c.1960delG	399	91	493	0.184584	0	0	0	0	1	1	0	0	2	NO	NO	NO	NA	NA	NO	NO	NO	NO	NO	NO	NA	NA	23.71	NA	139	91	233	0.390558	260	0	260	0	9.443e-36	24	24	Artifact (6)
IT_01	2	25464551	GC	G	DNMT3A	ENST00000264709	frameshift_variant	ggc/|p.Gly654fs/c.1960delG	2092	208	2301	0.0903955	0	0	0	0	1	1	0	0	2	NO	NO	NO	NA	NA	NO	NO	NO	NO	NO	NO	NA	NA	25.26	NA	980	207	1187	0.174389	1112	1	1114	0.000897666	3.71223e-62	24	24	Artifact (7)
IT_02	2	25464551	GC	G	DNMT3A	ENST00000264709	frameshift_variant	ggc/|p.Gly654fs/c.1960delG	547	41	588	0.0697279	0	0	0	0	1	0	0	0	1	NO	NO	NO	NA	NA	NO	NO	NO	NO	NO	NO	NA	NA	25.21	NA	264	40	304	0.131579	283	1	284	0.00352113	2.11191e-11	24	24	Artifact (8)
IT_03	2	25464551	GC	G	DNMT3A	ENST00000264709	frameshift_variant	ggc/|p.Gly654fs/c.1960delG	495	38	534	0.071161	0	0	0	0	1	0	0	0	1	NO	NO	NO	NA	NA	NO	NO	NO	NO	NO	NO	NA	NA	25.01	NA	262	38	301	0.126246	233	0	233	0	2.18404e-10	24	24	Artifact (8)
IT_04	2	25464551	GC	G	DNMT3A	ENST00000264709	frameshift_variant	ggc/|p.Gly654fs/c.1960delG	511	35	547	0.0639854	0	0	0	0	1	0	0	0	1	NO	NO	NO	NA	NA	NO	NO	NO	NO	NO	NO	NA	NA	24.31	NA	259	34	294	0.115646	252	1	253	0.00395257	5.04474e-09	24	24	Artifact (8)
IT_07	2	25464551	GC	G	DNMT3A	ENST00000264709	frameshift_variant	ggc/|p.Gly654fs/c.1960delG	1490	77	1569	0.0490758	0	0	0	0	1	0	0	0	1	NO	NO	NO	NA	NA	NO	NO	NO	NO	NO	NO	NA	NA	24.66	NA	739	77	818	0.094132	751	0	751	0	2.76985e-23	24	24	Artifact (9)
IT_08	2	25464551	GC	G	DNMT3A	ENST00000264709	frameshift_variant	ggc/|p.Gly654fs/c.1960delG	1234	54	1292	0.0417957	0	0	0	0	1	0	0	0	1	NO	NO	NO	NA	NA	NO	NO	NO	NO	NO	NO	NA	NA	24.61	NA	634	54	691	0.0781476	600	0	601	0	7.39855e-16	24	24	Artifact (9)
IT_09	2	25464551	GC	G	DNMT3A	ENST00000264709	frameshift_variant	ggc/|p.Gly654fs/c.1960delG	2700	198	2901	0.0682523	0	0	0	0	1	1	0	0	2	NO	NO	NO	NA	NA	NO	NO	NO	NO	NO	NO	NA	NA	24.61	NA	1248	197	1448	0.13605	1452	1	1453	0.000688231	2.35442e-61	24	24	Artifact (7)
IT_10	2	25464551	GC	G	DNMT3A	ENST00000264709	frameshift_variant	ggc/|p.Gly654fs/c.1960delG	2631	165	2803	0.0588655	0	0	0	0	1	1	0	0	2	NO	NO	NO	NA	NA	NO	NO	NO	NO	NO	NO	NA	NA	25.24	NA	1180	162	1348	0.120178	1451	3	1455	0.00206186	2.53744e-49	24	24	Artifact (7)
IT_11	2	25464551	GC	G	DNMT3A	ENST00000264709	frameshift_variant	ggc/|p.Gly654fs/c.1960delG	3171	112	3290	0.0340426	0	0	0	0	1	0	0	0	1	NO	NO	NO	NA	NA	NO	NO	NO	NO	NO	NO	NA	NA	27.83	NA	1501	110	1617	0.0680272	1670	2	1673	0.00119546	2.43633e-32	24	24	Artifact (9)
IT_12	2	25464551	GC	G	DNMT3A	ENST00000264709	frameshift_variant	ggc/|p.Gly654fs/c.1960delG	3612	141	3758	0.03752	0	0	0	0	1	0	0	0	1	NO	NO	NO	NA	NA	NO	NO	NO	NO	NO	NO	NA	NA	27.99	NA	1833	141	1978	0.0712841	1779	0	1780	0	4.62971e-41	24	24	Artifact (9)
IT_13	2	25464551	GC	G	DNMT3A	ENST00000264709	frameshift_variant	ggc/|p.Gly654fs/c.1960delG	1539	138	1678	0.0822408	0	0	0	0	1	1	0	0	2	NO	NO	NO	NA	NA	NO	NO	NO	NO	NO	NO	NA	NA	27.33	NA	709	137	847	0.161747	830	1	831	0.00120337	4.08372e-42	24	24	Artifact (7)
IT_14	2	25464551	GC	G	DNMT3A	ENST00000264709	frameshift_variant	ggc/|p.Gly654fs/c.1961delG	1181	132	1314	0.100457	0	0	0	0	0	1	0	0	1	NO	NO	NO	NA	NA	NO	NO	NO	NO	NO	NO	NA	NA	27.55	NA	558	132	691	0.191027	623	0	623	0	2.33386e-40	24	24	Artifact (7)
IT_15	2	25464551	GC	G	DNMT3A	ENST00000264709	frameshift_variant	ggc/|p.Gly654fs/c.1960delG	1174	90	1267	0.0710339	0	0	0	0	1	1	0	0	2	NO	NO	NO	NA	NA	NO	NO	NO	NO	NO	NO	NA	NA	25.38	NA	549	89	641	0.138846	625	1	626	0.00159744	8.02934e-27	24	24	Artifact (7)
IT_05	2	25464551	GC	G	DNMT3A	ENST00000264709	frameshift_variant	ggc/|p.Gly654fs/c.1960delG	2765	140	2910	0.04811	0	0	0	0	1	0	0	0	1	NO	NO	NO	NA	NA	NO	NO	NO	NO	NO	NO	NA	NA	25.28	NA	1429	140	1574	0.0889454	1336	0	1336	0	1.92516e-39	24	24	Artifact (9)
IT_06	2	25464551	GC	G	DNMT3A	ENST00000264709	frameshift_variant	ggc/|p.Gly654fs/c.1960delG	3022	156	3180	0.0490566	0	0	0	0	1	1	0	0	2	NO	NO	NO	NA	NA	NO	NO	NO	NO	NO	NO	NA	NA	25.67	NA	1604	156	1761	0.088586	1418	0	1419	0	7.09602e-42	24	24	Artifact (8)
IT_17	2	25464551	GC	G	DNMT3A	ENST00000264709	frameshift_variant	ggc/|p.Gly654fs/c.1960delG	1282	145	1432	0.101257	0	0	0	0	1	1	0	0	2	NO	NO	NO	NA	NA	NO	NO	NO	NO	NO	NO	NA	NA	26.95	NA	571	145	721	0.20111	711	0	711	0	1.4957e-47	24	24	Artifact (6)
IT_18	2	25464551	GC	G	DNMT3A	ENST00000264709	frameshift_variant	ggc/|p.Gly654fs/c.1960delG	2153	310	2469	0.125557	0	0	0	0	1	1	0	0	2	NO	NO	NO	NA	NA	NO	NO	NO	NO	NO	NO	NA	NA	26.87	NA	1117	310	1433	0.216329	1036	0	1036	0	4.24435e-81	24	24	Artifact (6)
IT_19	2	25464551	GC	G	DNMT3A	ENST00000264709	frameshift_variant	ggc/|p.Gly654fs/c.1960delG	6114	464	6596	0.0703457	0	0	0	0	1	1	0	0	2	NO	NO	NO	NA	NA	NO	NO	NO	NO	NO	NO	NA	NA	27.37	NA	3995	463	4475	0.103464	2119	1	2121	0.000471476	3.37257e-80	24	24	Artifact (7)
IT_20	2	25464551	GC	G	DNMT3A	ENST00000264709	frameshift_variant	ggc/|p.Gly654fs/c.1960delG	1393	81	1476	0.054878	0	0	0	0	1	0	0	0	1	NO	NO	NO	NA	NA	NO	NO	NO	NO	NO	NO	NA	NA	27.03	NA	791	81	874	0.0926773	602	0	602	0	9.61706e-20	24	24	Artifact (8)
IT_21	2	25464551	GC	G	DNMT3A	ENST00000264709	frameshift_variant	ggc/|p.Gly654fs/c.1960delG	481	46	527	0.0872865	0	0	0	0	1	1	0	0	2	NO	NO	NO	NA	NA	NO	NO	NO	NO	NO	NO	NA	NA	27.62	NA	231	46	277	0.166065	250	0	250	0	2.76935e-14	24	24	Artifact (7)
IT_22	2	25464551	GC	G	DNMT3A	ENST00000264709	frameshift_variant	ggc/|p.Gly654fs/c.1960delG	4022	340	4371	0.0777854	0	0	0	0	1	1	0	0	2	NO	NO	NO	NA	NA	NO	NO	NO	NO	NO	NO	NA	NA	28.01	NA	2106	340	2451	0.138719	1916	0	1920	0	6.30681e-91	24	24	Artifact (7)
IT_23	2	25464574	GC	G	DNMT3A	ENST00000264709	frameshift_variant	ggg/|p.Leu647fs/c.1938delG	2042	262	2306	0.113617	0	1	0	0	1	1	0	0	3	NO	NO	NO	NO	O	NO	NO	NO	NO	NO	NO	NA	NA	23.12	NA	923	261	1186	0.220067	1119	1	1120	0.000892857	8.54699e-81	23	23	Artifact (6)
IT_24	2	25464574	GC	G	DNMT3A	ENST00000264709	frameshift_variant	ggg/|p.Leu647fs/c.1938delG	313	164	479	0.34238	1	1	0	0	1	1	0	1	5	NO	NO	NO	NO	O	NO	NO	NO	NO	NO	NO	NA	NA	18	NA	49	163	213	0.765258	264	1	266	0.0037594	1.30207e-81	23	23	Artifact (4)
IT_02	2	25464574	GC	G	DNMT3A	ENST00000264709	frameshift_variant	ggg/|p.Leu647fs/c.1938delG	378	199	581	0.342513	1	1	0	0	1	1	0	0	4	NO	NO	NO	NO	O	NO	NO	NO	NO	NO	NO	NA	NA	22.39	NA	94	199	297	0.670034	284	0	284	0	3.75381e-82	23	23	Artifact (5)
IT_03	2	25464574	GC	G	DNMT3A	ENST00000264709	frameshift_variant	ggg/|p.Leu647fs/c.1938delG	350	172	523	0.328872	1	1	0	0	1	1	0	0	4	NO	NO	NO	NO	O	NO	NO	NO	NO	NO	NO	NA	NA	23.02	NA	119	171	291	0.587629	231	1	232	0.00431034	1.21238e-56	23	23	Artifact (5)
IT_04	2	25464574	GC	G	DNMT3A	ENST00000264709	frameshift_variant	ggg/|p.Leu647fs/c.1938delG	364	171	536	0.31903	1	1	0	0	1	1	0	0	4	NO	NO	NO	NO	O	NO	NO	NO	NO	NO	NO	NA	NA	20.52	NA	113	169	283	0.597173	251	2	253	0.00790514	4.24948e-59	23	23	Artifact (5)
IT_07	2	25464574	GC	G	DNMT3A	ENST00000264709	frameshift_variant	ggg/|p.Leu647fs/c.1938delG	1387	172	1562	0.110115	0	1	0	0	1	1	0	0	3	NO	NO	NO	NO	O	NO	NO	NO	NO	NO	NO	NA	NA	23.49	NA	632	170	805	0.21118	755	2	757	0.00264201	2.31501e-50	23	23	Artifact (6)
IT_08	2	25464574	GC	G	DNMT3A	ENST00000264709	frameshift_variant	ggg/|p.Leu647fs/c.1938delG	1143	138	1288	0.107143	0	1	0	0	1	1	0	0	3	NO	NO	NO	NO	O	NO	NO	NO	NO	NO	NO	NA	NA	23.44	NA	540	137	681	0.201175	603	1	607	0.00164745	7.8439e-40	23	23	Artifact (6)
IT_09	2	25464574	GC	G	DNMT3A	ENST00000264709	frameshift_variant	ggg/|p.Leu647fs/c.1938delG	2223	659	2893	0.227791	1	1	0	0	1	1	0	0	4	NO	NO	NO	NO	O	NO	NO	NO	NO	NO	NO	NA	NA	21.82	NA	760	658	1428	0.460784	1463	1	1465	0.000682594	3.67324e-245	23	23	Artifact (5)
IT_10	2	25464574	GC	G	DNMT3A	ENST00000264709	frameshift_variant	ggg/|p.Leu647fs/c.1938delG	2127	638	2772	0.230159	1	1	0	0	1	1	0	0	4	NO	NO	NO	NO	O	NO	NO	NO	NO	NO	NO	NA	NA	22.07	NA	666	633	1305	0.485057	1461	5	1467	0.00340832	1.11114e-244	23	23	Artifact (5)
IT_11	2	25464574	GC	G	DNMT3A	ENST00000264709	frameshift_variant	ggg/|p.Leu647fs/c.1937delG	3116	156	3281	0.0475465	0	0	0	0	1	1	0	0	2	NO	NO	NO	NO	O	NO	NO	NO	NO	NO	NO	NA	NA	24.36	NA	1433	156	1595	0.0978056	1683	0	1686	0	1.89435e-51	23	23	Artifact (8)
IT_12	2	25464574	GC	G	DNMT3A	ENST00000264709	frameshift_variant	ggg/|p.Leu647fs/c.1937delG	3528	206	3744	0.0550214	0	0	0	0	1	1	0	0	2	NO	NO	NO	NO	O	NO	NO	NO	NO	NO	NO	NA	NA	24.6	NA	1746	205	1956	0.104806	1782	1	1788	0.000559284	8.44241e-59	23	23	Artifact (7)
IT_13	2	25464574	GC	G	DNMT3A	ENST00000264709	frameshift_variant	ggg/|p.Leu647fs/c.1938delG	1467	177	1651	0.107208	0	1	0	0	1	1	0	0	3	NO	NO	NO	NO	O	NO	NO	NO	NO	NO	NO	NA	NA	23.32	NA	629	176	812	0.216749	838	1	839	0.0011919	4.58687e-58	23	23	Artifact (6)
IT_14	2	25464574	GC	G	DNMT3A	ENST00000264709	frameshift_variant	ggg/|p.Leu647fs/c.1938delG	1159	132	1299	0.101617	0	1	0	0	1	1	0	0	3	NO	NO	NO	NO	O	NO	NO	NO	NO	NO	NO	NA	NA	23.59	NA	523	132	663	0.199095	636	0	636	0	9.11246e-43	23	23	Artifact (6)
IT_15	2	25464574	GC	G	DNMT3A	ENST00000264709	frameshift_variant	ggg/|p.Leu647fs/c.1938delG	1043	181	1225	0.147755	0	1	0	0	1	1	0	0	3	NO	NO	NO	NO	O	NO	NO	NO	NO	NO	NO	NA	NA	21.88	NA	405	181	586	0.308874	638	0	639	0	4.36764e-66	23	23	Artifact (6)
IT_16	2	25464574	GC	G	DNMT3A	ENST00000264709	frameshift_variant	ggg/|p.Leu647fs/c.1938delG	112	22	134	0.164179	0	1	0	0	1	1	0	0	3	NO	NO	NO	NO	O	NO	NO	NO	NO	NO	NO	NA	NA	22.8	NA	49	22	71	0.309859	63	0	63	0	1.44395e-07	23	23	Artifact (6)
IT_05	2	25464574	GC	G	DNMT3A	ENST00000264709	frameshift_variant	ggg/|p.Leu647fs/c.1938delG	1892	990	2889	0.342679	1	1	0	0	1	1	0	0	4	NO	NO	NO	NO	O	NO	NO	NO	NO	NO	NO	NA	NA	21.06	NA	551	990	1548	0.639535	1341	0	1341	0	0	23	23	Artifact (5)
IT_06	2	25464574	GC	G	DNMT3A	ENST00000264709	frameshift_variant	ggg/|p.Leu647fs/c.1938delG	2187	970	3166	0.30638	1	1	0	0	1	1	0	0	4	NO	NO	NO	NO	O	NO	NO	NO	NO	NO	NO	NA	NA	20.55	NA	758	967	1734	0.55767	1429	3	1432	0.00209497	0	23	23	Artifact (5)
IT_17	2	25464574	GC	G	DNMT3A	ENST00000264709	frameshift_variant	ggg/|p.Leu647fs/c.1938delG	1195	201	1407	0.142857	0	1	0	0	1	1	0	0	3	NO	NO	NO	NO	O	NO	NO	NO	NO	NO	NO	NA	NA	24.03	NA	480	200	690	0.289855	715	1	717	0.0013947	8.72121e-69	23	23	Artifact (6)
IT_18	2	25464574	GC	G	DNMT3A	ENST00000264709	frameshift_variant	ggg/|p.Leu647fs/c.1938delG	1966	440	2438	0.180476	1	1	0	0	0	1	0	0	3	NO	NO	NO	NO	O	NO	NO	NO	NO	NO	NO	NA	NA	24.65	NA	915	438	1384	0.316474	1051	2	1054	0.00189753	7.54575e-122	23	23	Artifact (6)
IT_19	2	25464574	GC	G	DNMT3A	ENST00000264709	frameshift_variant	ggg/|p.Leu647fs/c.1938delG	5778	736	6531	0.112693	0	1	0	0	1	1	0	0	3	NO	NO	NO	NO	O	NO	NO	NO	NO	NO	NO	NA	NA	27.15	NA	3630	734	4381	0.167542	2148	2	2150	0.000930233	1.69545e-133	23	23	Artifact (6)
IT_20	2	25464574	GC	G	DNMT3A	ENST00000264709	frameshift_variant	ggg/|p.Leu647fs/c.1938delG	1313	143	1459	0.0980123	0	1	0	0	1	1	0	0	3	NO	NO	NO	NO	O	NO	NO	NO	NO	NO	NO	NA	NA	26.34	NA	708	143	854	0.167447	605	0	605	0	2.07472e-36	23	23	Artifact (7)
IT_21	2	25464574	GC	G	DNMT3A	ENST00000264709	frameshift_variant	ggg/|p.Leu647fs/c.1938delG	471	50	526	0.095057	0	1	0	0	1	1	0	0	3	NO	NO	NO	NO	O	NO	NO	NO	NO	NO	NO	NA	NA	25.05	NA	217	49	271	0.180812	254	1	255	0.00392157	1.38104e-14	23	23	Artifact (7)
IT_22	2	25464574	GC	G	DNMT3A	ENST00000264709	frameshift_variant	ggg/|p.Leu647fs/c.1937delG	3989	342	4347	0.0786749	0	0	0	0	1	1	0	0	2	NO	NO	NO	NO	O	NO	NO	NO	NO	NO	NO	NA	NA	25.24	NA	2058	340	2411	0.14102	1931	2	1936	0.00103306	1.2524e-88	23	23	Artifact (7)
IT_23	2	25466775	AT	A	DNMT3A	ENST00000264709	frameshift_variant	gga/|p.Ile643fs/c.1926delA	2079	29	2108	0.0137571	0	0	0	0	1	0	0	0	1	NO	NO	NO	NO	O	NO	NO	NO	NO	NO	NO	NA	NA	23.17	NA	873	6	879	0.00682594	1206	23	1229	0.0187144	0.0223602	20	20	Artifact (10)
IT_10	2	25466775	AT	A	DNMT3A	ENST00000264709	frameshift_variant	gga/|p.Ile643fs/c.1926delA	883	24	910	0.0263736	0	0	0	0	1	0	0	0	1	NO	NO	NO	NO	O	NO	NO	NO	NO	NO	NO	NA	NA	23.52	NA	447	1	450	0.00222222	436	23	460	0.05	2.37508e-06	20	20	Artifact (9)
IT_12	2	25466775	AT	A	DNMT3A	ENST00000264709	frameshift_variant	gga/|p.Ile643fs/c.1926delA	886	22	909	0.0242024	0	0	0	0	1	0	0	0	1	NO	NO	NO	NO	O	NO	NO	NO	NO	NO	NO	NA	NA	24.81	NA	402	1	404	0.00247525	484	21	505	0.0415842	4.43298e-05	20	20	Artifact (9)
IT_15	2	25466775	AT	A	DNMT3A	ENST00000264709	frameshift_variant	gga/|p.Ile643fs/c.1926delA	1464	41	1510	0.0271523	0	0	0	0	1	0	0	0	1	NO	NO	NO	NO	O	NO	NO	NO	NO	NO	NO	NA	NA	24.75	NA	707	1	712	0.00140449	757	40	798	0.0501253	1.3891e-10	20	20	Artifact (9)
IT_16	2	25466775	AT	A	DNMT3A	ENST00000264709	frameshift_variant	gga/|p.Ile643fs/c.1926delA	790	29	819	0.035409	0	0	0	0	1	0	0	0	1	NO	NO	NO	NO	O	NO	NO	NO	NO	NO	NO	NA	NA	24.9	NA	389	1	390	0.0025641	401	28	429	0.0652681	1.40577e-07	20	20	Artifact (9)
IT_17	2	25466775	AT	A	DNMT3A	ENST00000264709	frameshift_variant	gga/|p.Ile643fs/c.1926delA	380	20	401	0.0498753	0	0	0	0	1	0	0	0	1	NO	NO	NO	NO	O	NO	NO	NO	NO	NO	NO	NA	NA	23.24	NA	183	1	185	0.00540541	197	19	216	0.087963	9.21305e-05	20	20	Artifact (9)
IT_18	2	25466775	AT	A	DNMT3A	ENST00000264709	frameshift_variant	atc/|p.Ile643fs/c.1927delA	235	26	261	0.0996169	0	1	0	0	1	1	0	0	3	NO	NO	NO	NO	O	NO	NO	NO	NO	NO	NO	NA	NA	23.04	NA	105	0	105	0	130	26	156	0.166667	7.41191e-07	20	20	Artifact (7)
IT_19	2	25466775	AT	A	DNMT3A	ENST00000264709	frameshift_variant	gga/|p.Ile643fs/c.1926delA	2307	132	2444	0.0540098	0	0	0	0	1	1	0	0	2	NO	NO	NO	NO	O	NO	NO	NO	NO	NO	NO	NA	NA	23.13	NA	950	0	952	0	1357	132	1492	0.0884718	5.38997e-30	20	20	Artifact (7)
IT_20	2	25466775	AT	A	DNMT3A	ENST00000264709	frameshift_variant	gga/|p.Ile643fs/c.1926delA	547	29	576	0.0503472	0	0	0	0	1	0	0	0	1	NO	NO	NO	NO	O	NO	NO	NO	NO	NO	NO	NA	NA	24.32	NA	261	1	262	0.00381679	286	28	314	0.089172	3.77234e-07	20	20	Artifact (8)
IT_21	2	25466775	AT	A	DNMT3A	ENST00000264709	frameshift_variant	gga/|p.Ile643fs/c.1926delA	741	35	781	0.0448143	0	0	0	0	1	0	0	0	1	NO	NO	NO	NO	O	NO	NO	NO	NO	NO	NO	NA	NA	24.37	NA	379	0	380	0	362	35	401	0.0872818	3.5713e-11	20	20	Artifact (9)
IT_22	2	25466775	AT	A	DNMT3A	ENST00000264709	frameshift_variant	atc/|p.Ile643fs/c.1927delA	1198	73	1273	0.0573449	0	0	0	0	0	1	0	0	1	NO	NO	NO	NO	O	NO	NO	NO	NO	NO	NO	NA	NA	22.91	NA	523	1	526	0.00190114	675	72	747	0.0963855	2.06019e-16	20	20	Artifact (8)
IT_23	2	25466796	AC	A	DNMT3A	ENST00000264709	frameshift_variant	cgg/|p.Val636fs/c.1905delG	1987	124	2117	0.0585735	0	0	0	0	1	1	0	0	2	NO	NO	NO	NO	O	NO	NO	NO	1.048e-05	NO	NO	NA	NA	21.85	NA	743	124	871	0.142365	1244	0	1246	0	4.59975e-51	24	32	Artifact (6)
IT_24	2	25466796	AC	A	DNMT3A	ENST00000264709	frameshift_variant	gtg/|p.Val636fs/c.1906delG	403	92	496	0.185484	1	1	0	0	1	1	0	0	4	NO	NO	NO	NO	O	NO	NO	NO	1.048e-05	NO	NO	NA	NA	20.71	NA	132	92	224	0.410714	271	0	272	0	5.22695e-38	24	32	Artifact (5)
IT_01	2	25466796	AC	A	DNMT3A	ENST00000264709	frameshift_variant	gtg/|p.Val636fs/c.1906delG	630	119	749	0.158879	0	1	0	0	1	1	0	0	3	NO	NO	NO	NO	O	NO	NO	NO	1.048e-05	NO	NO	NA	NA	18.58	NA	197	119	316	0.376582	433	0	433	0	3.58027e-52	24	32	Artifact (6)
IT_02	2	25466796	AC	A	DNMT3A	ENST00000264709	frameshift_variant	gtg/|p.Val636fs/c.1906delG	317	59	376	0.156915	1	1	0	0	1	1	0	0	4	NO	NO	NO	NO	O	NO	NO	NO	1.048e-05	NO	NO	NA	NA	20.86	NA	127	58	185	0.313514	190	1	191	0.0052356	2.44464e-19	24	32	Artifact (5)
IT_03	2	25466796	AC	A	DNMT3A	ENST00000264709	frameshift_variant	gtg/|p.Val636fs/c.1906delG	117	29	146	0.19863	1	1	0	0	1	1	0	0	4	NO	NO	NO	NO	O	NO	NO	NO	1.048e-05	NO	NO	NA	NA	20.13	NA	46	29	75	0.386667	71	0	71	0	1.72783e-10	24	32	Artifact (5)
IT_04	2	25466796	AC	A	DNMT3A	ENST00000264709	frameshift_variant	gtg/|p.Val636fs/c.1906delG	125	35	160	0.21875	1	1	0	0	1	1	0	0	4	NO	NO	NO	NO	O	NO	NO	NO	1.048e-05	NO	NO	NA	NA	18.66	NA	41	35	76	0.460526	84	0	84	0	2.25069e-14	24	32	Artifact (5)
IT_07	2	25466796	AC	A	DNMT3A	ENST00000264709	frameshift_variant	cgg/|p.Val636fs/c.1905delG	481	25	507	0.0493097	0	0	0	0	1	0	0	0	1	NO	NO	NO	NO	O	NO	NO	NO	1.048e-05	NO	NO	NA	NA	21	NA	162	25	187	0.13369	319	0	320	0	5.30521e-12	24	32	Artifact (8)
IT_08	2	25466796	AC	A	DNMT3A	ENST00000264709	frameshift_variant	gtg/|p.Val636fs/c.1906delG	343	36	380	0.0947368	0	1	0	0	1	1	0	0	3	NO	NO	NO	NO	O	NO	NO	NO	1.048e-05	NO	NO	NA	NA	20.85	NA	137	36	174	0.206897	206	0	206	0	6.05098e-14	24	32	Artifact (6)
IT_09	2	25466796	AC	A	DNMT3A	ENST00000264709	frameshift_variant	gtg/|p.Val636fs/c.1906delG	595	97	692	0.140173	0	1	0	0	1	1	0	0	3	NO	NO	NO	NO	O	NO	NO	NO	1.048e-05	NO	NO	NA	NA	19.75	NA	194	97	291	0.333333	401	0	401	0	4.99688e-42	24	32	Artifact (6)
IT_10	2	25466796	AC	A	DNMT3A	ENST00000264709	frameshift_variant	gtg/|p.Val636fs/c.1906delG	762	153	916	0.167031	1	1	0	0	1	1	0	0	4	NO	NO	NO	NO	O	NO	NO	NO	1.048e-05	NO	NO	NA	NA	21.46	NA	294	153	448	0.341518	468	0	468	0	2.47712e-55	24	32	Artifact (5)
IT_12	2	25466796	AC	A	DNMT3A	ENST00000264709	frameshift_variant	cgg/|p.Val636fs/c.1905delG	875	41	916	0.0447598	0	0	0	0	1	0	0	0	1	NO	NO	NO	NO	O	NO	NO	NO	1.048e-05	NO	NO	NA	NA	23.48	NA	361	41	402	0.10199	514	0	514	0	6.5009e-16	24	32	Artifact (8)
IT_14	2	25466796	AC	A	DNMT3A	ENST00000264709	frameshift_variant	cgg/|p.Val636fs/c.1905delG	366	21	387	0.0542636	0	0	0	0	1	0	0	0	1	NO	NO	NO	NO	O	NO	NO	NO	1.048e-05	NO	NO	NA	NA	21.48	NA	134	21	155	0.135484	232	0	232	0	1.90008e-09	24	32	Artifact (7)
IT_15	2	25466796	AC	A	DNMT3A	ENST00000264709	frameshift_variant	cgg/|p.Val636fs/c.1905delG	1430	83	1513	0.0548579	0	0	0	0	1	1	0	0	2	NO	NO	NO	NO	O	NO	NO	NO	1.048e-05	NO	NO	NA	NA	23.45	NA	612	83	695	0.119424	818	0	818	0	5.45964e-30	24	32	Artifact (6)
IT_16	2	25466796	AC	A	DNMT3A	ENST00000264709	frameshift_variant	cgg/|p.Val636fs/c.1905delG	765	54	821	0.0657734	0	0	0	0	1	1	0	0	2	NO	NO	NO	NO	O	NO	NO	NO	1.048e-05	NO	NO	NA	NA	23.92	NA	328	54	384	0.140625	437	0	437	0	1.51823e-19	24	32	Artifact (6)
IT_05	2	25466796	AC	A	DNMT3A	ENST00000264709	frameshift_variant	gtg/|p.Val636fs/c.1906delG	1496	120	1621	0.0740284	0	1	0	0	1	1	0	0	3	NO	NO	NO	NO	O	NO	NO	NO	1.048e-05	NO	NO	NA	NA	19.3	NA	508	119	631	0.18859	988	1	990	0.0010101	5.05681e-51	24	32	Artifact (6)
IT_06	2	25466796	AC	A	DNMT3A	ENST00000264709	frameshift_variant	gtg/|p.Val636fs/c.1906delG	1038	138	1180	0.116949	0	1	0	0	1	1	0	0	3	NO	NO	NO	NO	O	NO	NO	NO	1.048e-05	NO	NO	NA	NA	18.45	NA	368	138	510	0.270588	670	0	670	0	1.33055e-56	24	32	Artifact (6)
IT_17	2	25466796	AC	A	DNMT3A	ENST00000264709	frameshift_variant	gtg/|p.Val636fs/c.1906delG	357	44	402	0.109453	0	1	0	0	1	1	0	0	3	NO	NO	NO	NO	O	NO	NO	NO	1.048e-05	NO	NO	NA	NA	22.5	NA	134	44	179	0.24581	223	0	223	0	1.04892e-17	24	32	Artifact (6)
IT_18	2	25466796	AC	A	DNMT3A	ENST00000264709	frameshift_variant	gtg/|p.Val636fs/c.1906delG	237	24	261	0.091954	0	1	0	0	1	1	0	0	3	NO	NO	NO	NO	O	NO	NO	NO	1.048e-05	NO	NO	NA	NA	21.86	NA	80	23	103	0.223301	157	1	158	0.00632911	1.59695e-09	24	32	Artifact (6)
IT_19	2	25466796	AC	A	DNMT3A	ENST00000264709	frameshift_variant	cgg/|p.Val636fs/c.1905delG	2356	99	2457	0.040293	0	0	0	0	1	1	0	0	2	NO	NO	NO	NO	O	NO	NO	NO	1.048e-05	NO	NO	NA	NA	22.75	NA	850	96	946	0.10148	1506	3	1511	0.00198544	3.24294e-37	24	32	Artifact (7)
IT_20	2	25466796	AC	A	DNMT3A	ENST00000264709	frameshift_variant	cgg/|p.Val636fs/c.1905delG	552	25	578	0.0432526	0	0	0	0	1	0	0	0	1	NO	NO	NO	NO	O	NO	NO	NO	1.048e-05	NO	NO	NA	NA	23.06	NA	234	25	260	0.0961538	318	0	318	0	1.02912e-09	24	32	Artifact (8)
IT_21	2	25466796	AC	A	DNMT3A	ENST00000264709	frameshift_variant	cgg/|p.Val636fs/c.1905delG	724	56	781	0.0717029	0	0	0	0	1	1	0	0	2	NO	NO	NO	NO	O	NO	NO	NO	1.048e-05	NO	NO	NA	NA	24.52	NA	320	56	377	0.148541	404	0	404	0	1.81299e-19	24	32	Artifact (6)
IT_22	2	25466796	AC	A	DNMT3A	ENST00000264709	frameshift_variant	cgg/|p.Val636fs/c.1905delG	1221	58	1282	0.0452418	0	0	0	0	1	0	0	0	1	NO	NO	NO	NO	O	NO	NO	NO	1.048e-05	NO	NO	NA	NA	24	NA	465	58	525	0.110476	756	0	757	0	4.15527e-24	24	32	Artifact (8)
IT_23	2	25466803	T	TG	DNMT3A	ENST00000264709	frameshift_variant	ccc/cCcc|p.Ile634fs/c.1897dupC	2117	25	2120	0.0117925	0	0	0	0	1	0	0	0	1	NO	NO	NO	NO	O	NO	NO	NO	NO	NO	NO	NA	NA	30	NA	870	0	870	0	1247	25	1250	0.02	3.13166e-06	19	21	Artifact (12)
IT_01	2	25466803	T	TG	DNMT3A	ENST00000264709	frameshift_variant	ccc/cCcc|p.Ile634fs/c.1897dupC	747	20	748	0.026738	0	0	0	0	1	0	0	0	1	NO	NO	NO	NO	O	NO	NO	NO	NO	NO	NO	NA	NA	27.73	NA	315	0	315	0	432	20	433	0.0461894	2.74858e-05	19	21	Artifact (10)
IT_09	2	25466803	T	TG	DNMT3A	ENST00000264709	frameshift_variant	ccc/cCcc|p.Ile634fs/c.1897dupC	690	26	692	0.0375723	0	0	0	0	1	0	0	0	1	NO	NO	NO	NO	O	NO	NO	NO	NO	NO	NO	NA	NA	27.63	NA	290	0	290	0	400	26	402	0.0646766	1.35292e-06	19	21	Artifact (10)
IT_05	2	25466803	T	TG	DNMT3A	ENST00000264709	frameshift_variant	ccc/cCcc|p.Ile634fs/c.1897dupC	1622	22	1622	0.0135635	0	0	0	0	1	0	0	0	1	NO	NO	NO	NO	O	NO	NO	NO	NO	NO	NO	NA	NA	28.34	NA	631	0	631	0	991	22	991	0.0221998	2.5959e-05	19	21	Artifact (12)
IT_06	2	25466803	T	TG	DNMT3A	ENST00000264709	frameshift_variant	ccc/cCcc|p.Ile634fs/c.1897dupC	1180	28	1180	0.0237288	0	0	0	0	1	0	0	0	1	NO	NO	NO	NO	O	NO	NO	NO	NO	NO	NO	NA	NA	28.34	NA	509	0	509	0	671	28	671	0.0417288	1.92958e-07	19	21	Artifact (10)
IT_19	2	25466803	T	TG	DNMT3A	ENST00000264709	frameshift_variant	ccc/cCcc|p.Ile634fs/c.1897dupC	2458	65	2460	0.0264228	0	0	0	0	1	0	0	0	1	NO	NO	NO	NO	O	NO	NO	NO	NO	NO	NO	NA	NA	28.19	NA	945	2	946	0.00211416	1513	63	1514	0.0416116	3.76349e-11	19	21	Artifact (10)
IT_22	2	25466803	T	TG	DNMT3A	ENST00000264709	frameshift_variant	ccc/cCcc|p.Ile634fs/c.1897dupC	1282	41	1283	0.0319564	0	0	0	0	1	0	0	0	1	NO	NO	NO	NO	O	NO	NO	NO	NO	NO	NO	NA	NA	28.37	NA	525	0	525	0	757	41	758	0.0540897	7.79747e-10	19	21	Artifact (10)
IT_23	2	25466822	T	TG	DNMT3A	ENST00000264709	frameshift_variant	gtc/gtcC|p.Ala628fs/c.1878dupC	2126	24	2126	0.0112888	0	0	0	0	1	0	0	0	1	NO	NO	NO	NO	O	NO	NO	NO	NO	NO	NO	NA	NA	29.24	NA	867	1	867	0.0011534	1259	23	1259	0.0182685	8.39675e-05	22	22	Artifact (11)
IT_24	2	25466822	T	TG	DNMT3A	ENST00000264709	frameshift_variant	gtc/gtcC|p.Ala628fs/c.1878dupC	464	29	466	0.0622318	0	0	0	0	1	0	0	0	1	NO	NO	NO	NO	O	NO	NO	NO	NO	NO	NO	NA	NA	25.97	NA	196	0	197	0	268	29	269	0.107807	3.85587e-07	22	22	Artifact (8)
IT_01	2	25466822	T	TG	DNMT3A	ENST00000264709	frameshift_variant	gtc/gtcC|p.Ala628fs/c.1878dupC	745	36	749	0.0480641	0	0	0	0	1	0	0	0	1	NO	NO	NO	NO	O	NO	NO	NO	NO	NO	NO	NA	NA	28.06	NA	309	0	313	0	436	36	436	0.0825688	1.28574e-08	22	22	Artifact (9)
IT_09	2	25466822	T	TG	DNMT3A	ENST00000264709	frameshift_variant	gtc/gtcC|p.Ala628fs/c.1878dupC	685	27	686	0.0393586	0	0	0	0	1	0	0	0	1	NO	NO	NO	NO	O	NO	NO	NO	NO	NO	NO	NA	NA	28.06	NA	284	0	284	0	401	27	402	0.0671642	8.75838e-07	22	22	Artifact (9)
IT_10	2	25466822	T	TG	DNMT3A	ENST00000264709	frameshift_variant	gtc/gtcC|p.Ala628fs/c.1878dupC	915	24	917	0.0261723	0	0	0	0	1	0	0	0	1	NO	NO	NO	NO	O	NO	NO	NO	NO	NO	NO	NA	NA	29.11	NA	442	0	443	0	473	24	474	0.0506329	1.88718e-07	22	22	Artifact (9)
IT_15	2	25466822	T	TG	DNMT3A	ENST00000264709	frameshift_variant	gtc/gtcC|p.Ala628fs/c.1878dupC	1485	32	1488	0.0215054	0	0	0	0	1	0	0	0	1	NO	NO	NO	NO	O	NO	NO	NO	NO	NO	NO	NA	NA	27.71	NA	672	0	673	0	813	32	815	0.0392638	8.52395e-09	22	22	Artifact (9)
IT_05	2	25466822	T	TG	DNMT3A	ENST00000264709	frameshift_variant	gtc/gtcC|p.Ala628fs/c.1878dupC	1629	109	1629	0.0669122	0	0	0	0	1	1	0	0	2	NO	NO	NO	NO	O	NO	NO	NO	NO	NO	NO	NA	NA	27.23	NA	626	0	626	0	1003	109	1003	0.108674	1.55265e-22	22	22	Artifact (7)
IT_06	2	25466822	T	TG	DNMT3A	ENST00000264709	frameshift_variant	gtc/gtcC|p.Ala628fs/c.1878dupC	1180	116	1181	0.0982218	0	0	0	0	1	1	0	0	2	NO	NO	NO	NO	O	NO	NO	NO	NO	NO	NO	NA	NA	27.5	NA	503	2	503	0.00397614	677	114	678	0.168142	1.84787e-23	22	22	Artifact (7)
IT_19	2	25466822	T	TG	DNMT3A	ENST00000264709	frameshift_variant	gtc/gtcC|p.Ala628fs/c.1878dupC	2471	71	2472	0.0287217	0	0	0	0	1	0	0	0	1	NO	NO	NO	NO	O	NO	NO	NO	NO	NO	NO	NA	NA	28.4	NA	939	1	940	0.00106383	1532	70	1532	0.0456919	1.89411e-13	22	22	Artifact (9)
IT_21	2	25466822	T	TG	DNMT3A	ENST00000264709	frameshift_variant	gtc/gtcC|p.Ala628fs/c.1878dupC	774	22	774	0.0284238	0	0	0	0	1	0	0	0	1	NO	NO	NO	NO	O	NO	NO	NO	NO	NO	NO	NA	NA	28.59	NA	369	1	369	0.00271003	405	21	405	0.0518519	2.99039e-05	22	22	Artifact (9)
IT_22	2	25466822	T	TG	DNMT3A	ENST00000264709	frameshift_variant	gtc/gtcC|p.Ala628fs/c.1878dupC	1283	41	1283	0.0319564	0	0	0	0	1	0	0	0	1	NO	NO	NO	NO	O	NO	NO	NO	NO	NO	NO	NA	NA	28.14	NA	522	0	522	0	761	41	761	0.0538765	8.83224e-10	22	22	Artifact (9)
IT_05	2	25466831	T	TG	DNMT3A	ENST00000264709	frameshift_variant	tac/tacC|p.Pro625fs/c.1869dupC	1629	21	1630	0.0128834	0	0	0	0	1	0	0	0	1	NO	NO	NO	NA	NA	NO	NO	NO	NO	NO	NO	NA	NA	28.65	NA	624	0	625	0	1005	21	1005	0.0208955	5.0733e-05	4	4	Artifact (8)
IT_21	2	25466840	C	CT	DNMT3A	ENST00000264709	frameshift_variant	cca/ccaA|p.Val622fs/c.1860dupA	766	37	766	0.0483029	0	0	0	0	1	0	0	0	1	NO	NO	NO	NO	O	NO	NO	NO	NO	NO	NO	NA	NA	27.05	NA	361	34	361	0.0941828	405	3	405	0.00740741	2.41191e-08	3	3	Artifact (4)
IT_22	2	25466840	C	CT	DNMT3A	ENST00000264709	frameshift_variant	cca/ccaA|p.Val622fs/c.1860dupA	1285	53	1285	0.0412451	0	0	0	0	1	0	0	0	1	NO	NO	NO	NO	O	NO	NO	NO	NO	NO	NO	NA	NA	28.32	NA	515	50	515	0.0970874	770	3	770	0.0038961	2.70909e-16	3	3	Artifact (4)
IT_21	2	25467023	C	CA	DNMT3A	ENST00000264709	frameshift_variant	ttt/tTtt|p.Asp618fs/c.1849dupT	2677	28	2679	0.0104517	0	0	0	0	1	0	0	0	1	NO	NO	NO	NO	O	NO	NO	NO	NO	NO	NO	NA	NA	29.11	NA	1138	22	1139	0.0193152	1539	6	1540	0.0038961	0.000155452	1	9	Artifact (7)
IT_07	2	25467023	CA	C	DNMT3A	ENST00000264709	frameshift_variant	ttt/|p.Phe617fs/c.1850delT	2801	52	2858	0.0181945	0	0	0	0	1	0	0	0	1	NO	NO	NO	NO	O	NO	NO	NO	NO	NO	NO	NA	NA	23.16	NA	1158	2	1162	0.00172117	1643	50	1696	0.0294811	1.25777e-09	8	9	Artifact (9)
IT_08	2	25467023	CA	C	DNMT3A	ENST00000264709	frameshift_variant	ttt/|p.Phe617fs/c.1850delT	2158	54	2214	0.0243902	0	0	0	0	1	0	0	0	1	NO	NO	NO	NO	O	NO	NO	NO	NO	NO	NO	NA	NA	23.2	NA	903	5	908	0.00550661	1255	49	1306	0.0375191	3.29927e-07	8	9	Artifact (7)
IT_09	2	25467023	CA	C	DNMT3A	ENST00000264709	frameshift_variant	ttt/|p.Phe617fs/c.1850delT	3315	48	3366	0.0142602	0	0	0	0	1	0	0	0	1	NO	NO	NO	NO	O	NO	NO	NO	NO	NO	NO	NA	NA	23.99	NA	1388	2	1391	0.00143781	1927	46	1975	0.0232911	5.88527e-09	8	9	Artifact (9)
IT_10	2	25467023	CA	C	DNMT3A	ENST00000264709	frameshift_variant	ttt/|p.Phe617fs/c.1850delT	2974	32	3009	0.0106348	0	0	0	0	1	0	0	0	1	NO	NO	NO	NO	O	NO	NO	NO	NO	NO	NO	NA	NA	24.05	NA	1320	2	1324	0.00151057	1654	30	1685	0.0178042	5.35134e-06	8	9	Artifact (9)
IT_15	2	25467023	CA	C	DNMT3A	ENST00000264709	frameshift_variant	ttt/|p.Phe617fs/c.1850delT	3536	41	3584	0.0114397	0	0	0	0	1	0	0	0	1	NO	NO	NO	NO	O	NO	NO	NO	NO	NO	NO	NA	NA	25.31	NA	1595	3	1600	0.001875	1941	38	1984	0.0191532	2.28138e-07	8	9	Artifact (9)
IT_16	2	25467023	CA	C	DNMT3A	ENST00000264709	frameshift_variant	ttt/|p.Phe617fs/c.1850delT	2893	37	2933	0.0126151	0	0	0	0	1	0	0	0	1	NO	NO	NO	NO	O	NO	NO	NO	NO	NO	NO	NA	NA	25.76	NA	1390	3	1394	0.00215208	1503	34	1539	0.0220923	3.41651e-07	8	9	Artifact (9)
IT_17	2	25467023	CA	C	DNMT3A	ENST00000264709	frameshift_variant	ttt/|p.Phe617fs/c.1850delT	1557	23	1583	0.0145294	0	0	0	0	1	0	0	0	1	NO	NO	NO	NO	O	NO	NO	NO	NO	NO	NO	NA	NA	25.26	NA	636	3	641	0.00468019	921	20	942	0.0212314	0.00862652	8	9	Artifact (8)
IT_23	2	25467028	T	TC	DNMT3A	ENST00000264709	frameshift_variant	cag/caGg|p.Glu616fs/c.1844_1845insG	2953	33	2958	0.0111562	0	0	0	0	1	0	0	0	1	NO	NO	NO	NA	NA	NO	NO	NO	NO	NO	NO	NA	NA	27.77	NA	1186	32	1189	0.0269134	1767	1	1769	0.000565291	5.44703e-12	16	16	Artifact (11)
IT_07	2	25467028	T	TC	DNMT3A	ENST00000264709	frameshift_variant	cag/caGg|p.Glu616fs/c.1844_1845insG	2858	57	2862	0.0199161	0	0	0	0	1	0	0	0	1	NO	NO	NO	NA	NA	NO	NO	NO	NO	NO	NO	NA	NA	26.61	NA	1158	56	1160	0.0482759	1700	1	1702	0.000587544	8.00585e-21	16	16	Artifact (11)
IT_08	2	25467028	T	TC	DNMT3A	ENST00000264709	frameshift_variant	cag/caGg|p.Glu616fs/c.1844_1845insG	2209	59	2211	0.0266848	0	0	0	0	1	0	0	0	1	NO	NO	NO	NA	NA	NO	NO	NO	NO	NO	NO	NA	NA	26.69	NA	899	58	900	0.0644444	1310	1	1311	0.000762777	2.33495e-21	16	16	Artifact (9)
IT_09	2	25467028	T	TC	DNMT3A	ENST00000264709	frameshift_variant	cag/caGg|p.Glu616fs/c.1844_1845insG	3352	73	3356	0.0217521	0	0	0	0	1	0	0	0	1	NO	NO	NO	NA	NA	NO	NO	NO	NO	NO	NO	NA	NA	26.25	NA	1370	69	1374	0.0502183	1982	4	1982	0.00201816	5.45448e-22	16	16	Artifact (9)
IT_10	2	25467028	T	TC	DNMT3A	ENST00000264709	frameshift_variant	cag/caGg|p.Glu616fs/c.1844_1845insG	3003	108	3007	0.0359162	0	0	0	0	1	0	0	0	1	NO	NO	NO	NA	NA	NO	NO	NO	NO	NO	NO	NA	NA	26.18	NA	1312	105	1314	0.0799087	1691	3	1693	0.001772	5.83497e-33	16	16	Artifact (9)
IT_11	2	25467028	T	TC	DNMT3A	ENST00000264709	frameshift_variant	cag/caGg|p.Glu616fs/c.1844_1845insG	2180	106	2188	0.0484461	0	0	0	0	1	0	0	0	1	NO	NO	NO	NA	NA	NO	NO	NO	NO	NO	NO	NA	NA	27.5	NA	669	105	676	0.155325	1511	1	1512	0.000661376	2.11172e-50	16	16	Artifact (9)
IT_12	2	25467028	T	TC	DNMT3A	ENST00000264709	frameshift_variant	cag/caGg|p.Glu616fs/c.1844_1845insG	3232	95	3237	0.0293482	0	0	0	0	1	0	0	0	1	NO	NO	NO	NA	NA	NO	NO	NO	NO	NO	NO	NA	NA	28.09	NA	1145	93	1149	0.0809399	2087	2	2088	0.000957854	2.35195e-38	16	16	Artifact (9)
IT_13	2	25467028	T	TC	DNMT3A	ENST00000264709	frameshift_variant	cag/caGg|p.Glu616fs/c.1844_1845insG	1275	38	1277	0.0297572	0	0	0	0	1	0	0	0	1	NO	NO	NO	NA	NA	NO	NO	NO	NO	NO	NO	NA	NA	27.26	NA	454	38	455	0.0835165	821	0	822	0	2.50291e-17	16	16	Artifact (9)
IT_14	2	25467028	T	TC	DNMT3A	ENST00000264709	frameshift_variant	cag/caGg|p.Glu616fs/c.1844_1845insG	1583	28	1584	0.0176768	0	0	0	0	1	0	0	0	1	NO	NO	NO	NA	NA	NO	NO	NO	NO	NO	NO	NA	NA	27.3	NA	688	28	689	0.0406386	895	0	895	0	1.02118e-10	16	16	Artifact (11)
IT_06	2	25467028	T	TC	DNMT3A	ENST00000264709	frameshift_variant	cag/caGg|p.Glu616fs/c.1844_1845insG	3909	59	3915	0.0150702	0	0	0	0	1	0	0	0	1	NO	NO	NO	NA	NA	NO	NO	NO	NO	NO	NO	NA	NA	27.07	NA	1479	58	1484	0.0390836	2430	1	2431	0.000411353	2.44138e-23	16	16	Artifact (11)
IT_17	2	25467028	T	TC	DNMT3A	ENST00000264709	frameshift_variant	cag/caGg|p.Glu616fs/c.1844_1845insG	1575	23	1577	0.0145847	0	0	0	0	1	0	0	0	1	NO	NO	NO	NA	NA	NO	NO	NO	NO	NO	NO	NA	NA	27.02	NA	631	22	633	0.0347551	944	1	944	0.00105932	3.2296e-08	16	16	Artifact (11)
IT_18	2	25467028	T	TC	DNMT3A	ENST00000264709	frameshift_variant	cag/caGg|p.Glu616fs/c.1844_1845insG	1454	32	1458	0.0219479	0	0	0	0	1	0	0	0	1	NO	NO	NO	NA	NA	NO	NO	NO	NO	NO	NO	NA	NA	27.7	NA	464	27	467	0.0578158	990	5	991	0.00504541	2.043e-09	16	16	Artifact (9)
IT_21	2	25467028	T	TC	DNMT3A	ENST00000264709	frameshift_variant	cag/caGg|p.Glu616fs/c.1844_1845insG	2670	28	2675	0.0104673	0	0	0	0	1	0	0	0	1	NO	NO	NO	NA	NA	NO	NO	NO	NO	NO	NO	NA	NA	27.04	NA	1129	27	1131	0.0238727	1541	1	1544	0.000647668	1.60438e-09	16	16	Artifact (11)
IT_22	2	25467028	T	TC	DNMT3A	ENST00000264709	frameshift_variant	cag/caGg|p.Glu616fs/c.1844_1845insG	3524	69	3533	0.0195301	0	0	0	0	1	0	0	0	1	NO	NO	NO	NA	NA	NO	NO	NO	NO	NO	NO	NA	NA	28.61	NA	1364	68	1368	0.0497076	2160	1	2165	0.000461894	1.09254e-26	16	16	Artifact (11)
IT_24	2	25467064	C	CG	DNMT3A	ENST00000264709	frameshift_variant	tcc/tcCc|p.Arg604fs/c.1808dupC	908	38	908	0.0418502	0	0	0	0	1	0	0	0	1	NO	NO	NO	NA	NA	NO	NO	NO	NO	NO	NO	NA	NA	26.1	NA	343	1	343	0.00291545	565	37	565	0.0654867	8.96411e-07	8	8	Artifact (6)
IT_15	2	25467064	C	CG	DNMT3A	ENST00000264709	frameshift_variant	tcc/tcCc|p.Arg604fs/c.1808dupC	3266	55	3269	0.0168247	0	0	0	0	1	0	0	0	1	NO	NO	NO	NA	NA	NO	NO	NO	NO	NO	NO	NA	NA	27.34	NA	1515	10	1517	0.00659196	1751	45	1752	0.0256849	2.67023e-05	8	8	Artifact (7)
IT_16	2	25467064	C	CG	DNMT3A	ENST00000264709	frameshift_variant	tcc/tcCc|p.Arg604fs/c.1808dupC	2904	33	2905	0.0113597	0	0	0	0	1	0	0	0	1	NO	NO	NO	NA	NA	NO	NO	NO	NO	NO	NO	NA	NA	27.32	NA	1347	10	1347	0.0074239	1557	23	1558	0.0147625	0.0787485	8	8	Artifact (7)
IT_05	2	25467064	C	CG	DNMT3A	ENST00000264709	frameshift_variant	tcc/tcCc|p.Arg604fs/c.1808dupC	3540	59	3543	0.0166526	0	0	0	0	1	0	0	0	1	NO	NO	NO	NA	NA	NO	NO	NO	NO	NO	NO	NA	NA	26	NA	1568	3	1568	0.00191327	1972	56	1975	0.0283544	3.2009e-11	8	8	Artifact (8)
IT_06	2	25467064	C	CG	DNMT3A	ENST00000264709	frameshift_variant	tcc/tcCc|p.Arg604fs/c.1808dupC	2530	31	2531	0.0122481	0	0	0	0	1	0	0	0	1	NO	NO	NO	NA	NA	NO	NO	NO	NO	NO	NO	NA	NA	25.57	NA	1144	4	1144	0.0034965	1386	27	1387	0.0194665	0.000195	8	8	Artifact (8)
IT_17	2	25467064	C	CG	DNMT3A	ENST00000264709	frameshift_variant	tcc/tcCc|p.Arg604fs/c.1808dupC	1067	22	1068	0.0205993	0	0	0	0	1	0	0	0	1	NO	NO	NO	NA	NA	NO	NO	NO	NO	NO	NO	NA	NA	26.62	NA	536	11	536	0.0205224	531	11	532	0.0206767	1	8	8	Artifact (5)
IT_22	2	25467064	C	CG	DNMT3A	ENST00000264709	frameshift_variant	tcc/tcCc|p.Arg604fs/c.1808dupC	2389	31	2394	0.012949	0	0	0	0	1	0	0	0	1	NO	NO	NO	NA	NA	NO	NO	NO	NO	NO	NO	NA	NA	28.29	NA	1170	3	1171	0.00256191	1219	28	1223	0.0228945	5.33116e-06	8	8	Artifact (8)
IT_09	2	25467068	A	AG	DNMT3A	ENST00000264709	frameshift_variant	ccc/cCcc|p.Ser603fs/c.1804dupC	2221	28	2225	0.0125843	0	0	0	0	1	0	0	0	1	NO	NO	NO	NO	O	NO	NO	NO	NO	NO	NO	NA	NA	26.7	NA	978	0	978	0	1243	28	1247	0.0224539	1.43514e-07	15	16	Artifact (12)
IT_10	2	25467068	A	AG	DNMT3A	ENST00000264709	frameshift_variant	ccc/cCcc|p.Ser603fs/c.1804dupC	2056	21	2063	0.0101794	0	0	0	0	1	0	0	0	1	NO	NO	NO	NO	O	NO	NO	NO	NO	NO	NO	NA	NA	26.88	NA	969	0	975	0	1087	21	1088	0.0193015	1.79887e-06	15	16	Artifact (12)
IT_12	2	25467068	A	AG	DNMT3A	ENST00000264709	frameshift_variant	ccc/cCcc|p.Ser603fs/c.1804dupC	1867	22	1877	0.0117208	0	0	0	0	1	0	0	0	1	NO	NO	NO	NO	O	NO	NO	NO	NO	NO	NO	NA	NA	26.78	NA	883	0	889	0	984	22	988	0.0222672	9.03959e-07	15	16	Artifact (12)
IT_15	2	25467068	A	AG	DNMT3A	ENST00000264709	frameshift_variant	ccc/cCcc|p.Ser603fs/c.1804dupC	3250	40	3267	0.0122436	0	0	0	0	1	0	0	0	1	NO	NO	NO	NO	O	NO	NO	NO	NO	NO	NO	NA	NA	26.75	NA	1507	0	1512	0	1743	40	1755	0.022792	1.9649e-11	15	16	Artifact (12)
IT_16	2	25467068	A	AG	DNMT3A	ENST00000264709	frameshift_variant	ccc/cCcc|p.Ser603fs/c.1804dupC	2891	31	2906	0.0106676	0	0	0	0	1	0	0	0	1	NO	NO	NO	NO	O	NO	NO	NO	NO	NO	NO	NA	NA	26.73	NA	1339	0	1344	0	1552	31	1562	0.0198464	5.87672e-09	15	16	Artifact (12)
IT_05	2	25467068	A	AG	DNMT3A	ENST00000264709	frameshift_variant	ccc/cCcc|p.Ser603fs/c.1804dupC	3531	45	3543	0.0127011	0	0	0	0	1	0	0	0	1	NO	NO	NO	NO	O	NO	NO	NO	NO	NO	NO	NA	NA	26.6	NA	1563	0	1566	0	1968	45	1977	0.0227618	6.35542e-12	15	16	Artifact (12)
IT_06	2	25467068	A	AG	DNMT3A	ENST00000264709	frameshift_variant	ccc/cCcc|p.Ser603fs/c.1804dupC	2520	34	2528	0.0134494	0	0	0	0	1	0	0	0	1	NO	NO	NO	NO	O	NO	NO	NO	NO	NO	NO	NA	NA	26.35	NA	1139	0	1142	0	1381	34	1386	0.024531	2.46273e-09	15	16	Artifact (12)
IT_17	2	25467068	A	AG	DNMT3A	ENST00000264709	frameshift_variant	ccc/cCcc|p.Ser603fs/c.1804dupC	1064	30	1068	0.0280899	0	0	0	0	1	0	0	0	1	NO	NO	NO	NO	O	NO	NO	NO	NO	NO	NO	NA	NA	25.59	NA	533	0	536	0	531	30	532	0.056391	1.62659e-09	15	16	Artifact (10)
IT_18	2	25467068	A	AG	DNMT3A	ENST00000264709	frameshift_variant	ccc/cCcc|p.Ser603fs/c.1804dupC	754	20	762	0.0262467	0	0	0	0	1	0	0	0	1	NO	NO	NO	NO	O	NO	NO	NO	NO	NO	NO	NA	NA	25.84	NA	350	1	352	0.00284091	404	19	410	0.0463415	0.00011753	15	16	Artifact (10)
IT_21	2	25467068	A	AG	DNMT3A	ENST00000264709	frameshift_variant	ccc/cCcc|p.Ser603fs/c.1804dupC	2357	27	2368	0.011402	0	0	0	0	1	0	0	0	1	NO	NO	NO	NO	O	NO	NO	NO	NO	NO	NO	NA	NA	26.29	NA	1049	0	1051	0	1308	27	1317	0.0205011	2.65024e-07	15	16	Artifact (12)
IT_15	2	25467086	G	GC	DNMT3A	ENST00000264709	frameshift_variant	cgg/cGgg|p.Arg597fs/c.1786_1787insG	3249	36	3251	0.0110735	0	0	0	0	1	0	0	0	1	NO	NO	NO	NO	O	NO	NO	NO	NO	NO	NO	NA	NA	28.91	NA	1472	9	1474	0.00610583	1777	27	1777	0.0151941	0.0174828	1	1	Artifact (5)
IT_23	2	25467095	G	GC	DNMT3A	ENST00000264709	frameshift_variant	ggg/gGgg|p.Leu594fs/c.1777dupG	2142	49	2144	0.0228545	0	0	0	0	1	0	0	0	1	NO	NO	NO	NA	NA	NO	NO	NO	NO	NO	NO	NA	NA	28.92	NA	1015	43	1017	0.0422812	1127	6	1127	0.00532387	6.65904e-09	9	11	Artifact (7)
IT_07	2	25467095	G	GC	DNMT3A	ENST00000264709	frameshift_variant	ggg/gGgg|p.Leu594fs/c.1777dupG	2011	26	2012	0.0129225	0	0	0	0	1	0	0	0	1	NO	NO	NO	NA	NA	NO	NO	NO	NO	NO	NO	NA	NA	29.56	NA	889	22	889	0.0247469	1122	4	1123	0.00356189	3.37984e-05	9	11	Artifact (9)
IT_08	2	25467095	G	GC	DNMT3A	ENST00000264709	frameshift_variant	ggg/gGgg|p.Leu594fs/c.1777dupG	1552	20	1555	0.0128617	0	0	0	0	1	0	0	0	1	NO	NO	NO	NA	NA	NO	NO	NO	NO	NO	NO	NA	NA	29.56	NA	668	15	669	0.0224215	884	5	886	0.00564334	0.00544467	9	11	Artifact (8)
IT_09	2	25467095	G	GC	DNMT3A	ENST00000264709	frameshift_variant	ggg/gGgg|p.Leu594fs/c.1777dupG	2200	35	2202	0.0158946	0	0	0	0	1	0	0	0	1	NO	NO	NO	NA	NA	NO	NO	NO	NO	NO	NO	NA	NA	28.52	NA	950	12	950	0.0126316	1250	23	1252	0.0183706	0.30835	9	11	Artifact (8)
IT_10	2	25467095	G	GC	DNMT3A	ENST00000264709	frameshift_variant	ggg/gGgg|p.Leu594fs/c.1777dupG	2032	31	2032	0.0152559	0	0	0	0	1	0	0	0	1	NO	NO	NO	NA	NA	NO	NO	NO	NO	NO	NO	NA	NA	28.9	NA	942	18	942	0.0191083	1090	13	1090	0.0119266	0.208417	9	11	Artifact (8)
IT_12	2	25467095	G	GC	DNMT3A	ENST00000264709	frameshift_variant	ggg/gGgg|p.Leu594fs/c.1777dupG	1874	23	1874	0.0122732	0	0	0	0	1	0	0	0	1	NO	NO	NO	NA	NA	NO	NO	NO	NO	NO	NO	NA	NA	30.96	NA	875	19	875	0.0217143	999	4	999	0.004004	0.00057027	9	11	Artifact (9)
IT_23	2	25467105	AC	A	DNMT3A	ENST00000264709	frameshift_variant	ggt/|p.Gly590fs/c.1769delG	1895	549	2872	0.191156	1	1	0	0	1	1	0	0	4	NO	NO	COSM166529	haematopoietic_and_lymphoid_tissue	3	NO	NO	NO	NO	NO	NO	NA	NA	22.23	NA	387	549	1363	0.402788	1508	0	1509	0	2.27332e-290	48	51	Artifact (5)
IT_24	2	25467105	AC	A	DNMT3A	ENST00000264709	frameshift_variant	aag/|p.Gly590fs/c.1767delG	830	48	1039	0.0461983	0	0	0	0	1	0	0	0	1	NO	NO	NO	NA	NA	NO	NO	NO	NO	NO	NO	NA	NA	21.17	NA	177	48	385	0.124675	653	0	654	0	6.85939e-31	48	51	Artifact (10)
IT_01	2	25467105	AC	A	DNMT3A	ENST00000264709	frameshift_variant	aag/|p.Gly590fs/c.1767delG	1784	87	2472	0.0351942	0	0	0	0	1	0	0	0	1	NO	NO	NO	NA	NA	NO	NO	NO	NO	NO	NO	NA	NA	21.44	NA	442	86	1127	0.0763088	1342	1	1345	0.000743494	1.75472e-48	48	51	Artifact (10)
IT_02	2	25467105	AC	A	DNMT3A	ENST00000264709	frameshift_variant	aag/|p.Gly590fs/c.1767delG	636	50	961	0.0520291	0	0	0	0	1	0	0	0	1	NO	NO	NO	NA	NA	NO	NO	NO	NO	NO	NO	NA	NA	22.55	NA	107	50	431	0.116009	529	0	530	0	9.10509e-36	48	51	Artifact (9)
IT_07	2	25467105	AC	A	DNMT3A	ENST00000264709	frameshift_variant	ggt/|p.Gly590fs/c.1769delG	1804	462	2648	0.174471	0	1	0	0	1	1	0	0	3	NO	NO	COSM166529	haematopoietic_and_lymphoid_tissue	3	NO	NO	NO	NO	NO	NO	NA	NA	22.02	NA	361	461	1204	0.38289	1443	1	1444	0.000692521	2.42187e-250	48	51	Artifact (6)
IT_08	2	25467105	AC	A	DNMT3A	ENST00000264709	frameshift_variant	ggt/|p.Gly590fs/c.1769delG	1501	326	2112	0.154356	1	1	0	0	1	1	0	0	4	NO	NO	COSM166529	haematopoietic_and_lymphoid_tissue	3	NO	NO	NO	NO	NO	NO	NA	NA	22.24	NA	335	325	944	0.34428	1166	1	1168	0.000856164	4.78153e-171	48	51	Artifact (5)
IT_09	2	25467105	AC	A	DNMT3A	ENST00000264709	frameshift_variant	aag/|p.Gly590fs/c.1767delG	2058	175	2851	0.061382	0	0	0	0	1	0	0	0	1	NO	NO	NO	NA	NA	NO	NO	NO	NO	NO	NO	NA	NA	22.39	NA	489	174	1281	0.135831	1569	1	1570	0.000636943	3.27988e-98	48	51	Artifact (9)
IT_10	2	25467105	AC	A	DNMT3A	ENST00000264709	frameshift_variant	aag/|p.Gly590fs/c.1767delG	1827	269	2618	0.10275	0	0	0	0	1	0	0	0	1	NO	NO	NO	NA	NA	NO	NO	NO	NO	NO	NO	NA	NA	22.76	NA	448	268	1235	0.217004	1379	1	1383	0.000723066	9.58944e-141	48	51	Artifact (8)
IT_11	2	25467105	AC	A	DNMT3A	ENST00000264709	frameshift_variant	aag/|p.Gly590fs/c.1767delG	1579	287	1888	0.152013	0	0	0	0	1	1	0	0	2	NO	NO	NO	NA	NA	NO	NO	NO	NO	NO	NO	NA	NA	26.12	NA	617	286	925	0.309189	962	1	963	0.00103842	1.06549e-100	48	51	Artifact (7)
IT_12	2	25467105	AC	A	DNMT3A	ENST00000264709	frameshift_variant	ggt/|p.Gly590fs/c.1769delG	2220	727	2995	0.242738	0	1	0	0	1	1	0	0	3	NO	NO	COSM166529	haematopoietic_and_lymphoid_tissue	3	NO	NO	NO	NO	NO	NO	NA	NA	24.61	NA	648	727	1422	0.511252	1572	0	1573	0	1.01806e-302	48	51	Artifact (6)
IT_13	2	25467105	AC	A	DNMT3A	ENST00000264709	frameshift_variant	ggt/|p.Gly590fs/c.1769delG	1034	163	1260	0.129365	1	1	0	0	1	1	0	0	4	NO	NO	COSM166529	haematopoietic_and_lymphoid_tissue	3	NO	NO	NO	NO	NO	NO	NA	NA	24.08	NA	344	163	570	0.285965	690	0	690	0	2.82409e-69	48	51	Artifact (5)
IT_14	2	25467105	AC	A	DNMT3A	ENST00000264709	frameshift_variant	ggt/|p.Gly590fs/c.1769delG	1152	327	1612	0.202854	1	1	0	0	1	1	0	0	4	NO	NO	COSM166529	haematopoietic_and_lymphoid_tissue	3	NO	NO	NO	NO	NO	NO	NA	NA	23.4	NA	324	327	783	0.417625	828	0	829	0	5.39732e-144	48	51	Artifact (5)
IT_15	2	25467105	AC	A	DNMT3A	ENST00000264709	frameshift_variant	ggt/|p.Gly590fs/c.1769delG	2396	653	3541	0.184411	1	1	0	0	1	1	0	0	4	NO	NO	COSM166529	haematopoietic_and_lymphoid_tissue	3	NO	NO	NO	NO	NO	NO	NA	NA	22.61	NA	438	652	1578	0.413181	1958	1	1963	0.000509424	0	48	51	Artifact (5)
IT_16	2	25467105	AC	A	DNMT3A	ENST00000264709	frameshift_variant	ggt/|p.Gly590fs/c.1769delG	1859	562	2851	0.197124	1	1	0	0	1	1	0	0	4	NO	NO	COSM166529	haematopoietic_and_lymphoid_tissue	3	NO	NO	NO	NO	NO	NO	NA	NA	23.14	NA	258	562	1250	0.4496	1601	0	1601	0	0	48	51	Artifact (5)
IT_05	2	25467105	AC	A	DNMT3A	ENST00000264709	frameshift_variant	aag/|p.Gly590fs/c.1767delG	2652	383	3850	0.0994805	0	0	0	0	1	0	0	0	1	NO	NO	NO	NA	NA	NO	NO	NO	NO	NO	NO	NA	NA	21.89	NA	490	381	1685	0.226113	2162	2	2165	0.000923788	1.05756e-234	48	51	Artifact (9)
IT_06	2	25467105	AC	A	DNMT3A	ENST00000264709	frameshift_variant	aag/|p.Gly590fs/c.1767delG	2314	351	3172	0.110656	0	0	0	0	1	0	0	0	1	NO	NO	NO	NA	NA	NO	NO	NO	NO	NO	NO	NA	NA	22.23	NA	611	348	1466	0.237381	1703	3	1706	0.0017585	7.36616e-170	48	51	Artifact (8)
IT_17	2	25467105	AC	A	DNMT3A	ENST00000264709	frameshift_variant	aag/|p.Gly590fs/c.1767delG	1051	166	1417	0.117149	0	0	0	0	1	0	0	0	1	NO	NO	NO	NA	NA	NO	NO	NO	NO	NO	NO	NA	NA	23.44	NA	334	166	700	0.237143	717	0	717	0	3.27521e-73	48	51	Artifact (8)
IT_18	2	25467105	AC	A	DNMT3A	ENST00000264709	frameshift_variant	aag/|p.Gly590fs/c.1767delG	1074	115	1329	0.0865312	0	0	0	0	1	0	0	0	1	NO	NO	NO	NA	NA	NO	NO	NO	NO	NO	NO	NA	NA	23.69	NA	367	114	619	0.184168	707	1	710	0.00140845	1.48019e-47	48	51	Artifact (9)
IT_19	2	25467105	AC	A	DNMT3A	ENST00000264709	frameshift_variant	ggt/|p.Gly590fs/c.1769delG	4338	1628	6669	0.244115	1	1	1	0	1	1	0	0	5	NO	NO	COSM166529	haematopoietic_and_lymphoid_tissue	3	NO	NO	NO	NO	NO	NO	NA	NA	24.09	NA	466	1628	2793	0.582886	3872	0	3876	0	0	48	51	Artifact (4)
IT_20	2	25467105	AC	A	DNMT3A	ENST00000264709	frameshift_variant	ggt/|p.Gly590fs/c.1769delG	957	306	1538	0.19896	0	1	0	0	1	1	0	0	3	NO	NO	COSM166529	haematopoietic_and_lymphoid_tissue	3	NO	NO	NO	NO	NO	NO	NA	NA	24.64	NA	80	306	661	0.462935	877	0	877	0	1.30902e-218	48	51	Artifact (6)
IT_21	2	25467105	AC	A	DNMT3A	ENST00000264709	frameshift_variant	ggt/|p.Gly590fs/c.1769delG	1722	524	2611	0.200689	1	1	0	0	1	1	0	0	4	NO	NO	COSM166529	haematopoietic_and_lymphoid_tissue	3	NO	NO	NO	NO	NO	NO	NA	NA	24.63	NA	266	522	1152	0.453125	1456	2	1459	0.0013708	1.37367e-305	48	51	Artifact (5)
IT_22	2	25467105	AC	A	DNMT3A	ENST00000264709	frameshift_variant	ggt/|p.Gly590fs/c.1769delG	2297	759	3352	0.226432	0	1	0	0	1	1	0	0	3	NO	NO	COSM166529	haematopoietic_and_lymphoid_tissue	3	NO	NO	NO	NO	NO	NO	NA	NA	25.25	NA	567	756	1619	0.466955	1730	3	1733	0.0017311	0	48	51	Artifact (6)
IT_23	2	25467105	ACC	A	DNMT3A	ENST00000264709	frameshift_variant	aagggt/|p.Gly590fs/c.1767_1768delGG	1895	424	2872	0.147632	0	0	0	0	1	0	0	0	1	NO	NO	NO	NA	NA	NO	NO	NO	NO	NO	NO	NA	NA	22.23	NA	387	424	1363	0.311079	1508	0	1509	0	6.69203e-236	24	51	Artifact (8)
IT_24	2	25467105	ACC	A	DNMT3A	ENST00000264709	frameshift_variant	ggt/|p.Gly590fs/c.1768_1769delGG	830	159	1039	0.153032	1	1	0	0	1	1	0	0	4	NO	NO	NO	NA	NA	NO	NO	NO	NO	NO	NO	NA	NA	21.17	NA	177	159	385	0.412987	653	0	654	0	4.42026e-89	24	51	Artifact (6)
IT_01	2	25467105	ACC	A	DNMT3A	ENST00000264709	frameshift_variant	ggt/|p.Gly590fs/c.1768_1769delGG	1784	599	2472	0.242314	1	1	0	0	1	1	0	0	4	NO	NO	NO	NA	NA	NO	NO	NO	NO	NO	NO	NA	NA	21.44	NA	442	599	1127	0.5315	1342	0	1345	0	6.52369e-276	24	51	Artifact (6)
IT_02	2	25467105	ACC	A	DNMT3A	ENST00000264709	frameshift_variant	ggt/|p.Gly590fs/c.1768_1769delGG	636	273	961	0.284079	1	1	0	0	1	1	0	0	4	NO	NO	NO	NA	NA	NO	NO	NO	NO	NO	NO	NA	NA	22.55	NA	107	273	431	0.633411	529	0	530	0	1.08462e-143	24	51	Artifact (6)
IT_03	2	25467105	ACC	A	DNMT3A	ENST00000264709	frameshift_variant	ggt/|p.Gly590fs/c.1768_1769delGG	335	120	469	0.255864	1	1	0	0	1	1	0	0	4	NO	NO	NO	NA	NA	NO	NO	NO	NO	NO	NO	NA	NA	23.45	NA	68	120	202	0.594059	267	0	267	0	3.80123e-61	24	51	Artifact (6)
IT_04	2	25467105	ACC	A	DNMT3A	ENST00000264709	frameshift_variant	ggt/|p.Gly590fs/c.1768_1769delGG	383	163	555	0.293694	1	1	0	0	1	1	0	0	4	NO	NO	NO	NA	NA	NO	NO	NO	NO	NO	NO	NA	NA	23.53	NA	96	163	267	0.610487	287	0	288	0	5.53167e-71	24	51	Artifact (6)
IT_07	2	25467105	ACC	A	DNMT3A	ENST00000264709	frameshift_variant	ggt/|p.Gly590fs/c.1768_1769delGG	1804	378	2648	0.142749	1	0	0	0	1	0	0	0	2	NO	NO	NO	NA	NA	NO	NO	NO	NO	NO	NO	NA	NA	22.02	NA	361	378	1204	0.313953	1443	0	1444	0	4.48747e-215	24	51	Artifact (7)
IT_08	2	25467105	ACC	A	DNMT3A	ENST00000264709	frameshift_variant	aagggt/|p.Gly590fs/c.1767_1768delGG	1501	281	2112	0.133049	0	0	0	0	1	0	0	0	1	NO	NO	NO	NA	NA	NO	NO	NO	NO	NO	NO	NA	NA	22.24	NA	335	281	944	0.297669	1166	0	1168	0	1.64651e-153	24	51	Artifact (8)
IT_09	2	25467105	ACC	A	DNMT3A	ENST00000264709	frameshift_variant	ggt/|p.Gly590fs/c.1768_1769delGG	2058	613	2851	0.215012	1	1	0	0	1	1	0	0	4	NO	NO	NO	NA	NA	NO	NO	NO	NO	NO	NO	NA	NA	22.39	NA	489	613	1281	0.478532	1569	0	1570	0	9.04664e-297	24	51	Artifact (6)
IT_10	2	25467105	ACC	A	DNMT3A	ENST00000264709	frameshift_variant	ggt/|p.Gly590fs/c.1768_1769delGG	1827	518	2618	0.197861	1	1	0	0	1	1	0	0	4	NO	NO	NO	NA	NA	NO	NO	NO	NO	NO	NO	NA	NA	22.76	NA	448	518	1235	0.419433	1379	0	1383	0	1.09474e-248	24	51	Artifact (6)
IT_11	2	25467105	ACC	A	DNMT3A	ENST00000264709	frameshift_variant	aagggt/|p.Gly590fs/c.1767_1768delGG	1579	22	1888	0.0116525	0	0	0	0	1	0	0	0	1	NO	NO	NO	NA	NA	NO	NO	NO	NO	NO	NO	NA	NA	26.12	NA	617	22	925	0.0237838	962	0	963	0	1.34451e-09	24	51	Artifact (12)
IT_12	2	25467105	ACC	A	DNMT3A	ENST00000264709	frameshift_variant	aagggt/|p.Gly590fs/c.1767_1768delGG	2220	42	2995	0.0140234	0	0	0	0	1	0	0	0	1	NO	NO	NO	NA	NA	NO	NO	NO	NO	NO	NO	NA	NA	24.61	NA	648	42	1422	0.0295359	1572	0	1573	0	9.04011e-23	24	51	Artifact (12)
IT_13	2	25467105	ACC	A	DNMT3A	ENST00000264709	frameshift_variant	aagggt/|p.Gly590fs/c.1767_1768delGG	1034	61	1260	0.0484127	0	0	0	0	1	0	0	0	1	NO	NO	NO	NA	NA	NO	NO	NO	NO	NO	NO	NA	NA	24.08	NA	344	61	570	0.107018	690	0	690	0	2.09867e-28	24	51	Artifact (10)
IT_14	2	25467105	ACC	A	DNMT3A	ENST00000264709	frameshift_variant	aagggt/|p.Gly590fs/c.1767_1768delGG	1152	128	1612	0.0794045	0	0	0	0	1	0	0	0	1	NO	NO	NO	NA	NA	NO	NO	NO	NO	NO	NO	NA	NA	23.4	NA	324	128	783	0.163474	828	0	829	0	2.08869e-64	24	51	Artifact (9)
IT_15	2	25467105	ACC	A	DNMT3A	ENST00000264709	frameshift_variant	aagggt/|p.Gly590fs/c.1767_1768delGG	2396	478	3541	0.13499	0	0	0	0	1	0	0	0	1	NO	NO	NO	NA	NA	NO	NO	NO	NO	NO	NO	NA	NA	22.61	NA	438	478	1578	0.302915	1958	0	1963	0	6.46711e-287	24	51	Artifact (8)
IT_16	2	25467105	ACC	A	DNMT3A	ENST00000264709	frameshift_variant	aagggt/|p.Gly590fs/c.1767_1768delGG	1859	426	2851	0.149421	0	0	0	0	1	0	0	0	1	NO	NO	NO	NA	NA	NO	NO	NO	NO	NO	NO	NA	NA	23.14	NA	258	426	1250	0.3408	1601	0	1601	0	4.81647e-281	24	51	Artifact (8)
IT_05	2	25467105	ACC	A	DNMT3A	ENST00000264709	frameshift_variant	ggt/|p.Gly590fs/c.1768_1769delGG	2652	813	3850	0.211169	1	1	0	0	1	1	0	0	4	NO	NO	NO	NA	NA	NO	NO	NO	NO	NO	NO	NA	NA	21.89	NA	490	813	1685	0.482493	2162	0	2165	0	0	24	51	Artifact (6)
IT_06	2	25467105	ACC	A	DNMT3A	ENST00000264709	frameshift_variant	ggt/|p.Gly590fs/c.1768_1769delGG	2314	505	3172	0.159206	0	1	0	0	1	1	0	0	3	NO	NO	NO	NA	NA	NO	NO	NO	NO	NO	NO	NA	NA	22.23	NA	611	505	1466	0.344475	1703	0	1706	0	2.1319e-242	24	51	Artifact (7)
IT_17	2	25467105	ACC	A	DNMT3A	ENST00000264709	frameshift_variant	ggt/|p.Gly590fs/c.1768_1769delGG	1051	200	1417	0.141143	1	1	0	0	1	1	0	0	4	NO	NO	NO	NA	NA	NO	NO	NO	NO	NO	NO	NA	NA	23.44	NA	334	200	700	0.285714	717	0	717	0	4.73485e-86	24	51	Artifact (6)
IT_18	2	25467105	ACC	A	DNMT3A	ENST00000264709	frameshift_variant	ggt/|p.Gly590fs/c.1768_1769delGG	1074	137	1329	0.103085	0	1	0	0	1	1	0	0	3	NO	NO	NO	NA	NA	NO	NO	NO	NO	NO	NO	NA	NA	23.69	NA	367	137	619	0.221325	707	0	710	0	2.79496e-58	24	51	Artifact (7)
IT_19	2	25467105	ACC	A	DNMT3A	ENST00000264709	frameshift_variant	aagggt/|p.Gly590fs/c.1767_1768delGG	4338	698	6669	0.104663	0	0	0	0	1	0	0	0	1	NO	NO	NO	NA	NA	NO	NO	NO	NO	NO	NO	NA	NA	24.09	NA	466	698	2793	0.24991	3872	0	3876	0	0	24	51	Artifact (8)
IT_20	2	25467105	ACC	A	DNMT3A	ENST00000264709	frameshift_variant	ggt/|p.Gly590fs/c.1768_1769delGG	957	274	1538	0.178153	1	0	0	0	1	0	0	0	2	NO	NO	NO	NA	NA	NO	NO	NO	NO	NO	NO	NA	NA	24.64	NA	80	274	661	0.414523	877	0	877	0	9.83918e-202	24	51	Artifact (7)
IT_21	2	25467105	ACC	A	DNMT3A	ENST00000264709	frameshift_variant	aagggt/|p.Gly590fs/c.1767_1768delGG	1722	363	2611	0.139027	0	0	0	0	1	0	0	0	1	NO	NO	NO	NA	NA	NO	NO	NO	NO	NO	NO	NA	NA	24.63	NA	266	363	1152	0.315104	1456	0	1459	0	3.89906e-233	24	51	Artifact (8)
IT_22	2	25467105	ACC	A	DNMT3A	ENST00000264709	frameshift_variant	aagggt/|p.Gly590fs/c.1767_1768delGG	2297	295	3352	0.0880072	0	0	0	0	1	0	0	0	1	NO	NO	NO	NA	NA	NO	NO	NO	NO	NO	NO	NA	NA	25.25	NA	567	295	1619	0.182211	1730	0	1733	0	4.31784e-159	24	51	Artifact (9)
IT_17	2	25467113	G	GC	DNMT3A	ENST00000264709	frameshift_variant	ggg/gGgg|p.His588fs/c.1759dupG	2289	26	2291	0.0113488	0	0	0	0	1	0	0	0	1	NO	NO	NO	NO	O	NO	NO	NO	NO	NO	NO	NA	NA	26.72	NA	1082	7	1084	0.00645756	1207	19	1207	0.0157415	0.047299	1	14	Artifact (6)
IT_11	2	25467113	GC	G	DNMT3A	ENST00000264709	frameshift_variant	ggg/|p.His588fs/c.1760delG	3215	34	3251	0.0104583	0	0	0	0	1	0	0	0	1	NO	NO	NO	NO	O	NO	NO	NO	NO	NO	NO	NA	NA	26.32	NA	1496	34	1531	0.0222077	1719	0	1720	0	6.2352e-12	13	14	Artifact (12)
IT_12	2	25467113	GC	G	DNMT3A	ENST00000264709	frameshift_variant	ggg/|p.His588fs/c.1760delG	4725	101	4840	0.0208678	0	0	0	0	1	0	0	0	1	NO	NO	NO	NO	O	NO	NO	NO	NO	NO	NO	NA	NA	25.73	NA	2215	100	2324	0.0430293	2510	1	2516	0.000397456	2.16844e-31	13	14	Artifact (10)
IT_13	2	25467113	GC	G	DNMT3A	ENST00000264709	frameshift_variant	ggg/|p.His588fs/c.1760delG	1893	49	1945	0.0251928	0	0	0	0	1	0	0	0	1	NO	NO	NO	NO	O	NO	NO	NO	NO	NO	NO	NA	NA	25.78	NA	827	49	877	0.0558723	1066	0	1068	0	5.36543e-18	13	14	Artifact (10)
IT_14	2	25467113	GC	G	DNMT3A	ENST00000264709	frameshift_variant	ggg/|p.His588fs/c.1760delG	2026	105	2131	0.0492726	0	0	0	0	1	1	0	0	2	NO	NO	NO	NO	O	NO	NO	NO	NO	NO	NO	NA	NA	25.08	NA	880	105	985	0.106599	1146	0	1146	0	2.77724e-37	13	14	Artifact (9)
IT_15	2	25467113	GC	G	DNMT3A	ENST00000264709	frameshift_variant	ggg/|p.His588fs/c.1760delG	3748	139	3895	0.0356868	0	0	0	0	1	0	0	0	1	NO	NO	NO	NO	O	NO	NO	NO	NO	NO	NO	NA	NA	23.42	NA	1466	134	1606	0.0834371	2282	5	2289	0.00218436	2.51409e-46	13	14	Artifact (10)
IT_16	2	25467113	GC	G	DNMT3A	ENST00000264709	frameshift_variant	ggg/|p.His588fs/c.1760delG	2613	85	2703	0.0314465	0	0	0	0	1	0	0	0	1	NO	NO	NO	NO	O	NO	NO	NO	NO	NO	NO	NA	NA	23.3	NA	980	82	1065	0.0769953	1633	3	1638	0.0018315	2.1617e-30	13	14	Artifact (10)
IT_17	2	25467113	GC	G	DNMT3A	ENST00000264709	frameshift_variant	ggg/|p.His588fs/c.1760delG	2250	41	2292	0.0178883	0	0	0	0	1	0	0	0	1	NO	NO	NO	NO	O	NO	NO	NO	NO	NO	NO	NA	NA	24.23	NA	1042	41	1084	0.0378229	1208	0	1208	0	3.03459e-14	13	14	Artifact (12)
IT_18	2	25467113	GC	G	DNMT3A	ENST00000264709	frameshift_variant	ggg/|p.His588fs/c.1760delG	2468	35	2503	0.0139832	0	0	0	0	1	0	0	0	1	NO	NO	NO	NO	O	NO	NO	NO	NO	NO	NO	NA	NA	25.03	NA	1104	35	1139	0.0307287	1364	0	1364	0	8.06715e-13	13	14	Artifact (12)
IT_19	2	25467113	GC	G	DNMT3A	ENST00000264709	frameshift_variant	ggg/|p.His588fs/c.1760delG	8872	301	9178	0.0327958	0	0	0	0	1	0	0	0	1	NO	NO	NO	NO	O	NO	NO	NO	NO	NO	NO	NA	NA	24.87	NA	3377	297	3678	0.0807504	5495	4	5500	0.000727273	2.75253e-114	13	14	Artifact (10)
IT_20	2	25467113	GC	G	DNMT3A	ENST00000264709	frameshift_variant	ggg/|p.His588fs/c.1760delG	1581	58	1639	0.0353874	0	0	0	0	1	0	0	0	1	NO	NO	NO	NO	O	NO	NO	NO	NO	NO	NO	NA	NA	24.38	NA	602	58	660	0.0878788	979	0	979	0	2.57298e-24	13	14	Artifact (10)
IT_21	2	25467113	GC	G	DNMT3A	ENST00000264709	frameshift_variant	ggg/|p.His588fs/c.1760delG	2766	90	2858	0.0314906	0	0	0	0	1	0	0	0	1	NO	NO	NO	NO	O	NO	NO	NO	NO	NO	NO	NA	NA	24.99	NA	1123	88	1213	0.0725474	1643	2	1645	0.00121581	3.53292e-31	13	14	Artifact (10)
IT_22	2	25467113	GC	G	DNMT3A	ENST00000264709	frameshift_variant	ggg/|p.His588fs/c.1760delG	5013	191	5211	0.0366532	0	0	0	0	1	0	0	0	1	NO	NO	NO	NO	O	NO	NO	NO	NO	NO	NO	NA	NA	25.68	NA	2229	189	2421	0.0780669	2784	2	2790	0.000716846	1.15052e-61	13	14	Artifact (10)
IT_17	2	25467116	C	T	DNMT3A	ENST00000264709	missense_variant	Ggg/Agg|p.Gly587Arg/c.1759G>A	2255	23	2283	0.0100745	0	0	0	0	1	0	0	0	1	NO	NO	NO	NO	O	NO	NO	NO	NO	NO	NO	-0.379	Tolerated	23.72	18.22	1046	22	1073	0.0205033	1209	1	1210	0.000826446	1.09332e-06	6	6	Artifact (8)
IT_09	2	25467126	G	GT	DNMT3A	ENST00000264709	frameshift_variant+stop_gained	tgc/tgAc|p.Cys583fs/c.1748_1749insA	2296	24	2300	0.0104348	0	0	0	0	1	0	0	0	1	NO	NO	NO	NO	O	NO	NO	NO	NO	NO	NO	NA	NA	30.38	NA	1111	0	1113	0	1185	24	1187	0.020219	1.6263e-07	11	11	Artifact (8)
IT_13	2	25467126	G	GT	DNMT3A	ENST00000264709	frameshift_variant+stop_gained	tgc/tgAc|p.Cys583fs/c.1748_1749insA	1326	29	1330	0.0218045	0	0	0	0	1	0	0	0	1	NO	NO	NO	NO	O	NO	NO	NO	NO	NO	NO	NA	NA	30.71	NA	666	0	669	0	660	29	661	0.0438729	3.08358e-09	11	11	Artifact (6)
IT_14	2	25467126	G	GT	DNMT3A	ENST00000264709	frameshift_variant+stop_gained	tgc/tgAc|p.Cys583fs/c.1748_1749insA	1106	20	1108	0.0180505	0	0	0	0	1	0	0	0	1	NO	NO	NO	NO	O	NO	NO	NO	NO	NO	NO	NA	NA	31.18	NA	561	0	562	0	545	20	546	0.03663	1.61038e-06	11	11	Artifact (8)
IT_05	2	25467126	G	GT	DNMT3A	ENST00000264709	frameshift_variant+stop_gained	tgc/tgAc|p.Cys583fs/c.1748_1749insA	2273	25	2278	0.0109745	0	0	0	0	1	0	0	0	1	NO	NO	NO	NO	O	NO	NO	NO	NO	NO	NO	NA	NA	30.05	NA	1051	0	1054	0	1222	25	1224	0.0204248	2.92383e-07	11	11	Artifact (8)
IT_06	2	25467126	G	GT	DNMT3A	ENST00000264709	frameshift_variant+stop_gained	tgc/tgAc|p.Cys583fs/c.1748_1749insA	3094	33	3097	0.0106555	0	0	0	0	1	0	0	0	1	NO	NO	NO	NO	O	NO	NO	NO	NO	NO	NO	NA	NA	30.09	NA	1514	1	1514	0.000660502	1580	32	1583	0.0202148	1.01365e-08	11	11	Artifact (8)
IT_17	2	25467126	G	GT	DNMT3A	ENST00000264709	frameshift_variant+stop_gained	tgc/tgAc|p.Cys583fs/c.1748_1749insA	1432	21	1434	0.0146444	0	0	0	0	1	0	0	0	1	NO	NO	NO	NO	O	NO	NO	NO	NO	NO	NO	NA	NA	30.77	NA	729	0	730	0	703	21	704	0.0298295	3.82668e-07	11	11	Artifact (8)
IT_18	2	25467126	G	GT	DNMT3A	ENST00000264709	frameshift_variant+stop_gained	tgc/tgAc|p.Cys583fs/c.1748_1749insA	1897	35	1901	0.0184114	0	0	0	0	1	0	0	0	1	NO	NO	NO	NO	O	NO	NO	NO	NO	NO	NO	NA	NA	30.88	NA	915	0	917	0	982	35	984	0.0355691	2.60265e-10	11	11	Artifact (8)
IT_19	2	25467126	G	GT	DNMT3A	ENST00000264709	frameshift_variant+stop_gained	tgc/tgAc|p.Cys583fs/c.1748_1749insA	3247	38	3253	0.0116815	0	0	0	0	1	0	0	0	1	NO	NO	NO	NO	O	NO	NO	NO	NO	NO	NO	NA	NA	31.98	NA	1401	0	1403	0	1846	38	1850	0.0205405	7.2058e-10	11	11	Artifact (8)
IT_23	2	25467134	A	AG	DNMT3A	ENST00000264709	frameshift_variant	ccc/cCcc|p.Trp581fs/c.1738dupC	1840	21	1845	0.0113821	0	0	0	0	1	0	0	0	1	NO	NO	NO	NA	NA	NO	NO	NO	NO	NO	NO	NA	NA	29.3	NA	890	1	892	0.00112108	950	20	953	0.0209864	2.5407e-05	5	26	Artifact (9)
IT_09	2	25467134	A	AG	DNMT3A	ENST00000264709	frameshift_variant	ccc/cCcc|p.Trp581fs/c.1738dupC	2107	26	2116	0.0122873	0	0	0	0	1	0	0	0	1	NO	NO	NO	NA	NA	NO	NO	NO	NO	NO	NO	NA	NA	28.8	NA	1025	3	1030	0.00291262	1082	23	1086	0.0211786	0.000101581	5	26	Artifact (9)
IT_12	2	25467134	A	AG	DNMT3A	ENST00000264709	frameshift_variant	ccc/cCcc|p.Trp581fs/c.1738dupC	3075	34	3083	0.0110282	0	0	0	0	1	0	0	0	1	NO	NO	NO	NA	NA	NO	NO	NO	NO	NO	NO	NA	NA	29.42	NA	1527	0	1530	0	1548	34	1553	0.0218931	1.14868e-10	5	26	Artifact (9)
IT_24	2	25467134	AG	A	DNMT3A	ENST00000264709	frameshift_variant	ccc/|p.Trp581fs/c.1739delC	397	33	434	0.0760369	0	0	0	0	1	0	0	0	1	NO	NO	NO	NA	NA	NO	NO	NO	NO	NO	NO	NA	NA	21.82	NA	212	1	215	0.00465116	185	32	219	0.146119	2.56602e-09	21	26	Artifact (9)
IT_01	2	25467134	AG	A	DNMT3A	ENST00000264709	frameshift_variant	ccc/|p.Trp581fs/c.1739delC	1356	27	1386	0.0194805	0	0	0	0	1	0	0	0	1	NO	NO	NO	NA	NA	NO	NO	NO	NO	NO	NO	NA	NA	23.08	NA	647	10	658	0.0151976	709	17	728	0.0233516	0.332009	21	26	Artifact (11)
IT_07	2	25467134	AG	A	DNMT3A	ENST00000264709	frameshift_variant	ccc/|p.Trp581fs/c.1739delC	1441	24	1467	0.0163599	0	0	0	0	1	0	0	0	1	NO	NO	NO	NA	NA	NO	NO	NO	NO	NO	NO	NA	NA	21.07	NA	689	22	712	0.0308989	752	2	755	0.00264901	1.09424e-05	21	26	Artifact (12)
IT_09	2	25467134	AG	A	DNMT3A	ENST00000264709	frameshift_variant	ccc/|p.Trp581fs/c.1739delC	2085	24	2114	0.0113529	0	0	0	0	1	0	0	0	1	NO	NO	NO	NA	NA	NO	NO	NO	NO	NO	NO	NA	NA	22.17	NA	1016	11	1029	0.01069	1069	13	1085	0.0119816	0.839227	21	26	Artifact (11)
IT_10	2	25467134	AG	A	DNMT3A	ENST00000264709	frameshift_variant	ccc/|p.Trp581fs/c.1739delC	1989	44	2040	0.0215686	0	0	0	0	1	0	0	0	1	NO	NO	NO	NA	NA	NO	NO	NO	NO	NO	NO	NA	NA	23.22	NA	1029	26	1057	0.0245979	960	18	983	0.0183113	0.362946	21	26	Artifact (9)
IT_12	2	25467134	AG	A	DNMT3A	ENST00000264709	frameshift_variant	ccc/|p.Trp581fs/c.1739delC	3042	33	3081	0.0107108	0	0	0	0	1	0	0	0	1	NO	NO	NO	NA	NA	NO	NO	NO	NO	NO	NO	NA	NA	24.7	NA	1510	18	1529	0.0117724	1532	15	1552	0.00966495	0.603648	21	26	Artifact (11)
IT_13	2	25467134	AG	A	DNMT3A	ENST00000264709	frameshift_variant	ccc/|p.Trp581fs/c.1739delC	1227	69	1302	0.0529954	0	0	0	0	1	0	0	0	1	NO	NO	NO	NA	NA	NO	NO	NO	NO	NO	NO	NA	NA	22.16	NA	631	16	650	0.0246154	596	53	652	0.0812883	5.23823e-06	21	26	Artifact (8)
IT_14	2	25467134	AG	A	DNMT3A	ENST00000264709	frameshift_variant	ccc/|p.Trp581fs/c.1739delC	975	55	1034	0.0531915	0	0	0	0	1	0	0	0	1	NO	NO	NO	NA	NA	NO	NO	NO	NO	NO	NO	NA	NA	23.19	NA	512	8	521	0.0153551	463	47	513	0.0916179	1.6755e-08	21	26	Artifact (9)
IT_15	2	25467134	AG	A	DNMT3A	ENST00000264709	frameshift_variant	ccc/|p.Trp581fs/c.1739delC	923	52	977	0.0532242	0	0	0	0	1	0	0	0	1	NO	NO	NO	NA	NA	NO	NO	NO	NO	NO	NO	NA	NA	22.41	NA	441	12	454	0.0264317	482	40	523	0.0764818	0.000504789	21	26	Artifact (8)
IT_05	2	25467134	AG	A	DNMT3A	ENST00000264709	frameshift_variant	ccc/|p.Trp581fs/c.1739delC	1725	22	1749	0.0125786	0	0	0	0	1	0	0	0	1	NO	NO	NO	NA	NA	NO	NO	NO	NO	NO	NO	NA	NA	23.02	NA	808	8	817	0.00979192	917	14	932	0.0150215	0.392956	21	26	Artifact (11)
IT_06	2	25467134	AG	A	DNMT3A	ENST00000264709	frameshift_variant	ccc/|p.Trp581fs/c.1739delC	2734	42	2781	0.0151025	0	0	0	0	1	0	0	0	1	NO	NO	NO	NA	NA	NO	NO	NO	NO	NO	NO	NA	NA	23.23	NA	1344	15	1360	0.0110294	1390	27	1421	0.0190007	0.088938	21	26	Artifact (11)
IT_17	2	25467134	AG	A	DNMT3A	ENST00000264709	frameshift_variant	ccc/|p.Trp581fs/c.1739delC	1327	52	1383	0.0375994	0	0	0	0	1	0	0	0	1	NO	NO	NO	NA	NA	NO	NO	NO	NO	NO	NO	NA	NA	23.67	NA	677	27	704	0.0383523	650	25	679	0.0368189	1	21	26	Artifact (9)
IT_18	2	25467134	AG	A	DNMT3A	ENST00000264709	frameshift_variant	ccc/|p.Trp581fs/c.1739delC	1790	66	1861	0.0354648	0	0	0	0	1	0	0	0	1	NO	NO	NO	NA	NA	NO	NO	NO	NO	NO	NO	NA	NA	23.13	NA	878	17	899	0.0189099	912	49	962	0.0509356	0.000222588	21	26	Artifact (9)
IT_19	2	25467134	AG	A	DNMT3A	ENST00000264709	frameshift_variant	ccc/|p.Trp581fs/c.1739delC	2911	86	3001	0.0286571	0	0	0	0	1	0	0	0	1	NO	NO	NO	NA	NA	NO	NO	NO	NO	NO	NO	NA	NA	23.61	NA	1281	11	1294	0.00850077	1630	75	1707	0.0439367	1.31732e-09	21	26	Artifact (9)
IT_22	2	25467134	AG	A	DNMT3A	ENST00000264709	frameshift_variant	ccc/|p.Trp581fs/c.1739delC	2896	51	2955	0.0172589	0	0	0	0	1	0	0	0	1	NO	NO	NO	NA	NA	NO	NO	NO	NO	NO	NO	NA	NA	23.73	NA	1354	17	1376	0.0123547	1542	34	1579	0.0215326	0.0654096	21	26	Artifact (11)
IT_23	2	25467144	C	CG	DNMT3A	ENST00000264709	frameshift_variant	aag/aaCg|p.Lys577fs/c.1730_1731insC	1836	55	1838	0.0299238	0	0	0	0	1	0	0	0	1	NO	NO	NO	NO	O	NO	NO	NO	NO	NO	NO	NA	NA	26.39	NA	886	0	886	0	950	55	952	0.0577731	4.11619e-16	14	14	Artifact (9)
IT_01	2	25467144	C	CG	DNMT3A	ENST00000264709	frameshift_variant	aag/aaCg|p.Lys577fs/c.1730_1731insC	1389	32	1389	0.0230382	0	0	0	0	1	0	0	0	1	NO	NO	NO	NO	O	NO	NO	NO	NO	NO	NO	NA	NA	26.28	NA	655	0	655	0	734	32	734	0.0435967	2.36232e-09	14	14	Artifact (9)
IT_07	2	25467144	C	CG	DNMT3A	ENST00000264709	frameshift_variant	aag/aaCg|p.Lys577fs/c.1730_1731insC	1464	49	1465	0.0334471	0	0	0	0	1	0	0	0	1	NO	NO	NO	NO	O	NO	NO	NO	NO	NO	NO	NA	NA	26.53	NA	709	0	710	0	755	49	755	0.0649007	1.9111e-14	14	14	Artifact (9)
IT_08	2	25467144	C	CG	DNMT3A	ENST00000264709	frameshift_variant	aag/aaCg|p.Lys577fs/c.1730_1731insC	1339	51	1340	0.0380597	0	0	0	0	1	0	0	0	1	NO	NO	NO	NO	O	NO	NO	NO	NO	NO	NO	NA	NA	26.54	NA	628	1	629	0.00158983	711	50	711	0.0703235	1.62845e-12	14	14	Artifact (9)
IT_09	2	25467144	C	CG	DNMT3A	ENST00000264709	frameshift_variant	aag/aaCg|p.Lys577fs/c.1730_1731insC	2111	34	2114	0.0160833	0	0	0	0	1	0	0	0	1	NO	NO	NO	NO	O	NO	NO	NO	NO	NO	NO	NA	NA	26.93	NA	1019	0	1021	0	1092	34	1093	0.031107	2.47172e-10	14	14	Artifact (11)
IT_10	2	25467144	C	CG	DNMT3A	ENST00000264709	frameshift_variant	aag/aaCg|p.Lys577fs/c.1730_1731insC	2036	33	2036	0.0162083	0	0	0	0	1	0	0	0	1	NO	NO	NO	NO	O	NO	NO	NO	NO	NO	NO	NA	NA	26.72	NA	1049	0	1049	0	987	33	987	0.0334347	5.59612e-11	14	14	Artifact (11)
IT_11	2	25467144	C	CG	DNMT3A	ENST00000264709	frameshift_variant	aag/aaCg|p.Lys577fs/c.1730_1731insC	2547	29	2548	0.0113815	0	0	0	0	1	0	0	0	1	NO	NO	NO	NO	O	NO	NO	NO	NO	NO	NO	NA	NA	27.79	NA	1226	0	1227	0	1321	29	1321	0.0219531	6.67477e-09	14	14	Artifact (11)
IT_12	2	25467144	C	CG	DNMT3A	ENST00000264709	frameshift_variant	aag/aaCg|p.Lys577fs/c.1730_1731insC	3081	40	3083	0.0129744	0	0	0	0	1	0	0	0	1	NO	NO	NO	NO	O	NO	NO	NO	NO	NO	NO	NA	NA	27.82	NA	1528	2	1528	0.0013089	1553	38	1555	0.0244373	1.52871e-09	14	14	Artifact (11)
IT_06	2	25467144	C	CG	DNMT3A	ENST00000264709	frameshift_variant	aag/aaCg|p.Lys577fs/c.1730_1731insC	2781	28	2782	0.0100647	0	0	0	0	1	0	0	0	1	NO	NO	NO	NO	O	NO	NO	NO	NO	NO	NO	NA	NA	26.42	NA	1354	0	1354	0	1427	28	1428	0.0196078	9.98142e-09	14	14	Artifact (11)
IT_18	2	25467144	C	CG	DNMT3A	ENST00000264709	frameshift_variant	aag/aaCg|p.Lys577fs/c.1730_1731insC	1864	21	1864	0.0112661	0	0	0	0	1	0	0	0	1	NO	NO	NO	NO	O	NO	NO	NO	NO	NO	NO	NA	NA	27.36	NA	893	2	893	0.00223964	971	19	971	0.0195675	0.000282049	14	14	Artifact (11)
IT_23	2	25467149	T	TG	DNMT3A	ENST00000264709	frameshift_variant	gcc/gCcc|p.Ile576fs/c.1723_1724insC	1841	36	1841	0.0195546	0	0	0	0	1	0	0	0	1	NO	NO	NO	NA	NA	NO	NO	NO	NO	NO	NO	NA	NA	27.94	NA	884	4	884	0.00452489	957	32	957	0.0334378	4.73542e-06	14	15	Artifact (12)
IT_01	2	25467149	T	TG	DNMT3A	ENST00000264709	frameshift_variant	gcc/gCcc|p.Ile576fs/c.1723_1724insC	1387	27	1389	0.0194384	0	0	0	0	1	0	0	0	1	NO	NO	NO	NA	NA	NO	NO	NO	NO	NO	NO	NA	NA	27.63	NA	651	2	651	0.0030722	736	25	738	0.0338753	1.69036e-05	14	15	Artifact (12)
IT_10	2	25467149	T	TG	DNMT3A	ENST00000264709	frameshift_variant	gcc/gCcc|p.Ile576fs/c.1723_1724insC	2029	24	2032	0.011811	0	0	0	0	1	0	0	0	1	NO	NO	NO	NA	NA	NO	NO	NO	NO	NO	NO	NA	NA	28.52	NA	1037	2	1040	0.00192308	992	22	992	0.0221774	1.44525e-05	14	15	Artifact (12)
IT_12	2	25467149	T	TG	DNMT3A	ENST00000264709	frameshift_variant	gcc/gCcc|p.Ile576fs/c.1723_1724insC	3079	43	3086	0.0139339	0	0	0	0	1	0	0	0	1	NO	NO	NO	NA	NA	NO	NO	NO	NO	NO	NO	NA	NA	29.69	NA	1524	3	1526	0.00196592	1555	40	1560	0.025641	3.26258e-09	14	15	Artifact (12)
IT_06	2	25467149	T	TG	DNMT3A	ENST00000264709	frameshift_variant	gcc/gCcc|p.Ile576fs/c.1723_1724insC	2784	43	2785	0.0154399	0	0	0	0	1	0	0	0	1	NO	NO	NO	NA	NA	NO	NO	NO	NO	NO	NO	NA	NA	28.26	NA	1351	3	1351	0.00222058	1433	40	1434	0.027894	8.27123e-09	14	15	Artifact (12)
IT_18	2	25467149	T	TG	DNMT3A	ENST00000264709	frameshift_variant	gcc/gCcc|p.Ile576fs/c.1723_1724insC	1869	33	1870	0.0176471	0	0	0	0	1	0	0	0	1	NO	NO	NO	NA	NA	NO	NO	NO	NO	NO	NO	NA	NA	28.41	NA	889	8	890	0.00898876	980	25	980	0.0255102	0.00800296	14	15	Artifact (11)
IT_19	2	25467149	T	TG	DNMT3A	ENST00000264709	frameshift_variant	gcc/gCcc|p.Ile576fs/c.1723_1724insC	2995	56	2996	0.0186916	0	0	0	0	1	0	0	0	1	NO	NO	NO	NA	NA	NO	NO	NO	NO	NO	NO	NA	NA	28.85	NA	1277	7	1277	0.0054816	1718	49	1719	0.0285049	1.78613e-06	14	15	Artifact (12)
IT_07	2	25467157	T	TG	DNMT3A	ENST00000264709	frameshift_variant	gcc/gcCc|p.Gln573fs/c.1715dupC	1457	25	1460	0.0171233	0	0	0	0	1	0	0	0	1	NO	NO	NO	NA	NA	NO	NO	NO	NO	NO	NO	NA	NA	24.28	NA	697	0	699	0	760	25	761	0.0328515	1.10121e-07	8	32	Artifact (9)
IT_08	2	25467157	T	TG	DNMT3A	ENST00000264709	frameshift_variant	gcc/gcCc|p.Gln573fs/c.1715dupC	1338	32	1343	0.0238273	0	0	0	0	1	0	0	0	1	NO	NO	NO	NA	NA	NO	NO	NO	NO	NO	NO	NA	NA	23.7	NA	617	0	622	0	721	32	721	0.0443828	3.77345e-09	8	32	Artifact (7)
IT_09	2	25467157	T	TG	DNMT3A	ENST00000264709	frameshift_variant	gcc/gcCc|p.Gln573fs/c.1715dupC	2106	45	2112	0.0213068	0	0	0	0	1	0	0	0	1	NO	NO	NO	NA	NA	NO	NO	NO	NO	NO	NO	NA	NA	24.2	NA	1002	0	1005	0	1104	45	1107	0.0406504	4.0728e-13	8	32	Artifact (7)
IT_12	2	25467157	T	TG	DNMT3A	ENST00000264709	frameshift_variant	gcc/gcCc|p.Gln573fs/c.1715dupC	3089	40	3096	0.0129199	0	0	0	0	1	0	0	0	1	NO	NO	NO	NA	NA	NO	NO	NO	NO	NO	NO	NA	NA	24.76	NA	1518	0	1523	0	1571	40	1573	0.0254291	2.52178e-12	8	32	Artifact (9)
IT_13	2	25467157	T	TG	DNMT3A	ENST00000264709	frameshift_variant	gcc/gcCc|p.Gln573fs/c.1715dupC	1315	21	1315	0.0159696	0	0	0	0	1	0	0	0	1	NO	NO	NO	NA	NA	NO	NO	NO	NO	NO	NO	NA	NA	24.19	NA	643	1	643	0.00155521	672	20	672	0.0297619	2.27459e-05	8	32	Artifact (9)
IT_05	2	25467157	T	TG	DNMT3A	ENST00000264709	frameshift_variant	gcc/gcCc|p.Gln573fs/c.1715dupC	1758	21	1762	0.0119183	0	0	0	0	1	0	0	0	1	NO	NO	NO	NA	NA	NO	NO	NO	NO	NO	NO	NA	NA	24.08	NA	811	0	814	0	947	21	948	0.0221519	4.13431e-06	8	32	Artifact (9)
IT_06	2	25467157	T	TG	DNMT3A	ENST00000264709	frameshift_variant	gcc/gcCc|p.Gln573fs/c.1715dupC	2794	42	2801	0.0149946	0	0	0	0	1	0	0	0	1	NO	NO	NO	NA	NA	NO	NO	NO	NO	NO	NO	NA	NA	24.03	NA	1347	0	1350	0	1447	42	1451	0.0289456	2.25346e-12	8	32	Artifact (9)
IT_23	2	25467157	TG	T	DNMT3A	ENST00000264709	frameshift_variant	cag/|p.Gln573fs/c.1717delC	1550	299	1852	0.161447	1	1	0	0	1	1	0	0	4	NO	NO	NO	NA	NA	NO	NO	NO	NO	NO	NO	NA	NA	20.5	NA	579	299	881	0.339387	971	0	971	0	1.98229e-111	24	32	Artifact (6)
IT_24	2	25467157	TG	T	DNMT3A	ENST00000264709	frameshift_variant	cag/|p.Gln573fs/c.1717delC	335	108	445	0.242697	0	1	0	0	1	1	0	0	3	NO	NO	NO	NA	NA	NO	NO	NO	NO	NO	NO	NA	NA	19.26	NA	107	104	213	0.488263	228	4	232	0.0172414	6.73401e-36	24	32	Artifact (7)
IT_01	2	25467157	TG	T	DNMT3A	ENST00000264709	frameshift_variant	cag/|p.Gln573fs/c.1717delC	1247	145	1395	0.103943	0	1	0	0	1	1	0	0	3	NO	NO	NO	NA	NA	NO	NO	NO	NO	NO	NO	NA	NA	20.13	NA	501	142	645	0.220155	746	3	750	0.004	2.08219e-47	24	32	Artifact (7)
IT_02	2	25467157	TG	T	DNMT3A	ENST00000264709	frameshift_variant	cag/|p.Gln573fs/c.1717delC	314	31	346	0.0895954	0	1	0	0	1	1	0	0	3	NO	NO	NO	NA	NA	NO	NO	NO	NO	NO	NO	NA	NA	21.39	NA	137	30	168	0.178571	177	1	178	0.00561798	1.75507e-09	24	32	Artifact (8)
IT_03	2	25467157	TG	T	DNMT3A	ENST00000264709	frameshift_variant	cag/|p.Gln573fs/c.1717delC	399	56	455	0.123077	0	1	0	0	1	1	0	0	3	NO	NO	NO	NA	NA	NO	NO	NO	NO	NO	NO	NA	NA	19.38	NA	153	54	207	0.26087	246	2	248	0.00806452	2.69885e-18	24	32	Artifact (7)
IT_04	2	25467157	TG	T	DNMT3A	ENST00000264709	frameshift_variant	cag/|p.Gln573fs/c.1717delC	447	52	501	0.103792	0	1	0	0	1	1	0	0	3	NO	NO	NO	NA	NA	NO	NO	NO	NO	NO	NO	NA	NA	18.81	NA	194	52	246	0.211382	253	0	255	0	5.0053e-18	24	32	Artifact (7)
IT_07	2	25467157	TG	T	DNMT3A	ENST00000264709	frameshift_variant	cag/|p.Gln573fs/c.1717delC	1286	174	1462	0.119015	0	1	0	0	1	1	0	0	3	NO	NO	NO	NA	NA	NO	NO	NO	NO	NO	NO	NA	NA	20.05	NA	524	173	699	0.247496	762	1	763	0.00131062	8.43001e-60	24	32	Artifact (7)
IT_08	2	25467157	TG	T	DNMT3A	ENST00000264709	frameshift_variant	cag/|p.Gln573fs/c.1717delC	1169	173	1343	0.128816	0	1	0	0	1	1	0	0	3	NO	NO	NO	NA	NA	NO	NO	NO	NO	NO	NO	NA	NA	19.45	NA	449	173	622	0.278135	720	0	721	0	5.63747e-65	24	32	Artifact (7)
IT_09	2	25467157	TG	T	DNMT3A	ENST00000264709	frameshift_variant	gcc/|p.Gln573fs/c.1716delC	1864	246	2117	0.116202	0	0	0	0	1	1	0	0	2	NO	NO	NO	NA	NA	NO	NO	NO	NO	NO	NO	NA	NA	19.87	NA	758	245	1006	0.243539	1106	1	1111	0.00090009	1.97352e-85	24	32	Artifact (7)
IT_10	2	25467157	TG	T	DNMT3A	ENST00000264709	frameshift_variant	cag/|p.Gln573fs/c.1717delC	1756	273	2032	0.13435	0	1	0	0	1	1	0	0	3	NO	NO	NO	NA	NA	NO	NO	NO	NO	NO	NO	NA	NA	19.81	NA	757	271	1030	0.263107	999	2	1002	0.00199601	1.78803e-85	24	32	Artifact (7)
IT_11	2	25467157	TG	T	DNMT3A	ENST00000264709	frameshift_variant	cag/|p.Gln573fs/c.1717delC	2113	441	2556	0.172535	1	0	0	0	1	1	0	0	3	NO	NO	NO	NA	NA	NO	NO	NO	NO	NO	NO	NA	NA	20.33	NA	785	434	1220	0.355738	1328	7	1336	0.00523952	3.92909e-148	24	32	Artifact (7)
IT_12	2	25467157	TG	T	DNMT3A	ENST00000264709	frameshift_variant	cag/|p.Gln573fs/c.1717delC	2606	489	3096	0.157946	0	1	0	0	1	1	0	0	3	NO	NO	NO	NA	NA	NO	NO	NO	NO	NO	NO	NA	NA	20.48	NA	1042	480	1523	0.315167	1564	9	1573	0.00572155	6.15027e-152	24	32	Artifact (7)
IT_13	2	25467157	TG	T	DNMT3A	ENST00000264709	frameshift_variant	cag/|p.Gln573fs/c.1717delC	1077	240	1317	0.182232	0	1	0	0	1	1	0	0	3	NO	NO	NO	NA	NA	NO	NO	NO	NO	NO	NO	NA	NA	19.68	NA	408	235	643	0.365474	669	5	674	0.0074184	1.59346e-76	24	32	Artifact (7)
IT_14	2	25467157	TG	T	DNMT3A	ENST00000264709	frameshift_variant	cag/|p.Gln573fs/c.1717delC	866	171	1040	0.164423	0	1	0	0	1	1	0	0	3	NO	NO	NO	NA	NA	NO	NO	NO	NO	NO	NO	NA	NA	19.55	NA	346	167	514	0.324903	520	4	526	0.00760456	3.18281e-52	24	32	Artifact (7)
IT_15	2	25467157	TG	T	DNMT3A	ENST00000264709	frameshift_variant	cag/|p.Gln573fs/c.1717delC	812	174	988	0.176113	0	1	0	0	1	1	0	0	3	NO	NO	NO	NA	NA	NO	NO	NO	NO	NO	NO	NA	NA	21.04	NA	272	171	444	0.385135	540	3	544	0.00551471	1.81696e-64	24	32	Artifact (7)
IT_16	2	25467157	TG	T	DNMT3A	ENST00000264709	frameshift_variant	cag/|p.Gln573fs/c.1717delC	97	22	119	0.184874	0	1	0	0	1	1	0	0	3	NO	NO	NO	NA	NA	NO	NO	NO	NO	NO	NO	NA	NA	19.99	NA	31	21	52	0.403846	66	1	67	0.0149254	2.54738e-08	24	32	Artifact (7)
IT_05	2	25467157	TG	T	DNMT3A	ENST00000264709	frameshift_variant	cag/|p.Gln573fs/c.1717delC	1587	173	1762	0.0981839	0	1	0	0	1	1	0	0	3	NO	NO	NO	NA	NA	NO	NO	NO	NO	NO	NO	NA	NA	19.24	NA	644	168	814	0.206388	943	5	948	0.00527426	1.05587e-53	24	32	Artifact (8)
IT_06	2	25467157	TG	T	DNMT3A	ENST00000264709	frameshift_variant	cag/|p.Gln573fs/c.1717delC	2531	268	2804	0.0955777	0	1	0	0	1	1	0	0	3	NO	NO	NO	NA	NA	NO	NO	NO	NO	NO	NO	NA	NA	19.26	NA	1086	262	1350	0.194074	1445	6	1454	0.00412655	8.00856e-80	24	32	Artifact (8)
IT_17	2	25467157	TG	T	DNMT3A	ENST00000264709	frameshift_variant	cag/|p.Gln573fs/c.1717delC	1082	300	1386	0.21645	0	1	0	0	1	1	0	0	3	NO	NO	NO	NA	NA	NO	NO	NO	NO	NO	NO	NA	NA	19.5	NA	385	297	685	0.433577	697	3	701	0.0042796	6.8182e-104	24	32	Artifact (7)
IT_18	2	25467157	TG	T	DNMT3A	ENST00000264709	frameshift_variant	cag/|p.Gln573fs/c.1717delC	1579	299	1883	0.158789	1	1	0	0	1	1	0	0	4	NO	NO	NO	NA	NA	NO	NO	NO	NO	NO	NO	NA	NA	19.56	NA	586	296	886	0.334086	993	3	997	0.00300903	1.42858e-105	24	32	Artifact (6)
IT_19	2	25467157	TG	T	DNMT3A	ENST00000264709	frameshift_variant	gcc/|p.Gln573fs/c.1716delC	2783	219	3005	0.0728785	0	0	0	0	1	1	0	0	2	NO	NO	NO	NA	NA	NO	NO	NO	NO	NO	NO	NA	NA	20.9	NA	1055	214	1271	0.168371	1728	5	1734	0.00288351	4.47393e-77	24	32	Artifact (8)
IT_21	2	25467157	TG	T	DNMT3A	ENST00000264709	frameshift_variant	cag/|p.Gln573fs/c.1717delC	529	106	635	0.166929	0	1	0	0	1	1	0	0	3	NO	NO	NO	NA	NA	NO	NO	NO	NO	NO	NO	NA	NA	19.82	NA	210	104	314	0.33121	319	2	321	0.00623053	1.18826e-33	24	32	Artifact (7)
IT_22	2	25467157	TG	T	DNMT3A	ENST00000264709	frameshift_variant	cag/|p.Gln573fs/c.1717delC	2437	520	2962	0.175557	1	1	0	0	1	1	0	0	4	NO	NO	NO	NA	NA	NO	NO	NO	NO	NO	NO	NA	NA	19.68	NA	843	507	1354	0.374446	1594	13	1608	0.00808458	5.68382e-178	24	32	Artifact (5)
IT_09	2	25467163	G	GC	DNMT3A	ENST00000264709	frameshift_variant	ccg/ccGg|p.Ala571fs/c.1706_1707insG	2116	41	2118	0.0193579	0	0	0	0	1	0	0	0	1	NO	NO	NO	NA	NA	NO	NO	NO	NO	NO	NO	NA	NA	24.74	NA	1002	3	1002	0.00299401	1114	38	1116	0.0340502	7.36719e-08	12	33	Artifact (9)
IT_10	2	25467163	G	GC	DNMT3A	ENST00000264709	frameshift_variant	ccg/ccGg|p.Ala571fs/c.1706_1707insG	2029	32	2030	0.0157635	0	0	0	0	1	0	0	0	1	NO	NO	NO	NA	NA	NO	NO	NO	NO	NO	NO	NA	NA	25.12	NA	1022	6	1023	0.0058651	1007	26	1007	0.0258193	0.000486671	12	33	Artifact (9)
IT_18	2	25467163	G	GC	DNMT3A	ENST00000264709	frameshift_variant	ccg/ccGg|p.Ala571fs/c.1706_1707insG	1880	27	1893	0.0142631	0	0	0	0	1	0	0	0	1	NO	NO	NO	NA	NA	NO	NO	NO	NO	NO	NO	NA	NA	24.56	NA	884	17	884	0.0192308	996	10	1009	0.0099108	0.120631	12	33	Artifact (8)
IT_23	2	25467163	GC	G	DNMT3A	ENST00000264709	frameshift_variant	ccg/|p.Ala571fs/c.1707delG	1803	50	1855	0.0269542	0	0	0	0	1	0	0	0	1	NO	NO	NO	NA	NA	NO	NO	NO	NO	NO	NO	NA	NA	19.68	NA	870	7	878	0.00797267	933	43	977	0.0440123	8.36051e-07	21	33	Artifact (10)
IT_01	2	25467163	GC	G	DNMT3A	ENST00000264709	frameshift_variant	ccg/|p.Ala571fs/c.1707delG	1363	37	1403	0.0263721	0	0	0	0	1	0	0	0	1	NO	NO	NO	NA	NA	NO	NO	NO	NO	NO	NO	NA	NA	18.1	NA	624	15	639	0.0234742	739	22	764	0.0287958	0.616853	21	33	Artifact (9)
IT_07	2	25467163	GC	G	DNMT3A	ENST00000264709	frameshift_variant	ccg/|p.Ala571fs/c.1707delG	1386	71	1460	0.0486301	0	0	0	0	1	0	0	0	1	NO	NO	NO	NA	NA	NO	NO	NO	NO	NO	NO	NA	NA	17.63	NA	673	20	695	0.028777	713	51	765	0.0666667	0.00089188	21	33	Artifact (9)
IT_08	2	25467163	GC	G	DNMT3A	ENST00000264709	frameshift_variant	ccg/|p.Ala571fs/c.1707delG	1294	46	1341	0.0343028	0	0	0	0	1	0	0	0	1	NO	NO	NO	NA	NA	NO	NO	NO	NO	NO	NO	NA	NA	17.42	NA	606	7	614	0.0114007	688	39	727	0.0536451	1.39739e-05	21	33	Artifact (10)
IT_09	2	25467163	GC	G	DNMT3A	ENST00000264709	frameshift_variant	ccg/|p.Ala571fs/c.1707delG	2056	63	2122	0.029689	0	0	0	0	1	0	0	0	1	NO	NO	NO	NA	NA	NO	NO	NO	NO	NO	NO	NA	NA	17.93	NA	950	51	1002	0.0508982	1106	12	1120	0.0107143	4.72191e-08	21	33	Artifact (9)
IT_10	2	25467163	GC	G	DNMT3A	ENST00000264709	frameshift_variant	ccg/|p.Ala571fs/c.1707delG	1979	52	2034	0.0255654	0	0	0	0	1	0	0	0	1	NO	NO	NO	NA	NA	NO	NO	NO	NO	NO	NO	NA	NA	18.63	NA	975	44	1022	0.0430528	1004	8	1012	0.00790514	2.95129e-07	21	33	Artifact (10)
IT_11	2	25467163	GC	G	DNMT3A	ENST00000264709	frameshift_variant	ccg/|p.Ala571fs/c.1707delG	2493	65	2559	0.0254005	0	0	0	0	1	0	0	0	1	NO	NO	NO	NA	NA	NO	NO	NO	NO	NO	NO	NA	NA	19.63	NA	1190	25	1216	0.0205592	1303	40	1343	0.0297841	0.166196	21	33	Artifact (9)
IT_12	2	25467163	GC	G	DNMT3A	ENST00000264709	frameshift_variant	ccg/|p.Ala571fs/c.1707delG	3052	49	3104	0.0157861	0	0	0	0	1	0	0	0	1	NO	NO	NO	NA	NA	NO	NO	NO	NO	NO	NO	NA	NA	20.05	NA	1502	14	1517	0.00922874	1550	35	1587	0.0220542	0.00564889	21	33	Artifact (11)
IT_15	2	25467163	GC	G	DNMT3A	ENST00000264709	frameshift_variant	ccg/|p.Ala571fs/c.1707delG	969	25	995	0.0251256	0	0	0	0	1	0	0	0	1	NO	NO	NO	NA	NA	NO	NO	NO	NO	NO	NO	NA	NA	18.59	NA	429	12	441	0.0272109	540	13	554	0.0234657	0.838969	21	33	Artifact (9)
IT_05	2	25467163	GC	G	DNMT3A	ENST00000264709	frameshift_variant	ccg/|p.Ala571fs/c.1707delG	1718	47	1766	0.0266138	0	0	0	0	1	0	0	0	1	NO	NO	NO	NA	NA	NO	NO	NO	NO	NO	NO	NA	NA	18.94	NA	798	12	811	0.0147965	920	35	955	0.0366492	0.00456242	21	33	Artifact (9)
IT_06	2	25467163	GC	G	DNMT3A	ENST00000264709	frameshift_variant	ccg/|p.Ala571fs/c.1707delG	2750	66	2819	0.0234126	0	0	0	0	1	0	0	0	1	NO	NO	NO	NA	NA	NO	NO	NO	NO	NO	NO	NA	NA	19.2	NA	1324	21	1346	0.0156018	1426	45	1473	0.0305499	0.00877549	21	33	Artifact (9)
IT_17	2	25467163	GC	G	DNMT3A	ENST00000264709	frameshift_variant	ccg/|p.Ala571fs/c.1707delG	1373	24	1398	0.0171674	0	0	0	0	1	0	0	0	1	NO	NO	NO	NA	NA	NO	NO	NO	NO	NO	NO	NA	NA	18.98	NA	667	15	682	0.0219941	706	9	716	0.0125698	0.217536	21	33	Artifact (11)
IT_18	2	25467163	GC	G	DNMT3A	ENST00000264709	frameshift_variant	ccg/|p.Ala571fs/c.1707delG	1862	39	1903	0.020494	0	0	0	0	1	0	0	0	1	NO	NO	NO	NA	NA	NO	NO	NO	NO	NO	NO	NA	NA	18.74	NA	859	24	884	0.0271493	1003	15	1019	0.0147203	0.0732645	21	33	Artifact (9)
IT_19	2	25467163	GC	G	DNMT3A	ENST00000264709	frameshift_variant	ccg/|p.Ala571fs/c.1707delG	2967	43	3011	0.014281	0	0	0	0	1	0	0	0	1	NO	NO	NO	NA	NA	NO	NO	NO	NO	NO	NO	NA	NA	19.09	NA	1257	9	1266	0.007109	1710	34	1745	0.0194842	0.00467481	21	33	Artifact (11)
IT_22	2	25467163	GC	G	DNMT3A	ENST00000264709	frameshift_variant	ccg/|p.Ala571fs/c.1707delG	2861	113	2978	0.0379449	0	0	0	0	1	0	0	0	1	NO	NO	NO	NA	NA	NO	NO	NO	NO	NO	NO	NA	NA	19.18	NA	1341	12	1353	0.00886918	1520	101	1625	0.0621538	6.04026e-16	21	33	Artifact (9)
IT_18	2	25467170	G	GC	DNMT3A	ENST00000264709	frameshift_variant	ggg/gGgg|p.Pro569fs/c.1702dupG	1908	23	1919	0.0119854	0	0	0	0	1	0	0	0	1	NO	NO	NO	NA	NA	NO	NO	NO	NO	NO	NO	NA	NA	25.43	NA	875	10	878	0.0113895	1033	13	1041	0.012488	0.837337	3	9	Artifact (6)
IT_10	2	25467170	GC	G	DNMT3A	ENST00000264709	frameshift_variant	ggg/|p.Pro569fs/c.1703delG	2009	21	2044	0.010274	0	0	0	0	1	0	0	0	1	NO	NO	NO	NA	NA	NO	NO	NO	NO	NO	NO	NA	NA	22.32	NA	987	13	1010	0.0128713	1022	8	1034	0.00773694	0.277722	6	9	Artifact (8)
IT_23	2	25467175	A	AC	DNMT3A	ENST00000264709	frameshift_variant	ttg/ttGg|p.Val567fs/c.1697_1698insG	1857	26	1859	0.013986	0	0	0	0	1	0	0	0	1	NO	NO	NO	NA	NA	NO	NO	NO	NO	NO	NO	NA	NA	28.34	NA	866	16	866	0.0184758	991	10	993	0.0100705	0.165727	3	3	Artifact (5)
IT_18	2	25467175	A	AC	DNMT3A	ENST00000264709	frameshift_variant	ttg/ttGg|p.Val567fs/c.1697_1698insG	1916	22	1921	0.0114524	0	0	0	0	1	0	0	0	1	NO	NO	NO	NA	NA	NO	NO	NO	NO	NO	NO	NA	NA	27.33	NA	868	11	872	0.0126147	1048	11	1049	0.0104862	0.672962	3	3	Artifact (5)
IT_17	2	25467184	T	TC	DNMT3A	ENST00000264709	frameshift_variant	gtg/gtGg|p.Asp564fs/c.1688_1689insG	1411	39	1415	0.0275618	0	0	0	0	1	0	0	0	1	NO	NO	NO	NO	O	NO	NO	NO	NO	NO	NO	NA	NA	28.67	NA	667	39	668	0.0583832	744	0	747	0	3.71208e-13	1	1	Artifact (4)
IT_09	2	25467193	T	TC	DNMT3A	ENST00000264709	frameshift_variant	gtg/gtGg|p.Glu561fs/c.1679_1680insG	2101	42	2102	0.019981	0	0	0	0	1	0	0	0	1	NO	NO	NO	NO	O	NO	NO	NO	NO	NO	NO	NA	NA	27.38	NA	965	40	965	0.0414508	1136	2	1137	0.00175901	1.40821e-11	3	4	Artifact (7)
IT_13	2	25467193	T	TC	DNMT3A	ENST00000264709	frameshift_variant	gtg/gtGg|p.Glu561fs/c.1679_1680insG	1356	54	1358	0.0397644	0	0	0	0	1	0	0	0	1	NO	NO	NO	NO	O	NO	NO	NO	NO	NO	NO	NA	NA	28.69	NA	606	53	607	0.0873147	750	1	751	0.00133156	2.95638e-17	3	4	Artifact (5)
IT_23	2	25467195	C	CA	DNMT3A	ENST00000264709	frameshift_variant	gtg/gTtg|p.Glu561fs/c.1678_1679insT	1857	48	1857	0.0258481	0	0	0	0	1	0	0	0	1	NO	NO	NO	NO	O	NO	NO	NO	NO	NO	NO	NA	NA	24.94	NA	854	0	854	0	1003	48	1003	0.0478564	2.61911e-13	11	11	Artifact (6)
IT_07	2	25467195	C	CA	DNMT3A	ENST00000264709	frameshift_variant	gtg/gTtg|p.Glu561fs/c.1678_1679insT	1460	29	1460	0.019863	0	0	0	0	1	0	0	0	1	NO	NO	NO	NO	O	NO	NO	NO	NO	NO	NO	NA	NA	24.92	NA	679	3	679	0.00441826	781	26	781	0.0332907	8.35551e-05	11	11	Artifact (8)
IT_08	2	25467195	C	CA	DNMT3A	ENST00000264709	frameshift_variant	gtg/gTtg|p.Glu561fs/c.1678_1679insT	1341	34	1341	0.0253542	0	0	0	0	1	0	0	0	1	NO	NO	NO	NO	O	NO	NO	NO	NO	NO	NO	NA	NA	24.58	NA	602	0	602	0	739	34	739	0.0460081	2.66388e-09	11	11	Artifact (6)
IT_10	2	25467195	C	CA	DNMT3A	ENST00000264709	frameshift_variant	gtg/gTtg|p.Glu561fs/c.1678_1679insT	2045	25	2045	0.0122249	0	0	0	0	1	0	0	0	1	NO	NO	NO	NO	O	NO	NO	NO	NO	NO	NO	NA	NA	25.19	NA	1000	0	1000	0	1045	25	1045	0.0239234	7.04578e-08	11	11	Artifact (8)
IT_17	2	25467195	C	CA	DNMT3A	ENST00000264709	frameshift_variant	gtg/gTtg|p.Glu561fs/c.1678_1679insT	1417	39	1417	0.0275229	0	0	0	0	1	0	0	0	1	NO	NO	NO	NO	O	NO	NO	NO	NO	NO	NO	NA	NA	26.23	NA	666	0	666	0	751	39	751	0.0519308	2.99008e-11	11	11	Artifact (6)
IT_18	2	25467195	C	CA	DNMT3A	ENST00000264709	frameshift_variant	gtg/gTtg|p.Glu561fs/c.1678_1679insT	1921	47	1921	0.0244664	0	0	0	0	1	0	0	0	1	NO	NO	NO	NO	O	NO	NO	NO	NO	NO	NO	NA	NA	26.45	NA	857	0	857	0	1064	47	1064	0.0441729	1.60924e-12	11	11	Artifact (6)
IT_19	2	25467195	C	CA	DNMT3A	ENST00000264709	frameshift_variant	gtg/gTtg|p.Glu561fs/c.1678_1679insT	3025	31	3026	0.0102445	0	0	0	0	1	0	0	0	1	NO	NO	NO	NO	O	NO	NO	NO	NO	NO	NO	NA	NA	27.93	NA	1253	0	1254	0	1772	31	1772	0.0174944	8.30049e-08	11	11	Artifact (8)
IT_21	2	25467195	C	CA	DNMT3A	ENST00000264709	frameshift_variant	gtg/gTtg|p.Glu561fs/c.1678_1679insT	636	26	636	0.0408805	0	0	0	0	1	0	0	0	1	NO	NO	NO	NO	O	NO	NO	NO	NO	NO	NO	NA	NA	25.75	NA	302	1	302	0.00331126	334	25	334	0.0748503	2.43574e-06	11	11	Artifact (6)
IT_22	2	25467195	C	CA	DNMT3A	ENST00000264709	frameshift_variant	gtg/gTtg|p.Glu561fs/c.1678_1679insT	3005	138	3005	0.0459235	0	0	0	0	1	1	0	0	2	NO	NO	NO	NO	O	NO	NO	NO	NO	NO	NO	NA	NA	25.51	NA	1340	0	1340	0	1665	138	1665	0.0828829	5.3674e-35	11	11	Artifact (5)
IT_01	2	25467199	C	CA	DNMT3A	ENST00000264709	frameshift_variant	ttt/ttTt|p.Cys559fs/c.1673dupT	1415	34	1417	0.0239944	0	0	0	0	1	0	0	0	1	NO	NO	NO	NO	O	NO	NO	NO	NO	NO	NO	NA	NA	27.67	NA	623	0	624	0	792	34	793	0.0428752	7.26386e-09	12	23	Artifact (7)
IT_09	2	25467199	C	CA	DNMT3A	ENST00000264709	frameshift_variant	ttt/ttTt|p.Cys559fs/c.1673dupT	2101	22	2101	0.0104712	0	0	0	0	1	0	0	0	1	NO	NO	NO	NO	O	NO	NO	NO	NO	NO	NO	NA	NA	27.63	NA	963	0	963	0	1138	22	1138	0.0193322	2.22159e-06	12	23	Artifact (9)
IT_15	2	25467199	C	CA	DNMT3A	ENST00000264709	frameshift_variant	ttt/ttTt|p.Cys559fs/c.1673dupT	995	23	998	0.0230461	0	0	0	0	1	0	0	0	1	NO	NO	NO	NO	O	NO	NO	NO	NO	NO	NO	NA	NA	28.47	NA	420	6	422	0.014218	575	17	576	0.0295139	0.13838	12	23	Artifact (6)
IT_17	2	25467199	C	CA	DNMT3A	ENST00000264709	frameshift_variant	ttt/ttTt|p.Cys559fs/c.1673dupT	1415	57	1415	0.0402827	0	0	0	0	1	0	0	0	1	NO	NO	NO	NO	O	NO	NO	NO	NO	NO	NO	NA	NA	28.1	NA	662	2	662	0.00302115	753	55	753	0.0730412	8.16796e-13	12	23	Artifact (7)
IT_18	2	25467199	C	CA	DNMT3A	ENST00000264709	frameshift_variant	ttt/ttTt|p.Cys559fs/c.1673dupT	1916	56	1920	0.0291667	0	0	0	0	1	0	0	0	1	NO	NO	NO	NO	O	NO	NO	NO	NO	NO	NO	NA	NA	28.06	NA	853	0	854	0	1063	56	1066	0.0525328	1.11365e-14	12	23	Artifact (7)
IT_21	2	25467199	C	CA	DNMT3A	ENST00000264709	frameshift_variant	ttt/ttTt|p.Cys559fs/c.1673dupT	636	30	636	0.0471698	0	0	0	0	1	0	0	0	1	NO	NO	NO	NO	O	NO	NO	NO	NO	NO	NO	NA	NA	28.33	NA	301	3	301	0.00996678	335	27	335	0.080597	3.85129e-05	12	23	Artifact (7)
IT_22	2	25467199	C	CA	DNMT3A	ENST00000264709	frameshift_variant	ttt/ttTt|p.Cys559fs/c.1673dupT	3004	37	3006	0.0123087	0	0	0	0	1	0	0	0	1	NO	NO	NO	NO	O	NO	NO	NO	NO	NO	NO	NA	NA	28.64	NA	1336	5	1337	0.00373972	1668	32	1669	0.0191732	8.79157e-05	12	23	Artifact (9)
IT_23	2	25467199	CA	C	DNMT3A	ENST00000264709	frameshift_variant	ttt/|p.Cys559fs/c.1674delT	1832	22	1857	0.0118471	0	0	0	0	1	0	0	0	1	NO	NO	NO	NO	O	NO	NO	NO	NO	NO	NO	NA	NA	21.63	NA	836	16	852	0.0187793	996	6	1005	0.00597015	0.0161154	11	23	Artifact (8)
IT_01	2	25467199	CA	C	DNMT3A	ENST00000264709	frameshift_variant	ttt/|p.Cys559fs/c.1674delT	1391	27	1419	0.0190275	0	0	0	0	1	0	0	0	1	NO	NO	NO	NO	O	NO	NO	NO	NO	NO	NO	NA	NA	22.03	NA	605	19	625	0.0304	786	8	794	0.0100756	0.00598342	11	23	Artifact (8)
IT_09	2	25467199	CA	C	DNMT3A	ENST00000264709	frameshift_variant	ttt/|p.Cys559fs/c.1674delT	2074	26	2101	0.0123751	0	0	0	0	1	0	0	0	1	NO	NO	NO	NO	O	NO	NO	NO	NO	NO	NO	NA	NA	21.9	NA	948	14	963	0.0145379	1126	12	1138	0.0105448	0.433908	11	23	Artifact (8)
IT_10	2	25467199	CA	C	DNMT3A	ENST00000264709	frameshift_variant	ttt/|p.Cys559fs/c.1674delT	2019	26	2051	0.0126767	0	0	0	0	1	0	0	0	1	NO	NO	NO	NO	O	NO	NO	NO	NO	NO	NO	NA	NA	22.55	NA	980	16	1001	0.015984	1039	10	1050	0.00952381	0.236515	11	23	Artifact (8)
IT_11	2	25467199	CA	C	DNMT3A	ENST00000264709	frameshift_variant	ttt/|p.Cys559fs/c.1674delT	2543	27	2570	0.0105058	0	0	0	0	1	0	0	0	1	NO	NO	NO	NO	O	NO	NO	NO	NO	NO	NO	NA	NA	25.92	NA	1194	7	1201	0.00582848	1349	20	1369	0.0146092	0.0328053	11	23	Artifact (8)
IT_13	2	25467199	CA	C	DNMT3A	ENST00000264709	frameshift_variant	ttt/|p.Cys559fs/c.1674delT	1340	20	1363	0.0146735	0	0	0	0	1	0	0	0	1	NO	NO	NO	NO	O	NO	NO	NO	NO	NO	NO	NA	NA	24.77	NA	605	2	608	0.00328947	735	18	755	0.0238411	0.00118549	11	23	Artifact (9)
IT_19	2	25467416	A	T	DNMT3A	ENST00000264709	missense_variant	Tgc/Agc|p.Cys554Ser/c.1660T>A	1761	22	1786	0.012318	0	0	0	0	1	0	0	1	2	NO	NO	NO	NA	NA	NO	NO	NO	NO	NO	NO	-9.071	Deleterious	28.48	33.32	840	5	848	0.00589623	921	17	938	0.0181237	0.0293845	1	1	Artifact (2)
IT_23	2	25467417	G	GT	DNMT3A	ENST00000264709	frameshift_variant	aac/aacA|p.Asn553fs/c.1656_1657insA	1063	59	1063	0.0555033	0	0	0	0	1	0	0	0	1	NO	NO	NO	NA	NA	NO	NO	NO	NO	NO	NO	NA	NA	28.1	NA	560	2	560	0.00357143	503	57	503	0.11332	7.09717e-16	23	23	Artifact (8)
IT_01	2	25467417	G	GT	DNMT3A	ENST00000264709	frameshift_variant	aac/aacA|p.Asn553fs/c.1656_1657insA	1612	55	1613	0.034098	0	0	0	0	1	0	0	0	1	NO	NO	NO	NA	NA	NO	NO	NO	NO	NO	NO	NA	NA	28.41	NA	847	1	847	0.00118064	765	54	766	0.0704961	2.81774e-16	23	23	Artifact (9)
IT_03	2	25467417	G	GT	DNMT3A	ENST00000264709	frameshift_variant	aac/aacA|p.Asn553fs/c.1656_1657insA	386	26	386	0.0673575	0	0	0	0	1	0	0	0	1	NO	NO	NO	NA	NA	NO	NO	NO	NO	NO	NO	NA	NA	28.01	NA	193	0	193	0	193	26	193	0.134715	3.59656e-08	23	23	Artifact (8)
IT_04	2	25467417	G	GT	DNMT3A	ENST00000264709	frameshift_variant	aac/aacA|p.Asn553fs/c.1656_1657insA	406	30	406	0.0738916	0	0	0	0	1	0	0	0	1	NO	NO	NO	NA	NA	NO	NO	NO	NO	NO	NO	NA	NA	27.68	NA	211	0	211	0	195	30	195	0.153846	9.93203e-10	23	23	Artifact (8)
IT_07	2	25467417	G	GT	DNMT3A	ENST00000264709	frameshift_variant	aac/aacA|p.Asn553fs/c.1656_1657insA	606	23	607	0.0378913	0	0	0	0	1	0	0	0	1	NO	NO	NO	NA	NA	NO	NO	NO	NO	NO	NO	NA	NA	28.34	NA	319	6	320	0.01875	287	17	287	0.0592334	0.017681	23	23	Artifact (8)
IT_09	2	25467417	G	GT	DNMT3A	ENST00000264709	frameshift_variant	aac/aacA|p.Asn553fs/c.1656_1657insA	1347	65	1348	0.0482196	0	0	0	0	1	0	0	0	1	NO	NO	NO	NA	NA	NO	NO	NO	NO	NO	NO	NA	NA	27.72	NA	689	7	689	0.0101597	658	58	659	0.0880121	2.13569e-11	23	23	Artifact (9)
IT_10	2	25467417	G	GT	DNMT3A	ENST00000264709	frameshift_variant	aac/aacA|p.Asn553fs/c.1656_1657insA	1367	63	1368	0.0460526	0	0	0	0	1	0	0	0	1	NO	NO	NO	NA	NA	NO	NO	NO	NO	NO	NO	NA	NA	28.14	NA	669	2	670	0.00298507	698	61	698	0.0873926	3.05467e-15	23	23	Artifact (9)
IT_11	2	25467417	G	GT	DNMT3A	ENST00000264709	frameshift_variant	aac/aacA|p.Asn553fs/c.1656_1657insA	1210	27	1212	0.0222772	0	0	0	0	1	0	0	0	1	NO	NO	NO	NA	NA	NO	NO	NO	NO	NO	NO	NA	NA	30.86	NA	591	2	592	0.00337838	619	25	620	0.0403226	6.77018e-06	23	23	Artifact (9)
IT_12	2	25467417	G	GT	DNMT3A	ENST00000264709	frameshift_variant	aac/aacA|p.Asn553fs/c.1656_1657insA	1804	55	1806	0.030454	0	0	0	0	1	0	0	0	1	NO	NO	NO	NA	NA	NO	NO	NO	NO	NO	NO	NA	NA	30.83	NA	929	0	930	0	875	55	876	0.0627854	2.43851e-17	23	23	Artifact (9)
IT_13	2	25467417	G	GT	DNMT3A	ENST00000264709	frameshift_variant	aac/aacA|p.Asn553fs/c.1656_1657insA	709	25	709	0.0352609	0	0	0	0	1	0	0	0	1	NO	NO	NO	NA	NA	NO	NO	NO	NO	NO	NO	NA	NA	30.27	NA	341	0	341	0	368	25	368	0.0679348	2.07575e-07	23	23	Artifact (9)
IT_14	2	25467417	G	GT	DNMT3A	ENST00000264709	frameshift_variant	aac/aacA|p.Asn553fs/c.1656_1657insA	620	20	620	0.0322581	0	0	0	0	1	0	0	0	1	NO	NO	NO	NA	NA	NO	NO	NO	NO	NO	NO	NA	NA	29.89	NA	319	3	319	0.00940439	301	17	301	0.0564784	0.00119413	23	23	Artifact (8)
IT_15	2	25467417	G	GT	DNMT3A	ENST00000264709	frameshift_variant	aac/aaAc|p.Asn553fs/c.1658dupA	553	32	555	0.0576577	1	0	0	0	1	0	0	0	2	NO	NO	NO	NA	NA	NO	NO	NO	NO	NO	NO	NA	NA	27.9	NA	298	4	300	0.0133333	255	28	255	0.109804	4.19371e-06	23	23	Artifact (7)
IT_05	2	25467417	G	GT	DNMT3A	ENST00000264709	frameshift_variant	aac/aacA|p.Asn553fs/c.1656_1657insA	1089	33	1089	0.030303	0	0	0	0	1	0	0	0	1	NO	NO	NO	NA	NA	NO	NO	NO	NO	NO	NO	NA	NA	29.11	NA	568	0	568	0	521	33	521	0.0633397	4.67931e-11	23	23	Artifact (9)
IT_06	2	25467417	G	GT	DNMT3A	ENST00000264709	frameshift_variant	aac/aacA|p.Asn553fs/c.1656_1657insA	1584	35	1584	0.022096	0	0	0	0	1	0	0	0	1	NO	NO	NO	NA	NA	NO	NO	NO	NO	NO	NO	NA	NA	28.94	NA	723	2	723	0.00276625	861	33	861	0.0383275	3.7531e-07	23	23	Artifact (9)
IT_17	2	25467417	G	GT	DNMT3A	ENST00000264709	frameshift_variant	aac/aacA|p.Asn553fs/c.1656_1657insA	790	80	790	0.101266	0	0	0	0	1	1	0	0	2	NO	NO	NO	NA	NA	NO	NO	NO	NO	NO	NO	NA	NA	27.7	NA	359	0	359	0	431	80	431	0.185615	2.18543e-20	23	23	Artifact (6)
IT_18	2	25467417	G	GT	DNMT3A	ENST00000264709	frameshift_variant	aac/aacA|p.Asn553fs/c.1656_1657insA	1000	73	1000	0.073	0	0	0	0	1	1	0	0	2	NO	NO	NO	NA	NA	NO	NO	NO	NO	NO	NO	NA	NA	28.39	NA	535	4	535	0.00747664	465	69	465	0.148387	1.20115e-17	23	23	Artifact (7)
IT_19	2	25467417	G	GT	DNMT3A	ENST00000264709	frameshift_variant	aac/aacA|p.Asn553fs/c.1656_1657insA	1787	159	1788	0.0889262	0	0	0	0	1	1	0	0	2	NO	NO	NO	NA	NA	NO	NO	NO	NO	NO	NO	NA	NA	26.7	NA	847	4	848	0.00471698	940	155	940	0.164894	2.0006e-35	23	23	Artifact (7)
IT_20	2	25467417	G	GT	DNMT3A	ENST00000264709	frameshift_variant	aac/aaAc|p.Asn553fs/c.1658dupA	708	108	708	0.152542	1	0	0	0	1	1	0	0	3	NO	NO	NO	NA	NA	NO	NO	NO	NO	NO	NO	NA	NA	26.41	NA	360	2	360	0.00555556	348	106	348	0.304598	5.42764e-27	23	23	Artifact (6)
IT_22	2	25467417	G	GT	DNMT3A	ENST00000264709	frameshift_variant	aac/aacA|p.Asn553fs/c.1656_1657insA	2703	92	2705	0.0340111	0	0	0	0	1	0	0	0	1	NO	NO	NO	NA	NA	NO	NO	NO	NO	NO	NO	NA	NA	30.44	NA	1394	4	1395	0.00286738	1309	88	1310	0.0671756	1.64405e-22	23	23	Artifact (9)
IT_19	2	25467418	T	C	DNMT3A	ENST00000264709	missense_variant	aAc/aGc|p.Asn553Ser/c.1658A>G	1736	62	1800	0.0344444	0	0	0	0	1	1	0	1	3	NO	NO	NO	NA	NA	NO	NO	NO	8.236e-06	NO	NO	-0.051	Tolerated	24.91	33.4	831	16	848	0.0188679	905	46	952	0.0483193	0.000656225	1	1	Artifact (1)
IT_23	2	25467423	GT	G	DNMT3A	ENST00000264709	frameshift_variant	aac/|p.Asn551fs/c.1651delA	1039	25	1070	0.0233645	0	0	0	0	1	0	0	0	1	NO	NO	NO	NO	O	NO	NO	NO	NO	NO	NO	NA	NA	23.77	NA	556	0	560	0	483	25	510	0.0490196	6.85103e-09	14	14	Artifact (9)
IT_09	2	25467423	GT	G	DNMT3A	ENST00000264709	frameshift_variant	aac/|p.Asn551fs/c.1651delA	1325	28	1358	0.0206186	0	0	0	0	1	0	0	0	1	NO	NO	NO	NO	O	NO	NO	NO	NO	NO	NO	NA	NA	23.22	NA	686	0	686	0	639	28	672	0.0416667	1.8697e-09	14	14	Artifact (9)
IT_10	2	25467423	GT	G	DNMT3A	ENST00000264709	frameshift_variant	aac/|p.Asn551fs/c.1651delA	1352	34	1389	0.024478	0	0	0	0	1	0	0	0	1	NO	NO	NO	NO	O	NO	NO	NO	NO	NO	NO	NA	NA	23.23	NA	665	3	668	0.00449102	687	31	721	0.0429958	9.00788e-07	14	14	Artifact (9)
IT_17	2	25467423	GT	G	DNMT3A	ENST00000264709	frameshift_variant	aac/|p.Asn551fs/c.1651delA	779	29	809	0.0358467	0	0	0	0	1	0	0	0	1	NO	NO	NO	NO	O	NO	NO	NO	NO	NO	NO	NA	NA	24.33	NA	355	1	357	0.00280112	424	28	452	0.0619469	1.06367e-06	14	14	Artifact (9)
IT_18	2	25467423	GT	G	DNMT3A	ENST00000264709	frameshift_variant	aac/|p.Asn551fs/c.1651delA	984	24	1011	0.0237389	0	0	0	0	1	0	0	0	1	NO	NO	NO	NO	O	NO	NO	NO	NO	NO	NO	NA	NA	25.65	NA	528	1	530	0.00188679	456	23	481	0.047817	5.19724e-07	14	14	Artifact (9)
IT_19	2	25467423	GT	G	DNMT3A	ENST00000264709	frameshift_variant	aac/|p.Asn551fs/c.1651delA	1696	40	1744	0.0229358	0	0	0	0	1	0	0	0	1	NO	NO	NO	NO	O	NO	NO	NO	NO	NO	NO	NA	NA	23.67	NA	826	0	827	0	870	40	917	0.0436205	7.52771e-12	14	14	Artifact (9)
IT_17	2	25467435	G	GT	DNMT3A	ENST00000264709	frameshift_variant	ctc/ctAc|p.Met548fs/c.1640_1641insA	826	37	826	0.0447942	0	0	0	0	1	0	0	0	1	NO	NO	NO	NO	O	NO	NO	NO	NO	NO	NO	NA	NA	30.05	NA	355	35	355	0.0985915	471	2	471	0.00424628	7.98409e-11	6	6	Artifact (6)
IT_19	2	25467435	G	GT	DNMT3A	ENST00000264709	frameshift_variant	ctc/ctAc|p.Met548fs/c.1640_1641insA	1747	46	1747	0.0263309	0	0	0	0	1	0	0	0	1	NO	NO	NO	NO	O	NO	NO	NO	NO	NO	NO	NA	NA	29.83	NA	816	46	816	0.0563725	931	0	931	0	1.23198e-15	6	6	Artifact (6)
IT_22	2	25467435	G	GT	DNMT3A	ENST00000264709	frameshift_variant	ctc/ctAc|p.Met548fs/c.1640_1641insA	2723	77	2725	0.0282569	0	0	0	0	1	0	0	0	1	NO	NO	NO	NO	O	NO	NO	NO	NO	NO	NO	NA	NA	31.18	NA	1383	76	1384	0.0549133	1340	1	1341	0.000745712	4.77775e-21	6	6	Artifact (6)
IT_01	2	25467436	A	AC	DNMT3A	ENST00000264709	frameshift_variant	ctc/cGtc|p.Leu547fs/c.1639_1640insG	1626	25	1627	0.0153657	0	0	0	0	1	0	0	0	1	NO	NO	NO	NA	NA	NO	NO	NO	NO	NO	NO	NA	NA	29.15	NA	839	0	840	0	787	25	787	0.0317662	1.63095e-08	8	8	Artifact (8)
IT_20	2	25467436	A	AC	DNMT3A	ENST00000264709	frameshift_variant	ctc/cGtc|p.Leu547fs/c.1639_1640insG	727	33	727	0.045392	0	0	0	0	1	0	0	0	1	NO	NO	NO	NA	NA	NO	NO	NO	NO	NO	NO	NA	NA	29.97	NA	351	0	351	0	376	33	376	0.087766	8.65199e-10	8	8	Artifact (6)
IT_23	2	25467442	T	TC	DNMT3A	ENST00000264709	frameshift_variant	gag/gGag|p.Glu545fs/c.1633dupG	1060	156	1073	0.145387	1	0	0	0	1	1	0	0	3	NO	NO	NO	NO	O	NO	NO	NO	NO	NO	NO	NA	NA	26.73	NA	552	0	554	0	508	156	519	0.300578	8.58668e-46	24	28	Artifact (7)
IT_24	2	25467442	T	TC	DNMT3A	ENST00000264709	frameshift_variant	gag/gGag|p.Glu545fs/c.1633dupG	289	20	290	0.0689655	1	0	0	0	1	0	0	0	2	NO	NO	NO	NO	O	NO	NO	NO	NO	NO	NO	NA	NA	25.67	NA	146	0	146	0	143	20	144	0.138889	1.69519e-06	24	28	Artifact (8)
IT_01	2	25467442	T	TC	DNMT3A	ENST00000264709	frameshift_variant	gag/gGag|p.Glu545fs/c.1633dupG	1617	370	1626	0.227552	1	1	0	0	1	1	0	0	4	NO	NO	NO	NO	O	NO	NO	NO	NO	NO	NO	NA	NA	26.35	NA	838	0	838	0	779	370	788	0.469543	8.84061e-102	24	28	Artifact (6)
IT_02	2	25467442	T	TC	DNMT3A	ENST00000264709	frameshift_variant	gag/gGag|p.Glu545fs/c.1633dupG	347	66	352	0.1875	1	1	0	0	1	1	0	0	4	NO	NO	NO	NO	O	NO	NO	NO	NO	NO	NO	NA	NA	26.56	NA	163	0	163	0	184	66	189	0.349206	9.0741e-17	24	28	Artifact (6)
IT_03	2	25467442	T	TC	DNMT3A	ENST00000264709	frameshift_variant	gag/gGag|p.Glu545fs/c.1633dupG	393	121	394	0.307107	1	1	0	0	1	1	0	0	4	NO	NO	NO	NO	O	NO	NO	NO	NO	NO	NO	NA	NA	26.35	NA	191	0	192	0	202	121	202	0.59901	1.58445e-29	24	28	Artifact (6)
IT_04	2	25467442	T	TC	DNMT3A	ENST00000264709	frameshift_variant	gag/gGag|p.Glu545fs/c.1633dupG	416	125	418	0.299043	1	1	0	0	1	1	0	0	4	NO	NO	NO	NO	O	NO	NO	NO	NO	NO	NO	NA	NA	25.59	NA	209	0	210	0	207	125	208	0.600962	4.18695e-32	24	28	Artifact (6)
IT_07	2	25467442	T	TC	DNMT3A	ENST00000264709	frameshift_variant	gag/gGag|p.Glu545fs/c.1633dupG	600	85	607	0.140033	1	0	0	0	1	1	0	0	3	NO	NO	NO	NO	O	NO	NO	NO	NO	NO	NO	NA	NA	26.67	NA	315	0	315	0	285	85	292	0.291096	1.25974e-25	24	28	Artifact (7)
IT_08	2	25467442	T	TC	DNMT3A	ENST00000264709	frameshift_variant	gag/gGag|p.Glu545fs/c.1633dupG	508	68	514	0.132296	1	0	0	0	1	1	0	0	3	NO	NO	NO	NO	O	NO	NO	NO	NO	NO	NO	NA	NA	26.57	NA	278	1	279	0.00358423	230	67	235	0.285106	4.87023e-20	24	28	Artifact (7)
IT_09	2	25467442	T	TC	DNMT3A	ENST00000264709	frameshift_variant	gag/gGag|p.Glu545fs/c.1633dupG	1353	274	1356	0.202065	1	1	0	0	1	1	0	0	4	NO	NO	NO	NO	O	NO	NO	NO	NO	NO	NO	NA	NA	26.35	NA	676	1	677	0.0014771	677	273	679	0.402062	1.73608e-70	24	28	Artifact (6)
IT_10	2	25467442	T	TC	DNMT3A	ENST00000264709	frameshift_variant	gag/gGag|p.Glu545fs/c.1633dupG	1392	303	1404	0.215812	1	1	0	0	1	1	0	0	4	NO	NO	NO	NO	O	NO	NO	NO	NO	NO	NO	NA	NA	26.37	NA	660	0	660	0	732	303	744	0.407258	1.80918e-74	24	28	Artifact (6)
IT_11	2	25467442	T	TC	DNMT3A	ENST00000264709	frameshift_variant	cgt/cgtG|p.Glu545fs/c.1632_1633insG	1213	121	1218	0.0993432	0	0	0	0	1	1	0	0	2	NO	NO	NO	NO	O	NO	NO	NO	NO	NO	NO	NA	NA	28.85	NA	586	1	588	0.00170068	627	120	630	0.190476	3.83391e-31	24	28	Artifact (8)
IT_12	2	25467442	T	TC	DNMT3A	ENST00000264709	frameshift_variant	gag/gGag|p.Glu545fs/c.1633dupG	1813	198	1817	0.108971	1	0	0	0	1	1	0	0	3	NO	NO	NO	NO	O	NO	NO	NO	NO	NO	NO	NA	NA	29.18	NA	918	0	919	0	895	198	898	0.22049	8.49525e-57	24	28	Artifact (7)
IT_13	2	25467442	T	TC	DNMT3A	ENST00000264709	frameshift_variant	gag/gGag|p.Glu545fs/c.1633dupG	735	133	739	0.179973	1	0	0	0	1	1	0	0	3	NO	NO	NO	NO	O	NO	NO	NO	NO	NO	NO	NA	NA	27.5	NA	339	1	341	0.00293255	396	132	398	0.331658	1.53346e-30	24	28	Artifact (7)
IT_14	2	25467442	T	TC	DNMT3A	ENST00000264709	frameshift_variant	gag/gGag|p.Glu545fs/c.1633dupG	634	109	634	0.171924	1	1	0	0	1	1	0	0	4	NO	NO	NO	NO	O	NO	NO	NO	NO	NO	NO	NA	NA	28.27	NA	315	0	315	0	319	109	319	0.341693	1.16903e-29	24	28	Artifact (6)
IT_15	2	25467442	T	TC	DNMT3A	ENST00000264709	frameshift_variant	gag/gGag|p.Glu545fs/c.1633dupG	564	94	569	0.165202	1	0	0	0	1	1	0	0	3	NO	NO	NO	NO	O	NO	NO	NO	NO	NO	NO	NA	NA	27.03	NA	290	1	290	0.00344828	274	93	279	0.333333	6.37435e-25	24	28	Artifact (7)
IT_05	2	25467442	T	TC	DNMT3A	ENST00000264709	frameshift_variant	gag/gGag|p.Glu545fs/c.1633dupG	1088	223	1094	0.203839	1	0	0	0	1	1	0	0	3	NO	NO	NO	NO	O	NO	NO	NO	NO	NO	NO	NA	NA	25.27	NA	561	0	562	0	527	223	532	0.419173	4.48771e-62	24	28	Artifact (7)
IT_06	2	25467442	T	TC	DNMT3A	ENST00000264709	frameshift_variant	gag/gGag|p.Glu545fs/c.1633dupG	1577	279	1583	0.176248	1	1	0	0	1	1	0	0	4	NO	NO	NO	NO	O	NO	NO	NO	NO	NO	NO	NA	NA	25.17	NA	709	1	709	0.00141044	868	278	874	0.318078	3.28913e-63	24	28	Artifact (6)
IT_17	2	25467442	T	TC	DNMT3A	ENST00000264709	frameshift_variant	gag/gGag|p.Glu545fs/c.1633dupG	818	250	827	0.302297	1	1	0	0	1	1	0	0	4	NO	NO	NO	NO	O	NO	NO	NO	NO	NO	NO	NA	NA	27.81	NA	353	0	353	0	465	250	474	0.527426	5.88621e-52	24	28	Artifact (6)
IT_18	2	25467442	T	TC	DNMT3A	ENST00000264709	frameshift_variant	gag/gGag|p.Glu545fs/c.1633dupG	1027	273	1034	0.264023	1	1	0	0	1	1	0	0	4	NO	NO	NO	NO	O	NO	NO	NO	NO	NO	NO	NA	NA	28.97	NA	525	1	526	0.00190114	502	272	508	0.535433	6.27532e-70	24	28	Artifact (6)
IT_19	2	25467442	T	TC	DNMT3A	ENST00000264709	frameshift_variant	gag/gGag|p.Glu545fs/c.1633dupG	1728	740	1748	0.423341	1	1	0	0	1	1	0	0	4	NO	NO	NO	NO	O	NO	NO	NO	NO	NO	NO	NA	NA	27.54	NA	814	0	814	0	914	740	934	0.792291	2.54354e-161	24	28	Artifact (6)
IT_20	2	25467442	T	TC	DNMT3A	ENST00000264709	frameshift_variant	gag/gGag|p.Glu545fs/c.1633dupG	718	330	726	0.454545	1	1	1	0	1	1	0	0	5	NO	NO	NO	NO	O	NO	NO	NO	NO	NO	NO	NA	NA	28.91	NA	350	0	350	0	368	330	376	0.87766	1.79154e-74	24	28	Artifact (5)
IT_21	2	25467442	T	TC	DNMT3A	ENST00000264709	frameshift_variant	gag/gGag|p.Glu545fs/c.1633dupG	445	75	445	0.168539	1	1	0	0	1	1	0	0	4	NO	NO	NO	NO	O	NO	NO	NO	NO	NO	NO	NA	NA	28.36	NA	204	1	204	0.00490196	241	74	241	0.307054	6.86862e-17	24	28	Artifact (6)
IT_22	2	25467442	T	TC	DNMT3A	ENST00000264709	frameshift_variant	gag/gGag|p.Glu545fs/c.1633dupG	2712	441	2722	0.162013	1	0	0	0	1	1	0	0	3	NO	NO	NO	NO	O	NO	NO	NO	NO	NO	NO	NA	NA	28.66	NA	1374	0	1379	0	1338	441	1343	0.328369	3.62742e-122	24	28	Artifact (7)
IT_23	2	25467447	G	GC	DNMT3A	ENST00000264709	frameshift_variant	tgt/tgtG|p.Arg544fs/c.1623_1624insG	1073	22	1076	0.0204461	0	0	0	0	1	0	0	0	1	NO	NO	NO	NA	NA	NO	NO	NO	NO	NO	NO	NA	NA	24.34	NA	552	19	553	0.034358	521	3	523	0.00573614	0.000946799	15	37	Artifact (10)
IT_24	2	25467447	G	GC	DNMT3A	ENST00000264709	frameshift_variant	tgt/tgtG|p.Arg544fs/c.1623_1624insG	289	20	290	0.0689655	0	0	0	0	1	0	0	0	1	NO	NO	NO	NA	NA	NO	NO	NO	NO	NO	NO	NA	NA	23.24	NA	145	17	145	0.117241	144	3	145	0.0206897	0.00234541	15	37	Artifact (8)
IT_01	2	25467447	G	GC	DNMT3A	ENST00000264709	frameshift_variant	tgt/tgtG|p.Arg544fs/c.1623_1624insG	1625	20	1629	0.0122775	0	0	0	0	1	0	0	0	1	NO	NO	NO	NA	NA	NO	NO	NO	NO	NO	NO	NA	NA	22.66	NA	836	11	836	0.0131579	789	9	793	0.0113493	0.824306	15	37	Artifact (11)
IT_11	2	25467447	G	GC	DNMT3A	ENST00000264709	frameshift_variant	tgt/tgtG|p.Arg544fs/c.1623_1624insG	1219	30	1221	0.02457	0	0	0	0	1	0	0	0	1	NO	NO	NO	NA	NA	NO	NO	NO	NO	NO	NO	NA	NA	26.24	NA	587	28	588	0.047619	632	2	633	0.00315956	2.52834e-07	15	37	Artifact (10)
IT_12	2	25467447	G	GC	DNMT3A	ENST00000264709	frameshift_variant	tgt/tgtG|p.Arg544fs/c.1623_1624insG	1816	24	1820	0.0131868	0	0	0	0	1	0	0	0	1	NO	NO	NO	NA	NA	NO	NO	NO	NO	NO	NO	NA	NA	26.38	NA	917	21	919	0.0228509	899	3	901	0.00332963	0.000270071	15	37	Artifact (12)
IT_06	2	25467447	G	GC	DNMT3A	ENST00000264709	frameshift_variant	tgt/tgtG|p.Arg544fs/c.1623_1624insG	1583	24	1589	0.0151038	0	0	0	0	1	0	0	0	1	NO	NO	NO	NA	NA	NO	NO	NO	NO	NO	NO	NA	NA	24.83	NA	708	18	709	0.0253879	875	6	880	0.00681818	0.0034663	15	37	Artifact (11)
IT_23	2	25467447	GC	G	DNMT3A	ENST00000264709	frameshift_variant	ggg/|p.Gly543fs/c.1624delG	1054	21	1077	0.0194986	0	0	0	0	1	0	0	0	1	NO	NO	NO	NA	NA	NO	NO	NO	NO	NO	NO	NA	NA	20.49	NA	551	1	553	0.00180832	503	20	524	0.0381679	5.92265e-06	22	37	Artifact (12)
IT_01	2	25467447	GC	G	DNMT3A	ENST00000264709	frameshift_variant	ggg/|p.Gly543fs/c.1624delG	1588	37	1627	0.0227412	0	0	0	0	1	0	0	0	1	NO	NO	NO	NA	NA	NO	NO	NO	NO	NO	NO	NA	NA	18.74	NA	828	6	836	0.00717703	760	31	791	0.0391909	1.45876e-05	22	37	Artifact (10)
IT_04	2	25467447	GC	G	DNMT3A	ENST00000264709	frameshift_variant	ggg/|p.Gly543fs/c.1624delG	398	20	419	0.0477327	0	0	0	0	1	0	0	0	1	NO	NO	NO	NA	NA	NO	NO	NO	NO	NO	NO	NA	NA	19.12	NA	202	7	210	0.0333333	196	13	209	0.062201	0.251442	22	37	Artifact (9)
IT_08	2	25467447	GC	G	DNMT3A	ENST00000264709	frameshift_variant	ggg/|p.Gly543fs/c.1624delG	497	20	518	0.03861	0	0	0	0	1	0	0	0	1	NO	NO	NO	NA	NA	NO	NO	NO	NO	NO	NO	NA	NA	19.7	NA	278	1	279	0.00358423	219	19	239	0.0794979	3.0882e-06	22	37	Artifact (10)
IT_09	2	25467447	GC	G	DNMT3A	ENST00000264709	frameshift_variant	ggg/|p.Gly543fs/c.1624delG	1314	49	1364	0.0359238	0	0	0	0	1	0	0	0	1	NO	NO	NO	NA	NA	NO	NO	NO	NO	NO	NO	NA	NA	18.15	NA	669	9	678	0.0132743	645	40	686	0.058309	6.55287e-06	22	37	Artifact (10)
IT_10	2	25467447	GC	G	DNMT3A	ENST00000264709	frameshift_variant	ggg/|p.Gly543fs/c.1624delG	1317	91	1414	0.0643564	0	0	0	0	1	1	0	0	2	NO	NO	NO	NA	NA	NO	NO	NO	NO	NO	NO	NA	NA	17.39	NA	640	19	660	0.0287879	677	72	754	0.0954907	1.83593e-07	22	37	Artifact (7)
IT_11	2	25467447	GC	G	DNMT3A	ENST00000264709	frameshift_variant	ggg/|p.Gly543fs/c.1624delG	1188	30	1220	0.0245902	0	0	0	0	1	0	0	0	1	NO	NO	NO	NA	NA	NO	NO	NO	NO	NO	NO	NA	NA	22.73	NA	582	5	588	0.0085034	606	25	632	0.039557	0.000351614	22	37	Artifact (10)
IT_12	2	25467447	GC	G	DNMT3A	ENST00000264709	frameshift_variant	ggg/|p.Gly543fs/c.1624delG	1755	59	1818	0.0324532	0	0	0	0	1	0	0	0	1	NO	NO	NO	NA	NA	NO	NO	NO	NO	NO	NO	NA	NA	23.42	NA	915	2	919	0.00217628	840	57	899	0.0634038	7.80503e-16	22	37	Artifact (10)
IT_13	2	25467447	GC	G	DNMT3A	ENST00000264709	frameshift_variant	ggg/|p.Gly543fs/c.1624delG	722	21	743	0.0282638	0	0	0	0	1	0	0	0	1	NO	NO	NO	NA	NA	NO	NO	NO	NO	NO	NO	NA	NA	21.78	NA	341	0	341	0	381	21	402	0.0522388	3.4826e-06	22	37	Artifact (10)
IT_14	2	25467447	GC	G	DNMT3A	ENST00000264709	frameshift_variant	ggg/|p.Gly543fs/c.1624delG	611	21	634	0.033123	0	0	0	0	1	0	0	0	1	NO	NO	NO	NA	NA	NO	NO	NO	NO	NO	NO	NA	NA	22.27	NA	311	3	314	0.00955414	300	18	320	0.05625	0.00125576	22	37	Artifact (9)
IT_06	2	25467447	GC	G	DNMT3A	ENST00000264709	frameshift_variant	ggg/|p.Gly543fs/c.1624delG	1559	25	1588	0.0157431	0	0	0	0	1	0	0	0	1	NO	NO	NO	NA	NA	NO	NO	NO	NO	NO	NO	NA	NA	19.08	NA	704	3	709	0.00423131	855	22	879	0.0250284	0.000800459	22	37	Artifact (12)
IT_17	2	25467447	GC	G	DNMT3A	ENST00000264709	frameshift_variant	ggg/|p.Gly543fs/c.1624delG	786	44	832	0.0528846	0	0	0	0	1	1	0	0	2	NO	NO	NO	NA	NA	NO	NO	NO	NO	NO	NO	NA	NA	20.83	NA	346	7	353	0.01983	440	37	479	0.0772443	0.000226014	22	37	Artifact (8)
IT_18	2	25467447	GC	G	DNMT3A	ENST00000264709	frameshift_variant	ggg/|p.Gly543fs/c.1624delG	983	59	1044	0.0565134	0	0	0	0	1	1	0	0	2	NO	NO	NO	NA	NA	NO	NO	NO	NO	NO	NO	NA	NA	21.61	NA	511	11	524	0.0209924	472	48	520	0.0923077	3.57843e-07	22	37	Artifact (7)
[truncated: 18,922 more rows]

## Sheet: TN Mutations Filter 1
Sample	Chr	Pos	Ref	Alt	Gene	ENST	Type	Mutation	Nr_Ref	Nr_Alt	DP	VAF	GATK	Platypus	VarScan	LoFreq	FreeBayes	SNVer	SAMtools	VarDict	Called	ESP6500	G1000	Cosmic	Cosmic_location	Cosmic_occurence	dbSNP_SNPs	dbSNP_SNVs	PM_flag	ExAC	ClinVar_clinical	ClinVar_noimpact	Provean_Prediction	Provean_Score	BQ_Ref	BQ_Alt	Nr_Ref_fwd	Nr_Alt_fwd	DP_fwd	VAF_fwd	Nr_Ref_rev	Nr_Alt_rev	DP_rev	VAF_rev
[truncated: 496 more rows]
