# Supplementary material for: appreci8: a pipeline for precise variant calling integrating 8 tools
Source: Oxford University Press journal article supplement (doi:10.1093/bioinformatics/bty518), 2018-06-25
Supplement: bioinformatics_34_24_4205_s10.xlsx [file bioinformatics_34_24_4205_s10.xlsx]

## Sheet: Overview
		Best combination of	GATK	Platypus	VarScan	LoFreq	FreeBayes	SNVer	SAMtools	VarDict	Training set 1			Training set 2
											Sens	PPV	F1	Sens	PPV	F1
		1 tool	x								0.920962	0.845426	0.881579	0.81775	0.710744	0.760501
		2 tools		x						x	0.914089	0.988848	0.95	0.876387	0.958406	0.915563
		3 tools		x			x			x	0.910653	0.988806	0.948122	0.876387	0.960069	0.916321
		4 tools	x	x			x			x	0.896907	1	0.945652	0.7813	0.980119	0.869489
		5 tools	x	x		x	x			x	0.831615	1	0.908068	0.698891	0.98	0.815911
		6 tools	x	x		x	x		x	x	0.814433	1	0.897727	0.568938	0.991713	0.723061
		7 tools	x	x	x	x	x		x	x	0.804124	1	0.891429	0.381933	0.987705	0.550857
		8 tools	x	x	x	x	x	x	x	x	0.762887	1	0.865497	0.166403	0.981308	0.284553
		Best combination training set 1								x	0.972509	0.962585	0.967521	0.942948	0.145016	0.251373
		Best combination training set 2		x			x			x	0.910653	0.988806	0.948122	0.876387	0.960069	0.916321
		appreci8									0.98	0.99	0.984975	0.98	0.94	0.959583
		Best combination of	Test set 1			Test set 2			Test set 3			Test set 4			Test set 5
			Sens	PPV	F1	Sens	PPV	F1	Sens	PPV	F1	Sens	PPV	F1	Sens	PPV	F1
		1 tool	0.920296	0.817518	0.865868	0.899194	0.728758	0.805054	0.948718	0.30859	0.465702	0.857895	0.730942	0.789346	0.813472	0.882022	0.846361
		2 tools	0.905505	0.991899	0.946735	0.923387	0.991342	0.956159	0.969231	0.499339	0.659111	0.847368	0.947059	0.894444	0.834197	0.879781	0.856383
		3 tools	0.904684	0.991892	0.946283	0.919355	1	0.957983	0.969231	0.64837	0.776978	0.826316	0.951515	0.884507	0.813472	0.882022	0.846361
		4 tools	0.891537	0.99359	0.939801	0.879032	1	0.935622	0.938462	0.793926	0.860165	0.8	0.974359	0.878613	0.787565	0.932515	0.853933
		5 tools	0.882498	0.993525	0.934726	0.870968	1	0.931034	0.892308	0.969359	0.929239	0.621053	0.991597	0.763754	0.611399	0.929134	0.7375
		6 tools	0.798685	0.995902	0.886457	0.78629	1	0.880361	0.882051	0.99422	0.934783	0.594737	1	0.745875	0.585492	0.982609	0.733766
		7 tools	0.771569	0.996815	0.869847	0.754032	1	0.85977	0.861538	0.997033	0.924347	0.563158	1	0.720539	0.554404	0.981651	0.708609
		8 tools	0.731306	0.996641	0.843602	0.721774	1	0.838407	0.853846	0.997006	0.91989	0.315789	1	0.48	0.310881	0.983607	0.472441
		Best combination training set 1	0.966311	0.776238	0.860908	0.987903	0.299511	0.459662	0.994872	0.250161	0.399794	0.910526	0.0910526	0.16555	0.896373	0.162594	0.275259
		Best combination training set 2	0.904684	0.991892	0.946283	0.919355	1	0.957983	0.969231	0.64837	0.776978	0.826316	0.951515	0.884507	0.84456	0.372146	0.51664
		appreci8	0.98	0.99	0.984975	1	0.99	0.994975	0.98	0.76	0.856092	0.93	0.65	0.76519	1	1	1

## Sheet: Training 1
Caller 1	Caller 2	Caller 3	Caller 4	Caller 5	Caller 6	Caller 7	Caller 8	Sensitivity	PPV	F1
GATK	NA	NA	NA	NA	NA	NA	NA	0.920962	0.845426	0.881579	best single tool of both training sets
Platypus	NA	NA	NA	NA	NA	NA	NA	0.934708	0.80236	0.863492
VarScan	NA	NA	NA	NA	NA	NA	NA	0.886598	0.973585	0.928058
LoFreq	NA	NA	NA	NA	NA	NA	NA	0.910653	0.345502	0.500945
FreeBayes	NA	NA	NA	NA	NA	NA	NA	0.996564	0.0348139	0.0672776
SNVer	NA	NA	NA	NA	NA	NA	NA	0.931271	0.915541	0.923339
SAMtools	NA	NA	NA	NA	NA	NA	NA	0.852234	0.867133	0.859619
VarDict	NA	NA	NA	NA	NA	NA	NA	0.972509	0.962585	0.967521	best solution training set 1
GATK	Platypus	NA	NA	NA	NA	NA	NA	0.920962	0.996283	0.957143
GATK	VarScan	NA	NA	NA	NA	NA	NA	0.879725	0.988417	0.930909
GATK	LoFreq	NA	NA	NA	NA	NA	NA	0.845361	1	0.916201
GATK	FreeBayes	NA	NA	NA	NA	NA	NA	0.917526	0.844937	0.879736
GATK	SNVer	NA	NA	NA	NA	NA	NA	0.869416	0.976834	0.92
GATK	SAMtools	NA	NA	NA	NA	NA	NA	0.848797	1	0.918216
GATK	VarDict	NA	NA	NA	NA	NA	NA	0.900344	1	0.947559
Platypus	VarScan	NA	NA	NA	NA	NA	NA	0.886598	0.996139	0.938182
Platypus	LoFreq	NA	NA	NA	NA	NA	NA	0.848797	0.95	0.896552
Platypus	FreeBayes	NA	NA	NA	NA	NA	NA	0.931271	0.801775	0.861685
Platypus	SNVer	NA	NA	NA	NA	NA	NA	0.879725	0.984615	0.92922
Platypus	SAMtools	NA	NA	NA	NA	NA	NA	0.852234	0.870175	0.861111
Platypus	VarDict	NA	NA	NA	NA	NA	NA	0.914089	0.988848	0.95	best combination of both training sets
VarScan	LoFreq	NA	NA	NA	NA	NA	NA	0.821306	0.995833	0.900188
VarScan	FreeBayes	NA	NA	NA	NA	NA	NA	0.883162	0.973485	0.926126
VarScan	SNVer	NA	NA	NA	NA	NA	NA	0.841924	0.995935	0.912477
VarScan	SAMtools	NA	NA	NA	NA	NA	NA	0.838488	1	0.91215
VarScan	VarDict	NA	NA	NA	NA	NA	NA	0.876289	1	0.934066
LoFreq	FreeBayes	NA	NA	NA	NA	NA	NA	0.910653	0.345953	0.501419
LoFreq	SNVer	NA	NA	NA	NA	NA	NA	0.85567	0.980315	0.913761
LoFreq	SAMtools	NA	NA	NA	NA	NA	NA	0.828179	0.995868	0.904315
LoFreq	VarDict	NA	NA	NA	NA	NA	NA	0.890034	0.966418	0.926655
FreeBayes	SNVer	NA	NA	NA	NA	NA	NA	0.927835	0.915254	0.921502
FreeBayes	SAMtools	NA	NA	NA	NA	NA	NA	0.848797	0.869718	0.85913
FreeBayes	VarDict	NA	NA	NA	NA	NA	NA	0.969072	0.965753	0.96741
SNVer	SAMtools	NA	NA	NA	NA	NA	NA	0.804124	0.995745	0.889734
SNVer	VarDict	NA	NA	NA	NA	NA	NA	0.914089	0.988848	0.95
SAMtools	VarDict	NA	NA	NA	NA	NA	NA	0.841924	1	0.914179
GATK	Platypus	VarScan	NA	NA	NA	NA	NA	0.879725	0.996109	0.934307
GATK	Platypus	LoFreq	NA	NA	NA	NA	NA	0.845361	1	0.916201
GATK	Platypus	FreeBayes	NA	NA	NA	NA	NA	0.917526	0.996269	0.955277
GATK	Platypus	SNVer	NA	NA	NA	NA	NA	0.869416	0.996063	0.92844
GATK	Platypus	SAMtools	NA	NA	NA	NA	NA	0.848797	1	0.918216
GATK	Platypus	VarDict	NA	NA	NA	NA	NA	0.900344	1	0.947559
GATK	VarScan	LoFreq	NA	NA	NA	NA	NA	0.817869	1	0.899811
GATK	VarScan	FreeBayes	NA	NA	NA	NA	NA	0.876289	0.988372	0.928962
GATK	VarScan	SNVer	NA	NA	NA	NA	NA	0.835052	0.995902	0.908411
GATK	VarScan	SAMtools	NA	NA	NA	NA	NA	0.835052	1	0.910112
GATK	VarScan	VarDict	NA	NA	NA	NA	NA	0.869416	1	0.930147
GATK	LoFreq	FreeBayes	NA	NA	NA	NA	NA	0.845361	1	0.916201
GATK	LoFreq	SNVer	NA	NA	NA	NA	NA	0.800687	1	0.889313
GATK	LoFreq	SAMtools	NA	NA	NA	NA	NA	0.824742	1	0.903955
GATK	LoFreq	VarDict	NA	NA	NA	NA	NA	0.831615	1	0.908068
GATK	FreeBayes	SNVer	NA	NA	NA	NA	NA	0.865979	0.976744	0.918033
GATK	FreeBayes	SAMtools	NA	NA	NA	NA	NA	0.845361	1	0.916201
GATK	FreeBayes	VarDict	NA	NA	NA	NA	NA	0.896907	1	0.945652
GATK	SNVer	SAMtools	NA	NA	NA	NA	NA	0.800687	1	0.889313
GATK	SNVer	VarDict	NA	NA	NA	NA	NA	0.85567	1	0.922222
GATK	SAMtools	VarDict	NA	NA	NA	NA	NA	0.838488	1	0.91215
Platypus	VarScan	LoFreq	NA	NA	NA	NA	NA	0.821306	1	0.901887
Platypus	VarScan	FreeBayes	NA	NA	NA	NA	NA	0.883162	0.996124	0.936248
Platypus	VarScan	SNVer	NA	NA	NA	NA	NA	0.841924	0.995935	0.912477
Platypus	VarScan	SAMtools	NA	NA	NA	NA	NA	0.838488	1	0.91215
Platypus	VarScan	VarDict	NA	NA	NA	NA	NA	0.876289	1	0.934066
Platypus	LoFreq	FreeBayes	NA	NA	NA	NA	NA	0.848797	0.95	0.896552
Platypus	LoFreq	SNVer	NA	NA	NA	NA	NA	0.804124	0.987342	0.886364
Platypus	LoFreq	SAMtools	NA	NA	NA	NA	NA	0.828179	0.995868	0.904315
Platypus	LoFreq	VarDict	NA	NA	NA	NA	NA	0.835052	0.991837	0.906716
Platypus	FreeBayes	SNVer	NA	NA	NA	NA	NA	0.876289	0.984556	0.927273
Platypus	FreeBayes	SAMtools	NA	NA	NA	NA	NA	0.848797	0.869718	0.85913
Platypus	FreeBayes	VarDict	NA	NA	NA	NA	NA	0.910653	0.988806	0.948122	best 3tool combination of both training sets	best solution training set 2
Platypus	SNVer	SAMtools	NA	NA	NA	NA	NA	0.804124	0.995745	0.889734
Platypus	SNVer	VarDict	NA	NA	NA	NA	NA	0.865979	0.992126	0.924771
Platypus	SAMtools	VarDict	NA	NA	NA	NA	NA	0.841924	1	0.914179
VarScan	LoFreq	FreeBayes	NA	NA	NA	NA	NA	0.821306	0.995833	0.900188
VarScan	LoFreq	SNVer	NA	NA	NA	NA	NA	0.776632	1	0.874275
VarScan	LoFreq	SAMtools	NA	NA	NA	NA	NA	0.817869	1	0.899811
VarScan	LoFreq	VarDict	NA	NA	NA	NA	NA	0.810997	1	0.895636
VarScan	FreeBayes	SNVer	NA	NA	NA	NA	NA	0.838488	0.995918	0.910448
VarScan	FreeBayes	SAMtools	NA	NA	NA	NA	NA	0.835052	1	0.910112
VarScan	FreeBayes	VarDict	NA	NA	NA	NA	NA	0.872852	1	0.93211
VarScan	SNVer	SAMtools	NA	NA	NA	NA	NA	0.793814	1	0.885057
VarScan	SNVer	VarDict	NA	NA	NA	NA	NA	0.835052	1	0.910112
VarScan	SAMtools	VarDict	NA	NA	NA	NA	NA	0.828179	1	0.906015
LoFreq	FreeBayes	SNVer	NA	NA	NA	NA	NA	0.85567	0.980315	0.913761
LoFreq	FreeBayes	SAMtools	NA	NA	NA	NA	NA	0.828179	0.995868	0.904315
LoFreq	FreeBayes	VarDict	NA	NA	NA	NA	NA	0.890034	0.966418	0.926655
LoFreq	SNVer	SAMtools	NA	NA	NA	NA	NA	0.783505	0.995633	0.876923
LoFreq	SNVer	VarDict	NA	NA	NA	NA	NA	0.841924	0.987903	0.909091
LoFreq	SAMtools	VarDict	NA	NA	NA	NA	NA	0.817869	1	0.899811
FreeBayes	SNVer	SAMtools	NA	NA	NA	NA	NA	0.800687	0.995726	0.887619
FreeBayes	SNVer	VarDict	NA	NA	NA	NA	NA	0.910653	0.988806	0.948122
FreeBayes	SAMtools	VarDict	NA	NA	NA	NA	NA	0.838488	1	0.91215
SNVer	SAMtools	VarDict	NA	NA	NA	NA	NA	0.797251	1	0.887189
GATK	Platypus	VarScan	LoFreq	NA	NA	NA	NA	0.817869	1	0.899811
GATK	Platypus	VarScan	FreeBayes	NA	NA	NA	NA	0.876289	0.996094	0.932358
GATK	Platypus	VarScan	SNVer	NA	NA	NA	NA	0.835052	0.995902	0.908411
GATK	Platypus	VarScan	SAMtools	NA	NA	NA	NA	0.835052	1	0.910112
GATK	Platypus	VarScan	VarDict	NA	NA	NA	NA	0.869416	1	0.930147
GATK	Platypus	LoFreq	FreeBayes	NA	NA	NA	NA	0.845361	1	0.916201
GATK	Platypus	LoFreq	SNVer	NA	NA	NA	NA	0.800687	1	0.889313
GATK	Platypus	LoFreq	SAMtools	NA	NA	NA	NA	0.824742	1	0.903955
GATK	Platypus	LoFreq	VarDict	NA	NA	NA	NA	0.831615	1	0.908068
GATK	Platypus	FreeBayes	SNVer	NA	NA	NA	NA	0.865979	0.996047	0.926471
GATK	Platypus	FreeBayes	SAMtools	NA	NA	NA	NA	0.845361	1	0.916201
GATK	Platypus	FreeBayes	VarDict	NA	NA	NA	NA	0.896907	1	0.945652	best 4tool combination of both training sets
GATK	Platypus	SNVer	SAMtools	NA	NA	NA	NA	0.800687	1	0.889313
GATK	Platypus	SNVer	VarDict	NA	NA	NA	NA	0.85567	1	0.922222
GATK	Platypus	SAMtools	VarDict	NA	NA	NA	NA	0.838488	1	0.91215
GATK	VarScan	LoFreq	FreeBayes	NA	NA	NA	NA	0.817869	1	0.899811
GATK	VarScan	LoFreq	SNVer	NA	NA	NA	NA	0.773196	1	0.872093
GATK	VarScan	LoFreq	SAMtools	NA	NA	NA	NA	0.814433	1	0.897727
GATK	VarScan	LoFreq	VarDict	NA	NA	NA	NA	0.80756	1	0.893536
GATK	VarScan	FreeBayes	SNVer	NA	NA	NA	NA	0.831615	0.995885	0.906367
GATK	VarScan	FreeBayes	SAMtools	NA	NA	NA	NA	0.831615	1	0.908068
GATK	VarScan	FreeBayes	VarDict	NA	NA	NA	NA	0.865979	1	0.928177
GATK	VarScan	SNVer	SAMtools	NA	NA	NA	NA	0.790378	1	0.882917
GATK	VarScan	SNVer	VarDict	NA	NA	NA	NA	0.828179	1	0.906015
GATK	VarScan	SAMtools	VarDict	NA	NA	NA	NA	0.824742	1	0.903955
GATK	LoFreq	FreeBayes	SNVer	NA	NA	NA	NA	0.800687	1	0.889313
GATK	LoFreq	FreeBayes	SAMtools	NA	NA	NA	NA	0.824742	1	0.903955
GATK	LoFreq	FreeBayes	VarDict	NA	NA	NA	NA	0.831615	1	0.908068
GATK	LoFreq	SNVer	SAMtools	NA	NA	NA	NA	0.780069	1	0.876448
GATK	LoFreq	SNVer	VarDict	NA	NA	NA	NA	0.790378	1	0.882917
GATK	LoFreq	SAMtools	VarDict	NA	NA	NA	NA	0.814433	1	0.897727
GATK	FreeBayes	SNVer	SAMtools	NA	NA	NA	NA	0.797251	1	0.887189
GATK	FreeBayes	SNVer	VarDict	NA	NA	NA	NA	0.852234	1	0.920223
GATK	FreeBayes	SAMtools	VarDict	NA	NA	NA	NA	0.835052	1	0.910112
GATK	SNVer	SAMtools	VarDict	NA	NA	NA	NA	0.793814	1	0.885057
Platypus	VarScan	LoFreq	FreeBayes	NA	NA	NA	NA	0.821306	1	0.901887
Platypus	VarScan	LoFreq	SNVer	NA	NA	NA	NA	0.776632	1	0.874275
Platypus	VarScan	LoFreq	SAMtools	NA	NA	NA	NA	0.817869	1	0.899811
Platypus	VarScan	LoFreq	VarDict	NA	NA	NA	NA	0.810997	1	0.895636
Platypus	VarScan	FreeBayes	SNVer	NA	NA	NA	NA	0.838488	0.995918	0.910448
Platypus	VarScan	FreeBayes	SAMtools	NA	NA	NA	NA	0.835052	1	0.910112
Platypus	VarScan	FreeBayes	VarDict	NA	NA	NA	NA	0.872852	1	0.93211
Platypus	VarScan	SNVer	SAMtools	NA	NA	NA	NA	0.793814	1	0.885057
Platypus	VarScan	SNVer	VarDict	NA	NA	NA	NA	0.835052	1	0.910112
Platypus	VarScan	SAMtools	VarDict	NA	NA	NA	NA	0.828179	1	0.906015
Platypus	LoFreq	FreeBayes	SNVer	NA	NA	NA	NA	0.804124	0.987342	0.886364
Platypus	LoFreq	FreeBayes	SAMtools	NA	NA	NA	NA	0.828179	0.995868	0.904315
Platypus	LoFreq	FreeBayes	VarDict	NA	NA	NA	NA	0.835052	0.991837	0.906716
Platypus	LoFreq	SNVer	SAMtools	NA	NA	NA	NA	0.783505	0.995633	0.876923
Platypus	LoFreq	SNVer	VarDict	NA	NA	NA	NA	0.793814	0.991416	0.881679
Platypus	LoFreq	SAMtools	VarDict	NA	NA	NA	NA	0.817869	1	0.899811
Platypus	FreeBayes	SNVer	SAMtools	NA	NA	NA	NA	0.800687	0.995726	0.887619
Platypus	FreeBayes	SNVer	VarDict	NA	NA	NA	NA	0.862543	0.992095	0.922794
Platypus	FreeBayes	SAMtools	VarDict	NA	NA	NA	NA	0.838488	1	0.91215
Platypus	SNVer	SAMtools	VarDict	NA	NA	NA	NA	0.797251	1	0.887189
VarScan	LoFreq	FreeBayes	SNVer	NA	NA	NA	NA	0.776632	1	0.874275
VarScan	LoFreq	FreeBayes	SAMtools	NA	NA	NA	NA	0.817869	1	0.899811
VarScan	LoFreq	FreeBayes	VarDict	NA	NA	NA	NA	0.810997	1	0.895636
VarScan	LoFreq	SNVer	SAMtools	NA	NA	NA	NA	0.773196	1	0.872093
VarScan	LoFreq	SNVer	VarDict	NA	NA	NA	NA	0.769759	1	0.869903
VarScan	LoFreq	SAMtools	VarDict	NA	NA	NA	NA	0.80756	1	0.893536
VarScan	FreeBayes	SNVer	SAMtools	NA	NA	NA	NA	0.790378	1	0.882917
VarScan	FreeBayes	SNVer	VarDict	NA	NA	NA	NA	0.831615	1	0.908068
VarScan	FreeBayes	SAMtools	VarDict	NA	NA	NA	NA	0.824742	1	0.903955
VarScan	SNVer	SAMtools	VarDict	NA	NA	NA	NA	0.786942	1	0.880769
LoFreq	FreeBayes	SNVer	SAMtools	NA	NA	NA	NA	0.783505	0.995633	0.876923
LoFreq	FreeBayes	SNVer	VarDict	NA	NA	NA	NA	0.841924	0.987903	0.909091
LoFreq	FreeBayes	SAMtools	VarDict	NA	NA	NA	NA	0.817869	1	0.899811
LoFreq	SNVer	SAMtools	VarDict	NA	NA	NA	NA	0.776632	1	0.874275
FreeBayes	SNVer	SAMtools	VarDict	NA	NA	NA	NA	0.793814	1	0.885057
GATK	Platypus	VarScan	LoFreq	FreeBayes	NA	NA	NA	0.817869	1	0.899811
GATK	Platypus	VarScan	LoFreq	SNVer	NA	NA	NA	0.773196	1	0.872093
GATK	Platypus	VarScan	LoFreq	SAMtools	NA	NA	NA	0.814433	1	0.897727
GATK	Platypus	VarScan	LoFreq	VarDict	NA	NA	NA	0.80756	1	0.893536
GATK	Platypus	VarScan	FreeBayes	SNVer	NA	NA	NA	0.831615	0.995885	0.906367
GATK	Platypus	VarScan	FreeBayes	SAMtools	NA	NA	NA	0.831615	1	0.908068
GATK	Platypus	VarScan	FreeBayes	VarDict	NA	NA	NA	0.865979	1	0.928177
GATK	Platypus	VarScan	SNVer	SAMtools	NA	NA	NA	0.790378	1	0.882917
GATK	Platypus	VarScan	SNVer	VarDict	NA	NA	NA	0.828179	1	0.906015
GATK	Platypus	VarScan	SAMtools	VarDict	NA	NA	NA	0.824742	1	0.903955
GATK	Platypus	LoFreq	FreeBayes	SNVer	NA	NA	NA	0.800687	1	0.889313
GATK	Platypus	LoFreq	FreeBayes	SAMtools	NA	NA	NA	0.824742	1	0.903955
GATK	Platypus	LoFreq	FreeBayes	VarDict	NA	NA	NA	0.831615	1	0.908068	best 5tool combination of both training sets
GATK	Platypus	LoFreq	SNVer	SAMtools	NA	NA	NA	0.780069	1	0.876448
GATK	Platypus	LoFreq	SNVer	VarDict	NA	NA	NA	0.790378	1	0.882917
GATK	Platypus	LoFreq	SAMtools	VarDict	NA	NA	NA	0.814433	1	0.897727
GATK	Platypus	FreeBayes	SNVer	SAMtools	NA	NA	NA	0.797251	1	0.887189
GATK	Platypus	FreeBayes	SNVer	VarDict	NA	NA	NA	0.852234	1	0.920223
GATK	Platypus	FreeBayes	SAMtools	VarDict	NA	NA	NA	0.835052	1	0.910112
GATK	Platypus	SNVer	SAMtools	VarDict	NA	NA	NA	0.793814	1	0.885057
GATK	VarScan	LoFreq	FreeBayes	SNVer	NA	NA	NA	0.773196	1	0.872093
GATK	VarScan	LoFreq	FreeBayes	SAMtools	NA	NA	NA	0.814433	1	0.897727
GATK	VarScan	LoFreq	FreeBayes	VarDict	NA	NA	NA	0.80756	1	0.893536
GATK	VarScan	LoFreq	SNVer	SAMtools	NA	NA	NA	0.769759	1	0.869903
GATK	VarScan	LoFreq	SNVer	VarDict	NA	NA	NA	0.766323	1	0.867704
GATK	VarScan	LoFreq	SAMtools	VarDict	NA	NA	NA	0.804124	1	0.891429
GATK	VarScan	FreeBayes	SNVer	SAMtools	NA	NA	NA	0.786942	1	0.880769
GATK	VarScan	FreeBayes	SNVer	VarDict	NA	NA	NA	0.824742	1	0.903955
GATK	VarScan	FreeBayes	SAMtools	VarDict	NA	NA	NA	0.821306	1	0.901887
GATK	VarScan	SNVer	SAMtools	VarDict	NA	NA	NA	0.783505	1	0.878613
GATK	LoFreq	FreeBayes	SNVer	SAMtools	NA	NA	NA	0.780069	1	0.876448
GATK	LoFreq	FreeBayes	SNVer	VarDict	NA	NA	NA	0.790378	1	0.882917
GATK	LoFreq	FreeBayes	SAMtools	VarDict	NA	NA	NA	0.814433	1	0.897727
GATK	LoFreq	SNVer	SAMtools	VarDict	NA	NA	NA	0.773196	1	0.872093
GATK	FreeBayes	SNVer	SAMtools	VarDict	NA	NA	NA	0.790378	1	0.882917
Platypus	VarScan	LoFreq	FreeBayes	SNVer	NA	NA	NA	0.776632	1	0.874275
Platypus	VarScan	LoFreq	FreeBayes	SAMtools	NA	NA	NA	0.817869	1	0.899811
Platypus	VarScan	LoFreq	FreeBayes	VarDict	NA	NA	NA	0.810997	1	0.895636
Platypus	VarScan	LoFreq	SNVer	SAMtools	NA	NA	NA	0.773196	1	0.872093
Platypus	VarScan	LoFreq	SNVer	VarDict	NA	NA	NA	0.769759	1	0.869903
Platypus	VarScan	LoFreq	SAMtools	VarDict	NA	NA	NA	0.80756	1	0.893536
Platypus	VarScan	FreeBayes	SNVer	SAMtools	NA	NA	NA	0.790378	1	0.882917
Platypus	VarScan	FreeBayes	SNVer	VarDict	NA	NA	NA	0.831615	1	0.908068
Platypus	VarScan	FreeBayes	SAMtools	VarDict	NA	NA	NA	0.824742	1	0.903955
Platypus	VarScan	SNVer	SAMtools	VarDict	NA	NA	NA	0.786942	1	0.880769
Platypus	LoFreq	FreeBayes	SNVer	SAMtools	NA	NA	NA	0.783505	0.995633	0.876923
Platypus	LoFreq	FreeBayes	SNVer	VarDict	NA	NA	NA	0.793814	0.991416	0.881679
Platypus	LoFreq	FreeBayes	SAMtools	VarDict	NA	NA	NA	0.817869	1	0.899811
Platypus	LoFreq	SNVer	SAMtools	VarDict	NA	NA	NA	0.776632	1	0.874275
Platypus	FreeBayes	SNVer	SAMtools	VarDict	NA	NA	NA	0.793814	1	0.885057
VarScan	LoFreq	FreeBayes	SNVer	SAMtools	NA	NA	NA	0.773196	1	0.872093
VarScan	LoFreq	FreeBayes	SNVer	VarDict	NA	NA	NA	0.769759	1	0.869903
VarScan	LoFreq	FreeBayes	SAMtools	VarDict	NA	NA	NA	0.80756	1	0.893536
VarScan	LoFreq	SNVer	SAMtools	VarDict	NA	NA	NA	0.766323	1	0.867704
VarScan	FreeBayes	SNVer	SAMtools	VarDict	NA	NA	NA	0.783505	1	0.878613
LoFreq	FreeBayes	SNVer	SAMtools	VarDict	NA	NA	NA	0.776632	1	0.874275
GATK	Platypus	VarScan	LoFreq	FreeBayes	SNVer	NA	NA	0.773196	1	0.872093
GATK	Platypus	VarScan	LoFreq	FreeBayes	SAMtools	NA	NA	0.814433	1	0.897727
GATK	Platypus	VarScan	LoFreq	FreeBayes	VarDict	NA	NA	0.80756	1	0.893536
GATK	Platypus	VarScan	LoFreq	SNVer	SAMtools	NA	NA	0.769759	1	0.869903
GATK	Platypus	VarScan	LoFreq	SNVer	VarDict	NA	NA	0.766323	1	0.867704
GATK	Platypus	VarScan	LoFreq	SAMtools	VarDict	NA	NA	0.804124	1	0.891429
GATK	Platypus	VarScan	FreeBayes	SNVer	SAMtools	NA	NA	0.786942	1	0.880769
GATK	Platypus	VarScan	FreeBayes	SNVer	VarDict	NA	NA	0.824742	1	0.903955
GATK	Platypus	VarScan	FreeBayes	SAMtools	VarDict	NA	NA	0.821306	1	0.901887
GATK	Platypus	VarScan	SNVer	SAMtools	VarDict	NA	NA	0.783505	1	0.878613
GATK	Platypus	LoFreq	FreeBayes	SNVer	SAMtools	NA	NA	0.780069	1	0.876448
GATK	Platypus	LoFreq	FreeBayes	SNVer	VarDict	NA	NA	0.790378	1	0.882917
GATK	Platypus	LoFreq	FreeBayes	SAMtools	VarDict	NA	NA	0.814433	1	0.897727	best 6tool combination of both training sets
GATK	Platypus	LoFreq	SNVer	SAMtools	VarDict	NA	NA	0.773196	1	0.872093
GATK	Platypus	FreeBayes	SNVer	SAMtools	VarDict	NA	NA	0.790378	1	0.882917
GATK	VarScan	LoFreq	FreeBayes	SNVer	SAMtools	NA	NA	0.769759	1	0.869903
GATK	VarScan	LoFreq	FreeBayes	SNVer	VarDict	NA	NA	0.766323	1	0.867704
GATK	VarScan	LoFreq	FreeBayes	SAMtools	VarDict	NA	NA	0.804124	1	0.891429
GATK	VarScan	LoFreq	SNVer	SAMtools	VarDict	NA	NA	0.762887	1	0.865497
GATK	VarScan	FreeBayes	SNVer	SAMtools	VarDict	NA	NA	0.780069	1	0.876448
GATK	LoFreq	FreeBayes	SNVer	SAMtools	VarDict	NA	NA	0.773196	1	0.872093
Platypus	VarScan	LoFreq	FreeBayes	SNVer	SAMtools	NA	NA	0.773196	1	0.872093
Platypus	VarScan	LoFreq	FreeBayes	SNVer	VarDict	NA	NA	0.769759	1	0.869903
Platypus	VarScan	LoFreq	FreeBayes	SAMtools	VarDict	NA	NA	0.80756	1	0.893536
Platypus	VarScan	LoFreq	SNVer	SAMtools	VarDict	NA	NA	0.766323	1	0.867704
Platypus	VarScan	FreeBayes	SNVer	SAMtools	VarDict	NA	NA	0.783505	1	0.878613
Platypus	LoFreq	FreeBayes	SNVer	SAMtools	VarDict	NA	NA	0.776632	1	0.874275
VarScan	LoFreq	FreeBayes	SNVer	SAMtools	VarDict	NA	NA	0.766323	1	0.867704
GATK	Platypus	VarScan	LoFreq	FreeBayes	SNVer	SAMtools	NA	0.769759	1	0.869903
GATK	Platypus	VarScan	LoFreq	FreeBayes	SNVer	VarDict	NA	0.766323	1	0.867704
GATK	Platypus	VarScan	LoFreq	FreeBayes	SAMtools	VarDict	NA	0.804124	1	0.891429	best 7tool combination of both training sets
GATK	Platypus	VarScan	LoFreq	SNVer	SAMtools	VarDict	NA	0.762887	1	0.865497
GATK	Platypus	VarScan	FreeBayes	SNVer	SAMtools	VarDict	NA	0.780069	1	0.876448
GATK	Platypus	LoFreq	FreeBayes	SNVer	SAMtools	VarDict	NA	0.773196	1	0.872093
GATK	VarScan	LoFreq	FreeBayes	SNVer	SAMtools	VarDict	NA	0.762887	1	0.865497
Platypus	VarScan	LoFreq	FreeBayes	SNVer	SAMtools	VarDict	NA	0.766323	1	0.867704
GATK	Platypus	VarScan	LoFreq	FreeBayes	SNVer	SAMtools	VarDict	0.762887	1	0.865497	8 tools

## Sheet: Training 2
Caller 1	Caller 2	Caller 3	Caller 4	Caller 5	Caller 6	Caller 7	Caller 8	Sensitivity	PPV	F1
GATK	NA	NA	NA	NA	NA	NA	NA	0.81775	0.710744	0.760501	best single tool of both training sets
Platypus	NA	NA	NA	NA	NA	NA	NA	0.9271	0.42422	0.58209
VarScan	NA	NA	NA	NA	NA	NA	NA	0.465927	0.731343	0.569216
LoFreq	NA	NA	NA	NA	NA	NA	NA	0.776545	0.229186	0.353918
FreeBayes	NA	NA	NA	NA	NA	NA	NA	0.993661	0.0153729	0.0302774
SNVer	NA	NA	NA	NA	NA	NA	NA	0.545166	0.0728814	0.128574
SAMtools	NA	NA	NA	NA	NA	NA	NA	0.637084	0.771593	0.697917
VarDict	NA	NA	NA	NA	NA	NA	NA	0.942948	0.145016	0.251373	best solution training set 1
GATK	Platypus	NA	NA	NA	NA	NA	NA	0.816165	0.924596	0.867003
GATK	VarScan	NA	NA	NA	NA	NA	NA	0.451664	0.959596	0.614224
GATK	LoFreq	NA	NA	NA	NA	NA	NA	0.709984	0.826568	0.763853
GATK	FreeBayes	NA	NA	NA	NA	NA	NA	0.81458	0.718881	0.763744
GATK	SNVer	NA	NA	NA	NA	NA	NA	0.426307	0.807808	0.558091
GATK	SAMtools	NA	NA	NA	NA	NA	NA	0.621236	0.956098	0.753122
GATK	VarDict	NA	NA	NA	NA	NA	NA	0.782884	0.848797	0.814509
Platypus	VarScan	NA	NA	NA	NA	NA	NA	0.464342	0.939103	0.621421
Platypus	LoFreq	NA	NA	NA	NA	NA	NA	0.754358	0.776509	0.765273
Platypus	FreeBayes	NA	NA	NA	NA	NA	NA	0.92393	0.458694	0.613039
Platypus	SNVer	NA	NA	NA	NA	NA	NA	0.510301	0.4025	0.450035
Platypus	SAMtools	NA	NA	NA	NA	NA	NA	0.637084	0.941452	0.759924
Platypus	VarDict	NA	NA	NA	NA	NA	NA	0.876387	0.958406	0.915563	best combination of both training sets
VarScan	LoFreq	NA	NA	NA	NA	NA	NA	0.44374	0.903226	0.595112
VarScan	FreeBayes	NA	NA	NA	NA	NA	NA	0.465927	0.757732	0.577036
VarScan	SNVer	NA	NA	NA	NA	NA	NA	0.22504	0.97931	0.365979
VarScan	SAMtools	NA	NA	NA	NA	NA	NA	0.40729	0.769461	0.532642
VarScan	VarDict	NA	NA	NA	NA	NA	NA	0.462758	0.898462	0.610879
LoFreq	FreeBayes	NA	NA	NA	NA	NA	NA	0.771791	0.239077	0.365067
LoFreq	SNVer	NA	NA	NA	NA	NA	NA	0.354992	0.482759	0.409132
LoFreq	SAMtools	NA	NA	NA	NA	NA	NA	0.580032	0.955614	0.721893
LoFreq	VarDict	NA	NA	NA	NA	NA	NA	0.759113	0.284104	0.413466
FreeBayes	SNVer	NA	NA	NA	NA	NA	NA	0.541997	0.0728124	0.128378
FreeBayes	SAMtools	NA	NA	NA	NA	NA	NA	0.637084	0.800797	0.70962
FreeBayes	VarDict	NA	NA	NA	NA	NA	NA	0.941363	0.150076	0.25888
SNVer	SAMtools	NA	NA	NA	NA	NA	NA	0.278922	0.967033	0.432964
SNVer	VarDict	NA	NA	NA	NA	NA	NA	0.496038	0.2506	0.332979
SAMtools	VarDict	NA	NA	NA	NA	NA	NA	0.630745	0.954436	0.759542
GATK	Platypus	VarScan	NA	NA	NA	NA	NA	0.451664	0.976027	0.617551
GATK	Platypus	LoFreq	NA	NA	NA	NA	NA	0.708399	0.973856	0.820183
GATK	Platypus	FreeBayes	NA	NA	NA	NA	NA	0.812995	0.929348	0.867287
GATK	Platypus	SNVer	NA	NA	NA	NA	NA	0.424723	0.902357	0.577586
GATK	Platypus	SAMtools	NA	NA	NA	NA	NA	0.621236	0.975124	0.758955
GATK	Platypus	VarDict	NA	NA	NA	NA	NA	0.7813	0.978175	0.868722
GATK	VarScan	LoFreq	NA	NA	NA	NA	NA	0.431062	0.989091	0.600442
GATK	VarScan	FreeBayes	NA	NA	NA	NA	NA	0.451664	0.959596	0.614224
GATK	VarScan	SNVer	NA	NA	NA	NA	NA	0.215531	0.985507	0.353706
GATK	VarScan	SAMtools	NA	NA	NA	NA	NA	0.400951	0.958333	0.565363
GATK	VarScan	VarDict	NA	NA	NA	NA	NA	0.448494	0.986063	0.616558
GATK	LoFreq	FreeBayes	NA	NA	NA	NA	NA	0.708399	0.837079	0.767382
GATK	LoFreq	SNVer	NA	NA	NA	NA	NA	0.328051	0.932432	0.485346
GATK	LoFreq	SAMtools	NA	NA	NA	NA	NA	0.572108	0.989041	0.7249
GATK	LoFreq	VarDict	NA	NA	NA	NA	NA	0.700475	0.837121	0.762726
GATK	FreeBayes	SNVer	NA	NA	NA	NA	NA	0.423138	0.814024	0.55683
GATK	FreeBayes	SAMtools	NA	NA	NA	NA	NA	0.621236	0.960784	0.754572
GATK	FreeBayes	VarDict	NA	NA	NA	NA	NA	0.782884	0.856153	0.817881
GATK	SNVer	SAMtools	NA	NA	NA	NA	NA	0.270998	0.977143	0.424318
GATK	SNVer	VarDict	NA	NA	NA	NA	NA	0.394612	0.950382	0.557671
GATK	SAMtools	VarDict	NA	NA	NA	NA	NA	0.614897	0.987277	0.757812
Platypus	VarScan	LoFreq	NA	NA	NA	NA	NA	0.442155	0.985866	0.610503
Platypus	VarScan	FreeBayes	NA	NA	NA	NA	NA	0.464342	0.939103	0.621421
Platypus	VarScan	SNVer	NA	NA	NA	NA	NA	0.223455	0.979167	0.363871
Platypus	VarScan	SAMtools	NA	NA	NA	NA	NA	0.40729	0.931159	0.566703
Platypus	VarScan	VarDict	NA	NA	NA	NA	NA	0.461173	0.983108	0.627832
Platypus	LoFreq	FreeBayes	NA	NA	NA	NA	NA	0.752773	0.779967	0.766129
Platypus	LoFreq	SNVer	NA	NA	NA	NA	NA	0.350238	0.744108	0.476293
Platypus	LoFreq	SAMtools	NA	NA	NA	NA	NA	0.580032	0.986523	0.730539
Platypus	LoFreq	VarDict	NA	NA	NA	NA	NA	0.73851	0.964803	0.836625
Platypus	FreeBayes	SNVer	NA	NA	NA	NA	NA	0.507132	0.403023	0.449123
Platypus	FreeBayes	SAMtools	NA	NA	NA	NA	NA	0.637084	0.943662	0.760643
Platypus	FreeBayes	VarDict	NA	NA	NA	NA	NA	0.876387	0.960069	0.916321	best 3tool combination of both training sets	best solution training set 2
Platypus	SNVer	SAMtools	NA	NA	NA	NA	NA	0.278922	0.972376	0.433498
Platypus	SNVer	VarDict	NA	NA	NA	NA	NA	0.464342	0.933121	0.620106
Platypus	SAMtools	VarDict	NA	NA	NA	NA	NA	0.630745	0.985149	0.769082
VarScan	LoFreq	FreeBayes	NA	NA	NA	NA	NA	0.44374	0.903226	0.595112
VarScan	LoFreq	SNVer	NA	NA	NA	NA	NA	0.207607	0.977612	0.342484
VarScan	LoFreq	SAMtools	NA	NA	NA	NA	NA	0.389857	0.949807	0.552809
VarScan	LoFreq	VarDict	NA	NA	NA	NA	NA	0.440571	0.923588	0.596567
VarScan	FreeBayes	SNVer	NA	NA	NA	NA	NA	0.22504	0.97931	0.365979
VarScan	FreeBayes	SAMtools	NA	NA	NA	NA	NA	0.40729	0.800623	0.539916
VarScan	FreeBayes	VarDict	NA	NA	NA	NA	NA	0.462758	0.898462	0.610879
VarScan	SNVer	SAMtools	NA	NA	NA	NA	NA	0.180666	0.974359	0.304813
VarScan	SNVer	VarDict	NA	NA	NA	NA	NA	0.22504	0.97931	0.365979
VarScan	SAMtools	VarDict	NA	NA	NA	NA	NA	0.40412	0.947955	0.566667
LoFreq	FreeBayes	SNVer	NA	NA	NA	NA	NA	0.353407	0.484783	0.408799
LoFreq	FreeBayes	SAMtools	NA	NA	NA	NA	NA	0.580032	0.958115	0.722606
LoFreq	FreeBayes	VarDict	NA	NA	NA	NA	NA	0.757528	0.296342	0.426025
LoFreq	SNVer	SAMtools	NA	NA	NA	NA	NA	0.229794	0.973154	0.371795
LoFreq	SNVer	VarDict	NA	NA	NA	NA	NA	0.342314	0.580645	0.430708
LoFreq	SAMtools	VarDict	NA	NA	NA	NA	NA	0.576862	0.955381	0.719368
FreeBayes	SNVer	SAMtools	NA	NA	NA	NA	NA	0.278922	0.972376	0.433498
FreeBayes	SNVer	VarDict	NA	NA	NA	NA	NA	0.496038	0.251406	0.333689
FreeBayes	SAMtools	VarDict	NA	NA	NA	NA	NA	0.630745	0.956731	0.760267
SNVer	SAMtools	VarDict	NA	NA	NA	NA	NA	0.275753	0.972067	0.42963
GATK	Platypus	VarScan	LoFreq	NA	NA	NA	NA	0.431062	0.989091	0.600442
GATK	Platypus	VarScan	FreeBayes	NA	NA	NA	NA	0.451664	0.976027	0.617551
GATK	Platypus	VarScan	SNVer	NA	NA	NA	NA	0.215531	0.985507	0.353706
GATK	Platypus	VarScan	SAMtools	NA	NA	NA	NA	0.400951	0.973077	0.567901
GATK	Platypus	VarScan	VarDict	NA	NA	NA	NA	0.448494	0.986063	0.616558
GATK	Platypus	LoFreq	FreeBayes	NA	NA	NA	NA	0.706815	0.98022	0.821363
GATK	Platypus	LoFreq	SNVer	NA	NA	NA	NA	0.326466	0.949309	0.485849
GATK	Platypus	LoFreq	SAMtools	NA	NA	NA	NA	0.572108	0.989041	0.7249
GATK	Platypus	LoFreq	VarDict	NA	NA	NA	NA	0.698891	0.977827	0.815157
GATK	Platypus	FreeBayes	SNVer	NA	NA	NA	NA	0.421553	0.910959	0.576381
GATK	Platypus	FreeBayes	SAMtools	NA	NA	NA	NA	0.621236	0.977556	0.75969
GATK	Platypus	FreeBayes	VarDict	NA	NA	NA	NA	0.7813	0.980119	0.869489	best 4tool combination of both training sets
GATK	Platypus	SNVer	SAMtools	NA	NA	NA	NA	0.270998	0.977143	0.424318
GATK	Platypus	SNVer	VarDict	NA	NA	NA	NA	0.393027	0.964981	0.558559
GATK	Platypus	SAMtools	VarDict	NA	NA	NA	NA	0.614897	0.987277	0.757812
GATK	VarScan	LoFreq	FreeBayes	NA	NA	NA	NA	0.431062	0.989091	0.600442
GATK	VarScan	LoFreq	SNVer	NA	NA	NA	NA	0.199683	0.984375	0.332016
GATK	VarScan	LoFreq	SAMtools	NA	NA	NA	NA	0.385103	0.987805	0.554162
GATK	VarScan	LoFreq	VarDict	NA	NA	NA	NA	0.427892	0.989011	0.597345
GATK	VarScan	FreeBayes	SNVer	NA	NA	NA	NA	0.215531	0.985507	0.353706
GATK	VarScan	FreeBayes	SAMtools	NA	NA	NA	NA	0.400951	0.958333	0.565363
GATK	VarScan	FreeBayes	VarDict	NA	NA	NA	NA	0.448494	0.986063	0.616558
GATK	VarScan	SNVer	SAMtools	NA	NA	NA	NA	0.179081	0.982609	0.302949
GATK	VarScan	SNVer	VarDict	NA	NA	NA	NA	0.215531	0.985507	0.353706
GATK	VarScan	SAMtools	VarDict	NA	NA	NA	NA	0.397781	0.984314	0.566591
GATK	LoFreq	FreeBayes	SNVer	NA	NA	NA	NA	0.326466	0.944954	0.485277
GATK	LoFreq	FreeBayes	SAMtools	NA	NA	NA	NA	0.572108	0.991758	0.725628
GATK	LoFreq	FreeBayes	VarDict	NA	NA	NA	NA	0.700475	0.845124	0.766031
GATK	LoFreq	SNVer	SAMtools	NA	NA	NA	NA	0.229794	0.97973	0.372272
GATK	LoFreq	SNVer	VarDict	NA	NA	NA	NA	0.321712	0.939815	0.479339
GATK	LoFreq	SAMtools	VarDict	NA	NA	NA	NA	0.568938	0.988981	0.722334
GATK	FreeBayes	SNVer	SAMtools	NA	NA	NA	NA	0.270998	0.982759	0.424845
GATK	FreeBayes	SNVer	VarDict	NA	NA	NA	NA	0.394612	0.954023	0.558296
GATK	FreeBayes	SAMtools	VarDict	NA	NA	NA	NA	0.614897	0.989796	0.758553
GATK	SNVer	SAMtools	VarDict	NA	NA	NA	NA	0.267829	0.982558	0.420922
Platypus	VarScan	LoFreq	FreeBayes	NA	NA	NA	NA	0.442155	0.985866	0.610503
Platypus	VarScan	LoFreq	SNVer	NA	NA	NA	NA	0.206022	0.977444	0.340314
Platypus	VarScan	LoFreq	SAMtools	NA	NA	NA	NA	0.389857	0.984	0.558456
Platypus	VarScan	LoFreq	VarDict	NA	NA	NA	NA	0.438986	0.985765	0.607456
Platypus	VarScan	FreeBayes	SNVer	NA	NA	NA	NA	0.223455	0.979167	0.363871
Platypus	VarScan	FreeBayes	SAMtools	NA	NA	NA	NA	0.40729	0.931159	0.566703
Platypus	VarScan	FreeBayes	VarDict	NA	NA	NA	NA	0.461173	0.983108	0.627832
Platypus	VarScan	SNVer	SAMtools	NA	NA	NA	NA	0.180666	0.974359	0.304813
Platypus	VarScan	SNVer	VarDict	NA	NA	NA	NA	0.223455	0.979167	0.363871
Platypus	VarScan	SAMtools	VarDict	NA	NA	NA	NA	0.40412	0.980769	0.572391
Platypus	LoFreq	FreeBayes	SNVer	NA	NA	NA	NA	0.348653	0.750853	0.47619
Platypus	LoFreq	FreeBayes	SAMtools	NA	NA	NA	NA	0.580032	0.989189	0.731269
Platypus	LoFreq	FreeBayes	VarDict	NA	NA	NA	NA	0.73851	0.966805	0.837376
Platypus	LoFreq	SNVer	SAMtools	NA	NA	NA	NA	0.229794	0.973154	0.371795
Platypus	LoFreq	SNVer	VarDict	NA	NA	NA	NA	0.337559	0.930131	0.495349
Platypus	LoFreq	SAMtools	VarDict	NA	NA	NA	NA	0.576862	0.98645	0.728
Platypus	FreeBayes	SNVer	SAMtools	NA	NA	NA	NA	0.278922	0.977778	0.434032
Platypus	FreeBayes	SNVer	VarDict	NA	NA	NA	NA	0.464342	0.936102	0.620763
Platypus	FreeBayes	SAMtools	VarDict	NA	NA	NA	NA	0.630745	0.987593	0.769826
Platypus	SNVer	SAMtools	VarDict	NA	NA	NA	NA	0.275753	0.977528	0.430161
VarScan	LoFreq	FreeBayes	SNVer	NA	NA	NA	NA	0.207607	0.977612	0.342484
VarScan	LoFreq	FreeBayes	SAMtools	NA	NA	NA	NA	0.389857	0.949807	0.552809
VarScan	LoFreq	FreeBayes	VarDict	NA	NA	NA	NA	0.440571	0.923588	0.596567
VarScan	LoFreq	SNVer	SAMtools	NA	NA	NA	NA	0.166403	0.972222	0.284168
VarScan	LoFreq	SNVer	VarDict	NA	NA	NA	NA	0.207607	0.977612	0.342484
VarScan	LoFreq	SAMtools	VarDict	NA	NA	NA	NA	0.386688	0.949416	0.54955
VarScan	FreeBayes	SNVer	SAMtools	NA	NA	NA	NA	0.180666	0.974359	0.304813
VarScan	FreeBayes	SNVer	VarDict	NA	NA	NA	NA	0.22504	0.97931	0.365979
VarScan	FreeBayes	SAMtools	VarDict	NA	NA	NA	NA	0.40412	0.947955	0.566667
VarScan	SNVer	SAMtools	VarDict	NA	NA	NA	NA	0.180666	0.974359	0.304813
LoFreq	FreeBayes	SNVer	SAMtools	NA	NA	NA	NA	0.229794	0.97973	0.372272
LoFreq	FreeBayes	SNVer	VarDict	NA	NA	NA	NA	0.342314	0.58221	0.431138
LoFreq	FreeBayes	SAMtools	VarDict	NA	NA	NA	NA	0.576862	0.957895	0.720079
LoFreq	SNVer	SAMtools	VarDict	NA	NA	NA	NA	0.229794	0.973154	0.371795
FreeBayes	SNVer	SAMtools	VarDict	NA	NA	NA	NA	0.275753	0.977528	0.430161
GATK	Platypus	VarScan	LoFreq	FreeBayes	NA	NA	NA	0.431062	0.989091	0.600442
GATK	Platypus	VarScan	LoFreq	SNVer	NA	NA	NA	0.199683	0.984375	0.332016
GATK	Platypus	VarScan	LoFreq	SAMtools	NA	NA	NA	0.385103	0.987805	0.554162
GATK	Platypus	VarScan	LoFreq	VarDict	NA	NA	NA	0.427892	0.989011	0.597345
GATK	Platypus	VarScan	FreeBayes	SNVer	NA	NA	NA	0.215531	0.985507	0.353706
GATK	Platypus	VarScan	FreeBayes	SAMtools	NA	NA	NA	0.400951	0.973077	0.567901
GATK	Platypus	VarScan	FreeBayes	VarDict	NA	NA	NA	0.448494	0.986063	0.616558
GATK	Platypus	VarScan	SNVer	SAMtools	NA	NA	NA	0.179081	0.982609	0.302949
GATK	Platypus	VarScan	SNVer	VarDict	NA	NA	NA	0.215531	0.985507	0.353706
GATK	Platypus	VarScan	SAMtools	VarDict	NA	NA	NA	0.397781	0.984314	0.566591
GATK	Platypus	LoFreq	FreeBayes	SNVer	NA	NA	NA	0.324881	0.962441	0.485782
GATK	Platypus	LoFreq	FreeBayes	SAMtools	NA	NA	NA	0.572108	0.991758	0.725628
GATK	Platypus	LoFreq	FreeBayes	VarDict	NA	NA	NA	0.698891	0.98	0.815911	best 5tool combination of both training sets
GATK	Platypus	LoFreq	SNVer	SAMtools	NA	NA	NA	0.229794	0.97973	0.372272
GATK	Platypus	LoFreq	SNVer	VarDict	NA	NA	NA	0.320127	0.957346	0.47981
GATK	Platypus	LoFreq	SAMtools	VarDict	NA	NA	NA	0.568938	0.988981	0.722334
GATK	Platypus	FreeBayes	SNVer	SAMtools	NA	NA	NA	0.270998	0.982759	0.424845
GATK	Platypus	FreeBayes	SNVer	VarDict	NA	NA	NA	0.393027	0.96875	0.559188
GATK	Platypus	FreeBayes	SAMtools	VarDict	NA	NA	NA	0.614897	0.989796	0.758553
GATK	Platypus	SNVer	SAMtools	VarDict	NA	NA	NA	0.267829	0.982558	0.420922
GATK	VarScan	LoFreq	FreeBayes	SNVer	NA	NA	NA	0.199683	0.984375	0.332016
GATK	VarScan	LoFreq	FreeBayes	SAMtools	NA	NA	NA	0.385103	0.987805	0.554162
GATK	VarScan	LoFreq	FreeBayes	VarDict	NA	NA	NA	0.427892	0.989011	0.597345
GATK	VarScan	LoFreq	SNVer	SAMtools	NA	NA	NA	0.166403	0.981308	0.284553
GATK	VarScan	LoFreq	SNVer	VarDict	NA	NA	NA	0.199683	0.984375	0.332016
GATK	VarScan	LoFreq	SAMtools	VarDict	NA	NA	NA	0.381933	0.987705	0.550857
GATK	VarScan	FreeBayes	SNVer	SAMtools	NA	NA	NA	0.179081	0.982609	0.302949
GATK	VarScan	FreeBayes	SNVer	VarDict	NA	NA	NA	0.215531	0.985507	0.353706
GATK	VarScan	FreeBayes	SAMtools	VarDict	NA	NA	NA	0.397781	0.984314	0.566591
GATK	VarScan	SNVer	SAMtools	VarDict	NA	NA	NA	0.179081	0.982609	0.302949
GATK	LoFreq	FreeBayes	SNVer	SAMtools	NA	NA	NA	0.229794	0.986395	0.372751
GATK	LoFreq	FreeBayes	SNVer	VarDict	NA	NA	NA	0.321712	0.944186	0.479905
GATK	LoFreq	FreeBayes	SAMtools	VarDict	NA	NA	NA	0.568938	0.991713	0.723061
GATK	LoFreq	SNVer	SAMtools	VarDict	NA	NA	NA	0.229794	0.97973	0.372272
GATK	FreeBayes	SNVer	SAMtools	VarDict	NA	NA	NA	0.267829	0.988304	0.421446
Platypus	VarScan	LoFreq	FreeBayes	SNVer	NA	NA	NA	0.206022	0.977444	0.340314
Platypus	VarScan	LoFreq	FreeBayes	SAMtools	NA	NA	NA	0.389857	0.984	0.558456
Platypus	VarScan	LoFreq	FreeBayes	VarDict	NA	NA	NA	0.438986	0.985765	0.607456
Platypus	VarScan	LoFreq	SNVer	SAMtools	NA	NA	NA	0.166403	0.972222	0.284168
Platypus	VarScan	LoFreq	SNVer	VarDict	NA	NA	NA	0.206022	0.977444	0.340314
Platypus	VarScan	LoFreq	SAMtools	VarDict	NA	NA	NA	0.386688	0.983871	0.555176
Platypus	VarScan	FreeBayes	SNVer	SAMtools	NA	NA	NA	0.180666	0.974359	0.304813
Platypus	VarScan	FreeBayes	SNVer	VarDict	NA	NA	NA	0.223455	0.979167	0.363871
Platypus	VarScan	FreeBayes	SAMtools	VarDict	NA	NA	NA	0.40412	0.980769	0.572391
Platypus	VarScan	SNVer	SAMtools	VarDict	NA	NA	NA	0.180666	0.974359	0.304813
Platypus	LoFreq	FreeBayes	SNVer	SAMtools	NA	NA	NA	0.229794	0.97973	0.372272
Platypus	LoFreq	FreeBayes	SNVer	VarDict	NA	NA	NA	0.337559	0.934211	0.495925
Platypus	LoFreq	FreeBayes	SAMtools	VarDict	NA	NA	NA	0.576862	0.98913	0.728729
Platypus	LoFreq	SNVer	SAMtools	VarDict	NA	NA	NA	0.229794	0.973154	0.371795
Platypus	FreeBayes	SNVer	SAMtools	VarDict	NA	NA	NA	0.275753	0.983051	0.430693
VarScan	LoFreq	FreeBayes	SNVer	SAMtools	NA	NA	NA	0.166403	0.972222	0.284168
VarScan	LoFreq	FreeBayes	SNVer	VarDict	NA	NA	NA	0.207607	0.977612	0.342484
VarScan	LoFreq	FreeBayes	SAMtools	VarDict	NA	NA	NA	0.386688	0.949416	0.54955
VarScan	LoFreq	SNVer	SAMtools	VarDict	NA	NA	NA	0.166403	0.972222	0.284168
VarScan	FreeBayes	SNVer	SAMtools	VarDict	NA	NA	NA	0.180666	0.974359	0.304813
LoFreq	FreeBayes	SNVer	SAMtools	VarDict	NA	NA	NA	0.229794	0.97973	0.372272
GATK	Platypus	VarScan	LoFreq	FreeBayes	SNVer	NA	NA	0.199683	0.984375	0.332016
GATK	Platypus	VarScan	LoFreq	FreeBayes	SAMtools	NA	NA	0.385103	0.987805	0.554162
GATK	Platypus	VarScan	LoFreq	FreeBayes	VarDict	NA	NA	0.427892	0.989011	0.597345
GATK	Platypus	VarScan	LoFreq	SNVer	SAMtools	NA	NA	0.166403	0.981308	0.284553
GATK	Platypus	VarScan	LoFreq	SNVer	VarDict	NA	NA	0.199683	0.984375	0.332016
GATK	Platypus	VarScan	LoFreq	SAMtools	VarDict	NA	NA	0.381933	0.987705	0.550857
GATK	Platypus	VarScan	FreeBayes	SNVer	SAMtools	NA	NA	0.179081	0.982609	0.302949
GATK	Platypus	VarScan	FreeBayes	SNVer	VarDict	NA	NA	0.215531	0.985507	0.353706
GATK	Platypus	VarScan	FreeBayes	SAMtools	VarDict	NA	NA	0.397781	0.984314	0.566591
GATK	Platypus	VarScan	SNVer	SAMtools	VarDict	NA	NA	0.179081	0.982609	0.302949
GATK	Platypus	LoFreq	FreeBayes	SNVer	SAMtools	NA	NA	0.229794	0.986395	0.372751
GATK	Platypus	LoFreq	FreeBayes	SNVer	VarDict	NA	NA	0.320127	0.961905	0.48038
GATK	Platypus	LoFreq	FreeBayes	SAMtools	VarDict	NA	NA	0.568938	0.991713	0.723061	best 6tool combination of both training sets
GATK	Platypus	LoFreq	SNVer	SAMtools	VarDict	NA	NA	0.229794	0.97973	0.372272
GATK	Platypus	FreeBayes	SNVer	SAMtools	VarDict	NA	NA	0.267829	0.988304	0.421446
GATK	VarScan	LoFreq	FreeBayes	SNVer	SAMtools	NA	NA	0.166403	0.981308	0.284553
GATK	VarScan	LoFreq	FreeBayes	SNVer	VarDict	NA	NA	0.199683	0.984375	0.332016
GATK	VarScan	LoFreq	FreeBayes	SAMtools	VarDict	NA	NA	0.381933	0.987705	0.550857
GATK	VarScan	LoFreq	SNVer	SAMtools	VarDict	NA	NA	0.166403	0.981308	0.284553
GATK	VarScan	FreeBayes	SNVer	SAMtools	VarDict	NA	NA	0.179081	0.982609	0.302949
GATK	LoFreq	FreeBayes	SNVer	SAMtools	VarDict	NA	NA	0.229794	0.986395	0.372751
Platypus	VarScan	LoFreq	FreeBayes	SNVer	SAMtools	NA	NA	0.166403	0.972222	0.284168
Platypus	VarScan	LoFreq	FreeBayes	SNVer	VarDict	NA	NA	0.206022	0.977444	0.340314
Platypus	VarScan	LoFreq	FreeBayes	SAMtools	VarDict	NA	NA	0.386688	0.983871	0.555176
Platypus	VarScan	LoFreq	SNVer	SAMtools	VarDict	NA	NA	0.166403	0.972222	0.284168
Platypus	VarScan	FreeBayes	SNVer	SAMtools	VarDict	NA	NA	0.180666	0.974359	0.304813
Platypus	LoFreq	FreeBayes	SNVer	SAMtools	VarDict	NA	NA	0.229794	0.97973	0.372272
VarScan	LoFreq	FreeBayes	SNVer	SAMtools	VarDict	NA	NA	0.166403	0.972222	0.284168
GATK	Platypus	VarScan	LoFreq	FreeBayes	SNVer	SAMtools	NA	0.166403	0.981308	0.284553
GATK	Platypus	VarScan	LoFreq	FreeBayes	SNVer	VarDict	NA	0.199683	0.984375	0.332016
GATK	Platypus	VarScan	LoFreq	FreeBayes	SAMtools	VarDict	NA	0.381933	0.987705	0.550857	best 7tool combination of both training sets
GATK	Platypus	VarScan	LoFreq	SNVer	SAMtools	VarDict	NA	0.166403	0.981308	0.284553
GATK	Platypus	VarScan	FreeBayes	SNVer	SAMtools	VarDict	NA	0.179081	0.982609	0.302949
GATK	Platypus	LoFreq	FreeBayes	SNVer	SAMtools	VarDict	NA	0.229794	0.986395	0.372751
GATK	VarScan	LoFreq	FreeBayes	SNVer	SAMtools	VarDict	NA	0.166403	0.981308	0.284553
Platypus	VarScan	LoFreq	FreeBayes	SNVer	SAMtools	VarDict	NA	0.166403	0.972222	0.284168
GATK	Platypus	VarScan	LoFreq	FreeBayes	SNVer	SAMtools	VarDict	0.166403	0.981308	0.284553	8 tools

## Sheet: Test 1
Caller 1	Caller 2	Caller 3	Caller 4	Caller 5	Caller 6	Caller 7	Caller 8	Sensitivity	PPV	F1
GATK	NA	NA	NA	NA	NA	NA	NA	0.920296	0.817518	0.865868	best single tool of both training sets
Platypus	NA	NA	NA	NA	NA	NA	NA	0.935086	0.807092	0.866388
VarScan	NA	NA	NA	NA	NA	NA	NA	0.843057	0.843057	0.843057
LoFreq	NA	NA	NA	NA	NA	NA	NA	0.983566	0.286295	0.443498
FreeBayes	NA	NA	NA	NA	NA	NA	NA	0.990961	0.0236763	0.0462477
SNVer	NA	NA	NA	NA	NA	NA	NA	0.916187	0.906504	0.91132
SAMtools	NA	NA	NA	NA	NA	NA	NA	0.824979	0.828383	0.826678
VarDict	NA	NA	NA	NA	NA	NA	NA	0.966311	0.776238	0.860908	best solution training set 1
GATK	Platypus	NA	NA	NA	NA	NA	NA	0.917831	0.968777	0.942616
GATK	VarScan	NA	NA	NA	NA	NA	NA	0.83977	0.927405	0.881414
GATK	LoFreq	NA	NA	NA	NA	NA	NA	0.911257	0.971954	0.940628
GATK	FreeBayes	NA	NA	NA	NA	NA	NA	0.917831	0.819516	0.865891
GATK	SNVer	NA	NA	NA	NA	NA	NA	0.860312	0.985876	0.918824
GATK	SAMtools	NA	NA	NA	NA	NA	NA	0.822514	0.965284	0.888199
GATK	VarDict	NA	NA	NA	NA	NA	NA	0.894002	0.990893	0.939957
Platypus	VarScan	NA	NA	NA	NA	NA	NA	0.843057	0.897638	0.869492
Platypus	LoFreq	NA	NA	NA	NA	NA	NA	0.925226	0.974048	0.94901
Platypus	FreeBayes	NA	NA	NA	NA	NA	NA	0.930156	0.81147	0.866769
Platypus	SNVer	NA	NA	NA	NA	NA	NA	0.869351	0.982358	0.922406
Platypus	SAMtools	NA	NA	NA	NA	NA	NA	0.824979	0.84869	0.836667
Platypus	VarDict	NA	NA	NA	NA	NA	NA	0.905505	0.991899	0.946735	best combination of both training sets
VarScan	LoFreq	NA	NA	NA	NA	NA	NA	0.841413	0.989372	0.909414
VarScan	FreeBayes	NA	NA	NA	NA	NA	NA	0.842235	0.843621	0.842928
VarScan	SNVer	NA	NA	NA	NA	NA	NA	0.79129	0.992784	0.880658
VarScan	SAMtools	NA	NA	NA	NA	NA	NA	0.790468	0.902439	0.842751
VarScan	VarDict	NA	NA	NA	NA	NA	NA	0.826623	0.997027	0.903863
LoFreq	FreeBayes	NA	NA	NA	NA	NA	NA	0.974528	0.332866	0.496234
LoFreq	SNVer	NA	NA	NA	NA	NA	NA	0.903862	0.966608	0.934183
LoFreq	SAMtools	NA	NA	NA	NA	NA	NA	0.817584	0.991036	0.895993
LoFreq	VarDict	NA	NA	NA	NA	NA	NA	0.95152	0.934625	0.942997
FreeBayes	SNVer	NA	NA	NA	NA	NA	NA	0.909614	0.915633	0.912613
FreeBayes	SAMtools	NA	NA	NA	NA	NA	NA	0.824979	0.828383	0.826678
FreeBayes	VarDict	NA	NA	NA	NA	NA	NA	0.962202	0.782231	0.862933
SNVer	SAMtools	NA	NA	NA	NA	NA	NA	0.780608	0.994764	0.87477
SNVer	VarDict	NA	NA	NA	NA	NA	NA	0.88825	0.968638	0.926704
SAMtools	VarDict	NA	NA	NA	NA	NA	NA	0.808546	0.995951	0.892517
GATK	Platypus	VarScan	NA	NA	NA	NA	NA	0.83977	0.982692	0.905627
GATK	Platypus	LoFreq	NA	NA	NA	NA	NA	0.908792	0.991039	0.948135
GATK	Platypus	FreeBayes	NA	NA	NA	NA	NA	0.915366	0.968696	0.941276
GATK	Platypus	SNVer	NA	NA	NA	NA	NA	0.857847	0.989573	0.919014
GATK	Platypus	SAMtools	NA	NA	NA	NA	NA	0.822514	0.990109	0.898564
GATK	Platypus	VarDict	NA	NA	NA	NA	NA	0.892358	0.993596	0.94026
GATK	VarScan	LoFreq	NA	NA	NA	NA	NA	0.838127	0.991254	0.908281
GATK	VarScan	FreeBayes	NA	NA	NA	NA	NA	0.838948	0.927339	0.880932
GATK	VarScan	SNVer	NA	NA	NA	NA	NA	0.789647	0.993795	0.880037
GATK	VarScan	SAMtools	NA	NA	NA	NA	NA	0.788003	0.992754	0.878607
GATK	VarScan	VarDict	NA	NA	NA	NA	NA	0.823336	0.997015	0.90189
GATK	LoFreq	FreeBayes	NA	NA	NA	NA	NA	0.908792	0.972735	0.939677
GATK	LoFreq	SNVer	NA	NA	NA	NA	NA	0.852095	0.990449	0.916078
GATK	LoFreq	SAMtools	NA	NA	NA	NA	NA	0.815119	0.995984	0.896521
GATK	LoFreq	VarDict	NA	NA	NA	NA	NA	0.884963	0.9908	0.934896
GATK	FreeBayes	SNVer	NA	NA	NA	NA	NA	0.857847	0.985836	0.917399
GATK	FreeBayes	SAMtools	NA	NA	NA	NA	NA	0.822514	0.965284	0.888199
GATK	FreeBayes	VarDict	NA	NA	NA	NA	NA	0.89318	0.990884	0.939499
GATK	SNVer	SAMtools	NA	NA	NA	NA	NA	0.778965	0.995798	0.874136
GATK	SNVer	VarDict	NA	NA	NA	NA	NA	0.837305	0.99221	0.9082
GATK	SAMtools	VarDict	NA	NA	NA	NA	NA	0.806081	0.995939	0.891008
Platypus	VarScan	LoFreq	NA	NA	NA	NA	NA	0.841413	0.995141	0.911843
Platypus	VarScan	FreeBayes	NA	NA	NA	NA	NA	0.842235	0.897548	0.869012
Platypus	VarScan	SNVer	NA	NA	NA	NA	NA	0.79129	0.994835	0.881465
Platypus	VarScan	SAMtools	NA	NA	NA	NA	NA	0.790468	0.904986	0.84386
Platypus	VarScan	VarDict	NA	NA	NA	NA	NA	0.826623	0.997027	0.903863
Platypus	LoFreq	FreeBayes	NA	NA	NA	NA	NA	0.920296	0.979878	0.949153
Platypus	LoFreq	SNVer	NA	NA	NA	NA	NA	0.860312	0.986805	0.919227
Platypus	LoFreq	SAMtools	NA	NA	NA	NA	NA	0.817584	0.992024	0.896396
Platypus	LoFreq	VarDict	NA	NA	NA	NA	NA	0.895645	0.991811	0.941278
Platypus	FreeBayes	SNVer	NA	NA	NA	NA	NA	0.864421	0.985942	0.921191
Platypus	FreeBayes	SAMtools	NA	NA	NA	NA	NA	0.824979	0.84869	0.836667
Platypus	FreeBayes	VarDict	NA	NA	NA	NA	NA	0.904684	0.991892	0.946283	best 3tool combination of both training sets	best solution training set 2
Platypus	SNVer	SAMtools	NA	NA	NA	NA	NA	0.780608	0.994764	0.87477
Platypus	SNVer	VarDict	NA	NA	NA	NA	NA	0.843057	0.991304	0.91119
Platypus	SAMtools	VarDict	NA	NA	NA	NA	NA	0.808546	0.995951	0.892517
VarScan	LoFreq	FreeBayes	NA	NA	NA	NA	NA	0.840592	0.990319	0.909333
VarScan	LoFreq	SNVer	NA	NA	NA	NA	NA	0.789647	0.995855	0.880843
VarScan	LoFreq	SAMtools	NA	NA	NA	NA	NA	0.788825	0.995851	0.88033
VarScan	LoFreq	VarDict	NA	NA	NA	NA	NA	0.824979	0.997021	0.902878
VarScan	FreeBayes	SNVer	NA	NA	NA	NA	NA	0.790468	0.992776	0.880146
VarScan	FreeBayes	SAMtools	NA	NA	NA	NA	NA	0.790468	0.902439	0.842751
VarScan	FreeBayes	VarDict	NA	NA	NA	NA	NA	0.825801	0.997024	0.903371
VarScan	SNVer	SAMtools	NA	NA	NA	NA	NA	0.746919	0.996711	0.853922
VarScan	SNVer	VarDict	NA	NA	NA	NA	NA	0.778143	0.996842	0.874019
VarScan	SAMtools	VarDict	NA	NA	NA	NA	NA	0.775678	0.996832	0.872458
LoFreq	FreeBayes	SNVer	NA	NA	NA	NA	NA	0.897288	0.969805	0.932138
LoFreq	FreeBayes	SAMtools	NA	NA	NA	NA	NA	0.817584	0.991036	0.895993
LoFreq	FreeBayes	VarDict	NA	NA	NA	NA	NA	0.947412	0.935118	0.941224
LoFreq	SNVer	SAMtools	NA	NA	NA	NA	NA	0.774035	0.99472	0.87061
LoFreq	SNVer	VarDict	NA	NA	NA	NA	NA	0.876746	0.972653	0.922213
LoFreq	SAMtools	VarDict	NA	NA	NA	NA	NA	0.80115	0.995914	0.887978
FreeBayes	SNVer	SAMtools	NA	NA	NA	NA	NA	0.780608	0.994764	0.87477
FreeBayes	SNVer	VarDict	NA	NA	NA	NA	NA	0.885785	0.968553	0.925322
FreeBayes	SAMtools	VarDict	NA	NA	NA	NA	NA	0.808546	0.995951	0.892517
SNVer	SAMtools	VarDict	NA	NA	NA	NA	NA	0.766639	0.995731	0.866295
GATK	Platypus	VarScan	LoFreq	NA	NA	NA	NA	0.838127	0.995122	0.909902
GATK	Platypus	VarScan	FreeBayes	NA	NA	NA	NA	0.838948	0.982676	0.905142
GATK	Platypus	VarScan	SNVer	NA	NA	NA	NA	0.789647	0.995855	0.880843
GATK	Platypus	VarScan	SAMtools	NA	NA	NA	NA	0.788003	0.993782	0.87901
GATK	Platypus	VarScan	VarDict	NA	NA	NA	NA	0.823336	0.997015	0.90189
GATK	Platypus	LoFreq	FreeBayes	NA	NA	NA	NA	0.906327	0.991015	0.946781
GATK	Platypus	LoFreq	SNVer	NA	NA	NA	NA	0.84963	0.991371	0.915044
GATK	Platypus	LoFreq	SAMtools	NA	NA	NA	NA	0.815119	0.995984	0.896521
GATK	Platypus	LoFreq	VarDict	NA	NA	NA	NA	0.88332	0.99353	0.935189
GATK	Platypus	FreeBayes	SNVer	NA	NA	NA	NA	0.855382	0.989544	0.917585
GATK	Platypus	FreeBayes	SAMtools	NA	NA	NA	NA	0.822514	0.990109	0.898564
GATK	Platypus	FreeBayes	VarDict	NA	NA	NA	NA	0.891537	0.99359	0.939801	best 4tool combination of both training sets
GATK	Platypus	SNVer	SAMtools	NA	NA	NA	NA	0.778965	0.995798	0.874136
GATK	Platypus	SNVer	VarDict	NA	NA	NA	NA	0.835661	0.993164	0.907631
GATK	Platypus	SAMtools	VarDict	NA	NA	NA	NA	0.806081	0.995939	0.891008
GATK	VarScan	LoFreq	FreeBayes	NA	NA	NA	NA	0.837305	0.991245	0.907795
GATK	VarScan	LoFreq	SNVer	NA	NA	NA	NA	0.788003	0.995846	0.879817
GATK	VarScan	LoFreq	SAMtools	NA	NA	NA	NA	0.78636	0.996875	0.879192
GATK	VarScan	LoFreq	VarDict	NA	NA	NA	NA	0.821693	0.997009	0.900901
GATK	VarScan	FreeBayes	SNVer	NA	NA	NA	NA	0.788825	0.993789	0.879524
GATK	VarScan	FreeBayes	SAMtools	NA	NA	NA	NA	0.788003	0.992754	0.878607
GATK	VarScan	FreeBayes	VarDict	NA	NA	NA	NA	0.822514	0.997012	0.901396
GATK	VarScan	SNVer	SAMtools	NA	NA	NA	NA	0.745275	0.996703	0.852844
GATK	VarScan	SNVer	VarDict	NA	NA	NA	NA	0.7765	0.996835	0.872979
GATK	VarScan	SAMtools	VarDict	NA	NA	NA	NA	0.773213	0.996822	0.870893
GATK	LoFreq	FreeBayes	SNVer	NA	NA	NA	NA	0.84963	0.990421	0.91464
GATK	LoFreq	FreeBayes	SAMtools	NA	NA	NA	NA	0.815119	0.995984	0.896521
GATK	LoFreq	FreeBayes	VarDict	NA	NA	NA	NA	0.884141	0.990792	0.934433
GATK	LoFreq	SNVer	SAMtools	NA	NA	NA	NA	0.772391	0.995763	0.869968
GATK	LoFreq	SNVer	VarDict	NA	NA	NA	NA	0.829088	0.992134	0.903312
GATK	LoFreq	SAMtools	VarDict	NA	NA	NA	NA	0.798685	0.995902	0.886457
GATK	FreeBayes	SNVer	SAMtools	NA	NA	NA	NA	0.778965	0.995798	0.874136
GATK	FreeBayes	SNVer	VarDict	NA	NA	NA	NA	0.836483	0.992203	0.907713
GATK	FreeBayes	SAMtools	VarDict	NA	NA	NA	NA	0.806081	0.995939	0.891008
GATK	SNVer	SAMtools	VarDict	NA	NA	NA	NA	0.764996	0.995722	0.865242
Platypus	VarScan	LoFreq	FreeBayes	NA	NA	NA	NA	0.840592	0.995136	0.911359
Platypus	VarScan	LoFreq	SNVer	NA	NA	NA	NA	0.789647	0.995855	0.880843
Platypus	VarScan	LoFreq	SAMtools	NA	NA	NA	NA	0.788825	0.996885	0.880734
Platypus	VarScan	LoFreq	VarDict	NA	NA	NA	NA	0.824979	0.997021	0.902878
Platypus	VarScan	FreeBayes	SNVer	NA	NA	NA	NA	0.790468	0.994829	0.880952
Platypus	VarScan	FreeBayes	SAMtools	NA	NA	NA	NA	0.790468	0.904986	0.84386
Platypus	VarScan	FreeBayes	VarDict	NA	NA	NA	NA	0.825801	0.997024	0.903371
Platypus	VarScan	SNVer	SAMtools	NA	NA	NA	NA	0.746919	0.996711	0.853922
Platypus	VarScan	SNVer	VarDict	NA	NA	NA	NA	0.778143	0.996842	0.874019
Platypus	VarScan	SAMtools	VarDict	NA	NA	NA	NA	0.775678	0.996832	0.872458
Platypus	LoFreq	FreeBayes	SNVer	NA	NA	NA	NA	0.855382	0.988604	0.917181
Platypus	LoFreq	FreeBayes	SAMtools	NA	NA	NA	NA	0.817584	0.992024	0.896396
Platypus	LoFreq	FreeBayes	VarDict	NA	NA	NA	NA	0.894823	0.991803	0.940821
Platypus	LoFreq	SNVer	SAMtools	NA	NA	NA	NA	0.774035	0.99472	0.87061
Platypus	LoFreq	SNVer	VarDict	NA	NA	NA	NA	0.834018	0.991211	0.905846
Platypus	LoFreq	SAMtools	VarDict	NA	NA	NA	NA	0.80115	0.995914	0.887978
Platypus	FreeBayes	SNVer	SAMtools	NA	NA	NA	NA	0.780608	0.994764	0.87477
Platypus	FreeBayes	SNVer	VarDict	NA	NA	NA	NA	0.842235	0.991296	0.910706
Platypus	FreeBayes	SAMtools	VarDict	NA	NA	NA	NA	0.808546	0.995951	0.892517
Platypus	SNVer	SAMtools	VarDict	NA	NA	NA	NA	0.766639	0.995731	0.866295
VarScan	LoFreq	FreeBayes	SNVer	NA	NA	NA	NA	0.788825	0.995851	0.88033
VarScan	LoFreq	FreeBayes	SAMtools	NA	NA	NA	NA	0.788825	0.995851	0.88033
VarScan	LoFreq	FreeBayes	VarDict	NA	NA	NA	NA	0.824158	0.997018	0.902384
VarScan	LoFreq	SNVer	SAMtools	NA	NA	NA	NA	0.745275	0.996703	0.852844
VarScan	LoFreq	SNVer	VarDict	NA	NA	NA	NA	0.7765	0.996835	0.872979
VarScan	LoFreq	SAMtools	VarDict	NA	NA	NA	NA	0.774035	0.996825	0.871415
VarScan	FreeBayes	SNVer	SAMtools	NA	NA	NA	NA	0.746919	0.996711	0.853922
VarScan	FreeBayes	SNVer	VarDict	NA	NA	NA	NA	0.777321	0.996839	0.8735
VarScan	FreeBayes	SAMtools	VarDict	NA	NA	NA	NA	0.775678	0.996832	0.872458
VarScan	SNVer	SAMtools	VarDict	NA	NA	NA	NA	0.734593	0.996656	0.84579
LoFreq	FreeBayes	SNVer	SAMtools	NA	NA	NA	NA	0.774035	0.99472	0.87061
LoFreq	FreeBayes	SNVer	VarDict	NA	NA	NA	NA	0.874281	0.972578	0.920814
LoFreq	FreeBayes	SAMtools	VarDict	NA	NA	NA	NA	0.80115	0.995914	0.887978
LoFreq	SNVer	SAMtools	VarDict	NA	NA	NA	NA	0.760066	0.995694	0.862069
FreeBayes	SNVer	SAMtools	VarDict	NA	NA	NA	NA	0.766639	0.995731	0.866295
GATK	Platypus	VarScan	LoFreq	FreeBayes	NA	NA	NA	0.837305	0.995117	0.909415
GATK	Platypus	VarScan	LoFreq	SNVer	NA	NA	NA	0.788003	0.995846	0.879817
GATK	Platypus	VarScan	LoFreq	SAMtools	NA	NA	NA	0.78636	0.996875	0.879192
GATK	Platypus	VarScan	LoFreq	VarDict	NA	NA	NA	0.821693	0.997009	0.900901
GATK	Platypus	VarScan	FreeBayes	SNVer	NA	NA	NA	0.788825	0.995851	0.88033
GATK	Platypus	VarScan	FreeBayes	SAMtools	NA	NA	NA	0.788003	0.993782	0.87901
GATK	Platypus	VarScan	FreeBayes	VarDict	NA	NA	NA	0.822514	0.997012	0.901396
GATK	Platypus	VarScan	SNVer	SAMtools	NA	NA	NA	0.745275	0.996703	0.852844
GATK	Platypus	VarScan	SNVer	VarDict	NA	NA	NA	0.7765	0.996835	0.872979
GATK	Platypus	VarScan	SAMtools	VarDict	NA	NA	NA	0.773213	0.996822	0.870893
GATK	Platypus	LoFreq	FreeBayes	SNVer	NA	NA	NA	0.847165	0.991346	0.913602
GATK	Platypus	LoFreq	FreeBayes	SAMtools	NA	NA	NA	0.815119	0.995984	0.896521
GATK	Platypus	LoFreq	FreeBayes	VarDict	NA	NA	NA	0.882498	0.993525	0.934726	best 5tool combination of both training sets
GATK	Platypus	LoFreq	SNVer	SAMtools	NA	NA	NA	0.772391	0.995763	0.869968
GATK	Platypus	LoFreq	SNVer	VarDict	NA	NA	NA	0.827445	0.993097	0.902734
GATK	Platypus	LoFreq	SAMtools	VarDict	NA	NA	NA	0.798685	0.995902	0.886457
GATK	Platypus	FreeBayes	SNVer	SAMtools	NA	NA	NA	0.778965	0.995798	0.874136
GATK	Platypus	FreeBayes	SNVer	VarDict	NA	NA	NA	0.83484	0.993157	0.907143
GATK	Platypus	FreeBayes	SAMtools	VarDict	NA	NA	NA	0.806081	0.995939	0.891008
GATK	Platypus	SNVer	SAMtools	VarDict	NA	NA	NA	0.764996	0.995722	0.865242
GATK	VarScan	LoFreq	FreeBayes	SNVer	NA	NA	NA	0.787182	0.995842	0.879302
GATK	VarScan	LoFreq	FreeBayes	SAMtools	NA	NA	NA	0.78636	0.996875	0.879192
GATK	VarScan	LoFreq	FreeBayes	VarDict	NA	NA	NA	0.820871	0.997006	0.900406
GATK	VarScan	LoFreq	SNVer	SAMtools	NA	NA	NA	0.743632	0.996696	0.851765
GATK	VarScan	LoFreq	SNVer	VarDict	NA	NA	NA	0.774856	0.996829	0.871937
GATK	VarScan	LoFreq	SAMtools	VarDict	NA	NA	NA	0.771569	0.996815	0.869847
GATK	VarScan	FreeBayes	SNVer	SAMtools	NA	NA	NA	0.745275	0.996703	0.852844
GATK	VarScan	FreeBayes	SNVer	VarDict	NA	NA	NA	0.775678	0.996832	0.872458
GATK	VarScan	FreeBayes	SAMtools	VarDict	NA	NA	NA	0.773213	0.996822	0.870893
GATK	VarScan	SNVer	SAMtools	VarDict	NA	NA	NA	0.73295	0.996648	0.844697
GATK	LoFreq	FreeBayes	SNVer	SAMtools	NA	NA	NA	0.772391	0.995763	0.869968
GATK	LoFreq	FreeBayes	SNVer	VarDict	NA	NA	NA	0.828266	0.992126	0.902821
GATK	LoFreq	FreeBayes	SAMtools	VarDict	NA	NA	NA	0.798685	0.995902	0.886457
GATK	LoFreq	SNVer	SAMtools	VarDict	NA	NA	NA	0.758422	0.995685	0.861007
GATK	FreeBayes	SNVer	SAMtools	VarDict	NA	NA	NA	0.764996	0.995722	0.865242
Platypus	VarScan	LoFreq	FreeBayes	SNVer	NA	NA	NA	0.788825	0.995851	0.88033
Platypus	VarScan	LoFreq	FreeBayes	SAMtools	NA	NA	NA	0.788825	0.996885	0.880734
Platypus	VarScan	LoFreq	FreeBayes	VarDict	NA	NA	NA	0.824158	0.997018	0.902384
Platypus	VarScan	LoFreq	SNVer	SAMtools	NA	NA	NA	0.745275	0.996703	0.852844
Platypus	VarScan	LoFreq	SNVer	VarDict	NA	NA	NA	0.7765	0.996835	0.872979
Platypus	VarScan	LoFreq	SAMtools	VarDict	NA	NA	NA	0.774035	0.996825	0.871415
Platypus	VarScan	FreeBayes	SNVer	SAMtools	NA	NA	NA	0.746919	0.996711	0.853922
Platypus	VarScan	FreeBayes	SNVer	VarDict	NA	NA	NA	0.777321	0.996839	0.8735
Platypus	VarScan	FreeBayes	SAMtools	VarDict	NA	NA	NA	0.775678	0.996832	0.872458
Platypus	VarScan	SNVer	SAMtools	VarDict	NA	NA	NA	0.734593	0.996656	0.84579
Platypus	LoFreq	FreeBayes	SNVer	SAMtools	NA	NA	NA	0.774035	0.99472	0.87061
Platypus	LoFreq	FreeBayes	SNVer	VarDict	NA	NA	NA	0.833196	0.991202	0.905357
Platypus	LoFreq	FreeBayes	SAMtools	VarDict	NA	NA	NA	0.80115	0.995914	0.887978
Platypus	LoFreq	SNVer	SAMtools	VarDict	NA	NA	NA	0.760066	0.995694	0.862069
Platypus	FreeBayes	SNVer	SAMtools	VarDict	NA	NA	NA	0.766639	0.995731	0.866295
VarScan	LoFreq	FreeBayes	SNVer	SAMtools	NA	NA	NA	0.745275	0.996703	0.852844
VarScan	LoFreq	FreeBayes	SNVer	VarDict	NA	NA	NA	0.775678	0.996832	0.872458
VarScan	LoFreq	FreeBayes	SAMtools	VarDict	NA	NA	NA	0.774035	0.996825	0.871415
VarScan	LoFreq	SNVer	SAMtools	VarDict	NA	NA	NA	0.73295	0.996648	0.844697
VarScan	FreeBayes	SNVer	SAMtools	VarDict	NA	NA	NA	0.734593	0.996656	0.84579
LoFreq	FreeBayes	SNVer	SAMtools	VarDict	NA	NA	NA	0.760066	0.995694	0.862069
GATK	Platypus	VarScan	LoFreq	FreeBayes	SNVer	NA	NA	0.787182	0.995842	0.879302
GATK	Platypus	VarScan	LoFreq	FreeBayes	SAMtools	NA	NA	0.78636	0.996875	0.879192
GATK	Platypus	VarScan	LoFreq	FreeBayes	VarDict	NA	NA	0.820871	0.997006	0.900406
GATK	Platypus	VarScan	LoFreq	SNVer	SAMtools	NA	NA	0.743632	0.996696	0.851765
GATK	Platypus	VarScan	LoFreq	SNVer	VarDict	NA	NA	0.774856	0.996829	0.871937
GATK	Platypus	VarScan	LoFreq	SAMtools	VarDict	NA	NA	0.771569	0.996815	0.869847
GATK	Platypus	VarScan	FreeBayes	SNVer	SAMtools	NA	NA	0.745275	0.996703	0.852844
GATK	Platypus	VarScan	FreeBayes	SNVer	VarDict	NA	NA	0.775678	0.996832	0.872458
GATK	Platypus	VarScan	FreeBayes	SAMtools	VarDict	NA	NA	0.773213	0.996822	0.870893
GATK	Platypus	VarScan	SNVer	SAMtools	VarDict	NA	NA	0.73295	0.996648	0.844697
GATK	Platypus	LoFreq	FreeBayes	SNVer	SAMtools	NA	NA	0.772391	0.995763	0.869968
GATK	Platypus	LoFreq	FreeBayes	SNVer	VarDict	NA	NA	0.826623	0.99309	0.902242
GATK	Platypus	LoFreq	FreeBayes	SAMtools	VarDict	NA	NA	0.798685	0.995902	0.886457	best 6tool combination of both training sets
GATK	Platypus	LoFreq	SNVer	SAMtools	VarDict	NA	NA	0.758422	0.995685	0.861007
GATK	Platypus	FreeBayes	SNVer	SAMtools	VarDict	NA	NA	0.764996	0.995722	0.865242
GATK	VarScan	LoFreq	FreeBayes	SNVer	SAMtools	NA	NA	0.743632	0.996696	0.851765
GATK	VarScan	LoFreq	FreeBayes	SNVer	VarDict	NA	NA	0.774035	0.996825	0.871415
GATK	VarScan	LoFreq	FreeBayes	SAMtools	VarDict	NA	NA	0.771569	0.996815	0.869847
GATK	VarScan	LoFreq	SNVer	SAMtools	VarDict	NA	NA	0.731306	0.996641	0.843602
GATK	VarScan	FreeBayes	SNVer	SAMtools	VarDict	NA	NA	0.73295	0.996648	0.844697
GATK	LoFreq	FreeBayes	SNVer	SAMtools	VarDict	NA	NA	0.758422	0.995685	0.861007
Platypus	VarScan	LoFreq	FreeBayes	SNVer	SAMtools	NA	NA	0.745275	0.996703	0.852844
Platypus	VarScan	LoFreq	FreeBayes	SNVer	VarDict	NA	NA	0.775678	0.996832	0.872458
Platypus	VarScan	LoFreq	FreeBayes	SAMtools	VarDict	NA	NA	0.774035	0.996825	0.871415
Platypus	VarScan	LoFreq	SNVer	SAMtools	VarDict	NA	NA	0.73295	0.996648	0.844697
Platypus	VarScan	FreeBayes	SNVer	SAMtools	VarDict	NA	NA	0.734593	0.996656	0.84579
Platypus	LoFreq	FreeBayes	SNVer	SAMtools	VarDict	NA	NA	0.760066	0.995694	0.862069
VarScan	LoFreq	FreeBayes	SNVer	SAMtools	VarDict	NA	NA	0.73295	0.996648	0.844697
GATK	Platypus	VarScan	LoFreq	FreeBayes	SNVer	SAMtools	NA	0.743632	0.996696	0.851765
GATK	Platypus	VarScan	LoFreq	FreeBayes	SNVer	VarDict	NA	0.774035	0.996825	0.871415
GATK	Platypus	VarScan	LoFreq	FreeBayes	SAMtools	VarDict	NA	0.771569	0.996815	0.869847	best 7tool combination of both training sets
GATK	Platypus	VarScan	LoFreq	SNVer	SAMtools	VarDict	NA	0.731306	0.996641	0.843602
GATK	Platypus	VarScan	FreeBayes	SNVer	SAMtools	VarDict	NA	0.73295	0.996648	0.844697
GATK	Platypus	LoFreq	FreeBayes	SNVer	SAMtools	VarDict	NA	0.758422	0.995685	0.861007
GATK	VarScan	LoFreq	FreeBayes	SNVer	SAMtools	VarDict	NA	0.731306	0.996641	0.843602
Platypus	VarScan	LoFreq	FreeBayes	SNVer	SAMtools	VarDict	NA	0.73295	0.996648	0.844697
GATK	Platypus	VarScan	LoFreq	FreeBayes	SNVer	SAMtools	VarDict	0.731306	0.996641	0.843602	8 tools

## Sheet: Test 2
Caller 1	Caller 2	Caller 3	Caller 4	Caller 5	Caller 6	Caller 7	Caller 8	Sensitivity	PPV	F1
GATK	NA	NA	NA	NA	NA	NA	NA	0.899194	0.728758	0.805054	best single tool of both training sets
Platypus	NA	NA	NA	NA	NA	NA	NA	0.931452	0.825	0.875
VarScan	NA	NA	NA	NA	NA	NA	NA	0.818548	0.730216	0.771863
LoFreq	NA	NA	NA	NA	NA	NA	NA	0.983871	0.707246	0.822934
FreeBayes	NA	NA	NA	NA	NA	NA	NA	0.995968	0.0109336	0.0216297
SNVer	NA	NA	NA	NA	NA	NA	NA	0.939516	0.811847	0.871028
SAMtools	NA	NA	NA	NA	NA	NA	NA	0.810484	0.752809	0.780583
VarDict	NA	NA	NA	NA	NA	NA	NA	0.987903	0.299511	0.459662	best solution training set 1
GATK	Platypus	NA	NA	NA	NA	NA	NA	0.891129	1	0.942431
GATK	VarScan	NA	NA	NA	NA	NA	NA	0.814516	0.87069	0.841667
GATK	LoFreq	NA	NA	NA	NA	NA	NA	0.891129	0.952586	0.920833
GATK	FreeBayes	NA	NA	NA	NA	NA	NA	0.895161	0.730263	0.804348
GATK	SNVer	NA	NA	NA	NA	NA	NA	0.846774	0.990566	0.913043
GATK	SAMtools	NA	NA	NA	NA	NA	NA	0.806452	0.995025	0.890869
GATK	VarDict	NA	NA	NA	NA	NA	NA	0.891129	0.995495	0.940426
Platypus	VarScan	NA	NA	NA	NA	NA	NA	0.818548	0.821862	0.820202
Platypus	LoFreq	NA	NA	NA	NA	NA	NA	0.923387	0.970339	0.946281
Platypus	FreeBayes	NA	NA	NA	NA	NA	NA	0.927419	0.839416	0.881226
Platypus	SNVer	NA	NA	NA	NA	NA	NA	0.870968	0.977376	0.921109
Platypus	SAMtools	NA	NA	NA	NA	NA	NA	0.810484	0.820408	0.815416
Platypus	VarDict	NA	NA	NA	NA	NA	NA	0.923387	0.991342	0.956159	best combination of both training sets
VarScan	LoFreq	NA	NA	NA	NA	NA	NA	0.810484	0.975728	0.885463
VarScan	FreeBayes	NA	NA	NA	NA	NA	NA	0.814516	0.731884	0.770992
VarScan	SNVer	NA	NA	NA	NA	NA	NA	0.774194	0.989691	0.868778
VarScan	SAMtools	NA	NA	NA	NA	NA	NA	0.774194	0.813559	0.793388
VarScan	VarDict	NA	NA	NA	NA	NA	NA	0.810484	1	0.895323
LoFreq	FreeBayes	NA	NA	NA	NA	NA	NA	0.979839	0.718935	0.829352
LoFreq	SNVer	NA	NA	NA	NA	NA	NA	0.923387	0.958159	0.940452
LoFreq	SAMtools	NA	NA	NA	NA	NA	NA	0.802419	0.985149	0.884444
LoFreq	VarDict	NA	NA	NA	NA	NA	NA	0.975806	0.812081	0.886447
FreeBayes	SNVer	NA	NA	NA	NA	NA	NA	0.939516	0.826241	0.879245
FreeBayes	SAMtools	NA	NA	NA	NA	NA	NA	0.806452	0.75188	0.77821
FreeBayes	VarDict	NA	NA	NA	NA	NA	NA	0.983871	0.301607	0.461684
SNVer	SAMtools	NA	NA	NA	NA	NA	NA	0.774194	0.984615	0.866817
SNVer	VarDict	NA	NA	NA	NA	NA	NA	0.927419	0.970464	0.948454
SAMtools	VarDict	NA	NA	NA	NA	NA	NA	0.802419	0.995	0.888393
GATK	Platypus	VarScan	NA	NA	NA	NA	NA	0.814516	1	0.897778
GATK	Platypus	LoFreq	NA	NA	NA	NA	NA	0.883065	1	0.937901
GATK	Platypus	FreeBayes	NA	NA	NA	NA	NA	0.887097	1	0.940171
GATK	Platypus	SNVer	NA	NA	NA	NA	NA	0.83871	1	0.912281
GATK	Platypus	SAMtools	NA	NA	NA	NA	NA	0.806452	1	0.892857
GATK	Platypus	VarDict	NA	NA	NA	NA	NA	0.883065	1	0.937901
GATK	VarScan	LoFreq	NA	NA	NA	NA	NA	0.806452	0.985222	0.886918
GATK	VarScan	FreeBayes	NA	NA	NA	NA	NA	0.810484	0.87013	0.839248
GATK	VarScan	SNVer	NA	NA	NA	NA	NA	0.770161	1	0.870159
GATK	VarScan	SAMtools	NA	NA	NA	NA	NA	0.774194	1	0.872727
GATK	VarScan	VarDict	NA	NA	NA	NA	NA	0.806452	1	0.892857
GATK	LoFreq	FreeBayes	NA	NA	NA	NA	NA	0.887097	0.956522	0.920502
GATK	LoFreq	SNVer	NA	NA	NA	NA	NA	0.83871	0.990476	0.908297
GATK	LoFreq	SAMtools	NA	NA	NA	NA	NA	0.798387	0.994975	0.885906
GATK	LoFreq	VarDict	NA	NA	NA	NA	NA	0.883065	0.995455	0.935897
GATK	FreeBayes	SNVer	NA	NA	NA	NA	NA	0.846774	0.995261	0.915033
GATK	FreeBayes	SAMtools	NA	NA	NA	NA	NA	0.802419	0.995	0.888393
GATK	FreeBayes	VarDict	NA	NA	NA	NA	NA	0.887097	0.995475	0.938166
GATK	SNVer	SAMtools	NA	NA	NA	NA	NA	0.770161	0.994792	0.868182
GATK	SNVer	VarDict	NA	NA	NA	NA	NA	0.83871	0.995215	0.910284
GATK	SAMtools	VarDict	NA	NA	NA	NA	NA	0.798387	0.994975	0.885906
Platypus	VarScan	LoFreq	NA	NA	NA	NA	NA	0.810484	0.990148	0.891353
Platypus	VarScan	FreeBayes	NA	NA	NA	NA	NA	0.814516	0.821138	0.817814
Platypus	VarScan	SNVer	NA	NA	NA	NA	NA	0.774194	0.989691	0.868778
Platypus	VarScan	SAMtools	NA	NA	NA	NA	NA	0.774194	0.813559	0.793388
Platypus	VarScan	VarDict	NA	NA	NA	NA	NA	0.810484	1	0.895323
Platypus	LoFreq	FreeBayes	NA	NA	NA	NA	NA	0.919355	0.991304	0.953975
Platypus	LoFreq	SNVer	NA	NA	NA	NA	NA	0.862903	0.977169	0.916488
Platypus	LoFreq	SAMtools	NA	NA	NA	NA	NA	0.802419	0.99005	0.886414
Platypus	LoFreq	VarDict	NA	NA	NA	NA	NA	0.915323	0.991266	0.951782
Platypus	FreeBayes	SNVer	NA	NA	NA	NA	NA	0.870968	0.990826	0.927039
Platypus	FreeBayes	SAMtools	NA	NA	NA	NA	NA	0.806452	0.819672	0.813008
Platypus	FreeBayes	VarDict	NA	NA	NA	NA	NA	0.919355	1	0.957983	best 3tool combination of both training sets	best solution training set 2
Platypus	SNVer	SAMtools	NA	NA	NA	NA	NA	0.774194	0.989691	0.868778
Platypus	SNVer	VarDict	NA	NA	NA	NA	NA	0.862903	1	0.926407
Platypus	SAMtools	VarDict	NA	NA	NA	NA	NA	0.802419	1	0.89038
VarScan	LoFreq	FreeBayes	NA	NA	NA	NA	NA	0.806452	0.97561	0.883002
VarScan	LoFreq	SNVer	NA	NA	NA	NA	NA	0.766129	0.989583	0.863636
VarScan	LoFreq	SAMtools	NA	NA	NA	NA	NA	0.766129	0.989583	0.863636
VarScan	LoFreq	VarDict	NA	NA	NA	NA	NA	0.802419	1	0.89038
VarScan	FreeBayes	SNVer	NA	NA	NA	NA	NA	0.774194	0.989691	0.868778
VarScan	FreeBayes	SAMtools	NA	NA	NA	NA	NA	0.770161	0.812766	0.79089
VarScan	FreeBayes	VarDict	NA	NA	NA	NA	NA	0.806452	1	0.892857
VarScan	SNVer	SAMtools	NA	NA	NA	NA	NA	0.737903	0.989189	0.845266
VarScan	SNVer	VarDict	NA	NA	NA	NA	NA	0.766129	1	0.86758
VarScan	SAMtools	VarDict	NA	NA	NA	NA	NA	0.766129	1	0.86758
LoFreq	FreeBayes	SNVer	NA	NA	NA	NA	NA	0.923387	0.974468	0.94824
LoFreq	FreeBayes	SAMtools	NA	NA	NA	NA	NA	0.798387	0.985075	0.88196
LoFreq	FreeBayes	VarDict	NA	NA	NA	NA	NA	0.971774	0.816949	0.887661
LoFreq	SNVer	SAMtools	NA	NA	NA	NA	NA	0.766129	0.984456	0.861678
LoFreq	SNVer	VarDict	NA	NA	NA	NA	NA	0.915323	0.991266	0.951782
LoFreq	SAMtools	VarDict	NA	NA	NA	NA	NA	0.794355	0.994949	0.883408
FreeBayes	SNVer	SAMtools	NA	NA	NA	NA	NA	0.774194	0.984615	0.866817
FreeBayes	SNVer	VarDict	NA	NA	NA	NA	NA	0.927419	0.974576	0.950413
FreeBayes	SAMtools	VarDict	NA	NA	NA	NA	NA	0.798387	0.994975	0.885906
SNVer	SAMtools	VarDict	NA	NA	NA	NA	NA	0.766129	0.994764	0.865604
GATK	Platypus	VarScan	LoFreq	NA	NA	NA	NA	0.806452	1	0.892857
GATK	Platypus	VarScan	FreeBayes	NA	NA	NA	NA	0.810484	1	0.895323
GATK	Platypus	VarScan	SNVer	NA	NA	NA	NA	0.770161	1	0.870159
GATK	Platypus	VarScan	SAMtools	NA	NA	NA	NA	0.774194	1	0.872727
GATK	Platypus	VarScan	VarDict	NA	NA	NA	NA	0.806452	1	0.892857
GATK	Platypus	LoFreq	FreeBayes	NA	NA	NA	NA	0.879032	1	0.935622
GATK	Platypus	LoFreq	SNVer	NA	NA	NA	NA	0.830645	1	0.907489
GATK	Platypus	LoFreq	SAMtools	NA	NA	NA	NA	0.798387	1	0.887892
GATK	Platypus	LoFreq	VarDict	NA	NA	NA	NA	0.875	1	0.933333
GATK	Platypus	FreeBayes	SNVer	NA	NA	NA	NA	0.83871	1	0.912281
GATK	Platypus	FreeBayes	SAMtools	NA	NA	NA	NA	0.802419	1	0.89038
GATK	Platypus	FreeBayes	VarDict	NA	NA	NA	NA	0.879032	1	0.935622	best 4tool combination of both training sets
GATK	Platypus	SNVer	SAMtools	NA	NA	NA	NA	0.770161	1	0.870159
GATK	Platypus	SNVer	VarDict	NA	NA	NA	NA	0.830645	1	0.907489
GATK	Platypus	SAMtools	VarDict	NA	NA	NA	NA	0.798387	1	0.887892
GATK	VarScan	LoFreq	FreeBayes	NA	NA	NA	NA	0.802419	0.985149	0.884444
GATK	VarScan	LoFreq	SNVer	NA	NA	NA	NA	0.762097	1	0.864989
GATK	VarScan	LoFreq	SAMtools	NA	NA	NA	NA	0.766129	1	0.86758
GATK	VarScan	LoFreq	VarDict	NA	NA	NA	NA	0.798387	1	0.887892
GATK	VarScan	FreeBayes	SNVer	NA	NA	NA	NA	0.770161	1	0.870159
GATK	VarScan	FreeBayes	SAMtools	NA	NA	NA	NA	0.770161	1	0.870159
GATK	VarScan	FreeBayes	VarDict	NA	NA	NA	NA	0.802419	1	0.89038
GATK	VarScan	SNVer	SAMtools	NA	NA	NA	NA	0.737903	1	0.849188
GATK	VarScan	SNVer	VarDict	NA	NA	NA	NA	0.762097	1	0.864989
GATK	VarScan	SAMtools	VarDict	NA	NA	NA	NA	0.766129	1	0.86758
GATK	LoFreq	FreeBayes	SNVer	NA	NA	NA	NA	0.83871	0.995215	0.910284
GATK	LoFreq	FreeBayes	SAMtools	NA	NA	NA	NA	0.794355	0.994949	0.883408
GATK	LoFreq	FreeBayes	VarDict	NA	NA	NA	NA	0.879032	0.995434	0.933619
GATK	LoFreq	SNVer	SAMtools	NA	NA	NA	NA	0.762097	0.994737	0.863014
GATK	LoFreq	SNVer	VarDict	NA	NA	NA	NA	0.830645	0.995169	0.905495
GATK	LoFreq	SAMtools	VarDict	NA	NA	NA	NA	0.790323	0.994924	0.880899
GATK	FreeBayes	SNVer	SAMtools	NA	NA	NA	NA	0.770161	0.994792	0.868182
GATK	FreeBayes	SNVer	VarDict	NA	NA	NA	NA	0.83871	0.995215	0.910284
GATK	FreeBayes	SAMtools	VarDict	NA	NA	NA	NA	0.794355	0.994949	0.883408
GATK	SNVer	SAMtools	VarDict	NA	NA	NA	NA	0.762097	0.994737	0.863014
Platypus	VarScan	LoFreq	FreeBayes	NA	NA	NA	NA	0.806452	0.990099	0.888889
Platypus	VarScan	LoFreq	SNVer	NA	NA	NA	NA	0.766129	0.989583	0.863636
Platypus	VarScan	LoFreq	SAMtools	NA	NA	NA	NA	0.766129	0.989583	0.863636
Platypus	VarScan	LoFreq	VarDict	NA	NA	NA	NA	0.802419	1	0.89038
Platypus	VarScan	FreeBayes	SNVer	NA	NA	NA	NA	0.774194	0.989691	0.868778
Platypus	VarScan	FreeBayes	SAMtools	NA	NA	NA	NA	0.770161	0.812766	0.79089
Platypus	VarScan	FreeBayes	VarDict	NA	NA	NA	NA	0.806452	1	0.892857
Platypus	VarScan	SNVer	SAMtools	NA	NA	NA	NA	0.737903	0.989189	0.845266
Platypus	VarScan	SNVer	VarDict	NA	NA	NA	NA	0.766129	1	0.86758
Platypus	VarScan	SAMtools	VarDict	NA	NA	NA	NA	0.766129	1	0.86758
Platypus	LoFreq	FreeBayes	SNVer	NA	NA	NA	NA	0.862903	0.990741	0.922414
Platypus	LoFreq	FreeBayes	SAMtools	NA	NA	NA	NA	0.798387	0.99	0.883929
Platypus	LoFreq	FreeBayes	VarDict	NA	NA	NA	NA	0.91129	1	0.953586
Platypus	LoFreq	SNVer	SAMtools	NA	NA	NA	NA	0.766129	0.989583	0.863636
Platypus	LoFreq	SNVer	VarDict	NA	NA	NA	NA	0.854839	1	0.921739
Platypus	LoFreq	SAMtools	VarDict	NA	NA	NA	NA	0.794355	1	0.885393
Platypus	FreeBayes	SNVer	SAMtools	NA	NA	NA	NA	0.774194	0.989691	0.868778
Platypus	FreeBayes	SNVer	VarDict	NA	NA	NA	NA	0.862903	1	0.926407
Platypus	FreeBayes	SAMtools	VarDict	NA	NA	NA	NA	0.798387	1	0.887892
Platypus	SNVer	SAMtools	VarDict	NA	NA	NA	NA	0.766129	1	0.86758
VarScan	LoFreq	FreeBayes	SNVer	NA	NA	NA	NA	0.766129	0.989583	0.863636
VarScan	LoFreq	FreeBayes	SAMtools	NA	NA	NA	NA	0.762097	0.989529	0.861048
VarScan	LoFreq	FreeBayes	VarDict	NA	NA	NA	NA	0.798387	1	0.887892
VarScan	LoFreq	SNVer	SAMtools	NA	NA	NA	NA	0.729839	0.989071	0.839907
VarScan	LoFreq	SNVer	VarDict	NA	NA	NA	NA	0.758065	1	0.862385
VarScan	LoFreq	SAMtools	VarDict	NA	NA	NA	NA	0.758065	1	0.862385
VarScan	FreeBayes	SNVer	SAMtools	NA	NA	NA	NA	0.737903	0.989189	0.845266
VarScan	FreeBayes	SNVer	VarDict	NA	NA	NA	NA	0.766129	1	0.86758
VarScan	FreeBayes	SAMtools	VarDict	NA	NA	NA	NA	0.762097	1	0.864989
VarScan	SNVer	SAMtools	VarDict	NA	NA	NA	NA	0.729839	1	0.843823
LoFreq	FreeBayes	SNVer	SAMtools	NA	NA	NA	NA	0.766129	0.984456	0.861678
LoFreq	FreeBayes	SNVer	VarDict	NA	NA	NA	NA	0.915323	0.991266	0.951782
LoFreq	FreeBayes	SAMtools	VarDict	NA	NA	NA	NA	0.790323	0.994924	0.880899
LoFreq	SNVer	SAMtools	VarDict	NA	NA	NA	NA	0.758065	0.994709	0.860412
FreeBayes	SNVer	SAMtools	VarDict	NA	NA	NA	NA	0.766129	0.994764	0.865604
GATK	Platypus	VarScan	LoFreq	FreeBayes	NA	NA	NA	0.802419	1	0.89038
GATK	Platypus	VarScan	LoFreq	SNVer	NA	NA	NA	0.762097	1	0.864989
GATK	Platypus	VarScan	LoFreq	SAMtools	NA	NA	NA	0.766129	1	0.86758
GATK	Platypus	VarScan	LoFreq	VarDict	NA	NA	NA	0.798387	1	0.887892
GATK	Platypus	VarScan	FreeBayes	SNVer	NA	NA	NA	0.770161	1	0.870159
GATK	Platypus	VarScan	FreeBayes	SAMtools	NA	NA	NA	0.770161	1	0.870159
GATK	Platypus	VarScan	FreeBayes	VarDict	NA	NA	NA	0.802419	1	0.89038
GATK	Platypus	VarScan	SNVer	SAMtools	NA	NA	NA	0.737903	1	0.849188
GATK	Platypus	VarScan	SNVer	VarDict	NA	NA	NA	0.762097	1	0.864989
GATK	Platypus	VarScan	SAMtools	VarDict	NA	NA	NA	0.766129	1	0.86758
GATK	Platypus	LoFreq	FreeBayes	SNVer	NA	NA	NA	0.830645	1	0.907489
GATK	Platypus	LoFreq	FreeBayes	SAMtools	NA	NA	NA	0.794355	1	0.885393
GATK	Platypus	LoFreq	FreeBayes	VarDict	NA	NA	NA	0.870968	1	0.931034	best 5tool combination of both training sets
GATK	Platypus	LoFreq	SNVer	SAMtools	NA	NA	NA	0.762097	1	0.864989
GATK	Platypus	LoFreq	SNVer	VarDict	NA	NA	NA	0.822581	1	0.902655
GATK	Platypus	LoFreq	SAMtools	VarDict	NA	NA	NA	0.790323	1	0.882883
GATK	Platypus	FreeBayes	SNVer	SAMtools	NA	NA	NA	0.770161	1	0.870159
GATK	Platypus	FreeBayes	SNVer	VarDict	NA	NA	NA	0.830645	1	0.907489
GATK	Platypus	FreeBayes	SAMtools	VarDict	NA	NA	NA	0.794355	1	0.885393
GATK	Platypus	SNVer	SAMtools	VarDict	NA	NA	NA	0.762097	1	0.864989
GATK	VarScan	LoFreq	FreeBayes	SNVer	NA	NA	NA	0.762097	1	0.864989
GATK	VarScan	LoFreq	FreeBayes	SAMtools	NA	NA	NA	0.762097	1	0.864989
GATK	VarScan	LoFreq	FreeBayes	VarDict	NA	NA	NA	0.794355	1	0.885393
GATK	VarScan	LoFreq	SNVer	SAMtools	NA	NA	NA	0.729839	1	0.843823
GATK	VarScan	LoFreq	SNVer	VarDict	NA	NA	NA	0.754032	1	0.85977
GATK	VarScan	LoFreq	SAMtools	VarDict	NA	NA	NA	0.758065	1	0.862385
GATK	VarScan	FreeBayes	SNVer	SAMtools	NA	NA	NA	0.737903	1	0.849188
GATK	VarScan	FreeBayes	SNVer	VarDict	NA	NA	NA	0.762097	1	0.864989
GATK	VarScan	FreeBayes	SAMtools	VarDict	NA	NA	NA	0.762097	1	0.864989
GATK	VarScan	SNVer	SAMtools	VarDict	NA	NA	NA	0.729839	1	0.843823
GATK	LoFreq	FreeBayes	SNVer	SAMtools	NA	NA	NA	0.762097	0.994737	0.863014
GATK	LoFreq	FreeBayes	SNVer	VarDict	NA	NA	NA	0.830645	0.995169	0.905495
GATK	LoFreq	FreeBayes	SAMtools	VarDict	NA	NA	NA	0.78629	0.994898	0.878378
GATK	LoFreq	SNVer	SAMtools	VarDict	NA	NA	NA	0.754032	0.994681	0.857798
GATK	FreeBayes	SNVer	SAMtools	VarDict	NA	NA	NA	0.762097	0.994737	0.863014
Platypus	VarScan	LoFreq	FreeBayes	SNVer	NA	NA	NA	0.766129	0.989583	0.863636
Platypus	VarScan	LoFreq	FreeBayes	SAMtools	NA	NA	NA	0.762097	0.989529	0.861048
Platypus	VarScan	LoFreq	FreeBayes	VarDict	NA	NA	NA	0.798387	1	0.887892
Platypus	VarScan	LoFreq	SNVer	SAMtools	NA	NA	NA	0.729839	0.989071	0.839907
Platypus	VarScan	LoFreq	SNVer	VarDict	NA	NA	NA	0.758065	1	0.862385
Platypus	VarScan	LoFreq	SAMtools	VarDict	NA	NA	NA	0.758065	1	0.862385
Platypus	VarScan	FreeBayes	SNVer	SAMtools	NA	NA	NA	0.737903	0.989189	0.845266
Platypus	VarScan	FreeBayes	SNVer	VarDict	NA	NA	NA	0.766129	1	0.86758
Platypus	VarScan	FreeBayes	SAMtools	VarDict	NA	NA	NA	0.762097	1	0.864989
Platypus	VarScan	SNVer	SAMtools	VarDict	NA	NA	NA	0.729839	1	0.843823
Platypus	LoFreq	FreeBayes	SNVer	SAMtools	NA	NA	NA	0.766129	0.989583	0.863636
Platypus	LoFreq	FreeBayes	SNVer	VarDict	NA	NA	NA	0.854839	1	0.921739
Platypus	LoFreq	FreeBayes	SAMtools	VarDict	NA	NA	NA	0.790323	1	0.882883
Platypus	LoFreq	SNVer	SAMtools	VarDict	NA	NA	NA	0.758065	1	0.862385
Platypus	FreeBayes	SNVer	SAMtools	VarDict	NA	NA	NA	0.766129	1	0.86758
VarScan	LoFreq	FreeBayes	SNVer	SAMtools	NA	NA	NA	0.729839	0.989071	0.839907
VarScan	LoFreq	FreeBayes	SNVer	VarDict	NA	NA	NA	0.758065	1	0.862385
VarScan	LoFreq	FreeBayes	SAMtools	VarDict	NA	NA	NA	0.754032	1	0.85977
VarScan	LoFreq	SNVer	SAMtools	VarDict	NA	NA	NA	0.721774	1	0.838407
VarScan	FreeBayes	SNVer	SAMtools	VarDict	NA	NA	NA	0.729839	1	0.843823
LoFreq	FreeBayes	SNVer	SAMtools	VarDict	NA	NA	NA	0.758065	0.994709	0.860412
GATK	Platypus	VarScan	LoFreq	FreeBayes	SNVer	NA	NA	0.762097	1	0.864989
GATK	Platypus	VarScan	LoFreq	FreeBayes	SAMtools	NA	NA	0.762097	1	0.864989
GATK	Platypus	VarScan	LoFreq	FreeBayes	VarDict	NA	NA	0.794355	1	0.885393
GATK	Platypus	VarScan	LoFreq	SNVer	SAMtools	NA	NA	0.729839	1	0.843823
GATK	Platypus	VarScan	LoFreq	SNVer	VarDict	NA	NA	0.754032	1	0.85977
GATK	Platypus	VarScan	LoFreq	SAMtools	VarDict	NA	NA	0.758065	1	0.862385
GATK	Platypus	VarScan	FreeBayes	SNVer	SAMtools	NA	NA	0.737903	1	0.849188
GATK	Platypus	VarScan	FreeBayes	SNVer	VarDict	NA	NA	0.762097	1	0.864989
GATK	Platypus	VarScan	FreeBayes	SAMtools	VarDict	NA	NA	0.762097	1	0.864989
GATK	Platypus	VarScan	SNVer	SAMtools	VarDict	NA	NA	0.729839	1	0.843823
GATK	Platypus	LoFreq	FreeBayes	SNVer	SAMtools	NA	NA	0.762097	1	0.864989
GATK	Platypus	LoFreq	FreeBayes	SNVer	VarDict	NA	NA	0.822581	1	0.902655
GATK	Platypus	LoFreq	FreeBayes	SAMtools	VarDict	NA	NA	0.78629	1	0.880361	best 6tool combination of both training sets
GATK	Platypus	LoFreq	SNVer	SAMtools	VarDict	NA	NA	0.754032	1	0.85977
GATK	Platypus	FreeBayes	SNVer	SAMtools	VarDict	NA	NA	0.762097	1	0.864989
GATK	VarScan	LoFreq	FreeBayes	SNVer	SAMtools	NA	NA	0.729839	1	0.843823
GATK	VarScan	LoFreq	FreeBayes	SNVer	VarDict	NA	NA	0.754032	1	0.85977
GATK	VarScan	LoFreq	FreeBayes	SAMtools	VarDict	NA	NA	0.754032	1	0.85977
GATK	VarScan	LoFreq	SNVer	SAMtools	VarDict	NA	NA	0.721774	1	0.838407
GATK	VarScan	FreeBayes	SNVer	SAMtools	VarDict	NA	NA	0.729839	1	0.843823
GATK	LoFreq	FreeBayes	SNVer	SAMtools	VarDict	NA	NA	0.754032	0.994681	0.857798
Platypus	VarScan	LoFreq	FreeBayes	SNVer	SAMtools	NA	NA	0.729839	0.989071	0.839907
Platypus	VarScan	LoFreq	FreeBayes	SNVer	VarDict	NA	NA	0.758065	1	0.862385
Platypus	VarScan	LoFreq	FreeBayes	SAMtools	VarDict	NA	NA	0.754032	1	0.85977
Platypus	VarScan	LoFreq	SNVer	SAMtools	VarDict	NA	NA	0.721774	1	0.838407
Platypus	VarScan	FreeBayes	SNVer	SAMtools	VarDict	NA	NA	0.729839	1	0.843823
Platypus	LoFreq	FreeBayes	SNVer	SAMtools	VarDict	NA	NA	0.758065	1	0.862385
VarScan	LoFreq	FreeBayes	SNVer	SAMtools	VarDict	NA	NA	0.721774	1	0.838407
GATK	Platypus	VarScan	LoFreq	FreeBayes	SNVer	SAMtools	NA	0.729839	1	0.843823
GATK	Platypus	VarScan	LoFreq	FreeBayes	SNVer	VarDict	NA	0.754032	1	0.85977
GATK	Platypus	VarScan	LoFreq	FreeBayes	SAMtools	VarDict	NA	0.754032	1	0.85977	best 7tool combination of both training sets
GATK	Platypus	VarScan	LoFreq	SNVer	SAMtools	VarDict	NA	0.721774	1	0.838407
GATK	Platypus	VarScan	FreeBayes	SNVer	SAMtools	VarDict	NA	0.729839	1	0.843823
GATK	Platypus	LoFreq	FreeBayes	SNVer	SAMtools	VarDict	NA	0.754032	1	0.85977
GATK	VarScan	LoFreq	FreeBayes	SNVer	SAMtools	VarDict	NA	0.721774	1	0.838407
Platypus	VarScan	LoFreq	FreeBayes	SNVer	SAMtools	VarDict	NA	0.721774	1	0.838407
GATK	Platypus	VarScan	LoFreq	FreeBayes	SNVer	SAMtools	VarDict	0.721774	1	0.838407	8 tools

## Sheet: Test 3
Caller 1	Caller 2	Caller 3	Caller 4	Caller 5	Caller 6	Caller 7	Caller 8	Sensitivity	PPV	F1
GATK	NA	NA	NA	NA	NA	NA	NA	0.948718	0.30859	0.465702	best single tool of both training sets
Platypus	NA	NA	NA	NA	NA	NA	NA	0.969231	0.132958	0.233839
VarScan	NA	NA	NA	NA	NA	NA	NA	0.912821	0.512968	0.656827
LoFreq	NA	NA	NA	NA	NA	NA	NA	0.938462	0.307563	0.463291
FreeBayes	NA	NA	NA	NA	NA	NA	NA	0.994872	0.0677374	0.126839
SNVer	NA	NA	NA	NA	NA	NA	NA	0.974359	0.0986244	0.179119
SAMtools	NA	NA	NA	NA	NA	NA	NA	0.925641	0.68242	0.785637
VarDict	NA	NA	NA	NA	NA	NA	NA	0.994872	0.250161	0.399794	best solution training set 1
GATK	Platypus	NA	NA	NA	NA	NA	NA	0.938462	0.330027	0.488326
GATK	VarScan	NA	NA	NA	NA	NA	NA	0.9	0.549296	0.682216
GATK	LoFreq	NA	NA	NA	NA	NA	NA	0.9	0.948649	0.923684
GATK	FreeBayes	NA	NA	NA	NA	NA	NA	0.948718	0.460772	0.620285
GATK	SNVer	NA	NA	NA	NA	NA	NA	0.933333	0.308736	0.46399
GATK	SAMtools	NA	NA	NA	NA	NA	NA	0.910256	0.720081	0.804077
GATK	VarDict	NA	NA	NA	NA	NA	NA	0.948718	0.626058	0.754332
Platypus	VarScan	NA	NA	NA	NA	NA	NA	0.907692	0.533937	0.672365
Platypus	LoFreq	NA	NA	NA	NA	NA	NA	0.915385	0.585246	0.714
Platypus	FreeBayes	NA	NA	NA	NA	NA	NA	0.969231	0.190428	0.318316
Platypus	SNVer	NA	NA	NA	NA	NA	NA	0.951282	0.142473	0.247829
Platypus	SAMtools	NA	NA	NA	NA	NA	NA	0.917949	0.723232	0.80904
Platypus	VarDict	NA	NA	NA	NA	NA	NA	0.969231	0.499339	0.659111	best combination of both training sets
VarScan	LoFreq	NA	NA	NA	NA	NA	NA	0.876923	0.985591	0.928087
VarScan	FreeBayes	NA	NA	NA	NA	NA	NA	0.912821	0.66171	0.767241
VarScan	SNVer	NA	NA	NA	NA	NA	NA	0.902564	0.512373	0.653668
VarScan	SAMtools	NA	NA	NA	NA	NA	NA	0.902564	0.848193	0.874534
VarScan	VarDict	NA	NA	NA	NA	NA	NA	0.912821	0.751055	0.824074
LoFreq	FreeBayes	NA	NA	NA	NA	NA	NA	0.938462	0.328546	0.486702
LoFreq	SNVer	NA	NA	NA	NA	NA	NA	0.923077	0.345489	0.502793
LoFreq	SAMtools	NA	NA	NA	NA	NA	NA	0.9	0.972299	0.934754
LoFreq	VarDict	NA	NA	NA	NA	NA	NA	0.938462	0.606965	0.73716
FreeBayes	SNVer	NA	NA	NA	NA	NA	NA	0.974359	0.144432	0.251572
FreeBayes	SAMtools	NA	NA	NA	NA	NA	NA	0.925641	0.820455	0.86988
FreeBayes	VarDict	NA	NA	NA	NA	NA	NA	0.994872	0.379648	0.549575
SNVer	SAMtools	NA	NA	NA	NA	NA	NA	0.910256	0.684008	0.781078
SNVer	VarDict	NA	NA	NA	NA	NA	NA	0.974359	0.38736	0.55434
SAMtools	VarDict	NA	NA	NA	NA	NA	NA	0.925641	0.882641	0.90363
GATK	Platypus	VarScan	NA	NA	NA	NA	NA	0.894872	0.566558	0.693837
GATK	Platypus	LoFreq	NA	NA	NA	NA	NA	0.892308	0.953425	0.921854
GATK	Platypus	FreeBayes	NA	NA	NA	NA	NA	0.938462	0.47348	0.629407
GATK	Platypus	SNVer	NA	NA	NA	NA	NA	0.923077	0.329369	0.485502
GATK	Platypus	SAMtools	NA	NA	NA	NA	NA	0.905128	0.743158	0.816185
GATK	Platypus	VarDict	NA	NA	NA	NA	NA	0.938462	0.661844	0.776246
GATK	VarScan	LoFreq	NA	NA	NA	NA	NA	0.866667	0.994118	0.926027
GATK	VarScan	FreeBayes	NA	NA	NA	NA	NA	0.9	0.688235	0.78
GATK	VarScan	SNVer	NA	NA	NA	NA	NA	0.889744	0.547319	0.677734
GATK	VarScan	SAMtools	NA	NA	NA	NA	NA	0.889744	0.865337	0.87737
GATK	VarScan	VarDict	NA	NA	NA	NA	NA	0.9	0.768053	0.828808
GATK	LoFreq	FreeBayes	NA	NA	NA	NA	NA	0.9	0.948649	0.923684
GATK	LoFreq	SNVer	NA	NA	NA	NA	NA	0.887179	0.947945	0.916556
GATK	LoFreq	SAMtools	NA	NA	NA	NA	NA	0.887179	0.985755	0.933873
GATK	LoFreq	VarDict	NA	NA	NA	NA	NA	0.9	0.964286	0.931034
GATK	FreeBayes	SNVer	NA	NA	NA	NA	NA	0.933333	0.462516	0.618522
GATK	FreeBayes	SAMtools	NA	NA	NA	NA	NA	0.910256	0.841232	0.874384
GATK	FreeBayes	VarDict	NA	NA	NA	NA	NA	0.948718	0.775681	0.853518
GATK	SNVer	SAMtools	NA	NA	NA	NA	NA	0.894872	0.718107	0.796804
GATK	SNVer	VarDict	NA	NA	NA	NA	NA	0.933333	0.624357	0.748201
GATK	SAMtools	VarDict	NA	NA	NA	NA	NA	0.910256	0.896465	0.903308
Platypus	VarScan	LoFreq	NA	NA	NA	NA	NA	0.871795	0.988372	0.926431
Platypus	VarScan	FreeBayes	NA	NA	NA	NA	NA	0.907692	0.680769	0.778022
Platypus	VarScan	SNVer	NA	NA	NA	NA	NA	0.897436	0.531108	0.667302
Platypus	VarScan	SAMtools	NA	NA	NA	NA	NA	0.897436	0.862069	0.879397
Platypus	VarScan	VarDict	NA	NA	NA	NA	NA	0.907692	0.772926	0.834906
Platypus	LoFreq	FreeBayes	NA	NA	NA	NA	NA	0.915385	0.593023	0.719758
Platypus	LoFreq	SNVer	NA	NA	NA	NA	NA	0.902564	0.595601	0.717635
Platypus	LoFreq	SAMtools	NA	NA	NA	NA	NA	0.892308	0.980282	0.934228
Platypus	LoFreq	VarDict	NA	NA	NA	NA	NA	0.915385	0.894737	0.904943
Platypus	FreeBayes	SNVer	NA	NA	NA	NA	NA	0.951282	0.20634	0.339122
Platypus	FreeBayes	SAMtools	NA	NA	NA	NA	NA	0.917949	0.840376	0.877451
Platypus	FreeBayes	VarDict	NA	NA	NA	NA	NA	0.969231	0.64837	0.776978	best 3tool combination of both training sets	best solution training set 2
Platypus	SNVer	SAMtools	NA	NA	NA	NA	NA	0.902564	0.719836	0.80091
Platypus	SNVer	VarDict	NA	NA	NA	NA	NA	0.951282	0.512431	0.666068
Platypus	SAMtools	VarDict	NA	NA	NA	NA	NA	0.917949	0.901763	0.909784
VarScan	LoFreq	FreeBayes	NA	NA	NA	NA	NA	0.876923	0.985591	0.928087
VarScan	LoFreq	SNVer	NA	NA	NA	NA	NA	0.869231	0.988338	0.924966
VarScan	LoFreq	SAMtools	NA	NA	NA	NA	NA	0.876923	0.988439	0.929348
VarScan	LoFreq	VarDict	NA	NA	NA	NA	NA	0.876923	0.994186	0.93188
VarScan	FreeBayes	SNVer	NA	NA	NA	NA	NA	0.902564	0.6629	0.764387
VarScan	FreeBayes	SAMtools	NA	NA	NA	NA	NA	0.902564	0.893401	0.897959
VarScan	FreeBayes	VarDict	NA	NA	NA	NA	NA	0.912821	0.849642	0.880099
VarScan	SNVer	SAMtools	NA	NA	NA	NA	NA	0.892308	0.852941	0.87218
VarScan	SNVer	VarDict	NA	NA	NA	NA	NA	0.902564	0.750533	0.819558
VarScan	SAMtools	VarDict	NA	NA	NA	NA	NA	0.902564	0.946237	0.923885
LoFreq	FreeBayes	SNVer	NA	NA	NA	NA	NA	0.923077	0.351906	0.509554
LoFreq	FreeBayes	SAMtools	NA	NA	NA	NA	NA	0.9	0.972299	0.934754
LoFreq	FreeBayes	VarDict	NA	NA	NA	NA	NA	0.938462	0.651246	0.768908
LoFreq	SNVer	SAMtools	NA	NA	NA	NA	NA	0.887179	0.974648	0.928859
LoFreq	SNVer	VarDict	NA	NA	NA	NA	NA	0.923077	0.688337	0.788609
LoFreq	SAMtools	VarDict	NA	NA	NA	NA	NA	0.9	0.977716	0.93725
FreeBayes	SNVer	SAMtools	NA	NA	NA	NA	NA	0.910256	0.825581	0.865854
FreeBayes	SNVer	VarDict	NA	NA	NA	NA	NA	0.974359	0.529986	0.68654
FreeBayes	SAMtools	VarDict	NA	NA	NA	NA	NA	0.925641	0.90932	0.917408
SNVer	SAMtools	VarDict	NA	NA	NA	NA	NA	0.910256	0.883085	0.896465
GATK	Platypus	VarScan	LoFreq	NA	NA	NA	NA	0.861538	0.994083	0.923077
GATK	Platypus	VarScan	FreeBayes	NA	NA	NA	NA	0.894872	0.703629	0.78781
GATK	Platypus	VarScan	SNVer	NA	NA	NA	NA	0.884615	0.563725	0.688623
GATK	Platypus	VarScan	SAMtools	NA	NA	NA	NA	0.884615	0.873418	0.878981
GATK	Platypus	VarScan	VarDict	NA	NA	NA	NA	0.894872	0.78781	0.837935
GATK	Platypus	LoFreq	FreeBayes	NA	NA	NA	NA	0.892308	0.953425	0.921854
GATK	Platypus	LoFreq	SNVer	NA	NA	NA	NA	0.879487	0.952778	0.914667
GATK	Platypus	LoFreq	SAMtools	NA	NA	NA	NA	0.882051	0.991354	0.933514
GATK	Platypus	LoFreq	VarDict	NA	NA	NA	NA	0.892308	0.969359	0.929239
GATK	Platypus	FreeBayes	SNVer	NA	NA	NA	NA	0.923077	0.474308	0.626632
GATK	Platypus	FreeBayes	SAMtools	NA	NA	NA	NA	0.905128	0.854722	0.879203
GATK	Platypus	FreeBayes	VarDict	NA	NA	NA	NA	0.938462	0.793926	0.860165	best 4tool combination of both training sets
GATK	Platypus	SNVer	SAMtools	NA	NA	NA	NA	0.889744	0.739872	0.807916
GATK	Platypus	SNVer	VarDict	NA	NA	NA	NA	0.923077	0.658135	0.76841
GATK	Platypus	SAMtools	VarDict	NA	NA	NA	NA	0.905128	0.914508	0.909794
GATK	VarScan	LoFreq	FreeBayes	NA	NA	NA	NA	0.866667	0.994118	0.926027
GATK	VarScan	LoFreq	SNVer	NA	NA	NA	NA	0.858974	0.994065	0.921596
GATK	VarScan	LoFreq	SAMtools	NA	NA	NA	NA	0.866667	0.994118	0.926027
GATK	VarScan	LoFreq	VarDict	NA	NA	NA	NA	0.866667	0.99705	0.927298
GATK	VarScan	FreeBayes	SNVer	NA	NA	NA	NA	0.889744	0.687129	0.775419
GATK	VarScan	FreeBayes	SAMtools	NA	NA	NA	NA	0.889744	0.910761	0.90013
GATK	VarScan	FreeBayes	VarDict	NA	NA	NA	NA	0.9	0.860294	0.879699
GATK	VarScan	SNVer	SAMtools	NA	NA	NA	NA	0.879487	0.866162	0.872774
GATK	VarScan	SNVer	VarDict	NA	NA	NA	NA	0.889744	0.767699	0.824228
GATK	VarScan	SAMtools	VarDict	NA	NA	NA	NA	0.889744	0.953297	0.920424
GATK	LoFreq	FreeBayes	SNVer	NA	NA	NA	NA	0.887179	0.947945	0.916556
GATK	LoFreq	FreeBayes	SAMtools	NA	NA	NA	NA	0.887179	0.985755	0.933873
GATK	LoFreq	FreeBayes	VarDict	NA	NA	NA	NA	0.9	0.964286	0.931034
GATK	LoFreq	SNVer	SAMtools	NA	NA	NA	NA	0.874359	0.985549	0.92663
GATK	LoFreq	SNVer	VarDict	NA	NA	NA	NA	0.887179	0.963788	0.923899
GATK	LoFreq	SAMtools	VarDict	NA	NA	NA	NA	0.887179	0.988571	0.935135
GATK	FreeBayes	SNVer	SAMtools	NA	NA	NA	NA	0.894872	0.840964	0.867081
GATK	FreeBayes	SNVer	VarDict	NA	NA	NA	NA	0.933333	0.776119	0.847497
GATK	FreeBayes	SAMtools	VarDict	NA	NA	NA	NA	0.910256	0.922078	0.916129
GATK	SNVer	SAMtools	VarDict	NA	NA	NA	NA	0.894872	0.897172	0.896021
Platypus	VarScan	LoFreq	FreeBayes	NA	NA	NA	NA	0.871795	0.988372	0.926431
Platypus	VarScan	LoFreq	SNVer	NA	NA	NA	NA	0.864103	0.98827	0.922025
Platypus	VarScan	LoFreq	SAMtools	NA	NA	NA	NA	0.871795	0.991254	0.927694
Platypus	VarScan	LoFreq	VarDict	NA	NA	NA	NA	0.871795	0.994152	0.928962
Platypus	VarScan	FreeBayes	SNVer	NA	NA	NA	NA	0.897436	0.678295	0.772627
Platypus	VarScan	FreeBayes	SAMtools	NA	NA	NA	NA	0.897436	0.909091	0.903226
Platypus	VarScan	FreeBayes	VarDict	NA	NA	NA	NA	0.907692	0.865526	0.886108
Platypus	VarScan	SNVer	SAMtools	NA	NA	NA	NA	0.887179	0.860697	0.873737
Platypus	VarScan	SNVer	VarDict	NA	NA	NA	NA	0.897436	0.770925	0.829384
Platypus	VarScan	SAMtools	VarDict	NA	NA	NA	NA	0.897436	0.958904	0.927152
Platypus	LoFreq	FreeBayes	SNVer	NA	NA	NA	NA	0.902564	0.60274	0.722793
Platypus	LoFreq	FreeBayes	SAMtools	NA	NA	NA	NA	0.892308	0.980282	0.934228
Platypus	LoFreq	FreeBayes	VarDict	NA	NA	NA	NA	0.915385	0.908397	0.911877
Platypus	LoFreq	SNVer	SAMtools	NA	NA	NA	NA	0.879487	0.98	0.927027
Platypus	LoFreq	SNVer	VarDict	NA	NA	NA	NA	0.902564	0.895674	0.899106
Platypus	LoFreq	SAMtools	VarDict	NA	NA	NA	NA	0.892308	0.983051	0.935484
Platypus	FreeBayes	SNVer	SAMtools	NA	NA	NA	NA	0.902564	0.838095	0.869136
Platypus	FreeBayes	SNVer	VarDict	NA	NA	NA	NA	0.951282	0.6625	0.781053
Platypus	FreeBayes	SAMtools	VarDict	NA	NA	NA	NA	0.917949	0.927461	0.92268
Platypus	SNVer	SAMtools	VarDict	NA	NA	NA	NA	0.902564	0.900256	0.901408
VarScan	LoFreq	FreeBayes	SNVer	NA	NA	NA	NA	0.869231	0.988338	0.924966
VarScan	LoFreq	FreeBayes	SAMtools	NA	NA	NA	NA	0.876923	0.988439	0.929348
VarScan	LoFreq	FreeBayes	VarDict	NA	NA	NA	NA	0.876923	0.994186	0.93188
VarScan	LoFreq	SNVer	SAMtools	NA	NA	NA	NA	0.869231	0.991228	0.92623
VarScan	LoFreq	SNVer	VarDict	NA	NA	NA	NA	0.869231	0.994135	0.927497
VarScan	LoFreq	SAMtools	VarDict	NA	NA	NA	NA	0.876923	0.994186	0.93188
VarScan	FreeBayes	SNVer	SAMtools	NA	NA	NA	NA	0.892308	0.899225	0.895753
VarScan	FreeBayes	SNVer	VarDict	NA	NA	NA	NA	0.902564	0.850242	0.875622
VarScan	FreeBayes	SAMtools	VarDict	NA	NA	NA	NA	0.902564	0.95393	0.927536
VarScan	SNVer	SAMtools	VarDict	NA	NA	NA	NA	0.892308	0.948229	0.919419
LoFreq	FreeBayes	SNVer	SAMtools	NA	NA	NA	NA	0.887179	0.974648	0.928859
LoFreq	FreeBayes	SNVer	VarDict	NA	NA	NA	NA	0.923077	0.707269	0.80089
LoFreq	FreeBayes	SAMtools	VarDict	NA	NA	NA	NA	0.9	0.977716	0.93725
LoFreq	SNVer	SAMtools	VarDict	NA	NA	NA	NA	0.887179	0.977401	0.930108
FreeBayes	SNVer	SAMtools	VarDict	NA	NA	NA	NA	0.910256	0.910256	0.910256
GATK	Platypus	VarScan	LoFreq	FreeBayes	NA	NA	NA	0.861538	0.994083	0.923077
GATK	Platypus	VarScan	LoFreq	SNVer	NA	NA	NA	0.853846	0.99403	0.918621
GATK	Platypus	VarScan	LoFreq	SAMtools	NA	NA	NA	0.861538	0.994083	0.923077
GATK	Platypus	VarScan	LoFreq	VarDict	NA	NA	NA	0.861538	0.997033	0.924347
GATK	Platypus	VarScan	FreeBayes	SNVer	NA	NA	NA	0.884615	0.70122	0.782313
GATK	Platypus	VarScan	FreeBayes	SAMtools	NA	NA	NA	0.884615	0.92	0.901961
GATK	Platypus	VarScan	FreeBayes	VarDict	NA	NA	NA	0.894872	0.874687	0.884664
GATK	Platypus	VarScan	SNVer	SAMtools	NA	NA	NA	0.874359	0.872123	0.873239
GATK	Platypus	VarScan	SNVer	VarDict	NA	NA	NA	0.884615	0.785877	0.832328
GATK	Platypus	VarScan	SAMtools	VarDict	NA	NA	NA	0.884615	0.963687	0.92246
GATK	Platypus	LoFreq	FreeBayes	SNVer	NA	NA	NA	0.879487	0.952778	0.914667
GATK	Platypus	LoFreq	FreeBayes	SAMtools	NA	NA	NA	0.882051	0.991354	0.933514
GATK	Platypus	LoFreq	FreeBayes	VarDict	NA	NA	NA	0.892308	0.969359	0.929239	best 5tool combination of both training sets
GATK	Platypus	LoFreq	SNVer	SAMtools	NA	NA	NA	0.869231	0.991228	0.92623
GATK	Platypus	LoFreq	SNVer	VarDict	NA	NA	NA	0.879487	0.968927	0.922043
GATK	Platypus	LoFreq	SAMtools	VarDict	NA	NA	NA	0.882051	0.99422	0.934783
GATK	Platypus	FreeBayes	SNVer	SAMtools	NA	NA	NA	0.889744	0.85258	0.870765
GATK	Platypus	FreeBayes	SNVer	VarDict	NA	NA	NA	0.923077	0.791209	0.852071
GATK	Platypus	FreeBayes	SAMtools	VarDict	NA	NA	NA	0.905128	0.93883	0.921671
GATK	Platypus	SNVer	SAMtools	VarDict	NA	NA	NA	0.889744	0.913158	0.901299
GATK	VarScan	LoFreq	FreeBayes	SNVer	NA	NA	NA	0.858974	0.994065	0.921596
GATK	VarScan	LoFreq	FreeBayes	SAMtools	NA	NA	NA	0.866667	0.994118	0.926027
GATK	VarScan	LoFreq	FreeBayes	VarDict	NA	NA	NA	0.866667	0.99705	0.927298
GATK	VarScan	LoFreq	SNVer	SAMtools	NA	NA	NA	0.858974	0.994065	0.921596
GATK	VarScan	LoFreq	SNVer	VarDict	NA	NA	NA	0.858974	0.997024	0.922865
GATK	VarScan	LoFreq	SAMtools	VarDict	NA	NA	NA	0.866667	0.99705	0.927298
GATK	VarScan	FreeBayes	SNVer	SAMtools	NA	NA	NA	0.879487	0.912234	0.895561
GATK	VarScan	FreeBayes	SNVer	VarDict	NA	NA	NA	0.889744	0.861042	0.875158
GATK	VarScan	FreeBayes	SAMtools	VarDict	NA	NA	NA	0.889744	0.961219	0.924101
GATK	VarScan	SNVer	SAMtools	VarDict	NA	NA	NA	0.879487	0.955432	0.915888
GATK	LoFreq	FreeBayes	SNVer	SAMtools	NA	NA	NA	0.874359	0.985549	0.92663
GATK	LoFreq	FreeBayes	SNVer	VarDict	NA	NA	NA	0.887179	0.963788	0.923899
GATK	LoFreq	FreeBayes	SAMtools	VarDict	NA	NA	NA	0.887179	0.988571	0.935135
GATK	LoFreq	SNVer	SAMtools	VarDict	NA	NA	NA	0.874359	0.988406	0.927891
GATK	FreeBayes	SNVer	SAMtools	VarDict	NA	NA	NA	0.894872	0.92328	0.908854
Platypus	VarScan	LoFreq	FreeBayes	SNVer	NA	NA	NA	0.864103	0.98827	0.922025
Platypus	VarScan	LoFreq	FreeBayes	SAMtools	NA	NA	NA	0.871795	0.991254	0.927694
Platypus	VarScan	LoFreq	FreeBayes	VarDict	NA	NA	NA	0.871795	0.994152	0.928962
Platypus	VarScan	LoFreq	SNVer	SAMtools	NA	NA	NA	0.864103	0.991176	0.923288
Platypus	VarScan	LoFreq	SNVer	VarDict	NA	NA	NA	0.864103	0.9941	0.924554
Platypus	VarScan	LoFreq	SAMtools	VarDict	NA	NA	NA	0.871795	0.994152	0.928962
Platypus	VarScan	FreeBayes	SNVer	SAMtools	NA	NA	NA	0.887179	0.908136	0.897536
Platypus	VarScan	FreeBayes	SNVer	VarDict	NA	NA	NA	0.897436	0.864198	0.880503
Platypus	VarScan	FreeBayes	SAMtools	VarDict	NA	NA	NA	0.897436	0.966851	0.930851
Platypus	VarScan	SNVer	SAMtools	VarDict	NA	NA	NA	0.887179	0.958449	0.921438
Platypus	LoFreq	FreeBayes	SNVer	SAMtools	NA	NA	NA	0.879487	0.98	0.927027
Platypus	LoFreq	FreeBayes	SNVer	VarDict	NA	NA	NA	0.902564	0.907216	0.904884
Platypus	LoFreq	FreeBayes	SAMtools	VarDict	NA	NA	NA	0.892308	0.983051	0.935484
Platypus	LoFreq	SNVer	SAMtools	VarDict	NA	NA	NA	0.879487	0.982808	0.928281
Platypus	FreeBayes	SNVer	SAMtools	VarDict	NA	NA	NA	0.902564	0.926316	0.914286
VarScan	LoFreq	FreeBayes	SNVer	SAMtools	NA	NA	NA	0.869231	0.991228	0.92623
VarScan	LoFreq	FreeBayes	SNVer	VarDict	NA	NA	NA	0.869231	0.994135	0.927497
VarScan	LoFreq	FreeBayes	SAMtools	VarDict	NA	NA	NA	0.876923	0.994186	0.93188
VarScan	LoFreq	SNVer	SAMtools	VarDict	NA	NA	NA	0.869231	0.994135	0.927497
VarScan	FreeBayes	SNVer	SAMtools	VarDict	NA	NA	NA	0.892308	0.956044	0.923077
LoFreq	FreeBayes	SNVer	SAMtools	VarDict	NA	NA	NA	0.887179	0.977401	0.930108
GATK	Platypus	VarScan	LoFreq	FreeBayes	SNVer	NA	NA	0.853846	0.99403	0.918621
GATK	Platypus	VarScan	LoFreq	FreeBayes	SAMtools	NA	NA	0.861538	0.994083	0.923077
GATK	Platypus	VarScan	LoFreq	FreeBayes	VarDict	NA	NA	0.861538	0.997033	0.924347
GATK	Platypus	VarScan	LoFreq	SNVer	SAMtools	NA	NA	0.853846	0.99403	0.918621
GATK	Platypus	VarScan	LoFreq	SNVer	VarDict	NA	NA	0.853846	0.997006	0.91989
GATK	Platypus	VarScan	LoFreq	SAMtools	VarDict	NA	NA	0.861538	0.997033	0.924347
GATK	Platypus	VarScan	FreeBayes	SNVer	SAMtools	NA	NA	0.874359	0.919137	0.896189
GATK	Platypus	VarScan	FreeBayes	SNVer	VarDict	NA	NA	0.884615	0.873418	0.878981
GATK	Platypus	VarScan	FreeBayes	SAMtools	VarDict	NA	NA	0.884615	0.971831	0.926174
GATK	Platypus	VarScan	SNVer	SAMtools	VarDict	NA	NA	0.874359	0.963277	0.916667
GATK	Platypus	LoFreq	FreeBayes	SNVer	SAMtools	NA	NA	0.869231	0.991228	0.92623
GATK	Platypus	LoFreq	FreeBayes	SNVer	VarDict	NA	NA	0.879487	0.968927	0.922043
GATK	Platypus	LoFreq	FreeBayes	SAMtools	VarDict	NA	NA	0.882051	0.99422	0.934783	best 6tool combination of both training sets
GATK	Platypus	LoFreq	SNVer	SAMtools	VarDict	NA	NA	0.869231	0.994135	0.927497
GATK	Platypus	FreeBayes	SNVer	SAMtools	VarDict	NA	NA	0.889744	0.937838	0.913158
GATK	VarScan	LoFreq	FreeBayes	SNVer	SAMtools	NA	NA	0.858974	0.994065	0.921596
GATK	VarScan	LoFreq	FreeBayes	SNVer	VarDict	NA	NA	0.858974	0.997024	0.922865
GATK	VarScan	LoFreq	FreeBayes	SAMtools	VarDict	NA	NA	0.866667	0.99705	0.927298
GATK	VarScan	LoFreq	SNVer	SAMtools	VarDict	NA	NA	0.858974	0.997024	0.922865
GATK	VarScan	FreeBayes	SNVer	SAMtools	VarDict	NA	NA	0.879487	0.963483	0.919571
GATK	LoFreq	FreeBayes	SNVer	SAMtools	VarDict	NA	NA	0.874359	0.988406	0.927891
Platypus	VarScan	LoFreq	FreeBayes	SNVer	SAMtools	NA	NA	0.864103	0.991176	0.923288
Platypus	VarScan	LoFreq	FreeBayes	SNVer	VarDict	NA	NA	0.864103	0.9941	0.924554
Platypus	VarScan	LoFreq	FreeBayes	SAMtools	VarDict	NA	NA	0.871795	0.994152	0.928962
Platypus	VarScan	LoFreq	SNVer	SAMtools	VarDict	NA	NA	0.864103	0.9941	0.924554
Platypus	VarScan	FreeBayes	SNVer	SAMtools	VarDict	NA	NA	0.887179	0.96648	0.925134
Platypus	LoFreq	FreeBayes	SNVer	SAMtools	VarDict	NA	NA	0.879487	0.982808	0.928281
VarScan	LoFreq	FreeBayes	SNVer	SAMtools	VarDict	NA	NA	0.869231	0.994135	0.927497
GATK	Platypus	VarScan	LoFreq	FreeBayes	SNVer	SAMtools	NA	0.853846	0.99403	0.918621
GATK	Platypus	VarScan	LoFreq	FreeBayes	SNVer	VarDict	NA	0.853846	0.997006	0.91989
GATK	Platypus	VarScan	LoFreq	FreeBayes	SAMtools	VarDict	NA	0.861538	0.997033	0.924347	best 7tool combination of both training sets
GATK	Platypus	VarScan	LoFreq	SNVer	SAMtools	VarDict	NA	0.853846	0.997006	0.91989
GATK	Platypus	VarScan	FreeBayes	SNVer	SAMtools	VarDict	NA	0.874359	0.97151	0.920378
GATK	Platypus	LoFreq	FreeBayes	SNVer	SAMtools	VarDict	NA	0.869231	0.994135	0.927497
GATK	VarScan	LoFreq	FreeBayes	SNVer	SAMtools	VarDict	NA	0.858974	0.997024	0.922865
Platypus	VarScan	LoFreq	FreeBayes	SNVer	SAMtools	VarDict	NA	0.864103	0.9941	0.924554
GATK	Platypus	VarScan	LoFreq	FreeBayes	SNVer	SAMtools	VarDict	0.853846	0.997006	0.91989	8 tools

## Sheet: Test 4
Caller 1	Caller 2	Caller 3	Caller 4	Caller 5	Caller 6	Caller 7	Caller 8	Sensitivity	PPV	F1
GATK	NA	NA	NA	NA	NA	NA	NA	0.857895	0.730942	0.789346	best single tool of both training sets
Platypus	NA	NA	NA	NA	NA	NA	NA	0.910526	0.303509	0.455263
VarScan	NA	NA	NA	NA	NA	NA	NA	0.731579	0.547244	0.626126
LoFreq	NA	NA	NA	NA	NA	NA	NA	0.726316	0.0149788	0.0293523
FreeBayes	NA	NA	NA	NA	NA	NA	NA	0.947368	0.00531146	0.0105637
SNVer	NA	NA	NA	NA	NA	NA	NA	0.636842	0.044948	0.0839695
SAMtools	NA	NA	NA	NA	NA	NA	NA	0.7	0.534137	0.605923
VarDict	NA	NA	NA	NA	NA	NA	NA	0.910526	0.0910526	0.16555	best solution training set 1
GATK	Platypus	NA	NA	NA	NA	NA	NA	0.852632	0.920455	0.885246
GATK	VarScan	NA	NA	NA	NA	NA	NA	0.678947	0.948529	0.791411
GATK	LoFreq	NA	NA	NA	NA	NA	NA	0.657895	0.932836	0.771605
GATK	FreeBayes	NA	NA	NA	NA	NA	NA	0.842105	0.816327	0.829016
GATK	SNVer	NA	NA	NA	NA	NA	NA	0.563158	0.816794	0.666667
GATK	SAMtools	NA	NA	NA	NA	NA	NA	0.663158	0.961832	0.785047
GATK	VarDict	NA	NA	NA	NA	NA	NA	0.821053	0.871508	0.845528
Platypus	VarScan	NA	NA	NA	NA	NA	NA	0.710526	0.888158	0.789474
Platypus	LoFreq	NA	NA	NA	NA	NA	NA	0.684211	0.663265	0.673575
Platypus	FreeBayes	NA	NA	NA	NA	NA	NA	0.889474	0.311234	0.461119
Platypus	SNVer	NA	NA	NA	NA	NA	NA	0.594737	0.285354	0.385666
Platypus	SAMtools	NA	NA	NA	NA	NA	NA	0.678947	0.902098	0.774775
Platypus	VarDict	NA	NA	NA	NA	NA	NA	0.847368	0.947059	0.894444	best combination of both training sets
VarScan	LoFreq	NA	NA	NA	NA	NA	NA	0.626316	0.62963	0.627968
VarScan	FreeBayes	NA	NA	NA	NA	NA	NA	0.7	0.585903	0.63789
VarScan	SNVer	NA	NA	NA	NA	NA	NA	0.431579	0.863158	0.575439
VarScan	SAMtools	NA	NA	NA	NA	NA	NA	0.657895	0.661376	0.659631
VarScan	VarDict	NA	NA	NA	NA	NA	NA	0.684211	0.802469	0.738636
LoFreq	FreeBayes	NA	NA	NA	NA	NA	NA	0.715789	0.015138	0.029649
LoFreq	SNVer	NA	NA	NA	NA	NA	NA	0.410526	0.227405	0.292683
LoFreq	SAMtools	NA	NA	NA	NA	NA	NA	0.657895	0.628141	0.642674
LoFreq	VarDict	NA	NA	NA	NA	NA	NA	0.678947	0.156744	0.254689
FreeBayes	SNVer	NA	NA	NA	NA	NA	NA	0.610526	0.0436583	0.0814893
FreeBayes	SAMtools	NA	NA	NA	NA	NA	NA	0.678947	0.565789	0.617225
FreeBayes	VarDict	NA	NA	NA	NA	NA	NA	0.868421	0.0917686	0.165996
SNVer	SAMtools	NA	NA	NA	NA	NA	NA	0.394737	0.914634	0.551471
SNVer	VarDict	NA	NA	NA	NA	NA	NA	0.589474	0.216216	0.316384
SAMtools	VarDict	NA	NA	NA	NA	NA	NA	0.657895	0.94697	0.776398
GATK	Platypus	VarScan	NA	NA	NA	NA	NA	0.673684	0.969697	0.795031
GATK	Platypus	LoFreq	NA	NA	NA	NA	NA	0.652632	0.976378	0.782334
GATK	Platypus	FreeBayes	NA	NA	NA	NA	NA	0.836842	0.924419	0.878453
GATK	Platypus	SNVer	NA	NA	NA	NA	NA	0.557895	0.883333	0.683871
GATK	Platypus	SAMtools	NA	NA	NA	NA	NA	0.657895	0.984252	0.788644
GATK	Platypus	VarDict	NA	NA	NA	NA	NA	0.815789	0.974843	0.888252
GATK	VarScan	LoFreq	NA	NA	NA	NA	NA	0.605263	0.966387	0.744337
GATK	VarScan	FreeBayes	NA	NA	NA	NA	NA	0.663158	0.954545	0.782609
GATK	VarScan	SNVer	NA	NA	NA	NA	NA	0.405263	0.927711	0.564103
GATK	VarScan	SAMtools	NA	NA	NA	NA	NA	0.626316	0.97541	0.762821
GATK	VarScan	VarDict	NA	NA	NA	NA	NA	0.652632	0.976378	0.782334
GATK	LoFreq	FreeBayes	NA	NA	NA	NA	NA	0.652632	0.946565	0.772586
GATK	LoFreq	SNVer	NA	NA	NA	NA	NA	0.373684	0.959459	0.537879
GATK	LoFreq	SAMtools	NA	NA	NA	NA	NA	0.631579	0.967742	0.764331
GATK	LoFreq	VarDict	NA	NA	NA	NA	NA	0.631579	0.991736	0.771704
GATK	FreeBayes	SNVer	NA	NA	NA	NA	NA	0.547368	0.825397	0.658228
GATK	FreeBayes	SAMtools	NA	NA	NA	NA	NA	0.652632	0.96875	0.779874
GATK	FreeBayes	VarDict	NA	NA	NA	NA	NA	0.805263	0.905325	0.852368
GATK	SNVer	SAMtools	NA	NA	NA	NA	NA	0.384211	0.960526	0.548872
GATK	SNVer	VarDict	NA	NA	NA	NA	NA	0.536842	0.927273	0.68
GATK	SAMtools	VarDict	NA	NA	NA	NA	NA	0.636842	0.991803	0.775641
Platypus	VarScan	LoFreq	NA	NA	NA	NA	NA	0.621053	0.887218	0.73065
Platypus	VarScan	FreeBayes	NA	NA	NA	NA	NA	0.694737	0.885906	0.778761
Platypus	VarScan	SNVer	NA	NA	NA	NA	NA	0.421053	0.941176	0.581818
Platypus	VarScan	SAMtools	NA	NA	NA	NA	NA	0.642105	0.897059	0.748466
Platypus	VarScan	VarDict	NA	NA	NA	NA	NA	0.668421	0.992188	0.798742
Platypus	LoFreq	FreeBayes	NA	NA	NA	NA	NA	0.673684	0.659794	0.666667
Platypus	LoFreq	SNVer	NA	NA	NA	NA	NA	0.378947	0.96	0.543396
Platypus	LoFreq	SAMtools	NA	NA	NA	NA	NA	0.647368	0.89781	0.752294
Platypus	LoFreq	VarDict	NA	NA	NA	NA	NA	0.647368	0.991935	0.783439
Platypus	FreeBayes	SNVer	NA	NA	NA	NA	NA	0.573684	0.280928	0.377163
Platypus	FreeBayes	SAMtools	NA	NA	NA	NA	NA	0.668421	0.900709	0.767372
Platypus	FreeBayes	VarDict	NA	NA	NA	NA	NA	0.826316	0.951515	0.884507	best 3tool combination of both training sets	best solution training set 2
Platypus	SNVer	SAMtools	NA	NA	NA	NA	NA	0.384211	0.973333	0.550943
Platypus	SNVer	VarDict	NA	NA	NA	NA	NA	0.552632	0.954545	0.7
Platypus	SAMtools	VarDict	NA	NA	NA	NA	NA	0.642105	1	0.782051
VarScan	LoFreq	FreeBayes	NA	NA	NA	NA	NA	0.621053	0.694118	0.655556
VarScan	LoFreq	SNVer	NA	NA	NA	NA	NA	0.342105	0.955882	0.503876
VarScan	LoFreq	SAMtools	NA	NA	NA	NA	NA	0.615789	0.672414	0.642857
VarScan	LoFreq	VarDict	NA	NA	NA	NA	NA	0.594737	0.982609	0.740984
VarScan	FreeBayes	SNVer	NA	NA	NA	NA	NA	0.410526	0.866667	0.557143
VarScan	FreeBayes	SAMtools	NA	NA	NA	NA	NA	0.636842	0.707602	0.67036
VarScan	FreeBayes	VarDict	NA	NA	NA	NA	NA	0.657895	0.806452	0.724638
VarScan	SNVer	SAMtools	NA	NA	NA	NA	NA	0.368421	0.972222	0.534351
VarScan	SNVer	VarDict	NA	NA	NA	NA	NA	0.410526	0.939759	0.571429
VarScan	SAMtools	VarDict	NA	NA	NA	NA	NA	0.621053	0.95935	0.753994
LoFreq	FreeBayes	SNVer	NA	NA	NA	NA	NA	0.4	0.224852	0.287879
LoFreq	FreeBayes	SAMtools	NA	NA	NA	NA	NA	0.652632	0.673913	0.663102
LoFreq	FreeBayes	VarDict	NA	NA	NA	NA	NA	0.668421	0.15602	0.252988
LoFreq	SNVer	SAMtools	NA	NA	NA	NA	NA	0.368421	0.972222	0.534351
LoFreq	SNVer	VarDict	NA	NA	NA	NA	NA	0.389474	0.258741	0.310924
LoFreq	SAMtools	VarDict	NA	NA	NA	NA	NA	0.621053	1	0.766234
FreeBayes	SNVer	SAMtools	NA	NA	NA	NA	NA	0.384211	0.9125	0.540741
FreeBayes	SNVer	VarDict	NA	NA	NA	NA	NA	0.563158	0.211881	0.307914
FreeBayes	SAMtools	VarDict	NA	NA	NA	NA	NA	0.642105	0.945736	0.76489
SNVer	SAMtools	VarDict	NA	NA	NA	NA	NA	0.378947	0.986301	0.547529
GATK	Platypus	VarScan	LoFreq	NA	NA	NA	NA	0.6	0.974359	0.742671
GATK	Platypus	VarScan	FreeBayes	NA	NA	NA	NA	0.657895	0.968992	0.783699
GATK	Platypus	VarScan	SNVer	NA	NA	NA	NA	0.4	0.95	0.562963
GATK	Platypus	VarScan	SAMtools	NA	NA	NA	NA	0.621053	0.983333	0.76129
GATK	Platypus	VarScan	VarDict	NA	NA	NA	NA	0.647368	0.991935	0.783439
GATK	Platypus	LoFreq	FreeBayes	NA	NA	NA	NA	0.647368	0.97619	0.778481
GATK	Platypus	LoFreq	SNVer	NA	NA	NA	NA	0.368421	0.958904	0.532319
GATK	Platypus	LoFreq	SAMtools	NA	NA	NA	NA	0.626316	0.983471	0.765273
GATK	Platypus	LoFreq	VarDict	NA	NA	NA	NA	0.626316	0.991667	0.767742
GATK	Platypus	FreeBayes	SNVer	NA	NA	NA	NA	0.542105	0.887931	0.673203
GATK	Platypus	FreeBayes	SAMtools	NA	NA	NA	NA	0.647368	0.984	0.780952
GATK	Platypus	FreeBayes	VarDict	NA	NA	NA	NA	0.8	0.974359	0.878613	best 4tool combination of both training sets
GATK	Platypus	SNVer	SAMtools	NA	NA	NA	NA	0.378947	0.972973	0.545455
GATK	Platypus	SNVer	VarDict	NA	NA	NA	NA	0.531579	0.961905	0.684746
GATK	Platypus	SAMtools	VarDict	NA	NA	NA	NA	0.631579	1	0.774194
GATK	VarScan	LoFreq	FreeBayes	NA	NA	NA	NA	0.6	0.974359	0.742671
GATK	VarScan	LoFreq	SNVer	NA	NA	NA	NA	0.336842	0.955224	0.498054
GATK	VarScan	LoFreq	SAMtools	NA	NA	NA	NA	0.594737	0.974138	0.738562
GATK	VarScan	LoFreq	VarDict	NA	NA	NA	NA	0.584211	0.991071	0.735099
GATK	VarScan	FreeBayes	SNVer	NA	NA	NA	NA	0.389474	0.925	0.548148
GATK	VarScan	FreeBayes	SAMtools	NA	NA	NA	NA	0.615789	0.983193	0.757282
GATK	VarScan	FreeBayes	VarDict	NA	NA	NA	NA	0.636842	0.975806	0.770701
GATK	VarScan	SNVer	SAMtools	NA	NA	NA	NA	0.363158	0.971831	0.528736
GATK	VarScan	SNVer	VarDict	NA	NA	NA	NA	0.389474	0.961039	0.554307
GATK	VarScan	SAMtools	VarDict	NA	NA	NA	NA	0.605263	1	0.754098
GATK	LoFreq	FreeBayes	SNVer	NA	NA	NA	NA	0.368421	0.958904	0.532319
GATK	LoFreq	FreeBayes	SAMtools	NA	NA	NA	NA	0.626316	0.97541	0.762821
GATK	LoFreq	FreeBayes	VarDict	NA	NA	NA	NA	0.626316	0.991667	0.767742
GATK	LoFreq	SNVer	SAMtools	NA	NA	NA	NA	0.357895	0.971429	0.523077
GATK	LoFreq	SNVer	VarDict	NA	NA	NA	NA	0.357895	0.985507	0.525097
GATK	LoFreq	SAMtools	VarDict	NA	NA	NA	NA	0.605263	1	0.754098
GATK	FreeBayes	SNVer	SAMtools	NA	NA	NA	NA	0.373684	0.959459	0.537879
GATK	FreeBayes	SNVer	VarDict	NA	NA	NA	NA	0.521053	0.925234	0.666667
GATK	FreeBayes	SAMtools	VarDict	NA	NA	NA	NA	0.626316	0.991667	0.767742
GATK	SNVer	SAMtools	VarDict	NA	NA	NA	NA	0.368421	0.985915	0.536398
Platypus	VarScan	LoFreq	FreeBayes	NA	NA	NA	NA	0.615789	0.886364	0.726708
Platypus	VarScan	LoFreq	SNVer	NA	NA	NA	NA	0.336842	0.955224	0.498054
Platypus	VarScan	LoFreq	SAMtools	NA	NA	NA	NA	0.610526	0.892308	0.725
Platypus	VarScan	LoFreq	VarDict	NA	NA	NA	NA	0.589474	0.99115	0.739274
Platypus	VarScan	FreeBayes	SNVer	NA	NA	NA	NA	0.405263	0.939024	0.566176
Platypus	VarScan	FreeBayes	SAMtools	NA	NA	NA	NA	0.631579	0.895522	0.740741
Platypus	VarScan	FreeBayes	VarDict	NA	NA	NA	NA	0.652632	0.992	0.787302
Platypus	VarScan	SNVer	SAMtools	NA	NA	NA	NA	0.363158	0.971831	0.528736
Platypus	VarScan	SNVer	VarDict	NA	NA	NA	NA	0.4	0.987013	0.569288
Platypus	VarScan	SAMtools	VarDict	NA	NA	NA	NA	0.610526	1	0.75817
Platypus	LoFreq	FreeBayes	SNVer	NA	NA	NA	NA	0.368421	0.958904	0.532319
Platypus	LoFreq	FreeBayes	SAMtools	NA	NA	NA	NA	0.642105	0.897059	0.748466
Platypus	LoFreq	FreeBayes	VarDict	NA	NA	NA	NA	0.636842	0.991803	0.775641
Platypus	LoFreq	SNVer	SAMtools	NA	NA	NA	NA	0.357895	0.971429	0.523077
Platypus	LoFreq	SNVer	VarDict	NA	NA	NA	NA	0.363158	0.985714	0.530769
Platypus	LoFreq	SAMtools	VarDict	NA	NA	NA	NA	0.610526	1	0.75817
Platypus	FreeBayes	SNVer	SAMtools	NA	NA	NA	NA	0.373684	0.972603	0.539924
Platypus	FreeBayes	SNVer	VarDict	NA	NA	NA	NA	0.531579	0.961905	0.684746
Platypus	FreeBayes	SAMtools	VarDict	NA	NA	NA	NA	0.631579	1	0.774194
Platypus	SNVer	SAMtools	VarDict	NA	NA	NA	NA	0.368421	1	0.538462
VarScan	LoFreq	FreeBayes	SNVer	NA	NA	NA	NA	0.336842	0.955224	0.498054
VarScan	LoFreq	FreeBayes	SAMtools	NA	NA	NA	NA	0.610526	0.72956	0.664756
VarScan	LoFreq	FreeBayes	VarDict	NA	NA	NA	NA	0.589474	0.982456	0.736842
VarScan	LoFreq	SNVer	SAMtools	NA	NA	NA	NA	0.342105	0.970149	0.505837
VarScan	LoFreq	SNVer	VarDict	NA	NA	NA	NA	0.331579	0.984375	0.496063
VarScan	LoFreq	SAMtools	VarDict	NA	NA	NA	NA	0.584211	1	0.737542
VarScan	FreeBayes	SNVer	SAMtools	NA	NA	NA	NA	0.357895	0.971429	0.523077
VarScan	FreeBayes	SNVer	VarDict	NA	NA	NA	NA	0.389474	0.948718	0.552239
VarScan	FreeBayes	SAMtools	VarDict	NA	NA	NA	NA	0.605263	0.958333	0.741935
VarScan	SNVer	SAMtools	VarDict	NA	NA	NA	NA	0.357895	1	0.527132
LoFreq	FreeBayes	SNVer	SAMtools	NA	NA	NA	NA	0.363158	0.971831	0.528736
LoFreq	FreeBayes	SNVer	VarDict	NA	NA	NA	NA	0.378947	0.254417	0.30444
LoFreq	FreeBayes	SAMtools	VarDict	NA	NA	NA	NA	0.615789	1	0.762215
LoFreq	SNVer	SAMtools	VarDict	NA	NA	NA	NA	0.352632	1	0.521401
FreeBayes	SNVer	SAMtools	VarDict	NA	NA	NA	NA	0.368421	0.985915	0.536398
GATK	Platypus	VarScan	LoFreq	FreeBayes	NA	NA	NA	0.594737	0.974138	0.738562
GATK	Platypus	VarScan	LoFreq	SNVer	NA	NA	NA	0.331579	0.954545	0.492188
GATK	Platypus	VarScan	LoFreq	SAMtools	NA	NA	NA	0.589474	0.982456	0.736842
GATK	Platypus	VarScan	LoFreq	VarDict	NA	NA	NA	0.578947	0.990991	0.730897
GATK	Platypus	VarScan	FreeBayes	SNVer	NA	NA	NA	0.384211	0.948052	0.546816
GATK	Platypus	VarScan	FreeBayes	SAMtools	NA	NA	NA	0.610526	0.983051	0.753247
GATK	Platypus	VarScan	FreeBayes	VarDict	NA	NA	NA	0.631579	0.991736	0.771704
GATK	Platypus	VarScan	SNVer	SAMtools	NA	NA	NA	0.357895	0.971429	0.523077
GATK	Platypus	VarScan	SNVer	VarDict	NA	NA	NA	0.384211	0.986486	0.55303
GATK	Platypus	VarScan	SAMtools	VarDict	NA	NA	NA	0.6	1	0.75
GATK	Platypus	LoFreq	FreeBayes	SNVer	NA	NA	NA	0.363158	0.958333	0.526718
GATK	Platypus	LoFreq	FreeBayes	SAMtools	NA	NA	NA	0.621053	0.983333	0.76129
GATK	Platypus	LoFreq	FreeBayes	VarDict	NA	NA	NA	0.621053	0.991597	0.763754	best 5tool combination of both training sets
GATK	Platypus	LoFreq	SNVer	SAMtools	NA	NA	NA	0.352632	0.971014	0.517375
GATK	Platypus	LoFreq	SNVer	VarDict	NA	NA	NA	0.352632	0.985294	0.51938
GATK	Platypus	LoFreq	SAMtools	VarDict	NA	NA	NA	0.6	1	0.75
GATK	Platypus	FreeBayes	SNVer	SAMtools	NA	NA	NA	0.368421	0.972222	0.534351
GATK	Platypus	FreeBayes	SNVer	VarDict	NA	NA	NA	0.515789	0.960784	0.671233
GATK	Platypus	FreeBayes	SAMtools	VarDict	NA	NA	NA	0.621053	1	0.766234
GATK	Platypus	SNVer	SAMtools	VarDict	NA	NA	NA	0.363158	1	0.532819
GATK	VarScan	LoFreq	FreeBayes	SNVer	NA	NA	NA	0.331579	0.954545	0.492188
GATK	VarScan	LoFreq	FreeBayes	SAMtools	NA	NA	NA	0.589474	0.982456	0.736842
GATK	VarScan	LoFreq	FreeBayes	VarDict	NA	NA	NA	0.578947	0.990991	0.730897
GATK	VarScan	LoFreq	SNVer	SAMtools	NA	NA	NA	0.336842	0.969697	0.5
GATK	VarScan	LoFreq	SNVer	VarDict	NA	NA	NA	0.326316	0.984127	0.490119
GATK	VarScan	LoFreq	SAMtools	VarDict	NA	NA	NA	0.573684	1	0.729097
GATK	VarScan	FreeBayes	SNVer	SAMtools	NA	NA	NA	0.352632	0.971014	0.517375
GATK	VarScan	FreeBayes	SNVer	VarDict	NA	NA	NA	0.373684	0.959459	0.537879
GATK	VarScan	FreeBayes	SAMtools	VarDict	NA	NA	NA	0.594737	1	0.745875
GATK	VarScan	SNVer	SAMtools	VarDict	NA	NA	NA	0.352632	1	0.521401
GATK	LoFreq	FreeBayes	SNVer	SAMtools	NA	NA	NA	0.352632	0.971014	0.517375
GATK	LoFreq	FreeBayes	SNVer	VarDict	NA	NA	NA	0.352632	0.985294	0.51938
GATK	LoFreq	FreeBayes	SAMtools	VarDict	NA	NA	NA	0.6	1	0.75
GATK	LoFreq	SNVer	SAMtools	VarDict	NA	NA	NA	0.342105	1	0.509804
GATK	FreeBayes	SNVer	SAMtools	VarDict	NA	NA	NA	0.357895	0.985507	0.525097
Platypus	VarScan	LoFreq	FreeBayes	SNVer	NA	NA	NA	0.331579	0.954545	0.492188
Platypus	VarScan	LoFreq	FreeBayes	SAMtools	NA	NA	NA	0.605263	0.891473	0.721003
Platypus	VarScan	LoFreq	FreeBayes	VarDict	NA	NA	NA	0.584211	0.991071	0.735099
Platypus	VarScan	LoFreq	SNVer	SAMtools	NA	NA	NA	0.336842	0.969697	0.5
Platypus	VarScan	LoFreq	SNVer	VarDict	NA	NA	NA	0.326316	0.984127	0.490119
Platypus	VarScan	LoFreq	SAMtools	VarDict	NA	NA	NA	0.578947	1	0.733333
Platypus	VarScan	FreeBayes	SNVer	SAMtools	NA	NA	NA	0.352632	0.971014	0.517375
Platypus	VarScan	FreeBayes	SNVer	VarDict	NA	NA	NA	0.384211	0.986486	0.55303
Platypus	VarScan	FreeBayes	SAMtools	VarDict	NA	NA	NA	0.6	1	0.75
Platypus	VarScan	SNVer	SAMtools	VarDict	NA	NA	NA	0.352632	1	0.521401
Platypus	LoFreq	FreeBayes	SNVer	SAMtools	NA	NA	NA	0.352632	0.971014	0.517375
Platypus	LoFreq	FreeBayes	SNVer	VarDict	NA	NA	NA	0.352632	0.985294	0.51938
Platypus	LoFreq	FreeBayes	SAMtools	VarDict	NA	NA	NA	0.605263	1	0.754098
Platypus	LoFreq	SNVer	SAMtools	VarDict	NA	NA	NA	0.342105	1	0.509804
Platypus	FreeBayes	SNVer	SAMtools	VarDict	NA	NA	NA	0.357895	1	0.527132
VarScan	LoFreq	FreeBayes	SNVer	SAMtools	NA	NA	NA	0.336842	0.969697	0.5
VarScan	LoFreq	FreeBayes	SNVer	VarDict	NA	NA	NA	0.326316	0.984127	0.490119
VarScan	LoFreq	FreeBayes	SAMtools	VarDict	NA	NA	NA	0.578947	1	0.733333
VarScan	LoFreq	SNVer	SAMtools	VarDict	NA	NA	NA	0.331579	1	0.498024
VarScan	FreeBayes	SNVer	SAMtools	VarDict	NA	NA	NA	0.347368	1	0.515625
LoFreq	FreeBayes	SNVer	SAMtools	VarDict	NA	NA	NA	0.347368	1	0.515625
GATK	Platypus	VarScan	LoFreq	FreeBayes	SNVer	NA	NA	0.326316	0.953846	0.486275
GATK	Platypus	VarScan	LoFreq	FreeBayes	SAMtools	NA	NA	0.584211	0.982301	0.732673
GATK	Platypus	VarScan	LoFreq	FreeBayes	VarDict	NA	NA	0.573684	0.990909	0.726667
GATK	Platypus	VarScan	LoFreq	SNVer	SAMtools	NA	NA	0.331579	0.969231	0.494118
GATK	Platypus	VarScan	LoFreq	SNVer	VarDict	NA	NA	0.321053	0.983871	0.484127
GATK	Platypus	VarScan	LoFreq	SAMtools	VarDict	NA	NA	0.568421	1	0.724832
GATK	Platypus	VarScan	FreeBayes	SNVer	SAMtools	NA	NA	0.347368	0.970588	0.511628
GATK	Platypus	VarScan	FreeBayes	SNVer	VarDict	NA	NA	0.368421	0.985915	0.536398
GATK	Platypus	VarScan	FreeBayes	SAMtools	VarDict	NA	NA	0.589474	1	0.741722
GATK	Platypus	VarScan	SNVer	SAMtools	VarDict	NA	NA	0.347368	1	0.515625
GATK	Platypus	LoFreq	FreeBayes	SNVer	SAMtools	NA	NA	0.347368	0.970588	0.511628
GATK	Platypus	LoFreq	FreeBayes	SNVer	VarDict	NA	NA	0.347368	0.985075	0.513619
GATK	Platypus	LoFreq	FreeBayes	SAMtools	VarDict	NA	NA	0.594737	1	0.745875	best 6tool combination of both training sets
GATK	Platypus	LoFreq	SNVer	SAMtools	VarDict	NA	NA	0.336842	1	0.503937
GATK	Platypus	FreeBayes	SNVer	SAMtools	VarDict	NA	NA	0.352632	1	0.521401
GATK	VarScan	LoFreq	FreeBayes	SNVer	SAMtools	NA	NA	0.331579	0.969231	0.494118
GATK	VarScan	LoFreq	FreeBayes	SNVer	VarDict	NA	NA	0.321053	0.983871	0.484127
GATK	VarScan	LoFreq	FreeBayes	SAMtools	VarDict	NA	NA	0.568421	1	0.724832
GATK	VarScan	LoFreq	SNVer	SAMtools	VarDict	NA	NA	0.326316	1	0.492063
GATK	VarScan	FreeBayes	SNVer	SAMtools	VarDict	NA	NA	0.342105	1	0.509804
GATK	LoFreq	FreeBayes	SNVer	SAMtools	VarDict	NA	NA	0.336842	1	0.503937
Platypus	VarScan	LoFreq	FreeBayes	SNVer	SAMtools	NA	NA	0.331579	0.969231	0.494118
Platypus	VarScan	LoFreq	FreeBayes	SNVer	VarDict	NA	NA	0.321053	0.983871	0.484127
Platypus	VarScan	LoFreq	FreeBayes	SAMtools	VarDict	NA	NA	0.573684	1	0.729097
Platypus	VarScan	LoFreq	SNVer	SAMtools	VarDict	NA	NA	0.326316	1	0.492063
Platypus	VarScan	FreeBayes	SNVer	SAMtools	VarDict	NA	NA	0.342105	1	0.509804
Platypus	LoFreq	FreeBayes	SNVer	SAMtools	VarDict	NA	NA	0.336842	1	0.503937
VarScan	LoFreq	FreeBayes	SNVer	SAMtools	VarDict	NA	NA	0.326316	1	0.492063
GATK	Platypus	VarScan	LoFreq	FreeBayes	SNVer	SAMtools	NA	0.326316	0.96875	0.488189
GATK	Platypus	VarScan	LoFreq	FreeBayes	SNVer	VarDict	NA	0.315789	0.983607	0.478088
GATK	Platypus	VarScan	LoFreq	FreeBayes	SAMtools	VarDict	NA	0.563158	1	0.720539	best 7tool combination of both training sets
GATK	Platypus	VarScan	LoFreq	SNVer	SAMtools	VarDict	NA	0.321053	1	0.486056
GATK	Platypus	VarScan	FreeBayes	SNVer	SAMtools	VarDict	NA	0.336842	1	0.503937
GATK	Platypus	LoFreq	FreeBayes	SNVer	SAMtools	VarDict	NA	0.331579	1	0.498024
GATK	VarScan	LoFreq	FreeBayes	SNVer	SAMtools	VarDict	NA	0.321053	1	0.486056
Platypus	VarScan	LoFreq	FreeBayes	SNVer	SAMtools	VarDict	NA	0.321053	1	0.486056
GATK	Platypus	VarScan	LoFreq	FreeBayes	SNVer	SAMtools	VarDict	0.315789	1	0.48	8 tools

## Sheet: Test 5
Caller 1	Caller 2	Caller 3	Caller 4	Caller 5	Caller 6	Caller 7	Caller 8	Sensitivity	PPV	F1
GATK	NA	NA	NA	NA	NA	NA	NA	0.84456	0.372146	0.51664	best single tool of both training sets
Platypus	NA	NA	NA	NA	NA	NA	NA	0.896373	0.426108	0.577629
VarScan	NA	NA	NA	NA	NA	NA	NA	0.720207	0.425076	0.534615
LoFreq	NA	NA	NA	NA	NA	NA	NA	0.715026	0.222581	0.339483
FreeBayes	NA	NA	NA	NA	NA	NA	NA	0.932642	0.0140559	0.0276944
SNVer	NA	NA	NA	NA	NA	NA	NA	0.626943	0.664835	0.645333
SAMtools	NA	NA	NA	NA	NA	NA	NA	0.689119	0.841772	0.757835
VarDict	NA	NA	NA	NA	NA	NA	NA	0.896373	0.162594	0.275259	best solution training set 1
GATK	Platypus	NA	NA	NA	NA	NA	NA	0.839378	0.782609	0.81
GATK	VarScan	NA	NA	NA	NA	NA	NA	0.668394	0.86	0.752187
GATK	LoFreq	NA	NA	NA	NA	NA	NA	0.647668	0.796178	0.714286
GATK	FreeBayes	NA	NA	NA	NA	NA	NA	0.829016	0.43956	0.574506
GATK	SNVer	NA	NA	NA	NA	NA	NA	0.554404	0.938596	0.697068
GATK	SAMtools	NA	NA	NA	NA	NA	NA	0.65285	0.969231	0.780186
GATK	VarDict	NA	NA	NA	NA	NA	NA	0.80829	0.847826	0.827586
Platypus	VarScan	NA	NA	NA	NA	NA	NA	0.699482	0.944056	0.803571
Platypus	LoFreq	NA	NA	NA	NA	NA	NA	0.673575	0.844156	0.74928
Platypus	FreeBayes	NA	NA	NA	NA	NA	NA	0.875648	0.433333	0.57976
Platypus	SNVer	NA	NA	NA	NA	NA	NA	0.585492	0.882812	0.70405
Platypus	SAMtools	NA	NA	NA	NA	NA	NA	0.668394	0.962687	0.788991
Platypus	VarDict	NA	NA	NA	NA	NA	NA	0.834197	0.879781	0.856383	best combination of both training sets
VarScan	LoFreq	NA	NA	NA	NA	NA	NA	0.61658	0.695906	0.653846
VarScan	FreeBayes	NA	NA	NA	NA	NA	NA	0.689119	0.618605	0.651961
VarScan	SNVer	NA	NA	NA	NA	NA	NA	0.42487	0.97619	0.592058
VarScan	SAMtools	NA	NA	NA	NA	NA	NA	0.647668	0.968992	0.776398
VarScan	VarDict	NA	NA	NA	NA	NA	NA	0.673575	0.588235	0.628019
LoFreq	FreeBayes	NA	NA	NA	NA	NA	NA	0.704663	0.228571	0.345178
LoFreq	SNVer	NA	NA	NA	NA	NA	NA	0.404145	0.684211	0.508143
LoFreq	SAMtools	NA	NA	NA	NA	NA	NA	0.647668	0.94697	0.769231
LoFreq	VarDict	NA	NA	NA	NA	NA	NA	0.668394	0.338583	0.449477
FreeBayes	SNVer	NA	NA	NA	NA	NA	NA	0.601036	0.70303	0.648045
FreeBayes	SAMtools	NA	NA	NA	NA	NA	NA	0.668394	0.837662	0.743516
FreeBayes	VarDict	NA	NA	NA	NA	NA	NA	0.854922	0.285962	0.428571
SNVer	SAMtools	NA	NA	NA	NA	NA	NA	0.388601	0.974026	0.555556
SNVer	VarDict	NA	NA	NA	NA	NA	NA	0.580311	0.732026	0.647399
SAMtools	VarDict	NA	NA	NA	NA	NA	NA	0.647668	0.961538	0.773994
GATK	Platypus	VarScan	NA	NA	NA	NA	NA	0.663212	0.969697	0.787692
GATK	Platypus	LoFreq	NA	NA	NA	NA	NA	0.642487	0.918519	0.756098
GATK	Platypus	FreeBayes	NA	NA	NA	NA	NA	0.823834	0.791045	0.807107
GATK	Platypus	SNVer	NA	NA	NA	NA	NA	0.549223	0.946429	0.695082
GATK	Platypus	SAMtools	NA	NA	NA	NA	NA	0.647668	0.976562	0.778816
GATK	Platypus	VarDict	NA	NA	NA	NA	NA	0.803109	0.933735	0.86351
GATK	VarScan	LoFreq	NA	NA	NA	NA	NA	0.595855	0.905512	0.71875
GATK	VarScan	FreeBayes	NA	NA	NA	NA	NA	0.65285	0.863014	0.743363
GATK	VarScan	SNVer	NA	NA	NA	NA	NA	0.398964	0.974684	0.566176
GATK	VarScan	SAMtools	NA	NA	NA	NA	NA	0.61658	0.97541	0.755556
GATK	VarScan	VarDict	NA	NA	NA	NA	NA	0.642487	0.984127	0.777429
GATK	LoFreq	FreeBayes	NA	NA	NA	NA	NA	0.642487	0.805195	0.714697
GATK	LoFreq	SNVer	NA	NA	NA	NA	NA	0.367876	0.946667	0.529851
GATK	LoFreq	SAMtools	NA	NA	NA	NA	NA	0.621762	0.97561	0.759494
GATK	LoFreq	VarDict	NA	NA	NA	NA	NA	0.621762	0.895522	0.733945
GATK	FreeBayes	SNVer	NA	NA	NA	NA	NA	0.53886	0.954128	0.688742
GATK	FreeBayes	SAMtools	NA	NA	NA	NA	NA	0.642487	0.96875	0.772586
GATK	FreeBayes	VarDict	NA	NA	NA	NA	NA	0.792746	0.854749	0.822581
GATK	SNVer	SAMtools	NA	NA	NA	NA	NA	0.378238	0.986486	0.546816
GATK	SNVer	VarDict	NA	NA	NA	NA	NA	0.528497	0.962264	0.682274
GATK	SAMtools	VarDict	NA	NA	NA	NA	NA	0.626943	0.98374	0.765823
Platypus	VarScan	LoFreq	NA	NA	NA	NA	NA	0.611399	0.983333	0.753994
Platypus	VarScan	FreeBayes	NA	NA	NA	NA	NA	0.683938	0.94964	0.795181
Platypus	VarScan	SNVer	NA	NA	NA	NA	NA	0.414508	0.97561	0.581818
Platypus	VarScan	SAMtools	NA	NA	NA	NA	NA	0.632124	0.976	0.767296
Platypus	VarScan	VarDict	NA	NA	NA	NA	NA	0.658031	0.984496	0.78882
Platypus	LoFreq	FreeBayes	NA	NA	NA	NA	NA	0.663212	0.85906	0.748538
Platypus	LoFreq	SNVer	NA	NA	NA	NA	NA	0.373057	0.857143	0.519856
Platypus	LoFreq	SAMtools	NA	NA	NA	NA	NA	0.637306	0.968504	0.76875
Platypus	LoFreq	VarDict	NA	NA	NA	NA	NA	0.637306	0.866197	0.734328
Platypus	FreeBayes	SNVer	NA	NA	NA	NA	NA	0.564767	0.908333	0.696486
Platypus	FreeBayes	SAMtools	NA	NA	NA	NA	NA	0.658031	0.962121	0.781538
Platypus	FreeBayes	VarDict	NA	NA	NA	NA	NA	0.813472	0.882022	0.846361	best 3tool combination of both training sets	best solution training set 2
Platypus	SNVer	SAMtools	NA	NA	NA	NA	NA	0.378238	0.973333	0.544776
Platypus	SNVer	VarDict	NA	NA	NA	NA	NA	0.544041	0.921053	0.684039
Platypus	SAMtools	VarDict	NA	NA	NA	NA	NA	0.632124	0.968254	0.76489
VarScan	LoFreq	FreeBayes	NA	NA	NA	NA	NA	0.611399	0.694118	0.650138
VarScan	LoFreq	SNVer	NA	NA	NA	NA	NA	0.336788	0.984848	0.501931
VarScan	LoFreq	SAMtools	NA	NA	NA	NA	NA	0.606218	0.975	0.747604
VarScan	LoFreq	VarDict	NA	NA	NA	NA	NA	0.585492	0.982609	0.733766
VarScan	FreeBayes	SNVer	NA	NA	NA	NA	NA	0.404145	0.987342	0.573529
VarScan	FreeBayes	SAMtools	NA	NA	NA	NA	NA	0.626943	0.968	0.761006
VarScan	FreeBayes	VarDict	NA	NA	NA	NA	NA	0.647668	0.984252	0.78125
VarScan	SNVer	SAMtools	NA	NA	NA	NA	NA	0.362694	0.985915	0.530303
VarScan	SNVer	VarDict	NA	NA	NA	NA	NA	0.404145	0.987342	0.573529
VarScan	SAMtools	VarDict	NA	NA	NA	NA	NA	0.611399	0.983333	0.753994
LoFreq	FreeBayes	SNVer	NA	NA	NA	NA	NA	0.393782	0.71028	0.506667
LoFreq	FreeBayes	SAMtools	NA	NA	NA	NA	NA	0.642487	0.946565	0.765432
LoFreq	FreeBayes	VarDict	NA	NA	NA	NA	NA	0.658031	0.343243	0.451155
LoFreq	SNVer	SAMtools	NA	NA	NA	NA	NA	0.362694	0.972222	0.528302
LoFreq	SNVer	VarDict	NA	NA	NA	NA	NA	0.38342	0.691589	0.493333
LoFreq	SAMtools	VarDict	NA	NA	NA	NA	NA	0.611399	0.95935	0.746835
FreeBayes	SNVer	SAMtools	NA	NA	NA	NA	NA	0.378238	0.973333	0.544776
FreeBayes	SNVer	VarDict	NA	NA	NA	NA	NA	0.554404	0.758865	0.640719
FreeBayes	SAMtools	VarDict	NA	NA	NA	NA	NA	0.632124	0.96063	0.7625
SNVer	SAMtools	VarDict	NA	NA	NA	NA	NA	0.373057	0.972973	0.539326
GATK	Platypus	VarScan	LoFreq	NA	NA	NA	NA	0.590674	0.982759	0.737864
GATK	Platypus	VarScan	FreeBayes	NA	NA	NA	NA	0.647668	0.976562	0.778816
GATK	Platypus	VarScan	SNVer	NA	NA	NA	NA	0.393782	0.974359	0.560886
GATK	Platypus	VarScan	SAMtools	NA	NA	NA	NA	0.611399	0.975207	0.751592
GATK	Platypus	VarScan	VarDict	NA	NA	NA	NA	0.637306	0.984	0.773585
GATK	Platypus	LoFreq	FreeBayes	NA	NA	NA	NA	0.637306	0.924812	0.754601
GATK	Platypus	LoFreq	SNVer	NA	NA	NA	NA	0.362694	0.945946	0.524345
GATK	Platypus	LoFreq	SAMtools	NA	NA	NA	NA	0.61658	0.983471	0.757962
GATK	Platypus	LoFreq	VarDict	NA	NA	NA	NA	0.61658	0.929688	0.741433
GATK	Platypus	FreeBayes	SNVer	NA	NA	NA	NA	0.533679	0.962617	0.686667
GATK	Platypus	FreeBayes	SAMtools	NA	NA	NA	NA	0.637306	0.97619	0.77116
GATK	Platypus	FreeBayes	VarDict	NA	NA	NA	NA	0.787565	0.932515	0.853933	best 4tool combination of both training sets
GATK	Platypus	SNVer	SAMtools	NA	NA	NA	NA	0.373057	0.986301	0.541353
GATK	Platypus	SNVer	VarDict	NA	NA	NA	NA	0.523316	0.971154	0.680135
GATK	Platypus	SAMtools	VarDict	NA	NA	NA	NA	0.621762	0.983607	0.761905
GATK	VarScan	LoFreq	FreeBayes	NA	NA	NA	NA	0.590674	0.904762	0.714734
GATK	VarScan	LoFreq	SNVer	NA	NA	NA	NA	0.331606	0.984615	0.496124
GATK	VarScan	LoFreq	SAMtools	NA	NA	NA	NA	0.585492	0.982609	0.733766
GATK	VarScan	LoFreq	VarDict	NA	NA	NA	NA	0.57513	0.982301	0.72549
GATK	VarScan	FreeBayes	SNVer	NA	NA	NA	NA	0.38342	0.986667	0.552239
GATK	VarScan	FreeBayes	SAMtools	NA	NA	NA	NA	0.606218	0.975	0.747604
GATK	VarScan	FreeBayes	VarDict	NA	NA	NA	NA	0.626943	0.98374	0.765823
GATK	VarScan	SNVer	SAMtools	NA	NA	NA	NA	0.357513	0.985714	0.524715
GATK	VarScan	SNVer	VarDict	NA	NA	NA	NA	0.38342	0.986667	0.552239
GATK	VarScan	SAMtools	VarDict	NA	NA	NA	NA	0.595855	0.982906	0.741935
GATK	LoFreq	FreeBayes	SNVer	NA	NA	NA	NA	0.362694	0.958904	0.526316
GATK	LoFreq	FreeBayes	SAMtools	NA	NA	NA	NA	0.61658	0.97541	0.755556
GATK	LoFreq	FreeBayes	VarDict	NA	NA	NA	NA	0.61658	0.894737	0.730061
GATK	LoFreq	SNVer	SAMtools	NA	NA	NA	NA	0.352332	0.985507	0.519084
GATK	LoFreq	SNVer	VarDict	NA	NA	NA	NA	0.352332	0.957746	0.515152
GATK	LoFreq	SAMtools	VarDict	NA	NA	NA	NA	0.595855	0.982906	0.741935
GATK	FreeBayes	SNVer	SAMtools	NA	NA	NA	NA	0.367876	0.986111	0.535849
GATK	FreeBayes	SNVer	VarDict	NA	NA	NA	NA	0.512953	0.961165	0.668919
GATK	FreeBayes	SAMtools	VarDict	NA	NA	NA	NA	0.61658	0.983471	0.757962
GATK	SNVer	SAMtools	VarDict	NA	NA	NA	NA	0.362694	0.985915	0.530303
Platypus	VarScan	LoFreq	FreeBayes	NA	NA	NA	NA	0.606218	0.983193	0.75
Platypus	VarScan	LoFreq	SNVer	NA	NA	NA	NA	0.331606	0.984615	0.496124
Platypus	VarScan	LoFreq	SAMtools	NA	NA	NA	NA	0.601036	0.983051	0.745981
Platypus	VarScan	LoFreq	VarDict	NA	NA	NA	NA	0.580311	0.982456	0.729642
Platypus	VarScan	FreeBayes	SNVer	NA	NA	NA	NA	0.398964	0.987179	0.568266
Platypus	VarScan	FreeBayes	SAMtools	NA	NA	NA	NA	0.621762	0.97561	0.759494
Platypus	VarScan	FreeBayes	VarDict	NA	NA	NA	NA	0.642487	0.984127	0.777429
Platypus	VarScan	SNVer	SAMtools	NA	NA	NA	NA	0.357513	0.985714	0.524715
Platypus	VarScan	SNVer	VarDict	NA	NA	NA	NA	0.393782	0.987013	0.562963
Platypus	VarScan	SAMtools	VarDict	NA	NA	NA	NA	0.601036	0.983051	0.745981
Platypus	LoFreq	FreeBayes	SNVer	NA	NA	NA	NA	0.362694	0.875	0.512821
Platypus	LoFreq	FreeBayes	SAMtools	NA	NA	NA	NA	0.632124	0.968254	0.76489
Platypus	LoFreq	FreeBayes	VarDict	NA	NA	NA	NA	0.626943	0.870504	0.728916
Platypus	LoFreq	SNVer	SAMtools	NA	NA	NA	NA	0.352332	0.971429	0.51711
Platypus	LoFreq	SNVer	VarDict	NA	NA	NA	NA	0.357513	0.884615	0.509225
Platypus	LoFreq	SAMtools	VarDict	NA	NA	NA	NA	0.601036	0.966667	0.741214
Platypus	FreeBayes	SNVer	SAMtools	NA	NA	NA	NA	0.367876	0.972603	0.533835
Platypus	FreeBayes	SNVer	VarDict	NA	NA	NA	NA	0.523316	0.926606	0.668874
Platypus	FreeBayes	SAMtools	VarDict	NA	NA	NA	NA	0.621762	0.967742	0.757098
Platypus	SNVer	SAMtools	VarDict	NA	NA	NA	NA	0.362694	0.972222	0.528302
VarScan	LoFreq	FreeBayes	SNVer	NA	NA	NA	NA	0.331606	0.984615	0.496124
VarScan	LoFreq	FreeBayes	SAMtools	NA	NA	NA	NA	0.601036	0.97479	0.74359
VarScan	LoFreq	FreeBayes	VarDict	NA	NA	NA	NA	0.580311	0.982456	0.729642
VarScan	LoFreq	SNVer	SAMtools	NA	NA	NA	NA	0.336788	0.984848	0.501931
VarScan	LoFreq	SNVer	VarDict	NA	NA	NA	NA	0.326425	0.984375	0.490272
VarScan	LoFreq	SAMtools	VarDict	NA	NA	NA	NA	0.57513	0.982301	0.72549
VarScan	FreeBayes	SNVer	SAMtools	NA	NA	NA	NA	0.352332	0.985507	0.519084
VarScan	FreeBayes	SNVer	VarDict	NA	NA	NA	NA	0.38342	0.986667	0.552239
VarScan	FreeBayes	SAMtools	VarDict	NA	NA	NA	NA	0.595855	0.982906	0.741935
VarScan	SNVer	SAMtools	VarDict	NA	NA	NA	NA	0.352332	0.985507	0.519084
LoFreq	FreeBayes	SNVer	SAMtools	NA	NA	NA	NA	0.357513	0.971831	0.522727
LoFreq	FreeBayes	SNVer	VarDict	NA	NA	NA	NA	0.373057	0.712871	0.489796
LoFreq	FreeBayes	SAMtools	VarDict	NA	NA	NA	NA	0.606218	0.959016	0.742857
LoFreq	SNVer	SAMtools	VarDict	NA	NA	NA	NA	0.34715	0.971014	0.51145
FreeBayes	SNVer	SAMtools	VarDict	NA	NA	NA	NA	0.362694	0.972222	0.528302
GATK	Platypus	VarScan	LoFreq	FreeBayes	NA	NA	NA	0.585492	0.982609	0.733766
GATK	Platypus	VarScan	LoFreq	SNVer	NA	NA	NA	0.326425	0.984375	0.490272
GATK	Platypus	VarScan	LoFreq	SAMtools	NA	NA	NA	0.580311	0.982456	0.729642
GATK	Platypus	VarScan	LoFreq	VarDict	NA	NA	NA	0.569948	0.982143	0.721311
GATK	Platypus	VarScan	FreeBayes	SNVer	NA	NA	NA	0.378238	0.986486	0.546816
GATK	Platypus	VarScan	FreeBayes	SAMtools	NA	NA	NA	0.601036	0.97479	0.74359
GATK	Platypus	VarScan	FreeBayes	VarDict	NA	NA	NA	0.621762	0.983607	0.761905
GATK	Platypus	VarScan	SNVer	SAMtools	NA	NA	NA	0.352332	0.985507	0.519084
GATK	Platypus	VarScan	SNVer	VarDict	NA	NA	NA	0.378238	0.986486	0.546816
GATK	Platypus	VarScan	SAMtools	VarDict	NA	NA	NA	0.590674	0.982759	0.737864
GATK	Platypus	LoFreq	FreeBayes	SNVer	NA	NA	NA	0.357513	0.958333	0.520755
GATK	Platypus	LoFreq	FreeBayes	SAMtools	NA	NA	NA	0.611399	0.983333	0.753994
GATK	Platypus	LoFreq	FreeBayes	VarDict	NA	NA	NA	0.611399	0.929134	0.7375	best 5tool combination of both training sets
GATK	Platypus	LoFreq	SNVer	SAMtools	NA	NA	NA	0.34715	0.985294	0.51341
GATK	Platypus	LoFreq	SNVer	VarDict	NA	NA	NA	0.34715	0.957143	0.509506
GATK	Platypus	LoFreq	SAMtools	VarDict	NA	NA	NA	0.590674	0.982759	0.737864
GATK	Platypus	FreeBayes	SNVer	SAMtools	NA	NA	NA	0.362694	0.985915	0.530303
GATK	Platypus	FreeBayes	SNVer	VarDict	NA	NA	NA	0.507772	0.970297	0.666667
GATK	Platypus	FreeBayes	SAMtools	VarDict	NA	NA	NA	0.611399	0.983333	0.753994
GATK	Platypus	SNVer	SAMtools	VarDict	NA	NA	NA	0.357513	0.985714	0.524715
GATK	VarScan	LoFreq	FreeBayes	SNVer	NA	NA	NA	0.326425	0.984375	0.490272
GATK	VarScan	LoFreq	FreeBayes	SAMtools	NA	NA	NA	0.580311	0.982456	0.729642
GATK	VarScan	LoFreq	FreeBayes	VarDict	NA	NA	NA	0.569948	0.982143	0.721311
GATK	VarScan	LoFreq	SNVer	SAMtools	NA	NA	NA	0.331606	0.984615	0.496124
GATK	VarScan	LoFreq	SNVer	VarDict	NA	NA	NA	0.321244	0.984127	0.484375
GATK	VarScan	LoFreq	SAMtools	VarDict	NA	NA	NA	0.564767	0.981982	0.717105
GATK	VarScan	FreeBayes	SNVer	SAMtools	NA	NA	NA	0.34715	0.985294	0.51341
GATK	VarScan	FreeBayes	SNVer	VarDict	NA	NA	NA	0.367876	0.986111	0.535849
GATK	VarScan	FreeBayes	SAMtools	VarDict	NA	NA	NA	0.585492	0.982609	0.733766
GATK	VarScan	SNVer	SAMtools	VarDict	NA	NA	NA	0.34715	0.985294	0.51341
GATK	LoFreq	FreeBayes	SNVer	SAMtools	NA	NA	NA	0.34715	0.985294	0.51341
GATK	LoFreq	FreeBayes	SNVer	VarDict	NA	NA	NA	0.34715	0.957143	0.509506
GATK	LoFreq	FreeBayes	SAMtools	VarDict	NA	NA	NA	0.590674	0.982759	0.737864
GATK	LoFreq	SNVer	SAMtools	VarDict	NA	NA	NA	0.336788	0.984848	0.501931
GATK	FreeBayes	SNVer	SAMtools	VarDict	NA	NA	NA	0.352332	0.985507	0.519084
Platypus	VarScan	LoFreq	FreeBayes	SNVer	NA	NA	NA	0.326425	0.984375	0.490272
Platypus	VarScan	LoFreq	FreeBayes	SAMtools	NA	NA	NA	0.595855	0.982906	0.741935
Platypus	VarScan	LoFreq	FreeBayes	VarDict	NA	NA	NA	0.57513	0.982301	0.72549
Platypus	VarScan	LoFreq	SNVer	SAMtools	NA	NA	NA	0.331606	0.984615	0.496124
Platypus	VarScan	LoFreq	SNVer	VarDict	NA	NA	NA	0.321244	0.984127	0.484375
Platypus	VarScan	LoFreq	SAMtools	VarDict	NA	NA	NA	0.569948	0.982143	0.721311
Platypus	VarScan	FreeBayes	SNVer	SAMtools	NA	NA	NA	0.34715	0.985294	0.51341
Platypus	VarScan	FreeBayes	SNVer	VarDict	NA	NA	NA	0.378238	0.986486	0.546816
Platypus	VarScan	FreeBayes	SAMtools	VarDict	NA	NA	NA	0.590674	0.982759	0.737864
Platypus	VarScan	SNVer	SAMtools	VarDict	NA	NA	NA	0.34715	0.985294	0.51341
Platypus	LoFreq	FreeBayes	SNVer	SAMtools	NA	NA	NA	0.34715	0.971014	0.51145
Platypus	LoFreq	FreeBayes	SNVer	VarDict	NA	NA	NA	0.34715	0.893333	0.5
Platypus	LoFreq	FreeBayes	SAMtools	VarDict	NA	NA	NA	0.595855	0.966387	0.737179
Platypus	LoFreq	SNVer	SAMtools	VarDict	NA	NA	NA	0.336788	0.970149	0.5
Platypus	FreeBayes	SNVer	SAMtools	VarDict	NA	NA	NA	0.352332	0.971429	0.51711
VarScan	LoFreq	FreeBayes	SNVer	SAMtools	NA	NA	NA	0.331606	0.984615	0.496124
VarScan	LoFreq	FreeBayes	SNVer	VarDict	NA	NA	NA	0.321244	0.984127	0.484375
VarScan	LoFreq	FreeBayes	SAMtools	VarDict	NA	NA	NA	0.569948	0.982143	0.721311
VarScan	LoFreq	SNVer	SAMtools	VarDict	NA	NA	NA	0.326425	0.984375	0.490272
VarScan	FreeBayes	SNVer	SAMtools	VarDict	NA	NA	NA	0.341969	0.985075	0.507692
LoFreq	FreeBayes	SNVer	SAMtools	VarDict	NA	NA	NA	0.341969	0.970588	0.505747
GATK	Platypus	VarScan	LoFreq	FreeBayes	SNVer	NA	NA	0.321244	0.984127	0.484375
GATK	Platypus	VarScan	LoFreq	FreeBayes	SAMtools	NA	NA	0.57513	0.982301	0.72549
GATK	Platypus	VarScan	LoFreq	FreeBayes	VarDict	NA	NA	0.564767	0.981982	0.717105
GATK	Platypus	VarScan	LoFreq	SNVer	SAMtools	NA	NA	0.326425	0.984375	0.490272
GATK	Platypus	VarScan	LoFreq	SNVer	VarDict	NA	NA	0.316062	0.983871	0.478431
GATK	Platypus	VarScan	LoFreq	SAMtools	VarDict	NA	NA	0.559585	0.981818	0.712871
GATK	Platypus	VarScan	FreeBayes	SNVer	SAMtools	NA	NA	0.341969	0.985075	0.507692
GATK	Platypus	VarScan	FreeBayes	SNVer	VarDict	NA	NA	0.362694	0.985915	0.530303
GATK	Platypus	VarScan	FreeBayes	SAMtools	VarDict	NA	NA	0.580311	0.982456	0.729642
GATK	Platypus	VarScan	SNVer	SAMtools	VarDict	NA	NA	0.341969	0.985075	0.507692
GATK	Platypus	LoFreq	FreeBayes	SNVer	SAMtools	NA	NA	0.341969	0.985075	0.507692
GATK	Platypus	LoFreq	FreeBayes	SNVer	VarDict	NA	NA	0.341969	0.956522	0.503817
GATK	Platypus	LoFreq	FreeBayes	SAMtools	VarDict	NA	NA	0.585492	0.982609	0.733766	best 6tool combination of both training sets
GATK	Platypus	LoFreq	SNVer	SAMtools	VarDict	NA	NA	0.331606	0.984615	0.496124
GATK	Platypus	FreeBayes	SNVer	SAMtools	VarDict	NA	NA	0.34715	0.985294	0.51341
GATK	VarScan	LoFreq	FreeBayes	SNVer	SAMtools	NA	NA	0.326425	0.984375	0.490272
GATK	VarScan	LoFreq	FreeBayes	SNVer	VarDict	NA	NA	0.316062	0.983871	0.478431
GATK	VarScan	LoFreq	FreeBayes	SAMtools	VarDict	NA	NA	0.559585	0.981818	0.712871
GATK	VarScan	LoFreq	SNVer	SAMtools	VarDict	NA	NA	0.321244	0.984127	0.484375
GATK	VarScan	FreeBayes	SNVer	SAMtools	VarDict	NA	NA	0.336788	0.984848	0.501931
GATK	LoFreq	FreeBayes	SNVer	SAMtools	VarDict	NA	NA	0.331606	0.984615	0.496124
Platypus	VarScan	LoFreq	FreeBayes	SNVer	SAMtools	NA	NA	0.326425	0.984375	0.490272
Platypus	VarScan	LoFreq	FreeBayes	SNVer	VarDict	NA	NA	0.316062	0.983871	0.478431
Platypus	VarScan	LoFreq	FreeBayes	SAMtools	VarDict	NA	NA	0.564767	0.981982	0.717105
Platypus	VarScan	LoFreq	SNVer	SAMtools	VarDict	NA	NA	0.321244	0.984127	0.484375
Platypus	VarScan	FreeBayes	SNVer	SAMtools	VarDict	NA	NA	0.336788	0.984848	0.501931
Platypus	LoFreq	FreeBayes	SNVer	SAMtools	VarDict	NA	NA	0.331606	0.969697	0.494208
VarScan	LoFreq	FreeBayes	SNVer	SAMtools	VarDict	NA	NA	0.321244	0.984127	0.484375
GATK	Platypus	VarScan	LoFreq	FreeBayes	SNVer	SAMtools	NA	0.321244	0.984127	0.484375
GATK	Platypus	VarScan	LoFreq	FreeBayes	SNVer	VarDict	NA	0.310881	0.983607	0.472441
GATK	Platypus	VarScan	LoFreq	FreeBayes	SAMtools	VarDict	NA	0.554404	0.981651	0.708609	best 7tool combination of both training sets
GATK	Platypus	VarScan	LoFreq	SNVer	SAMtools	VarDict	NA	0.316062	0.983871	0.478431
GATK	Platypus	VarScan	FreeBayes	SNVer	SAMtools	VarDict	NA	0.331606	0.984615	0.496124
GATK	Platypus	LoFreq	FreeBayes	SNVer	SAMtools	VarDict	NA	0.326425	0.984375	0.490272
GATK	VarScan	LoFreq	FreeBayes	SNVer	SAMtools	VarDict	NA	0.316062	0.983871	0.478431
Platypus	VarScan	LoFreq	FreeBayes	SNVer	SAMtools	VarDict	NA	0.316062	0.983871	0.478431
GATK	Platypus	VarScan	LoFreq	FreeBayes	SNVer	SAMtools	VarDict	0.310881	0.983607	0.472441	8 tools
